# Supplementary material
Source: PubMed Central journal article supplement (PMC3347065)
Supplement: supp_194.9.2189_AllSuppData.pdf [file supp_194.9.2189_AllSuppData.pdf]

## Supplementary Data for McKenzie J.L. et al 2011

### Supplementary Fig. 1.

Trypsin digestion of the VapBC complex and subsequent purification of VapC by anion exchange chromatography. Shown is the chromatogram for the anion exchange purification, trypsin is eluted early, while VapC is eluted later at approx 20% elution buffer, corresponding to 200 mM NaCl. The molecular weight marker at the left side of the gel shows molecular masses in kilodaltons, and bands corresponding to peaks on the chromatogram are labelled (Trypsin and VapC).

### Supplementary Fig. 2.

Additional *in vitro* ribonuclease activity assays of VapC against Pentaprobe RNAs. Seven Pentaprobe RNAs were tested in total, six in the forward direction (922-927) and one reverse complement (932, the reverse complement to 926). VapC cleaved only a subset of pentaprobe RNAs across the time course (time indicated in min across top of gel) in the presence of 6 mM MgCl<sub>2</sub>. Ribonuclease activity is inhibited by 12 mM EDTA and RNA only negative controls (-VapC) demonstrate no non-specific degradation of the substrates by contaminating ribonucleases. VapC activity is inhibited when in complex with VapB (VapBC). The molecular weight marker on the left of the gel shows molecular masses of single-stranded RNA (ssRNA) in bases.

### Supplementary Fig. 3.

VapC from *M. smegmatis* does not cleave *M. smegmatis* initiator tRNA *in vitro*. VapC (61.35 pmoles) displays no ribonuclease activity against tRNA fMet (MSMEG\_1965) in the presence of 6 mM MgCl<sub>2</sub> (time points in minutes indicated along the top of the gel). Negative controls show no non-specific degradation of RNA due to contaminating ribonucleases and include: RNA only controls (-VapC) and addition of 12 mM EDTA to the assay reaction. Double RNA bands are due to premature termination of the transcription reaction due to the high GC content of the RNA. A molecular weight marker at the left side of the gel shows molecular masses of ssRNA in bases.

# Supplementary Figure 1

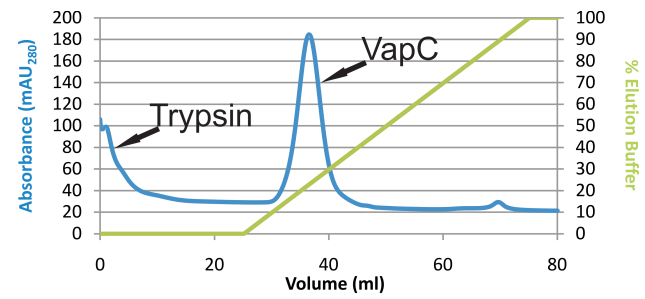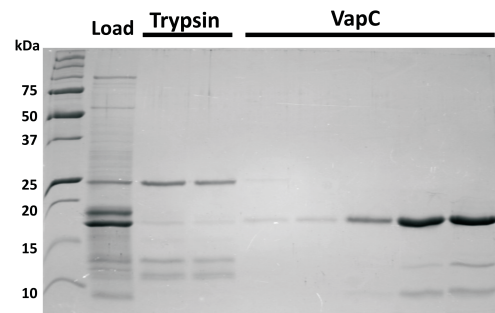

## Supplementary Figure 2

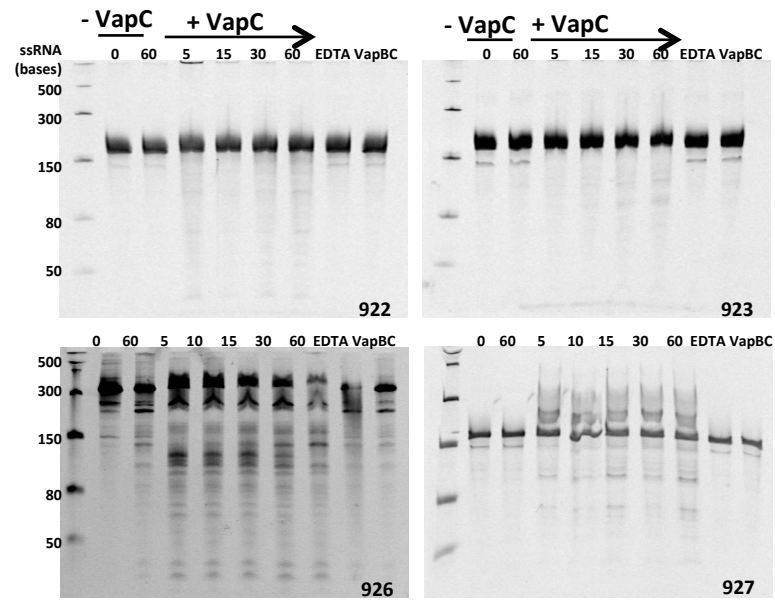



**Table S1.** Oligonucleotides used in this study

| <b>Oligo name</b> | <b>Sequence 5'-3'</b>   |
|-------------------|-------------------------|
| MSMEG_0061M F     | GACGACCTGGGTATCGACAT    |
| MSMEG_0061M R     | CAGGTATTCCTTGCGGTCAG    |
| MSMEG_0515M F     | CGCGATCGTCTACAACAAGA    |
| MSMEG_0515M R     | GAGTTGAACGCAGCCTTCTC    |
| MSMEG_0539M F     | GACAACCTGTCCGACCTCAT    |
| MSMEG_0539M R     | GTCGATCAGGATGCTCTTGC    |
| MSMEG_0649M F     | AGGAAGGTGTGGTCAAGTCG    |
| MSMEG_0649M R     | CCCTTGTCGATCATGGTCTT    |
| MSMEG_1283M F     | TGGCTCTAAGCATCAAACACC   |
| MSMEG_1283M R     | CAGGATCGATTCCGGCTGT     |
| MSMEG_1712M F     | CGACGGCAAGTTCAATTACA    |
| MSMEG_1712M R     | GTA CTGACGGTTCGGCAGAG   |
| MSMEG_4182M F     | GGCATCTTCACGTCCTTTGT    |
| MSMEG_4182M R     | ATCTTGTGTGTGGCAACGAG    |
| MSMEG_4643M F     | GCGAAAGGAACGAAGTGAAG    |
| MSMEG_4643M R     | GGTGTTGATGGACCAGTTGC    |
| MSMEG_5571M F     | GACTCGCTGAACCTCGACAT    |
| MSMEG_5571M R     | ACGGTCTTGGTGGGATACAG    |
| MSMEG_5782M F     | ACTCGACCTGAACTCGCTGT    |
| MSMEG_5782M R     | GGAAGTGAGCAAACGCTCTT    |
| SigA F            | GACTCTTCCTCGTCCCACAC    |
| SigA R            | GAAGACACCGACCTGGA ACT   |
| MSMEG_1546Q F     | GATGGACGCCGTGATGTC      |
| MSMEG_1546Q R     | CGTACTGGGTCTCCA ACTCC   |
| MSMEG_2121Q F     | GACGTGTTCTCCGACCAGTTACT |
| MSMEG_2121Q R     | GAACATCACACTCAGCGGAATG  |
| MSMEG_2122Q F     | TCGAGGTCGGTATAGGCATC    |
| MSMEG_2122Q R     | TCGGCGTACATGACGTACAA    |
| MSMEG_2123Q F     | GGTCCCCGACCAGATGCT      |

|                       |                                                 |
|-----------------------|-------------------------------------------------|
| MSMEG_2123Q R         | GGCCATCTCGAAGTTCATCAC                           |
| MSMEG_2124Q F         | CGGCCATCCAAGCCTTT                               |
| MSMEG_2124Q R         | CTCCGAAAACGGTGAACACA                            |
| MSMEG_6239Q F         | CGAAGGACCATGAGATCACC                            |
| MSMEG_6239Q R         | GTATCGGTGACGATGCAGAA                            |
| MSMEG_6758Q F         | CAGCACGGCGTTTCATGA                              |
| MSMEG_6758Q R         | CAGCGGCCCGACAATG                                |
| MSMEG_6759Q F         | ACACAACCCGGTCGAGATCT                            |
| MSMEG_6759Q R         | GCTTGGCGGCGTTGAG                                |
| MSMEG_6761Q F         | CGACGAGTTGCTCGAAATCA                            |
| MSMEG_6761Q R         | GTAGTACGCCTCCACCTTGAGATAC                       |
| MSMEG_2124 RT R       | CAGTTGGTCGCACTCGACATGG                          |
| MSMEG_2124 RT F       | GTAGCCAGCCGTGTCCCG                              |
| 932 50 Fwd            | GTGCTGGAATTCTGCAGATCTCCA                        |
| 932 150 Rev           | ATCGGGTCATGTAGTGCTACGTTACGGCC                   |
| T7 932 50 Fwd         | TAATACGACTCACTATAGGGGTGCTGGAATTCTGCAGATC        |
| MSMEG_2124 77-98 RT F | ATGGTCCAGATCACATTCGACA                          |
| pCDNA3 PP F           | AGAGAACCCACTGCTTACTGGCT                         |
| pCDNA3PP R            | AGCGAGCTCTAGCATTTAGGTGACA                       |
| pUC/M13 F             | CGCCAGGGTTTTCCAGTCACGAC                         |
| pUC/M13 R             | TCACACAGGAAACAGCTATGAC                          |
| MS_2124 T7 pGEM F     | TAATACGACTCACTATAGGGAGACCTTCCGTCGGAAC TTCAGC    |
| MS_2124 T7 pGEM R     | CTCAGTTGGTCGCACTCGAC                            |
| MSMEG_1965 RNA F      | CGCGGGGTGGAGCAGCTCGGTA                          |
| MSMEG_1965 RNA R      | TAGTAGCGGGGACAGGATTCGA                          |
| MSMEG_1965 RNA T7 F   | GAGCTAATACGACTCACTATAGGGCGCGGGGTGGAGCA          |
| MSMEG_2121 RNA F      | ATGACGGTCGGCATCGTCGTCG                          |
| MSMEG_2121 RNA R      | TCAGCCGAGCAGGTCACGCAC                           |
| MSMEG_2121 RNA T7 F   | CCGCGTAATACGACTCACTATAGGGAGAATGACGGTCGGCATCGTCG |
| MSMEG_2122 RNA F      | ATGGACCTGTCGACACTGACCGCCTG                      |

|                             |                                                 |
|-----------------------------|-------------------------------------------------|
| MSMEG_2122 RNA R            | TCATGAAGTGCTCCCCGCCGCG                          |
| MSMEG_2122 RNA T7 F         | CACCCCTAATACGACTCACTATAGGGAGAATGGACCTGTCGACACTG |
| MSMEG_2123 RNA F            | ATGAAAAAGCTCATCAACGATCCCG                       |
| MSMEG_2123 RNA R            | TCAGCATCCCCTCCGCAGTG                            |
| MSMEG_2123 RNA T7 F         | GTCGATAATACGACTCACTATAGGGAGAATGAAAAAGCTCATCAACG |
| MSMEG_2124 (-5'UTR) RNA F   | GAGCCGTCATTGATCCAGAAAC                          |
| MSMEG_2124 (-5'UTR) RNA R   | GAGCCGTCATTGATCCAGAAAC                          |
| MSMEG_2124 (-5'UTR) RNA T7F | TCGATAATACGACTCACTATAGGGATGGACGAGCCGTCATTGATC   |
| T7 F (Sequencing)           | TAATACGACTCACTATAGGG                            |
| T7 R                        | TAGTTATTGCTCAGCGGTGG                            |
| 932 RNA Oligo 1 21-50       | GGAAUUCUGCAGAUUCUCCAACCUCACACCA                 |
| 932 RNA Oligo 2 41-70       | CCUCACACCACAUUACACUGGGGUGAUUA                   |
| 932 RNA Oligo 3 61-90       | GGGGUGAUUAUAUAUGAUGCCGGGCGGGGGCCG               |
| 932 RNA Oligo 4 81-110      | GGGCCGUAACGUAGCACUACAUGACCCGAUACGCUA            |
| 932 RNA Oligo 5 101-130     | CCGAUACGCUAGGUGGGAUUAGGCAUCACAC                 |
| 932 RNA Oligo 6 121-150     | AGGCAUCACACUGGCGGCCGCUCGAGCAUGC                 |
| 932 RNA Oligo 7 141-170     | UAGAGGGCCCUAUUCUAUAGUGUCACCUAAA                 |
| 932 RNA Oligo 8 161-190     | CGAGCAUGCAUCUAGCUAAAUGCUAGAGCUCG                |
| 932 RNA Oligo 9             | CACACUGGCGGCCGCUAACGGCCGCCAGUGUG                |

---

**Table S2** Summary dataset of expression ratios in response to VapC

| <b>Locus</b> | <b>GeneN</b>                                                                          | <b>GeneS</b> | <b>Gene mean</b> | <b>Adj p value</b> |
|--------------|---------------------------------------------------------------------------------------|--------------|------------------|--------------------|
| MSMEG_0001   | DNA polymerase III, beta subunit                                                      | dnaN         | 0.946            | 1.77E-01           |
| MSMEG_0002   | 6-phosphogluconate dehydrogenase, decarboxylating                                     | NA           | 1.016            | 7.38E-01           |
| MSMEG_0003   | DNA replication and repair protein RecF                                               | NA           | 1.088            | 3.68E-01           |
| MSMEG_0004   | hypothetical protein                                                                  | NA           | 0.992            | 5.18E-01           |
| MSMEG_0005   | DNA gyrase, B subunit                                                                 | gyrB         | 0.784            | 2.58E-03           |
| MSMEG_0006   | DNA gyrase, A subunit                                                                 | gyrA         | 0.854            | 4.44E-02           |
| MSMEG_0007   | conserved hypothetical protein                                                        | NA           | 1.020            | 6.97E-01           |
| MSMEG_0009   | hypothetical protein                                                                  | NA           | 1.640            | 3.35E-01           |
| MSMEG_0011   | FAD-binding 9, siderophore-interacting                                                | NA           | 1.435            | 7.44E-02           |
| MSMEG_0012   | ferric enterobactin transport system permease protein FepD                            | NA           | 1.419            | 1.63E-01           |
| MSMEG_0013   | ferric enterobactin transport system permease protein FepG; this gene contains a fran | NA           | 1.070            | 6.51E-01           |
| MSMEG_0014   | Formyl transferase                                                                    | NA           | 0.957            | 4.90E-01           |
| MSMEG_0015   | ferric enterobactin transport ATP-binding protein FepC                                | NA           | 0.988            | 9.01E-01           |
| MSMEG_0016   | conserved domain protein                                                              | NA           | 1.253            | 1.27E-01           |
| MSMEG_0017   | ABC transporter, permease/ATP-binding protein                                         | NA           | 1.000            | 1.00E+00           |
| MSMEG_0018   | ABC transporter, permease/ATP-binding protein                                         | NA           | 1.218            | 4.48E-01           |
| MSMEG_0019   | amino acid adenylation                                                                | NA           | 0.930            | 2.50E-01           |
| MSMEG_0020   | Periplasmic binding protein                                                           | NA           | 0.914            | 6.96E-02           |
| MSMEG_0021   | aspartate 1-decarboxylase                                                             | panD         | 0.809            | 8.01E-03           |
| MSMEG_0022   | L-ornithine 5-monooxygenase                                                           | NA           | 0.772            | 2.89E-02           |
| MSMEG_0023   | conserved hypothetical protein                                                        | NA           | 0.774            | 1.23E-02           |
| MSMEG_0024   | peptidyl-prolyl cis-trans isomerase B                                                 | NA           | 0.881            | 6.16E-02           |
| MSMEG_0025   | conserved hypothetical protein                                                        | NA           | 1.000            | 9.99E-01           |
| MSMEG_0026   | putative membrane protein                                                             | NA           | 0.922            | 7.24E-02           |
| MSMEG_0027   | conserved hypothetical protein                                                        | NA           | 0.995            | 9.37E-01           |
| MSMEG_0028   | serine-threonine protein kinase                                                       | NA           | 0.886            | 1.41E-02           |
| MSMEG_0029   | anthranilate synthase component 2                                                     | NA           | 1.072            | 2.20E-01           |



|            |                                                                                      |      |       |          |
|------------|--------------------------------------------------------------------------------------|------|-------|----------|
| MSMEG_0030 | serine/threonine protein kinase PknA                                                 | pknA | 0.827 | 8.69E-04 |
| MSMEG_0031 | Penicillin binding protein transpeptidase domain protein                             | NA   | 0.892 | 1.24E-01 |
| MSMEG_0032 | cell cycle protein, FtsW/RodA/SpoVE family protein                                   | NA   | 0.988 | 8.06E-01 |
| MSMEG_0033 | protein phosphatase 2C                                                               | NA   | 0.875 | 6.72E-02 |
| MSMEG_0034 | FHA domain protein                                                                   | NA   | 0.940 | 2.44E-01 |
| MSMEG_0035 | FHA domain protein                                                                   | NA   | 1.051 | 7.00E-01 |
| MSMEG_0036 | hypothetical protein                                                                 | NA   | 1.342 | 1.05E-01 |
| MSMEG_0038 | putative glucose-methanol-choline oxidoreductase; this region contains one or more p | NA   | 1.092 | 3.86E-01 |
| MSMEG_0039 | small membrane hydrophobic protein                                                   | NA   | 1.097 | 3.18E-01 |
| MSMEG_0040 | conserved hypothetical protein                                                       | NA   | 1.056 | 2.66E-01 |
| MSMEG_0041 | conserved hypothetical protein                                                       | NA   | 0.968 | 5.52E-01 |
| MSMEG_0042 | TetR-family protein transcriptional regulator                                        | NA   | 1.105 | 5.45E-02 |
| MSMEG_0043 | extradiol ring-cleavage dioxygenase, class III enzyme, subunit B                     | NA   | 1.180 | 7.48E-02 |
| MSMEG_0044 | hypothetical protein                                                                 | NA   | 0.947 | 3.67E-01 |
| MSMEG_0045 | hypothetical protein                                                                 | NA   | 0.936 | 4.20E-01 |
| MSMEG_0046 | conserved hypothetical protein                                                       | NA   | 1.003 | 9.81E-01 |
| MSMEG_0047 | hypothetical protein                                                                 | NA   | 0.787 | 5.01E-02 |
| MSMEG_0048 | pyridoxamine 5'-phosphate oxidase family protein                                     | NA   | 0.687 | 8.50E-03 |
| MSMEG_0049 | pirin domain protein                                                                 | NA   | 1.103 | 2.18E-01 |
| MSMEG_0050 | conserved hypothetical protein                                                       | NA   | 0.897 | 1.14E-01 |
| MSMEG_0051 | transcription factor WhiB family protein                                             | NA   | 0.939 | 4.13E-01 |
| MSMEG_0052 | conserved hypothetical protein                                                       | NA   | 1.155 | 1.62E-01 |
| MSMEG_0053 | conserved hypothetical protein                                                       | NA   | 0.996 | 9.16E-01 |
| MSMEG_0053 | conserved hypothetical protein                                                       | NA   | 1.115 | 2.64E-02 |
| MSMEG_0055 | hypothetical protein                                                                 | NA   | 0.946 | 1.23E-01 |
| MSMEG_0056 | hypothetical protein                                                                 | NA   | 0.880 | 1.30E-01 |
| MSMEG_0057 | conserved hypothetical protein                                                       | NA   | 0.866 | 1.15E-02 |
| MSMEG_0058 | conserved hypothetical protein                                                       | NA   | 0.838 | 4.49E-02 |
| MSMEG_0059 | ATPase, AAA family protein                                                           | NA   | 0.870 | 3.04E-02 |
| MSMEG_0060 | conserved hypothetical protein                                                       | NA   | 0.741 | 4.40E-03 |
| MSMEG_0061 | ftsk/spoiii family protein                                                           | NA   | 0.676 | 2.15E-03 |

|            |                                                  |      |       |          |
|------------|--------------------------------------------------|------|-------|----------|
| MSMEG_0062 | ftsk/spoiii family protein                       | NA   | 0.651 | 7.71E-03 |
| MSMEG_0063 | PE family protein                                | NA   | 0.847 | 6.04E-02 |
| MSMEG_0064 | ppe family protein                               | NA   | 0.827 | 1.53E-03 |
| MSMEG_0065 | conserved hypothetical protein                   | NA   | 0.828 | 5.86E-03 |
| MSMEG_0066 | early secretory antigenic target, 6 kDa          | NA   | 0.759 | 2.68E-02 |
| MSMEG_0067 | conserved hypothetical protein                   | NA   | 0.807 | 5.32E-02 |
| MSMEG_0068 | probable conserved transmembrane protein         | NA   | 0.718 | 1.94E-03 |
| MSMEG_0069 | translation initiation factor IF-2 protein       | NA   | 0.789 | 1.26E-01 |
| MSMEG_0070 | hypothetical protein                             | NA   | 0.725 | 5.97E-04 |
| MSMEG_0071 | conserved hypothetical protein                   | NA   | 0.607 | 1.22E-02 |
| MSMEG_0071 | conserved hypothetical protein                   | NA   | 0.689 | 3.01E-02 |
| MSMEG_0076 | antigen MTB48                                    | NA   | 0.934 | 4.05E-01 |
| MSMEG_0077 | hypothetical protein                             | NA   | 0.836 | 1.05E-01 |
| MSMEG_0078 | hypothetical protein                             | NA   | 0.856 | 5.94E-02 |
| MSMEG_0079 | hypothetical protein                             | NA   | 0.826 | 1.14E-02 |
| MSMEG_0080 | conserved hypothetical protein                   | NA   | 0.914 | 1.50E-01 |
| MSMEG_0081 | conserved hypothetical protein                   | NA   | 0.807 | 2.93E-02 |
| MSMEG_0082 | conserved hypothetical protein                   | NA   | 0.976 | 6.66E-01 |
| MSMEG_0083 | membrane-anchored mycosin mycp1                  | NA   | 0.962 | 1.49E-01 |
| MSMEG_0084 | phosphocarrier protein hpr                       | NA   | 0.779 | 4.98E-02 |
| MSMEG_0085 | PTS system, Fru family protein, IIABC components | NA   | 0.730 | 2.74E-02 |
| MSMEG_0086 | 1-phosphofructokinase                            | NA   | 0.807 | 1.35E-01 |
| MSMEG_0087 | glucitol operon repressor                        | NA   | 0.938 | 3.38E-01 |
| MSMEG_0088 | phosphoenolpyruvate-protein phosphotransferase   | ptsI | 0.554 | 2.11E-03 |
| MSMEG_0089 | chromosome condensation protein                  | NA   | 0.838 | 2.87E-01 |
| MSMEG_0090 | conserved hypothetical protein                   | NA   | 1.121 | 4.17E-01 |
| MSMEG_0091 | putative transcriptional regulator               | NA   | 1.352 | 1.02E-01 |
| MSMEG_0092 | probable transcriptional regulatory protein      | NA   | 0.851 | 1.49E-01 |
| MSMEG_0093 | methyltransferase                                | NA   | 1.017 | 7.11E-01 |
| MSMEG_0094 | hypothetical protein                             | NA   | 1.196 | 9.72E-03 |
| MSMEG_0095 | methyltransferase                                | NA   | 0.983 | 6.40E-01 |

|            |                                                                         |       |       |          |
|------------|-------------------------------------------------------------------------|-------|-------|----------|
| MSMEG_0096 | peroxisomal hydratase-dehydrogenase-epimerase                           | NA    | 0.880 | 1.06E-01 |
| MSMEG_0097 | oxidoreductase, zinc-binding dehydrogenase family protein               | NA    | 1.011 | 9.02E-01 |
| MSMEG_0098 | methyltransferase                                                       | NA    | 0.929 | 4.90E-02 |
| MSMEG_0099 | conserved hypothetical protein                                          | NA    | 1.142 | 3.31E-01 |
| MSMEG_0100 | phosphotyrosine protein phosphatase ptpb                                | NA    | 1.012 | 9.04E-01 |
| MSMEG_0101 | conserved hypothetical protein                                          | NA    | 1.160 | 1.66E-01 |
| MSMEG_0102 | putative acyl-CoA dehydrogenase                                         | NA    | 0.900 | 6.90E-02 |
| MSMEG_0103 | major facilitator family protein transporter                            | NA    | 1.224 | 9.77E-02 |
| MSMEG_0104 | transcriptional regulator, LysR family protein                          | NA    | 0.914 | 6.66E-01 |
| MSMEG_0105 | DNA-binding response regulator, LuxR family protein                     | NA    | 1.412 | 1.24E-01 |
| MSMEG_0106 | sensory histidine kinase                                                | NA    | 1.049 | 1.54E-01 |
| MSMEG_0107 | cell envelope-related function transcriptional attenuator common domain | NA    | 1.042 | 6.36E-02 |
| MSMEG_0108 | acyl-CoA dehydrogenase                                                  | NA    | 0.868 | 7.65E-02 |
| MSMEG_0109 | NAD(P) transhydrogenase, beta subunit                                   | pntB  | 0.885 | 1.54E-01 |
| MSMEG_0110 | NAD(P) transhydrogenase, alpha subunit                                  | pntA  | 0.918 | 1.72E-01 |
| MSMEG_0111 | putative magnesium transport protein                                    | NA    | 0.995 | 9.34E-01 |
| MSMEG_0112 | hypothetical protein                                                    | NA    | 1.138 | 3.72E-01 |
| MSMEG_0113 | taurine transport system permease protein TauC                          | NA    | 1.057 | 2.43E-01 |
| MSMEG_0114 | extracellular solute-binding protein, family protein 3                  | NA    | 0.866 | 5.81E-02 |
| MSMEG_0115 | haloacid dehalogenase, type II                                          | dehII | 1.096 | 4.55E-01 |
| MSMEG_0116 | taurine import ATP-binding protein TauB                                 | NA    | 1.079 | 6.23E-01 |
| MSMEG_0117 | hydrolase                                                               | NA    | 1.096 | 7.30E-01 |
| MSMEG_0118 | conserved hypothetical protein                                          | NA    | 0.952 | 6.28E-01 |
| MSMEG_0119 | conserved hypothetical protein                                          | NA    | 0.994 | 9.78E-01 |
| MSMEG_0120 | probable transcriptional regulatory protein                             | NA    | 1.004 | 9.36E-01 |
| MSMEG_0121 | rhamnolipids biosynthesis 3-oxoacyl-[acyl-carrier-protein] reductase    | NA    | 1.081 | 1.02E-01 |
| MSMEG_0122 | putative periplasmic solute-binding protein                             | NA    | 1.026 | 5.50E-01 |
| MSMEG_0123 | hypothetical protein                                                    | NA    | 0.755 | 2.55E-02 |
| MSMEG_0124 | transcriptional regulator, GntR family protein                          | NA    | 1.203 | 3.50E-01 |
| MSMEG_0125 | integral membrane protein                                               | NA    | 1.125 | 6.60E-01 |
| MSMEG_0126 | mandelate racemase/muconate lactonizing enzyme                          | NA    | 2.527 | 4.14E-01 |

|            |                                                            |      |       |          |
|------------|------------------------------------------------------------|------|-------|----------|
| MSMEG_0127 | oxidoreductase, zinc-binding dehydrogenase family protein  | NA   | 0.792 | 1.17E-02 |
| MSMEG_0128 | thioesterase superfamily protein                           | NA   | 0.957 | 2.63E-02 |
| MSMEG_0129 | cyclase/dehydrase family protein                           | NA   | 1.014 | 9.12E-01 |
| MSMEG_0130 | transcriptional regulator, GntR family protein             | NA   | 0.851 | 1.91E-01 |
| MSMEG_0131 | AMP-binding enzyme, putative                               | NA   | 0.625 | 5.96E-03 |
| MSMEG_0132 | conserved hypothetical protein                             | NA   | 0.820 | 9.28E-02 |
| MSMEG_0133 | ABC-transporter integral membrane protein                  | NA   | 0.764 | 1.21E-02 |
| MSMEG_0134 | virulence factor Mce family protein                        | NA   | 0.746 | 1.06E-02 |
| MSMEG_0135 | virulence factor Mce family protein                        | NA   | 0.781 | 1.07E-02 |
| MSMEG_0136 | virulence factor Mce family protein, putative              | NA   | 0.729 | 4.46E-02 |
| MSMEG_0137 | virulence factor mce family protein                        | NA   | 0.616 | 3.61E-03 |
| MSMEG_0138 | virulence factor Mce family protein                        | NA   | 0.616 | 4.76E-04 |
| MSMEG_0139 | mce-family protein mce1f                                   | NA   | 0.607 | 3.67E-03 |
| MSMEG_0140 | probable conserved mce associated membrane protein         | NA   | 0.809 | 4.71E-03 |
| MSMEG_0141 | probable conserved mce associated transmembrane protein    | NA   | 0.912 | 2.10E-01 |
| MSMEG_0142 | conserved hypothetical protein                             | NA   | 0.688 | 2.92E-04 |
| MSMEG_0143 | probable conserved mce associated membrane protein         | NA   | 0.761 | 5.28E-03 |
| MSMEG_0144 | HNH endonuclease                                           | NA   | 1.077 | 3.63E-01 |
| MSMEG_0145 | conserved hypothetical protein                             | NA   | 0.712 | 1.37E-02 |
| MSMEG_0146 | mosc domain protein                                        | NA   | 1.040 | 5.82E-01 |
| MSMEG_0147 | C-5 sterol desaturase                                      | NA   | 0.757 | 1.11E-01 |
| MSMEG_0148 | transcriptional regulator, TetR family protein             | NA   | 0.841 | 2.87E-02 |
| MSMEG_0149 | ThiC family protein                                        | NA   | 0.992 | 9.80E-01 |
| MSMEG_0150 | NAD(P) transhydrogenase beta subunit                       | NA   | 1.264 | 1.68E-01 |
| MSMEG_0151 | PntAB protein                                              | NA   | 1.019 | 8.75E-01 |
| MSMEG_0152 | Alanine dehydrogenase/pyridine nucleotide transhydrogenase | NA   | 1.265 | 2.15E-01 |
| MSMEG_0153 | 2-dehydropantoate 2-reductase                              | panE | 1.239 | 1.37E-01 |
| MSMEG_0154 | pyruvate kinase                                            | pyk  | 1.704 | 1.27E-01 |
| MSMEG_0155 | transcriptional regulator                                  | NA   | 1.194 | 1.68E-01 |
| MSMEG_0156 | transcriptional regulator, LysR family protein             | NA   | 1.149 | 1.60E-01 |
| MSMEG_0157 | oxalyl-CoA decarboxylase                                   | NA   | 1.311 | 2.27E-01 |

|            |                                                                         |      |       |          |
|------------|-------------------------------------------------------------------------|------|-------|----------|
| MSMEG_0158 | formyl-coenzyme A transferase                                           | NA   | 1.109 | 1.76E-01 |
| MSMEG_0159 | formate dehydrogenase, gamma subunit                                    | NA   | 1.133 | 2.40E-01 |
| MSMEG_0160 | formate dehydrogenase, beta subunit                                     | NA   | 1.434 | 3.53E-01 |
| MSMEG_0161 | formate dehydrogenase, alpha subunit                                    | NA   | 1.301 | 4.13E-01 |
| MSMEG_0162 | NAD-dependent formate dehydrogenase delta subunit                       | NA   | 0.969 | 8.14E-01 |
| MSMEG_0163 | conserved hypothetical protein                                          | NA   | 0.974 | 6.73E-01 |
| MSMEG_0164 | transmembrane transport protein                                         | NA   | 0.931 | 3.84E-01 |
| MSMEG_0165 | formate dehydrogenase family protein accessory protein FdhD             | fdhD | 1.439 | 4.85E-02 |
| MSMEG_0166 | GntR-family protein transcriptional regulator                           | NA   | 1.115 | 1.46E-01 |
| MSMEG_0167 | transmembrane transport protein                                         | NA   | 0.767 | 2.03E-02 |
| MSMEG_0168 | formyl-coenzyme A transferase                                           | NA   | 0.999 | 9.94E-01 |
| MSMEG_0169 | hypothetical protein                                                    | NA   | 1.740 | 1.74E-02 |
| MSMEG_0170 | transmembrane transport protein                                         | NA   | 1.059 | 5.31E-01 |
| MSMEG_0171 | histone deacetylase superfamily protein                                 | NA   | 1.321 | 2.29E-01 |
| MSMEG_0172 | probable conserved transmembrane protein, putative                      | NA   | 2.100 | 3.85E-03 |
| MSMEG_0173 | hypothetical protein                                                    | NA   | 2.035 | 1.05E-01 |
| MSMEG_0174 | putative inner membrane protein                                         | NA   | 1.487 | 1.15E-02 |
| MSMEG_0175 | FAD dependent oxidoreductase, putative                                  | NA   | 1.021 | 9.12E-01 |
| MSMEG_0176 | glutamine ABC transporter periplasmic-binding protein                   | NA   | 0.907 | 4.14E-01 |
| MSMEG_0177 | ABC polar amino acid family protein transporter, inner membrane subunit | NA   | 0.971 | 7.86E-01 |
| MSMEG_0178 | ATP-binding protein                                                     | NA   | 1.042 | 7.89E-01 |
| MSMEG_0179 | transcriptional regulator, GntR family protein                          | NA   | 0.988 | 8.49E-01 |
| MSMEG_0180 | putative HTH-type transcriptional regulator                             | NA   | 1.089 | 3.67E-01 |
| MSMEG_0181 | alpha-ketoglutarate-dependent taurine dioxygenase                       | NA   | 0.975 | 8.26E-01 |
| MSMEG_0182 | epoxide hydrolase 1                                                     | NA   | 0.869 | 4.10E-02 |
| MSMEG_0183 | conserved hypothetical protein                                          | NA   | 1.130 | 4.28E-01 |
| MSMEG_0184 | transferase                                                             | NA   | 1.139 | 7.05E-01 |
| MSMEG_0185 | MmpL6 protein                                                           | NA   | 1.023 | 9.02E-01 |
| MSMEG_0186 | MmpS2 protein                                                           | NA   | 1.513 | 1.40E-03 |
| MSMEG_0187 | acetyltransferase                                                       | NA   | 1.039 | 5.22E-01 |
| MSMEG_0188 | MarR-family protein transcriptional regulator                           | NA   | 1.238 | 1.27E-01 |

|            |                                                                                      |    |       |          |
|------------|--------------------------------------------------------------------------------------|----|-------|----------|
| MSMEG_0189 | conserved hypothetical protein                                                       | NA | 1.057 | 2.55E-01 |
| MSMEG_0190 | integral membrane transport protein                                                  | NA | 1.141 | 9.83E-02 |
| MSMEG_0191 | BadF/BadG/BcrA/BcrD ATPase family protein                                            | NA | 1.296 | 5.74E-02 |
| MSMEG_0192 | transcriptional regulator, RpiR family protein                                       | NA | 1.374 | 1.01E-01 |
| MSMEG_0193 | putative glucokinase regulator                                                       | NA | 1.275 | 1.05E-01 |
| MSMEG_0194 | serine esterase, cutinase family protein                                             | NA | 0.898 | 8.45E-02 |
| MSMEG_0195 | steroid monooxygenase                                                                | NA | 1.130 | 7.94E-01 |
| MSMEG_0196 | putative dehydrogenase                                                               | NA | 0.982 | 9.05E-01 |
| MSMEG_0197 | nudix hydrolase                                                                      | NA | 0.921 | 7.76E-01 |
| MSMEG_0198 | acyl-CoA dehydrogenase, C- domain protein                                            | NA | 1.074 | 6.73E-01 |
| MSMEG_0199 | aminoglycoside phosphotransferase; this gene contains a frame shift which is not the | NA | 0.920 | 6.52E-01 |
| MSMEG_0200 | hypothetical protein                                                                 | NA | 0.962 | 7.01E-01 |
| MSMEG_0201 | hypothetical protein                                                                 | NA | 0.978 | 6.28E-01 |
| MSMEG_0204 | hypothetical protein                                                                 | NA | 0.853 | 1.58E-01 |
| MSMEG_0205 | tetracenomycin polyketide synthesis hydroxylase TcmH                                 | NA | 0.929 | 5.17E-02 |
| MSMEG_0206 | acyltransferase 3                                                                    | NA | 1.331 | 4.79E-01 |
| MSMEG_0207 | MarR-family protein transcriptional regulator                                        | NA | 1.284 | 2.01E-02 |
| MSMEG_0208 | ribonuclease                                                                         | NA | 1.005 | 8.43E-01 |
| MSMEG_0209 | ribonuclease inhibitor                                                               | NA | 1.225 | 1.77E-01 |
| MSMEG_0210 | LprO protein                                                                         | NA | 0.979 | 7.16E-01 |
| MSMEG_0211 | ABC transporter, ATP-binding protein                                                 | NA | 1.159 | 2.71E-01 |
| MSMEG_0212 | lyase                                                                                | NA | 1.045 | 6.45E-01 |
| MSMEG_0213 | transcriptional regulator                                                            | NA | 1.015 | 7.43E-01 |
| MSMEG_0214 | L-sorbose dehydrogenase                                                              | NA | 0.959 | 7.54E-01 |
| MSMEG_0215 | YhhW family protein                                                                  | NA | 0.864 | 1.41E-02 |
| MSMEG_0216 | 3-hydroxyacyl-CoA dehydrogenase                                                      | NA | 0.872 | 1.99E-01 |
| MSMEG_0217 | alcohol dehydrogenase B                                                              | NA | 2.757 | 2.98E-01 |
| MSMEG_0218 | 3-demethylubiquinone-9 3-methyltransferase                                           | NA | 0.974 | 7.64E-01 |
| MSMEG_0219 | RNA polymerase sigma-70 factor, family protein                                       | NA | 0.744 | 3.16E-03 |
| MSMEG_0220 | monoglyceride lipase                                                                 | NA | 1.001 | 9.94E-01 |
| MSMEG_0221 | secreted protein                                                                     | NA | 0.844 | 3.99E-02 |

|            |                                                                |      |       |          |
|------------|----------------------------------------------------------------|------|-------|----------|
| MSMEG_0222 | conserved hypothetical protein                                 | NA   | 0.869 | 5.56E-02 |
| MSMEG_0223 | conserved hypothetical protein                                 | NA   | 0.989 | 9.21E-01 |
| MSMEG_0224 | O-methyltransferase MdmC                                       | NA   | 0.979 | 6.38E-01 |
| MSMEG_0225 | MmpL4 protein                                                  | NA   | 1.100 | 6.00E-02 |
| MSMEG_0226 | MmpS5 protein                                                  | NA   | 0.928 | 5.38E-02 |
| MSMEG_0227 | transcriptional regulator, TetR family protein                 | NA   | 1.001 | 9.81E-01 |
| MSMEG_0228 | adenylate and Guanylate cyclase catalytic domain protein       | NA   | 1.791 | 3.06E-01 |
| MSMEG_0229 | dihydroxy-acid dehydratase                                     | ilvD | 1.096 | 3.37E-01 |
| MSMEG_0230 | conserved hypothetical protein                                 | NA   | 1.453 | 8.82E-02 |
| MSMEG_0231 | conserved hypothetical protein                                 | NA   | 1.043 | 7.19E-01 |
| MSMEG_0232 | sugar transporter family protein                               | NA   | 1.583 | 1.63E-01 |
| MSMEG_0233 | lipoprotein Lpps                                               | NA   | 0.867 | 6.02E-02 |
| MSMEG_0234 | metallopeptidase                                               | NA   | 0.853 | 1.96E-02 |
| MSMEG_0235 | probable conserved membrane protein                            | NA   | 1.069 | 4.03E-01 |
| MSMEG_0236 | putative conserved transmembrane protein                       | NA   | 0.937 | 2.34E-01 |
| MSMEG_0238 | O-acetylhomoserine/O-acetylserine sulfhydrylase                | NA   | 0.898 | 1.06E-01 |
| MSMEG_0239 | O-acetylhomoserine/O-acetylserine sulfhydrylase                | NA   | 0.827 | 1.92E-02 |
| MSMEG_0240 | conserved hypothetical protein                                 | NA   | 0.826 | 9.05E-02 |
| MSMEG_0241 | MmpL11 protein                                                 | NA   | 0.878 | 5.05E-02 |
| MSMEG_0242 | conserved hypothetical protein                                 | NA   | 1.273 | 1.28E-02 |
| MSMEG_0243 | conserved hypothetical protein                                 | NA   | 0.966 | 6.57E-01 |
| MSMEG_0244 | two component response transcriptional regulatory protein prra | NA   | 1.242 | 2.48E-01 |
| MSMEG_0245 | probable conserved transmembrane protein                       | NA   | 1.051 | 4.47E-01 |
| MSMEG_0246 | sensor-type histidine kinase PrrB                              | NA   | 1.093 | 3.76E-01 |
| MSMEG_0247 | secreted peptidase                                             | NA   | 0.994 | 8.31E-01 |
| MSMEG_0248 | conserved hypothetical protein                                 | NA   | 0.884 | 3.67E-01 |
| MSMEG_0249 | integral membrane protein                                      | NA   | 1.156 | 1.70E-01 |
| MSMEG_0250 | membrane protein, MmpL family protein                          | NA   | 0.992 | 7.63E-01 |
| MSMEG_0251 | conserved hypothetical protein                                 | NA   | 1.008 | 8.53E-01 |
| MSMEG_0252 | tRNA (guanine-N(7)-)-methyltransferase                         | trmB | 1.000 | 9.77E-01 |
| MSMEG_0253 | conserved hypothetical protein                                 | NA   | 1.185 | 2.16E-01 |

|            |                                                                    |    |       |          |
|------------|--------------------------------------------------------------------|----|-------|----------|
| MSMEG_0254 | conserved hypothetical protein                                     | NA | 1.075 | 6.73E-01 |
| MSMEG_0255 | phosphoenolpyruvate carboxykinase                                  | NA | 0.863 | 1.05E-01 |
| MSMEG_0256 | conserved hypothetical protein                                     | NA | 0.979 | 8.09E-01 |
| MSMEG_0257 | acyl-CoA synthase                                                  | NA | 0.915 | 6.87E-01 |
| MSMEG_0258 | oxidoreductase, short chain dehydrogenase/reductase family protein | NA | 1.069 | 7.11E-01 |
| MSMEG_0259 | enoyl-CoA hydratase/isomerase                                      | NA | 0.877 | 2.87E-01 |
| MSMEG_0260 | DNA-binding protein                                                | NA | 0.922 | 2.19E-01 |
| MSMEG_0261 | p40 protein                                                        | NA | 1.137 | 4.10E-01 |
| MSMEG_0262 | conserved hypothetical protein                                     | NA | 1.113 | 2.87E-01 |
| MSMEG_0263 | amidohydrolase 3                                                   | NA | 0.901 | 3.96E-01 |
| MSMEG_0264 | transmembrane transport protein                                    | NA | 0.937 | 7.10E-01 |
| MSMEG_0265 | uracil DNA glycosylase superfamily protein                         | NA | 1.014 | 9.14E-01 |
| MSMEG_0266 | arginine decarboxylase                                             | NA | 1.387 | 4.62E-01 |
| MSMEG_0267 | esterase                                                           | NA | 1.479 | 3.81E-01 |
| MSMEG_0268 | transcriptional regulator, GntR family protein                     | NA | 1.051 | 4.16E-01 |
| MSMEG_0269 | 3-oxoacyl-[acyl-carrier-protein] reductase                         | NA | 0.793 | 1.60E-02 |
| MSMEG_0270 | aminoglycoside phosphotransferase                                  | NA | 1.021 | 9.19E-01 |
| MSMEG_0271 | conserved hypothetical protein                                     | NA | 1.938 | 3.73E-01 |
| MSMEG_0272 | propanediol utilization protein PduA                               | NA | 0.904 | 2.44E-01 |
| MSMEG_0273 | ethanolamine utilization protein EutN                              | NA | 1.584 | 3.73E-01 |
| MSMEG_0274 | hypothetical protein                                               | NA | 1.081 | 7.19E-01 |
| MSMEG_0275 | bacterial microcompartments protein family protein                 | NA | 1.257 | 3.66E-01 |
| MSMEG_0276 | aldehyde-alcohol dehydrogenase                                     | NA | 1.028 | 8.11E-01 |
| MSMEG_0277 | putative aminotransferase                                          | NA | 1.073 | 5.80E-01 |
| MSMEG_0278 | hypothetical protein                                               | NA | 0.982 | 7.73E-01 |
| MSMEG_0279 | amino acid permease                                                | NA | 1.035 | 6.75E-01 |
| MSMEG_0280 | alpha/beta hydrolase fold                                          | NA | 0.807 | 3.17E-02 |
| MSMEG_0281 | choline dehydrogenase                                              | NA | 0.866 | 7.50E-02 |
| MSMEG_0282 | conserved hypothetical protein                                     | NA | 0.899 | 4.17E-02 |
| MSMEG_0283 | 3-oxoacyl-[acyl-carrier-protein] reductase                         | NA | 1.180 | 2.36E-01 |
| MSMEG_0284 | ribosylidihyronicotinamide dehydrogenase (quinone)                 | NA | 1.076 | 2.89E-01 |



|            |                                                                                      |      |        |          |
|------------|--------------------------------------------------------------------------------------|------|--------|----------|
| MSMEG_0285 | transcriptional regulator TetR family protein                                        | NA   | 1.843  | 2.64E-01 |
| MSMEG_0286 | GntR-family protein transcriptional regulator                                        | NA   | 0.893  | 5.47E-01 |
| MSMEG_0287 | conserved hypothetical protein                                                       | NA   | 1.206  | 1.36E-01 |
| MSMEG_0288 | FAD dependent oxidoreductase, putative                                               | NA   | 1.378  | 1.69E-01 |
| MSMEG_0289 | alpha/beta hydrolase fold family protein                                             | NA   | 0.823  | 2.53E-02 |
| MSMEG_0290 | acyltransferase, ws/dgat/mgat subfamily protein                                      | NA   | 0.787  | 3.02E-03 |
| MSMEG_0291 | dioxygenase, TauD/TfdA family protein                                                | NA   | 0.822  | 1.88E-01 |
| MSMEG_0292 | conserved hypothetical protein                                                       | NA   | 1.806  | 3.60E-01 |
| MSMEG_0293 | Rieske [2Fe-2S] domain protein                                                       | NA   | 0.980  | 4.46E-01 |
| MSMEG_0294 | 3-oxoacyl-(acyl-carrier-protein) reductase                                           | fabG | 2.948  | 4.10E-01 |
| MSMEG_0295 | oxidoreductase, FAD-binding                                                          | NA   | 17.440 | 3.92E-01 |
| MSMEG_0296 | transcriptional regulator, MarR family protein                                       | NA   | 1.121  | 6.03E-01 |
| MSMEG_0297 | amidohydrolase                                                                       | NA   | 0.999  | 9.95E-01 |
| MSMEG_0298 | conserved hypothetical protein                                                       | NA   | 2.045  | 4.11E-01 |
| MSMEG_0299 | Rieske [2Fe-2S] domain protein                                                       | NA   | 0.914  | 3.70E-01 |
| MSMEG_0300 | amidohydrolase family protein                                                        | NA   | 1.051  | 8.29E-01 |
| MSMEG_0301 | oxidoreductase, FAD-binding                                                          | NA   | 0.955  | 6.78E-01 |
| MSMEG_0302 | peptidase, S9A/B/C families                                                          | NA   | 2.187  | 3.24E-01 |
| MSMEG_0303 | alcohol dehydrogenase, zinc-containing                                               | NA   | 1.308  | 8.95E-02 |
| MSMEG_0304 | acyl-CoA synthase                                                                    | NA   | 1.137  | 5.16E-03 |
| MSMEG_0305 | acyltransferase domain protein                                                       | NA   | 0.968  | 7.04E-01 |
| MSMEG_0306 | arylamine N-acetyltransferase                                                        | NA   | 1.511  | 3.89E-01 |
| MSMEG_0307 | transcriptional regulator, AraC family protein                                       | NA   | 1.649  | 7.06E-03 |
| MSMEG_0308 | dihydrofolate reductase                                                              | NA   | 1.314  | 2.38E-02 |
| MSMEG_0309 | aldehyde dehydrogenase family protein                                                | NA   | 0.899  | 1.71E-02 |
| MSMEG_0310 | SAM-dependent methyltransferase; this gene contains a frame shift which is not the r | NA   | 1.010  | 8.87E-01 |
| MSMEG_0311 | glycosyltransferase                                                                  | NA   | 1.172  | 4.43E-02 |
| MSMEG_0312 | 2-dehydro-3-deoxyphosphogluconate aldolase/4-hydroxy-2-oxoglutarate aldolase         | eda  | 1.277  | 1.27E-01 |
| MSMEG_0313 | phosphogluconate dehydratase                                                         | edd  | 1.070  | 5.84E-01 |
| MSMEG_0314 | glucose-6-phosphate 1-dehydrogenase                                                  | zwf  | 1.069  | 4.24E-01 |
| MSMEG_0315 | probable conserved transmembrane protein                                             | NA   | 1.004  | 9.47E-01 |

|            |                                                                                            |    |       |          |
|------------|--------------------------------------------------------------------------------------------|----|-------|----------|
| MSMEG_0316 | putative NagC regulator                                                                    | NA | 1.146 | 8.07E-03 |
| MSMEG_0317 | conserved hypothetical protein                                                             | NA | 0.832 | 1.00E-02 |
| MSMEG_0318 | AMP-dependent synthetase and ligase                                                        | NA | 1.063 | 4.88E-01 |
| MSMEG_0319 | acyltransferase                                                                            | NA | 1.190 | 2.21E-01 |
| MSMEG_0320 | putative phosphotriesterase                                                                | NA | 1.354 | 2.19E-01 |
| MSMEG_0321 | transcriptional regulator                                                                  | NA | 0.993 | 9.16E-01 |
| MSMEG_0322 | glyoxylase family protein; this gene contains a frame shift which is not the result of sec | NA | 2.997 | 4.26E-01 |
| MSMEG_0323 | acyl-CoA dehydrogenase, short-chain specific, putative                                     | NA | 1.943 | 3.26E-01 |
| MSMEG_0324 | conserved hypothetical protein                                                             | NA | 0.792 | 2.15E-02 |
| MSMEG_0325 | conserved hypothetical protein                                                             | NA | 0.934 | 7.90E-01 |
| MSMEG_0326 | AMP-dependent synthetase and ligase                                                        | NA | 1.075 | 5.19E-01 |
| MSMEG_0327 | aldehyde dehydrogenase                                                                     | NA | 1.338 | 4.39E-01 |
| MSMEG_0328 | hypothetical protein                                                                       | NA | 1.007 | 9.61E-01 |
| MSMEG_0329 | FMN oxidoreductase                                                                         | NA | 1.351 | 6.55E-02 |
| MSMEG_0330 | transcriptional regulator, LuxR family protein                                             | NA | 0.670 | 1.04E-01 |
| MSMEG_0331 | transcriptional regulator, LuxR family protein                                             | NA | 0.665 | 7.78E-02 |
| MSMEG_0332 | 2-nitropropane dioxygenase, NPD                                                            | NA | 1.104 | 4.96E-01 |
| MSMEG_0333 | Carboxyl transferase domain protein                                                        | NA | 1.049 | 5.01E-01 |
| MSMEG_0334 | acetyl-/propionyl-coenzyme A carboxylase alpha chain                                       | NA | 1.143 | 3.86E-01 |
| MSMEG_0335 | enoyl-CoA hydratase/isomerase                                                              | NA | 1.119 | 4.09E-01 |
| MSMEG_0336 | conserved hypothetical protein                                                             | NA | 1.104 | 6.60E-01 |
| MSMEG_0337 | conserved hypothetical protein                                                             | NA | 1.097 | 7.44E-01 |
| MSMEG_0338 | acyl-CoA dehydrogenase fadE12                                                              | NA | 0.948 | 5.72E-01 |
| MSMEG_0339 | FMN-dependent monooxygenase                                                                | NA | 1.493 | 4.46E-01 |
| MSMEG_0340 | enoyl-CoA hydratase/isomerase family protein                                               | NA | 1.112 | 5.45E-01 |
| MSMEG_0341 | conserved hypothetical protein                                                             | NA | 1.128 | 2.35E-02 |
| MSMEG_0342 | hypothetical protein                                                                       | NA | 1.012 | 8.39E-01 |
| MSMEG_0343 | TetR-family protein transcriptional regulator                                              | NA | 0.904 | 2.80E-01 |
| MSMEG_0344 | conserved hypothetical protein                                                             | NA | 1.233 | 1.57E-01 |
| MSMEG_0345 | conserved hypothetical protein                                                             | NA | 3.096 | 4.16E-01 |
| MSMEG_0346 | virulence factor                                                                           | NA | 1.253 | 3.18E-01 |

|            |                                                                    |    |       |          |
|------------|--------------------------------------------------------------------|----|-------|----------|
| MSMEG_0347 | virulence factor Mce family protein                                | NA | 0.931 | 5.48E-01 |
| MSMEG_0348 | mce-family protein mce3c                                           | NA | 1.092 | 3.81E-01 |
| MSMEG_0349 | virulence factor mce family protein                                | NA | 0.961 | 2.10E-01 |
| MSMEG_0350 | virulence factor Mce family protein                                | NA | 0.677 | 1.24E-02 |
| MSMEG_0351 | virulence factor mce family protein                                | NA | 0.978 | 8.80E-01 |
| MSMEG_0352 | conserved hypothetical protein                                     | NA | 0.750 | 6.35E-03 |
| MSMEG_0353 | conserved hypothetical protein                                     | NA | 0.843 | 1.57E-01 |
| MSMEG_0354 | conserved hypothetical protein                                     | NA | 0.951 | 8.32E-01 |
| MSMEG_0355 | conserved hypothetical protein                                     | NA | 0.843 | 1.86E-02 |
| MSMEG_0356 | acetyltransferase                                                  | NA | 0.841 | 9.30E-02 |
| MSMEG_0357 | transmembrane transport protein                                    | NA | 1.831 | 4.25E-01 |
| MSMEG_0358 | ribonucleoside-diphosphate reductase, beta subunit                 | NA | 0.797 | 1.93E-01 |
| MSMEG_0359 | conserved hypothetical protein                                     | NA | 1.056 | 5.00E-01 |
| MSMEG_0360 | conserved hypothetical protein                                     | NA | 1.129 | 5.10E-01 |
| MSMEG_0361 | Glycosyl hydrolase family protein 3                                | NA | 1.093 | 6.55E-01 |
| MSMEG_0362 | amidohydrolase 2                                                   | NA | 1.035 | 6.66E-01 |
| MSMEG_0363 | TetR-family protein regulatory protein                             | NA | 1.151 | 4.20E-01 |
| MSMEG_0364 | hypothetical protein                                               | NA | 1.034 | 4.47E-01 |
| MSMEG_0365 | conserved hypothetical protein                                     | NA | 0.729 | 1.38E-04 |
| MSMEG_0366 | hypothetical protein                                               | NA | 0.785 | 2.25E-03 |
| MSMEG_0367 | O-demethylpuromycin-O-methyltransferase                            | NA | 1.059 | 7.91E-01 |
| MSMEG_0368 | hypothetical protein                                               | NA | 1.163 | 3.14E-03 |
| MSMEG_0369 | hypothetical protein                                               | NA | 1.053 | 4.11E-01 |
| MSMEG_0370 | conserved hypothetical protein                                     | NA | 1.191 | 7.84E-02 |
| MSMEG_0371 | MaoC like domain protein                                           | NA | 1.038 | 7.41E-01 |
| MSMEG_0372 | oxidoreductase, short chain dehydrogenase/reductase family protein | NA | 1.171 | 1.89E-01 |
| MSMEG_0373 | 3-ketoacyl-CoA thiolase                                            | NA | 1.017 | 8.16E-01 |
| MSMEG_0374 | glycolate oxidase subunit                                          | NA | 1.165 | 6.30E-01 |
| MSMEG_0375 | phospholipase D family protein                                     | NA | 0.923 | 4.72E-01 |
| MSMEG_0376 | transcriptional regulator, AraC family protein                     | NA | 0.728 | 8.90E-04 |
| MSMEG_0377 | nitrile hydratase                                                  | NA | 1.339 | 2.30E-03 |

|            |                                                    |      |       |          |
|------------|----------------------------------------------------|------|-------|----------|
| MSMEG_0378 | nitrile hydratase, alpha subunit                   | nthA | 1.304 | 5.49E-02 |
| MSMEG_0379 | nitrile hydratase activator P14k                   | NA   | 1.247 | 3.98E-01 |
| MSMEG_0380 | MmpS4 protein                                      | NA   | 0.774 | 9.23E-04 |
| MSMEG_0381 | Mmp14a protein                                     | NA   | 0.725 | 4.27E-03 |
| MSMEG_0382 | putative transport protein                         | NA   | 0.692 | 2.18E-02 |
| MSMEG_0383 | conserved hypothetical protein                     | NA   | 1.105 | 3.36E-01 |
| MSMEG_0384 | glucose-1-phosphate thymidyltransferase            | rfbA | 0.833 | 1.30E-02 |
| MSMEG_0385 | hypothetical glycosyl transferase                  | NA   | 1.192 | 3.21E-01 |
| MSMEG_0386 | NAD dependent epimerase/dehydratase family protein | NA   | 0.953 | 4.24E-02 |
| MSMEG_0387 | Rmt2 protein                                       | NA   | 0.884 | 1.85E-01 |
| MSMEG_0388 | Macrocin-O-methyltransferase                       | tylF | 0.778 | 1.37E-03 |
| MSMEG_0389 | hypothetical glycosyl transferase                  | NA   | 0.770 | 7.55E-03 |
| MSMEG_0390 | putative acyltransferase                           | NA   | 0.796 | 4.96E-02 |
| MSMEG_0391 | Rmt3 protein                                       | NA   | 0.999 | 9.74E-01 |
| MSMEG_0392 | hypothetical glycosyl transferase                  | NA   | 1.032 | 3.91E-01 |
| MSMEG_0393 | Fmt protein                                        | NA   | 1.039 | 7.39E-01 |
| MSMEG_0394 | hypothetical protein                               | NA   | 1.108 | 6.88E-01 |
| MSMEG_0395 | hypothetical protein                               | NA   | 1.085 | 6.51E-01 |
| MSMEG_0396 | hypothetical protein                               | NA   | 1.100 | 1.41E-01 |
| MSMEG_0399 | conserved domain protein                           | NA   | 0.979 | 7.94E-01 |
| MSMEG_0400 | peptide synthetase                                 | NA   | 0.989 | 7.63E-01 |
| MSMEG_0401 | putative non-ribosomal peptide synthase            | NA   | 0.836 | 4.70E-01 |
| MSMEG_0402 | linear gramicidin synthetase subunit D             | NA   | 0.618 | 6.36E-04 |
| MSMEG_0403 | integral membrane protein                          | NA   | 0.683 | 2.88E-03 |
| MSMEG_0404 | sigma associated protein                           | NA   | 0.826 | 4.56E-02 |
| MSMEG_0405 | extra cytoplasmic sigma factor                     | NA   | 0.935 | 1.04E-02 |
| MSMEG_0406 | acyl-coA-dehydrogenase                             | NA   | 0.719 | 4.00E-02 |
| MSMEG_0407 | conserved hypothetical protein                     | NA   | 0.894 | 4.45E-01 |
| MSMEG_0408 | type I modular polyketide synthase                 | NA   | 0.695 | 2.45E-03 |
| MSMEG_0409 | Condensation domain protein                        | NA   | 0.723 | 2.98E-03 |
| MSMEG_0410 | MmpL protein                                       | NA   | 0.599 | 2.76E-03 |

|            |                                                     |      |       |          |
|------------|-----------------------------------------------------|------|-------|----------|
| MSMEG_0411 | acyl-CoA synthase                                   | NA   | 0.683 | 3.11E-03 |
| MSMEG_0412 | conserved hypothetical protein                      | NA   | 0.677 | 3.11E-04 |
| MSMEG_0413 | conserved hypothetical protein                      | NA   | 1.142 | 2.30E-01 |
| MSMEG_0414 | oxidoreductase, 2OG-Fe(II) oxygenase family protein | NA   | 0.935 | 4.45E-01 |
| MSMEG_0415 | NADH-fmn oxidoreductase                             | NA   | 1.050 | 4.61E-01 |
| MSMEG_0416 | hypothetical protein                                | NA   | 0.933 | 5.14E-01 |
| MSMEG_0417 | succinate dehydrogenase                             | NA   | 0.878 | 4.40E-01 |
| MSMEG_0418 | succinate dehydrogenase flavoprotein subunit        | NA   | 0.665 | 1.13E-03 |
| MSMEG_0419 | integral membrane protein                           | NA   | 0.891 | 6.94E-01 |
| MSMEG_0420 | conserved hypothetical protein                      | NA   | 0.784 | 3.93E-01 |
| MSMEG_0421 | hypothetical protein                                | NA   | 1.592 | 3.58E-01 |
| MSMEG_0422 | transferase                                         | NA   | 1.318 | 6.50E-02 |
| MSMEG_0423 | conserved hypothetical protein                      | NA   | 1.353 | 2.18E-01 |
| MSMEG_0424 | Hsp20/alpha crystallin family protein               | NA   | 1.156 | 9.81E-02 |
| MSMEG_0425 | putative membrane protein DcsA                      | NA   | 1.668 | 3.13E-01 |
| MSMEG_0426 | transcriptional regulator, GntR family protein      | NA   | 2.241 | 2.77E-01 |
| MSMEG_0427 | nitrite reductase [NAD(P)H], large subunit          | nirB | 0.880 | 7.79E-02 |
| MSMEG_0428 | nitrite reductase [NAD(P)H] small subunit           | NA   | 1.473 | 4.36E-01 |
| MSMEG_0429 | putative ferric uptake regulator                    | NA   | 1.333 | 2.37E-01 |
| MSMEG_0431 | secreted protein                                    | NA   | 1.302 | 9.58E-02 |
| MSMEG_0432 | uroporphyrinogen-III synthetase                     | NA   | 1.241 | 1.72E-01 |
| MSMEG_0433 | nitrite extrusion protein                           | NA   | 1.146 | 3.89E-01 |
| MSMEG_0434 | aminoglycoside 2'-N-acetyltransferase (AAC(2')-Id)  | NA   | 1.100 | 2.96E-01 |
| MSMEG_0435 | allophanate hydrolase subunit 2                     | NA   | 0.895 | 4.86E-01 |
| MSMEG_0436 | allophanate hydrolase subunit 1                     | NA   | 0.974 | 8.72E-01 |
| MSMEG_0437 | conserved hypothetical integral membrane protein    | NA   | 1.111 | 1.03E-01 |
| MSMEG_0438 | Periplasmic binding protein                         | NA   | 0.750 | 5.37E-03 |
| MSMEG_0439 | conserved hypothetical protein                      | NA   | 1.492 | 1.46E-01 |
| MSMEG_0440 | hypothetical protein                                | NA   | 0.929 | 1.72E-01 |
| MSMEG_0441 | conserved hypothetical protein, putative            | NA   | 0.785 | 8.53E-03 |
| MSMEG_0442 | tetracyclin repressor, C- all-alpha domain protein  | NA   | 1.121 | 3.94E-01 |

|            |                                                         |      |       |          |
|------------|---------------------------------------------------------|------|-------|----------|
| MSMEG_0443 | hydrolase, carbon-nitrogen family protein               | NA   | 0.763 | 6.77E-02 |
| MSMEG_0444 | agmatine deiminase                                      | NA   | 0.747 | 5.15E-02 |
| MSMEG_0445 | amidohydrolase family protein                           | NA   | 0.972 | 2.95E-01 |
| MSMEG_0446 | putrescine importer                                     | NA   | 1.047 | 5.26E-01 |
| MSMEG_0447 | conserved hypothetical protein                          | NA   | 1.605 | 7.29E-02 |
| MSMEG_0448 | transcriptional regulator, MarR family protein          | NA   | 1.165 | 1.13E-01 |
| MSMEG_0449 | transporter, major facilitator family protein, putative | NA   | 4.530 | 1.52E-01 |
| MSMEG_0450 | hypothetical protein                                    | NA   | 1.590 | 3.83E-01 |
| MSMEG_0451 | oxidoreductase, FAD-linked                              | NA   | 1.352 | 4.79E-01 |
| MSMEG_0452 | inner membrane permease YgbN                            | NA   | 0.627 | 1.99E-02 |
| MSMEG_0453 | shikimate kinase                                        | aroK | 0.737 | 9.31E-02 |
| MSMEG_0454 | GntR-family protein transcriptional regulator           | NA   | 1.300 | 1.19E-01 |
| MSMEG_0455 | aldehyde dehydrogenase                                  | NA   | 0.975 | 6.99E-01 |
| MSMEG_0456 | DNA gyrase subunit A                                    | NA   | 1.341 | 8.08E-02 |
| MSMEG_0457 | DNA topoisomerase IV subunit B                          | NA   | 1.360 | 7.05E-03 |
| MSMEG_0458 | two-component system sensor kinase                      | NA   | 1.065 | 4.87E-01 |
| MSMEG_0459 | two-component system response regulator                 | NA   | 0.903 | 1.82E-01 |
| MSMEG_0460 | alpha/beta hydrolase fold                               | NA   | 1.520 | 3.69E-01 |
| MSMEG_0461 | CinZ protein                                            | NA   | 1.225 | 3.80E-01 |
| MSMEG_0462 | MmpS4 protein                                           | NA   | 1.349 | 3.86E-01 |
| MSMEG_0463 | MmpL4 protein                                           | NA   | 1.724 | 1.21E-01 |
| MSMEG_0464 | phosphomethylpyrimidine kinase                          | NA   | 1.024 | 4.82E-01 |
| MSMEG_0465 | transcriptional regulator, TetR family protein          | NA   | 0.963 | 3.36E-01 |
| MSMEG_0466 | hypothetical protein                                    | NA   | 1.009 | 8.99E-01 |
| MSMEG_0467 | membrane transport protein                              | NA   | 0.351 | 2.23E-04 |
| MSMEG_0468 | integral membrane protein                               | NA   | 1.001 | 9.92E-01 |
| MSMEG_0469 | transcriptional regulatory protein PadR-                | NA   | 1.211 | 5.20E-01 |
| MSMEG_0470 | para-nitrobenzyl esterase                               | NA   | 0.870 | 5.64E-01 |
| MSMEG_0471 | transcriptional regulator LysR family protein           | NA   | 1.021 | 7.27E-01 |
| MSMEG_0472 | putative lipoprotein                                    | NA   | 0.914 | 9.00E-02 |
| MSMEG_0473 | transcriptional regulator, LuxR family protein          | NA   | 1.767 | 3.21E-02 |

|            |                                                                                         |    |       |          |
|------------|-----------------------------------------------------------------------------------------|----|-------|----------|
| MSMEG_0474 | glucosamine--fructose-6-phosphate aminotransferase (isomerizing)                        | NA | 1.425 | 3.18E-01 |
| MSMEG_0475 | nucleotide-sugar dehydrogenase                                                          | NA | 1.204 | 1.82E-01 |
| MSMEG_0476 | chitin synthase                                                                         | NA | 1.629 | 1.22E-01 |
| MSMEG_0477 | hypothetical protein                                                                    | NA | 1.629 | 2.42E-01 |
| MSMEG_0478 | secreted protein, putative                                                              | NA | 1.328 | 2.32E-01 |
| MSMEG_0479 | hypothetical protein                                                                    | NA | 1.033 | 8.46E-01 |
| MSMEG_0480 | transcriptional regulator, GntR family protein                                          | NA | 1.157 | 2.12E-01 |
| MSMEG_0481 | FAD dependent oxidoreductase                                                            | NA | 1.015 | 9.29E-01 |
| MSMEG_0482 | dihydroxy-acid dehydratase                                                              | NA | 1.544 | 9.24E-02 |
| MSMEG_0483 | shikimate transporter                                                                   | NA | 1.337 | 1.53E-01 |
| MSMEG_0484 | formamidase                                                                             | NA | 0.930 | 2.93E-01 |
| MSMEG_0485 | amidase                                                                                 | NA | 1.288 | 4.94E-01 |
| MSMEG_0486 | putative ABC transporter, periplasmic protein                                           | NA | 2.718 | 3.99E-01 |
| MSMEG_0487 | ABC transporter permease                                                                | NA | 1.478 | 3.94E-01 |
| MSMEG_0488 | ABC transporter ATP-binding protein                                                     | NA | 1.091 | 5.91E-01 |
| MSMEG_0489 | racemase                                                                                | NA | 1.940 | 5.78E-02 |
| MSMEG_0490 | enoyl-CoA hydratase                                                                     | NA | 1.243 | 1.37E-01 |
| MSMEG_0491 | transcriptional regulator, LacI family protein                                          | NA | 1.218 | 2.13E-02 |
| MSMEG_0492 | conserved hypothetical protein                                                          | NA | 1.164 | 1.90E-02 |
| MSMEG_0493 | hypothetical protein                                                                    | NA | 1.701 | 3.49E-03 |
| MSMEG_0494 | hypothetical protein                                                                    | NA | 1.723 | 2.68E-03 |
| MSMEG_0495 | glycerol dehydratase reactivase chain A, putative; this gene contains a frame shift whi | NA | 1.092 | 4.98E-01 |
| MSMEG_0496 | coenzyme B12-dependent glycerol dehydrogenase small subunit                             | NA | 0.939 | 6.19E-01 |
| MSMEG_0497 | glycerol dehydratase large subunit                                                      | NA | 0.959 | 6.89E-01 |
| MSMEG_0498 | hypothetical protein                                                                    | NA | 1.074 | 1.79E-01 |
| MSMEG_0499 | amino acid permease-associated region                                                   | NA | 2.101 | 4.60E-01 |
| MSMEG_0500 | regulator of polyketide synthase expression, putative                                   | NA | 1.198 | 6.68E-02 |
| MSMEG_0501 | glucosamine-6-phosphate deaminase 1                                                     | NA | 0.758 | 1.78E-01 |
| MSMEG_0502 | glucosidase                                                                             | NA | 0.920 | 6.21E-01 |
| MSMEG_0503 | DeoR-family protein transcriptional regulator                                           | NA | 0.897 | 2.33E-01 |
| MSMEG_0504 | carbohydrate kinase                                                                     | NA | 1.284 | 2.21E-01 |

|            |                                                                                          |    |       |          |
|------------|------------------------------------------------------------------------------------------|----|-------|----------|
| MSMEG_0505 | probable sugar ABC transporter, substrate-binding protein, putative                      | NA | 0.794 | 1.93E-02 |
| MSMEG_0506 | ABC transporter, permease protein                                                        | NA | 0.749 | 7.78E-02 |
| MSMEG_0507 | probable sugar ABC transporter, permease protein                                         | NA | 1.002 | 9.93E-01 |
| MSMEG_0508 | glycerol-phosphate porter                                                                | NA | 0.855 | 5.31E-01 |
| MSMEG_0509 | transcriptional regulatory protein                                                       | NA | 1.087 | 3.39E-01 |
| MSMEG_0510 | D-tagatose-bisphosphate aldolase, class II, non-catalytic subunit                        | NA | 1.666 | 5.19E-03 |
| MSMEG_0511 | putative sugar isomerase, AgaS family protein                                            | NA | 0.907 | 1.98E-01 |
| MSMEG_0512 | BadF/BadG/BcrA/BcrD ATPase family protein                                                | NA | 0.945 | 2.64E-01 |
| MSMEG_0513 | integral membrane protein                                                                | NA | 0.986 | 8.67E-01 |
| MSMEG_0514 | alpha-galactosidase                                                                      | NA | 0.820 | 1.32E-01 |
| MSMEG_0515 | probable sugar transporter sugar binding lipoprotein                                     | NA | 1.753 | 1.14E-01 |
| MSMEG_0516 | sugar transport system                                                                   | NA | 1.214 | 3.51E-01 |
| MSMEG_0517 | sugar binding-protein dependent transporter system permease                              | NA | 0.984 | 7.60E-01 |
| MSMEG_0518 | ABC transporter, nucleotide binding/ATPase protein, sn-Glycerol-3-phosphate              | NA | 1.164 | 5.52E-01 |
| MSMEG_0519 | conserved hypothetical protein                                                           | NA | 0.856 | 1.34E-01 |
| MSMEG_0520 | porin                                                                                    | NA | 0.916 | 8.10E-03 |
| MSMEG_0521 | conserved hypothetical protein; this gene contains a frame shift which is not the result | NA | 1.022 | 8.85E-01 |
| MSMEG_0521 | conserved hypothetical protein; this gene contains a frame shift which is not the result | NA | 1.266 | 7.38E-03 |
| MSMEG_0522 | pp24 protein                                                                             | NA | 1.125 | 7.04E-01 |
| MSMEG_0523 | DNA-binding protein                                                                      | NA | 1.079 | 5.36E-01 |
| MSMEG_0524 | short chain dehydrogenase                                                                | NA | 1.272 | 5.36E-01 |
| MSMEG_0525 | hypothetical protein                                                                     | NA | 1.064 | 3.33E-01 |
| MSMEG_0526 | oxidoreductase, GMC family protein                                                       | NA | 1.099 | 4.65E-01 |
| MSMEG_0527 | 2-hydroxycyclohexanecarboxyl-CoA dehydrogenase                                           | NA | 1.509 | 3.89E-01 |
| MSMEG_0528 | conserved hypothetical protein                                                           | NA | 1.100 | 5.95E-01 |
| MSMEG_0529 | probable serine/threonine-protein kinase PknK                                            | NA | 1.169 | 3.17E-01 |
| MSMEG_0530 | short chain dehydrogenase                                                                | NA | 1.039 | 7.59E-01 |
| MSMEG_0531 | putative acyl-CoA dehydrogenase                                                          | NA | 0.831 | 6.45E-02 |
| MSMEG_0532 | transcriptional regulator, TetR family protein                                           | NA | 0.781 | 9.46E-03 |
| MSMEG_0533 | gp236 protein                                                                            | NA | 1.216 | 6.77E-02 |
| MSMEG_0534 | permease, major facilitator family protein                                               | NA | 1.303 | 6.89E-02 |



|            |                                                                     |      |       |          |
|------------|---------------------------------------------------------------------|------|-------|----------|
| MSMEG_0535 | GntR-family protein transcriptional regulator                       | NA   | 1.238 | 2.75E-01 |
| MSMEG_0536 | intracellular protease, Pfpl family protein                         | NA   | 1.179 | 3.48E-01 |
| MSMEG_0537 | conserved hypothetical protein                                      | NA   | 0.964 | 6.91E-01 |
| MSMEG_0537 | conserved hypothetical protein                                      | NA   | 1.052 | 6.13E-01 |
| MSMEG_0538 | regulatory protein, MarR                                            | NA   | 1.123 | 2.82E-01 |
| MSMEG_0539 | transcriptional regulator, Crp/Fnr family protein                   | NA   | 0.676 | 2.16E-02 |
| MSMEG_0540 | transcriptional regulator, putative                                 | NA   | 1.079 | 3.05E-01 |
| MSMEG_0541 | hypothetical protein                                                | NA   | 0.984 | 6.18E-01 |
| MSMEG_0542 | antar domain protein                                                | NA   | 1.142 | 3.40E-02 |
| MSMEG_0543 | conserved hypothetical protein                                      | NA   | 1.047 | 4.71E-01 |
| MSMEG_0544 | transcriptional regulator                                           | NA   | 1.218 | 1.27E-01 |
| MSMEG_0545 | transcriptional regulator, LuxR family protein                      | NA   | 1.319 | 1.77E-01 |
| MSMEG_0546 | conserved hypothetical protein                                      | NA   | 1.357 | 5.32E-02 |
| MSMEG_0547 | ISMsm5, transposase                                                 | NA   | 0.941 | 2.36E-01 |
| MSMEG_0548 | chromosome replication initiation inhibitor protein                 | NA   | 1.358 | 2.38E-03 |
| MSMEG_0549 | ABC transporter, permease protein                                   | NA   | 1.106 | 4.79E-01 |
| MSMEG_0550 | sulfonate binding protein                                           | NA   | 1.020 | 8.35E-01 |
| MSMEG_0551 | ABC nitrate/sulfonate/bicarbonate transporter, ATPase subunit       | NA   | 1.064 | 4.76E-01 |
| MSMEG_0552 | conserved hypothetical protein                                      | NA   | 1.370 | 2.08E-02 |
| MSMEG_0553 | probable sugar ABC transporter, substrate-binding protein, putative | NA   | 1.106 | 5.51E-01 |
| MSMEG_0554 | ABC transporter permease protein, putative                          | NA   | 1.200 | 7.51E-02 |
| MSMEG_0555 | ABC transporter permease protein                                    | NA   | 1.270 | 3.05E-01 |
| MSMEG_0556 | ABC transporter, nucleotide binding/ATPase protein                  | NA   | 1.089 | 6.29E-01 |
| MSMEG_0557 | hypothetical protein                                                | NA   | 1.060 | 4.43E-01 |
| MSMEG_0558 | conserved hypothetical protein                                      | NA   | 1.102 | 3.00E-01 |
| MSMEG_0559 | conserved domain protein                                            | NA   | 1.169 | 6.18E-01 |
| MSMEG_0560 | dihydrodipicolinate reductase, N-terminus domain protein            | dapB | 0.753 | 2.84E-01 |
| MSMEG_0561 | putative TetR family protein receptor protein                       | NA   | 1.187 | 1.15E-01 |
| MSMEG_0562 | conserved hypothetical protein                                      | NA   | 1.184 | 9.79E-02 |
| MSMEG_0563 | hypothetical protein                                                | NA   | 0.936 | 4.75E-01 |
| MSMEG_0564 | xanthine/uracil permease                                            | NA   | 1.350 | 1.65E-01 |

|            |                                                               |      |       |          |
|------------|---------------------------------------------------------------|------|-------|----------|
| MSMEG_0565 | putative glycosyl transferases group 1                        | NA   | 0.860 | 3.91E-01 |
| MSMEG_0566 | aliphatic amidase                                             | NA   | 0.889 | 5.44E-01 |
| MSMEG_0567 | selenophosphate synthetase                                    | NA   | 1.070 | 7.52E-01 |
| MSMEG_0568 | radical SAM domain protein                                    | NA   | 1.197 | 3.96E-01 |
| MSMEG_0569 | flavoprotein involved in K <sup>+</sup> transport             | NA   | 0.976 | 8.91E-01 |
| MSMEG_0570 | conserved hypothetical protein                                | NA   | 1.196 | 6.89E-02 |
| MSMEG_0571 | hydrolase, carbon-nitrogen family protein                     | NA   | 1.440 | 4.58E-01 |
| MSMEG_0572 | conserved hypothetical protein                                | NA   | 1.641 | 3.10E-01 |
| MSMEG_0573 | putative ECF sigma factor RpoE1                               | NA   | 1.172 | 6.52E-02 |
| MSMEG_0574 | putative ECF sigma factor RpoE1                               | NA   | 3.949 | 3.88E-01 |
| MSMEG_0575 | MmpS1 protein                                                 | NA   | 1.281 | 2.21E-01 |
| MSMEG_0576 | MmpL4 protein                                                 | NA   | 1.997 | 3.83E-02 |
| MSMEG_0577 | major facilitator superfamily protein, putative               | NA   | 1.085 | 6.27E-01 |
| MSMEG_0578 | acyl-CoA dehydrogenase, middle domain protein                 | NA   | 1.187 | 4.93E-01 |
| MSMEG_0579 | helix-turn-helix, Fis-type                                    | NA   | 1.537 | 5.02E-02 |
| MSMEG_0580 | conserved hypothetical protein                                | NA   | 1.137 | 1.90E-02 |
| MSMEG_0581 | 4-aminobutyrate transaminase                                  | gabT | 1.040 | 7.87E-01 |
| MSMEG_0582 | succinic semialdehyde dehydrogenase                           | NA   | 1.112 | 6.63E-01 |
| MSMEG_0583 | probable membrane protein                                     | NA   | 0.979 | 8.16E-01 |
| MSMEG_0584 | hypothetical protein                                          | NA   | 0.935 | 7.59E-01 |
| MSMEG_0585 | L-carnitine dehydratase/bile acid-inducible protein F         | NA   | 0.948 | 7.02E-01 |
| MSMEG_0586 | stas domain, putative                                         | NA   | 0.882 | 3.57E-01 |
| MSMEG_0587 | L-rhamnose 1-epimerase                                        | rhaU | 1.013 | 9.28E-01 |
| MSMEG_0588 | putative rhamnose transport protein, MFS family protein       | NA   | 1.120 | 5.06E-01 |
| MSMEG_0589 | L-rhamnose isomerase                                          | rhaI | 0.855 | 2.42E-01 |
| MSMEG_0590 | rhamnulose-1-phosphate aldolase/alcohol dehydrogenase         | rhaD | 1.279 | 2.83E-01 |
| MSMEG_0591 | rhamnulokinase                                                | rhaB | 1.030 | 6.90E-01 |
| MSMEG_0592 | putative rhamnose catabolism operon transcriptional regulator | NA   | 1.276 | 2.04E-01 |
| MSMEG_0593 | conserved hypothetical protein                                | NA   | 1.137 | 5.29E-01 |
| MSMEG_0594 | iron-sulfur cluster binding protein                           | NA   | 0.937 | 4.76E-01 |
| MSMEG_0595 | glycolate oxidase                                             | NA   | 0.817 | 2.11E-02 |

|            |                                                   |     |       |          |
|------------|---------------------------------------------------|-----|-------|----------|
| MSMEG_0596 | bacterial regulatory protein, GntR family protein | NA  | 1.091 | 3.32E-01 |
| MSMEG_0597 | conserved hypothetical protein                    | NA  | 1.061 | 6.24E-01 |
| MSMEG_0598 | hypothetical protein                              | NA  | 1.373 | 3.17E-01 |
| MSMEG_0599 | acyl-CoA synthase                                 | NA  | 0.782 | 1.21E-03 |
| MSMEG_0600 | dehydrogenase                                     | NA  | 1.582 | 2.99E-02 |
| MSMEG_0601 | conserved hypothetical protein                    | NA  | 1.096 | 1.23E-01 |
| MSMEG_0602 | hypothetical protein                              | NA  | 1.170 | 3.51E-01 |
| MSMEG_0603 | putative acyl-CoA dehydrogenase                   | NA  | 0.501 | 5.83E-03 |
| MSMEG_0604 | glyoxylate reductase                              | NA  | 0.681 | 4.94E-03 |
| MSMEG_0605 | conserved hypothetical protein                    | NA  | 0.650 | 5.63E-03 |
| MSMEG_0606 | transcriptional regulator, TetR family protein    | NA  | 0.892 | 1.75E-01 |
| MSMEG_0607 | methyltransferase, putative, family protein       | NA  | 1.081 | 3.76E-01 |
| MSMEG_0608 | glyoxalase family protein                         | NA  | 0.905 | 1.01E-01 |
| MSMEG_0609 | helix-turn-helix domain protein                   | NA  | 0.899 | 6.77E-01 |
| MSMEG_0610 | beta-lactamase                                    | NA  | 1.475 | 2.65E-01 |
| MSMEG_0611 | para-nitrobenzyl esterase                         | NA  | 1.213 | 3.91E-01 |
| MSMEG_0612 | transcriptional regulator, TetR family protein    | NA  | 1.083 | 6.65E-01 |
| MSMEG_0613 | conserved hypothetical protein                    | NA  | 0.942 | 5.94E-01 |
| MSMEG_0614 | methyltransferase                                 | NA  | 1.031 | 7.82E-01 |
| MSMEG_0615 | ATPase, AAA family protein                        | NA  | 0.860 | 2.59E-02 |
| MSMEG_0616 | conserved hypothetical protein                    | NA  | 0.998 | 8.65E-01 |
| MSMEG_0617 | ftsk/spoiii family protein                        | NA  | 1.068 | 8.33E-01 |
| MSMEG_0618 | pe family protein                                 | NA  | 1.227 | 3.79E-01 |
| MSMEG_0619 | ppe family protein                                | NA  | 1.041 | 8.33E-01 |
| MSMEG_0620 | pe family protein                                 | NA  | 0.913 | 8.08E-01 |
| MSMEG_0621 | low molecular weight protein antigen 7            | NA  | 0.959 | 8.75E-01 |
| MSMEG_0622 | putative DNA-binding protein                      | NA  | 0.798 | 9.25E-02 |
| MSMEG_0623 | secretion protein Snm4                            | snm | 0.899 | 4.87E-01 |
| MSMEG_0624 | subtilase family protein                          | NA  | 1.031 | 7.98E-01 |
| MSMEG_0625 | conserved hypothetical protein                    | NA  | 1.285 | 5.99E-02 |
| MSMEG_0626 | conserved hypothetical protein                    | NA  | 0.914 | 7.31E-01 |

|            |                                                                                           |      |       |          |
|------------|-------------------------------------------------------------------------------------------|------|-------|----------|
| MSMEG_0627 | glycosyl transferase, family protein 39                                                   | NA   | 0.985 | 9.17E-01 |
| MSMEG_0628 | amidohydrolase family protein                                                             | NA   | 0.897 | 6.31E-02 |
| MSMEG_0629 | trans-aconitate 2-methyltransferase                                                       | NA   | 1.069 | 5.99E-01 |
| MSMEG_0630 | conserved hypothetical protein                                                            | NA   | 1.918 | 1.01E-01 |
| MSMEG_0631 | sulfatase family protein, authentic frameshift; this gene contains a frame shift which is | NA   | 0.913 | 1.09E-01 |
| MSMEG_0632 | conserved hypothetical protein                                                            | NA   | 0.811 | 6.55E-02 |
| MSMEG_0633 | PAP2 superfamily protein                                                                  | NA   | 1.216 | 2.71E-01 |
| MSMEG_0634 | PAP2 superfamily protein                                                                  | NA   | 1.066 | 8.19E-01 |
| MSMEG_0635 | putative conserved exported protein                                                       | NA   | 0.620 | 4.30E-03 |
| MSMEG_0636 | conserved hypothetical protein                                                            | NA   | 0.953 | 1.95E-01 |
| MSMEG_0637 | iron-sulfur binding oxidoreductase                                                        | NA   | 1.468 | 3.73E-01 |
| MSMEG_0638 | conserved hypothetical proline and threonine rich protein                                 | NA   | 1.005 | 9.60E-01 |
| MSMEG_0639 | oligopeptide transport ATP-binding protein AppF                                           | NA   | 0.921 | 8.12E-02 |
| MSMEG_0640 | oligopeptide transport ATP-binding protein OppD                                           | NA   | 0.942 | 2.63E-01 |
| MSMEG_0641 | binding-protein-dependent transport systems inner membrane component                      | NA   | 0.892 | 1.49E-01 |
| MSMEG_0642 | hypothetical ABC transporter permease protein YliD                                        | NA   | 0.857 | 4.35E-02 |
| MSMEG_0643 | extracellular solute-binding protein, family protein 5, putative                          | NA   | 1.049 | 5.74E-02 |
| MSMEG_0644 | cupin domain protein                                                                      | NA   | 0.950 | 5.00E-01 |
| MSMEG_0645 | putative beta-1,3-glucanase                                                               | NA   | 0.905 | 1.97E-01 |
| MSMEG_0646 | putative transporter                                                                      | NA   | 0.977 | 4.22E-01 |
| MSMEG_0647 | phosphonate ABC transporter, ATP-binding protein                                          | phnC | 1.095 | 2.82E-01 |
| MSMEG_0648 | hypothetical protein                                                                      | NA   | 0.976 | 7.21E-01 |
| MSMEG_0649 | phosphonate-binding periplasmic protein                                                   | NA   | 1.683 | 1.14E-02 |
| MSMEG_0650 | GntR-family protein transcriptional regulator                                             | NA   | 1.043 | 3.07E-01 |
| MSMEG_0651 | putative conserved exported protein                                                       | NA   | 1.048 | 8.64E-01 |
| MSMEG_0652 | hypothetical protein                                                                      | NA   | 1.009 | 8.66E-01 |
| MSMEG_0653 | hypothetical protein; this gene contains a frame shift which is not the result of sequen  | NA   | 1.085 | 1.51E-01 |
| MSMEG_0654 | conserved hypothetical protein                                                            | NA   | 1.249 | 5.75E-01 |
| MSMEG_0655 | glucose 1-dehydrogenase, putative                                                         | NA   | 1.184 | 5.52E-01 |
| MSMEG_0656 | transcriptional regulator, TetR family protein                                            | NA   | 1.289 | 1.01E-01 |
| MSMEG_0657 | Rieske 2Fe-2S domain protein                                                              | NA   | 1.036 | 8.28E-01 |

|            |                                                                    |     |       |          |
|------------|--------------------------------------------------------------------|-----|-------|----------|
| MSMEG_0658 | polyamine ABC-transporter, inner membrane subunit                  | NA  | 0.987 | 8.78E-01 |
| MSMEG_0659 | polyamine ABC transporter permease protein                         | NA  | 0.965 | 6.88E-01 |
| MSMEG_0660 | Bacterial extracellular solute-binding protein                     | NA  | 1.205 | 3.15E-01 |
| MSMEG_0661 | glutamate-1-semialdehyde 2,1-aminomutase                           | NA  | 0.876 | 2.76E-01 |
| MSMEG_0662 | putrescine transport ATP-binding protein PotG                      | NA  | 0.981 | 8.98E-01 |
| MSMEG_0663 | TetR-family protein transcriptional regulator                      | NA  | 1.140 | 3.22E-02 |
| MSMEG_0664 | FAD dependent oxidoreductase                                       | NA  | 1.215 | 3.57E-01 |
| MSMEG_0665 | sarcosine oxidase subunit beta, putative                           | NA  | 0.962 | 8.42E-01 |
| MSMEG_0666 | acetyl-CoA synthetase, putative                                    | NA  | 1.148 | 5.77E-01 |
| MSMEG_0667 | butyryl-CoA dehydrogenase                                          | NA  | 0.989 | 8.64E-01 |
| MSMEG_0668 | integral membrane protein                                          | NA  | 1.052 | 6.39E-01 |
| MSMEG_0669 | hypothetical protein                                               | NA  | 0.912 | 2.20E-01 |
| MSMEG_0670 | FAD dependent oxidoreductase                                       | NA  | 0.984 | 9.43E-01 |
| MSMEG_0671 | S-(hydroxymethyl)glutathione dehydrogenase                         | NA  | 0.973 | 9.30E-01 |
| MSMEG_0672 | conserved hypothetical protein                                     | NA  | 1.233 | 5.81E-01 |
| MSMEG_0673 | hypothetical protein                                               | NA  | 0.892 | 8.28E-03 |
| MSMEG_0674 | ErfK/YbiS/YcfS/YnhG family protein                                 | NA  | 1.013 | 8.27E-01 |
| MSMEG_0675 | putative cytochrome P450 144                                       | NA  | 0.990 | 8.37E-01 |
| MSMEG_0676 | putative transcriptional regulatory protein                        | NA  | 1.449 | 4.18E-02 |
| MSMEG_0678 | deoxycytidine triphosphate deaminase                               | dcd | 1.250 | 6.85E-02 |
| MSMEG_0679 | conserved hypothetical protein                                     | NA  | 1.200 | 2.29E-03 |
| MSMEG_0680 | UDP-glucose 6-dehydrogenase                                        | NA  | 1.554 | 1.98E-01 |
| MSMEG_0681 | P450 heme-thiolate protein                                         | NA  | 0.979 | 5.54E-01 |
| MSMEG_0682 | conserved hypothetical protein, putative                           | NA  | 0.937 | 2.19E-01 |
| MSMEG_0683 | conserved hypothetical protein                                     | NA  | 0.874 | 6.80E-02 |
| MSMEG_0684 | aldehyde oxidase and xanthine dehydrogenase, molybdopterin binding | NA  | 1.237 | 2.43E-01 |
| MSMEG_0685 | oxidoreductase, molybdopterin-binding subunit                      | NA  | 1.536 | 5.66E-01 |
| MSMEG_0686 | oxidoreductase                                                     | NA  | 1.104 | 2.99E-01 |
| MSMEG_0687 | conserved hypothetical protein                                     | NA  | 1.371 | 1.06E-01 |
| MSMEG_0688 | aspartate aminotransferase                                         | NA  | 1.590 | 4.45E-03 |
| MSMEG_0689 | hypothetical protein                                               | NA  | 1.169 | 4.32E-01 |

|            |                                                                                          |      |        |          |
|------------|------------------------------------------------------------------------------------------|------|--------|----------|
| MSMEG_0690 | iron-sulfur cluster-binding protein                                                      | NA   | 1.022  | 4.63E-01 |
| MSMEG_0691 | putative transcriptional regulatory protein                                              | NA   | 0.922  | 3.78E-01 |
| MSMEG_0692 | conserved hypothetical protein                                                           | NA   | 0.965  | 5.41E-01 |
| MSMEG_0693 | conserved hypothetical protein                                                           | NA   | 1.039  | 5.18E-01 |
| MSMEG_0694 | conserved hypothetical protein; this gene contains a frame shift which is not the result | NA   | 0.846  | 7.98E-02 |
| MSMEG_0695 | isoniazid inducible protein IniA                                                         | NA   | 0.925  | 3.62E-01 |
| MSMEG_0696 | alanine-rich protein                                                                     | NA   | 1.258  | 4.76E-01 |
| MSMEG_0697 | integral membrane protein                                                                | NA   | 1.419  | 3.69E-01 |
| MSMEG_0698 | isoniazid inducible protein IniC                                                         | NA   | 1.735  | 2.89E-01 |
| MSMEG_0699 | conserved hypothetical proline rich protein                                              | NA   | 15.080 | 3.79E-01 |
| MSMEG_0700 | hypothetical protein                                                                     | NA   | 1.200  | 5.85E-02 |
| MSMEG_0701 | hypothetical protein                                                                     | NA   | 1.730  | 2.63E-01 |
| MSMEG_0702 | monooxygenase                                                                            | NA   | 1.240  | 1.17E-01 |
| MSMEG_0703 | conserved hypothetical protein                                                           | NA   | 0.868  | 5.12E-03 |
| MSMEG_0704 | LpqJ protein                                                                             | NA   | 0.948  | 7.03E-01 |
| MSMEG_0705 | putative permease of the major facilitator superfamily protein                           | NA   | 1.015  | 7.06E-01 |
| MSMEG_0706 | 4-carboxy-4-hydroxy-2-oxoadipate aldolase                                                | NA   | 1.020  | 7.61E-01 |
| MSMEG_0707 | conserved hypothetical protein                                                           | NA   | 1.368  | 2.60E-01 |
| MSMEG_0708 | transcriptional regulator, LysR family protein                                           | NA   | 1.174  | 4.16E-02 |
| MSMEG_0709 | chaperone protein DnaK                                                                   | dnaK | 1.033  | 6.81E-01 |
| MSMEG_0710 | co-chaperone GrpE                                                                        | grpE | 1.000  | 1.00E+00 |
| MSMEG_0711 | chaperone protein DnaJ                                                                   | dnaJ | 1.227  | 7.28E-02 |
| MSMEG_0712 | transcriptional regulator, TetR family protein                                           | NA   | 1.179  | 2.56E-01 |
| MSMEG_0713 | transcriptional regulator, MerR family protein                                           | NA   | 1.230  | 1.17E-01 |
| MSMEG_0714 | acyl-CoA dehydrogenase                                                                   | NA   | 0.915  | 6.38E-01 |
| MSMEG_0715 | 3-oxoacyl-[acyl-carrier-protein] reductase                                               | NA   | 1.152  | 4.50E-01 |
| MSMEG_0716 | major facilitator superfamily protein                                                    | NA   | 1.089  | 5.67E-01 |
| MSMEG_0717 | aldose 1-epimerase subfamily protein                                                     | NA   | 1.164  | 6.51E-02 |
| MSMEG_0718 | acetyl-CoA synthetase                                                                    | NA   | 1.640  | 3.83E-01 |
| MSMEG_0719 | flavo-hemoprotein                                                                        | NA   | 1.112  | 1.08E-01 |
| MSMEG_0720 | integral membrane protein                                                                | NA   | 1.086  | 3.89E-01 |

|            |                                                                                         |      |       |          |
|------------|-----------------------------------------------------------------------------------------|------|-------|----------|
| MSMEG_0721 | RemQ protein; this gene contains a frame shift which is not the result of sequencing ei | NA   | 1.193 | 3.06E-01 |
| MSMEG_0721 | RemQ protein; this gene contains a frame shift which is not the result of sequencing ei | NA   | 1.350 | 1.19E-01 |
| MSMEG_0722 | conserved hypothetical protein                                                          | NA   | 1.165 | 1.42E-01 |
| MSMEG_0723 | conserved hypothetical protein                                                          | NA   | 1.324 | 3.35E-01 |
| MSMEG_0725 | IS1137, transposase orfB                                                                | NA   | 1.065 | 3.33E-01 |
| MSMEG_0726 | hypothetical protein                                                                    | NA   | 0.939 | 5.30E-01 |
| MSMEG_0727 | hypothetical protein                                                                    | NA   | 1.008 | 9.54E-01 |
| MSMEG_0728 | hypothetical protein                                                                    | NA   | 0.822 | 1.79E-02 |
| MSMEG_0729 | conserved hypothetical protein                                                          | NA   | 0.997 | 9.75E-01 |
| MSMEG_0730 | oleandomycin glycosyltransferase                                                        | NA   | 1.050 | 7.00E-01 |
| MSMEG_0731 | conserved hypothetical protein                                                          | NA   | 0.927 | 4.81E-01 |
| MSMEG_0732 | chaperone ClpB                                                                          | NA   | 1.264 | 2.20E-01 |
| MSMEG_0733 | dihydrodipicolinate reductase, N-terminus domain protein                                | dapB | 0.717 | 9.72E-03 |
| MSMEG_0734 | Rieske [2Fe-2S] domain protein                                                          | NA   | 0.922 | 6.37E-01 |
| MSMEG_0735 | putative transcriptional regulator                                                      | NA   | 1.511 | 1.24E-01 |
| MSMEG_0736 | conserved hypothetical protein                                                          | NA   | 0.932 | 4.15E-02 |
| MSMEG_0737 | dehydrogenase                                                                           | NA   | 1.259 | 2.48E-02 |
| MSMEG_0738 | conserved hypothetical protein                                                          | NA   | 1.178 | 1.03E-01 |
| MSMEG_0739 | spou rRNA methylase family protein                                                      | NA   | 1.188 | 6.81E-02 |
| MSMEG_0740 | glycosyl hydrolase family protein 76                                                    | NA   | 1.044 | 2.30E-01 |
| MSMEG_0741 | conserved hypothetical protein                                                          | NA   | 1.017 | 8.79E-01 |
| MSMEG_0742 | probable transcriptional regulatory protein                                             | NA   | 0.980 | 9.00E-01 |
| MSMEG_0743 | xanthine dehydrogenase                                                                  | NA   | 1.090 | 1.16E-01 |
| MSMEG_0744 | carbon monoxide dehydrogenase medium chain                                              | NA   | 1.080 | 3.54E-01 |
| MSMEG_0745 | [2Fe-2S] binding domain protein                                                         | NA   | 1.008 | 9.71E-01 |
| MSMEG_0746 | carbon-monoxide dehydrogenase, large subunit                                            | NA   | 0.968 | 5.23E-01 |
| MSMEG_0747 | carbon monoxide dehydrogenase F protein                                                 | NA   | 2.250 | 4.22E-01 |
| MSMEG_0748 | ATPase associated with various cellular activities, AAA_5                               | NA   | 1.565 | 4.65E-01 |
| MSMEG_0749 | carbon monoxide dehydrogenase subunit G (CoxG) family protein                           | NA   | 0.972 | 7.59E-01 |
| MSMEG_0750 | membrane protein                                                                        | NA   | 0.965 | 3.45E-01 |
| MSMEG_0751 | conserved hypothetical protein                                                          | NA   | 1.275 | 4.89E-01 |

|            |                                                                                        |      |       |          |
|------------|----------------------------------------------------------------------------------------|------|-------|----------|
| MSMEG_0752 | fructose-bisphosphate aldolase, class II                                               | fbaA | 0.962 | 6.13E-01 |
| MSMEG_0753 | conserved hypothetical protein                                                         | NA   | 0.845 | 2.59E-02 |
| MSMEG_0754 | conserved hypothetical protein                                                         | NA   | 1.039 | 4.94E-01 |
| MSMEG_0755 | cobalt-zinc-cadmium resistance protein                                                 | NA   | 1.321 | 4.52E-03 |
| MSMEG_0756 | peptidase, M50B family protein                                                         | NA   | 1.083 | 5.34E-01 |
| MSMEG_0757 | hypothetical protein                                                                   | NA   | 4.891 | 1.57E-02 |
| MSMEG_0758 | conserved hypothetical protein                                                         | NA   | 1.101 | 1.98E-01 |
| MSMEG_0759 | adenylosuccinate synthetase                                                            | purA | 0.931 | 1.95E-01 |
| MSMEG_0760 | thioesterase family protein                                                            | NA   | 0.983 | 5.85E-01 |
| MSMEG_0761 | conserved domain protein                                                               | NA   | 1.153 | 2.84E-01 |
| MSMEG_0762 | cytochrome P450 FAS1                                                                   | NA   | 0.902 | 1.60E-02 |
| MSMEG_0763 | antibiotic transporter                                                                 | NA   | 0.946 | 3.77E-01 |
| MSMEG_0764 | Na <sup>+</sup> /H <sup>+</sup> antiporter                                             | NA   | 1.088 | 4.49E-01 |
| MSMEG_0765 | zinc finger, UBP-type                                                                  | NA   | 1.013 | 8.91E-01 |
| MSMEG_0766 | phosphoribosylglycinamide formyltransferase 2                                          | purT | 0.887 | 1.01E-01 |
| MSMEG_0767 | hypothetical protein                                                                   | NA   | 0.864 | 9.52E-02 |
| MSMEG_0768 | conserved hypothetical protein                                                         | NA   | 1.126 | 5.44E-02 |
| MSMEG_0769 | O-succinylhomoserine sulfhydrylase                                                     | metZ | 1.233 | 1.15E-01 |
| MSMEG_0770 | hypothetical protein                                                                   | NA   | 1.255 | 2.84E-02 |
| MSMEG_0771 | hypothetical oxidoreductase YqjQ                                                       | NA   | 0.911 | 3.59E-01 |
| MSMEG_0772 | phytase                                                                                | NA   | 1.061 | 7.19E-01 |
| MSMEG_0773 | acetyltransferase                                                                      | NA   | 1.002 | 9.91E-01 |
| MSMEG_0774 | flavin-dependent oxidoreductase; this gene contains a frame shift which is not the res | NA   | 2.148 | 1.36E-02 |
| MSMEG_0775 | metallo-beta-lactamase superfamily protein                                             | NA   | 0.973 | 4.44E-01 |
| MSMEG_0776 | conserved hypothetical protein                                                         | NA   | 1.351 | 1.13E-01 |
| MSMEG_0777 | F420-dependent glucose-6-phosphate dehydrogenase                                       | NA   | 0.832 | 3.81E-02 |
| MSMEG_0778 | putative transcriptional regulator                                                     | NA   | 1.086 | 2.29E-01 |
| MSMEG_0779 | short-chain dehydrogenase/reductase SDR                                                | NA   | 1.375 | 2.15E-01 |
| MSMEG_0780 | phosphotransferase enzyme family protein                                               | NA   | 1.649 | 3.64E-01 |
| MSMEG_0781 | amino acid permease                                                                    | NA   | 1.546 | 3.22E-03 |
| MSMEG_0782 | aminotransferase class-III                                                             | NA   | 1.379 | 2.54E-02 |



|            |                                                                                               |      |       |          |
|------------|-----------------------------------------------------------------------------------------------|------|-------|----------|
| MSMEG_0783 | phosphate acetyltransferase                                                                   | pta  | 1.155 | 1.50E-02 |
| MSMEG_0784 | acetate kinase                                                                                | ackA | 0.948 | 4.26E-01 |
| MSMEG_0785 | conserved hypothetical protein                                                                | NA   | 1.217 | 3.59E-01 |
| MSMEG_0786 | serine/threonine protein kinase                                                               | NA   | 0.823 | 3.55E-01 |
| MSMEG_0787 | Bacterial extracellular solute-binding protein, family protein 3                              | NA   | 1.039 | 8.37E-01 |
| MSMEG_0788 | putative conserved membrane protein                                                           | NA   | 0.790 | 2.15E-02 |
| MSMEG_0789 | thiamine-phosphate pyrophosphorylase                                                          | thiE | 0.889 | 1.67E-01 |
| MSMEG_0790 | hydrolase, NUDIX family protein                                                               | NA   | 1.026 | 5.64E-01 |
| MSMEG_0791 | glycine oxidase ThiO                                                                          | thiO | 0.868 | 9.62E-02 |
| MSMEG_0792 | thiamine biosynthesis protein ThiS                                                            | thiS | 0.819 | 3.59E-03 |
| MSMEG_0793 | thiazole biosynthesis protein ThiG                                                            | thiG | 0.847 | 8.64E-02 |
| MSMEG_0794 | conserved hypothetical protein                                                                | NA   | 0.895 | 2.12E-01 |
| MSMEG_0795 | ABC transporter ATP-binding protein                                                           | NA   | 0.829 | 2.49E-01 |
| MSMEG_0796 | ABC transporter integral membrane subunit                                                     | NA   | 0.860 | 1.67E-02 |
| MSMEG_0797 | conserved hypothetical protein; this gene contains a frame shift which is not the result of a | NA   | 0.742 | 3.01E-02 |
| MSMEG_0797 | conserved hypothetical protein; this gene contains a frame shift which is not the result of a | NA   | 1.075 | 6.83E-01 |
| MSMEG_0798 | hypothetical protein                                                                          | NA   | 0.692 | 9.52E-02 |
| MSMEG_0799 | hypothetical protein                                                                          | NA   | 0.866 | 4.65E-02 |
| MSMEG_0800 | hypothetical protein                                                                          | NA   | 0.856 | 2.54E-01 |
| MSMEG_0803 | hypothetical protein                                                                          | NA   | 1.036 | 7.18E-01 |
| MSMEG_0803 | hypothetical protein                                                                          | NA   | 1.339 | 1.43E-01 |
| MSMEG_0804 | hypothetical protein                                                                          | NA   | 0.973 | 7.93E-01 |
| MSMEG_0805 | conserved hypothetical protein                                                                | NA   | 1.191 | 8.44E-03 |
| MSMEG_0806 | hydrolase                                                                                     | NA   | 0.889 | 1.57E-01 |
| MSMEG_0807 | leupeptin-inactivating enzyme 1                                                               | NA   | 0.982 | 8.91E-01 |
| MSMEG_0808 | possible chalcone synthase Pks10                                                              | NA   | 1.192 | 3.89E-01 |
| MSMEG_0809 | isoprenylcysteine carboxyl methyltransferase                                                  | NA   | 1.175 | 4.94E-01 |
| MSMEG_0810 | putative pyrimidine permease RutG                                                             | NA   | 1.047 | 4.63E-01 |
| MSMEG_0811 | oxidoreductase                                                                                | NA   | 1.140 | 6.82E-01 |
| MSMEG_0812 | amino acid transporter                                                                        | NA   | 1.326 | 8.35E-02 |
| MSMEG_0813 | conserved hypothetical protein                                                                | NA   | 1.130 | 1.28E-01 |

|            |                                                                                          |      |       |          |
|------------|------------------------------------------------------------------------------------------|------|-------|----------|
| MSMEG_0814 | membrane protein                                                                         | NA   | 0.917 | 1.69E-01 |
| MSMEG_0815 | transcriptional regulator, TetR family protein                                           | NA   | 0.985 | 7.53E-01 |
| MSMEG_0816 | flavin-binding monooxygenase                                                             | NA   | 0.785 | 9.75E-03 |
| MSMEG_0817 | LysR-family protein transcriptional regulator                                            | NA   | 2.545 | 3.57E-01 |
| MSMEG_0818 | transporter, major facilitator family protein                                            | NA   | 2.019 | 2.25E-01 |
| MSMEG_0819 | N-carbamoyl-L-amino acid amidohydrolase                                                  | NA   | 1.541 | 7.49E-02 |
| MSMEG_0820 | conserved hypothetical protein                                                           | NA   | 1.873 | 4.08E-01 |
| MSMEG_0821 | glutamyl-tRNA(Gln) amidotransferase subunit A                                            | NA   | 1.791 | 6.75E-02 |
| MSMEG_0822 | cytochrome P450                                                                          | NA   | 1.024 | 9.11E-01 |
| MSMEG_0823 | conserved hypothetical protein                                                           | NA   | 1.051 | 8.52E-01 |
| MSMEG_0824 | conserved hypothetical protein                                                           | NA   | 0.703 | 5.46E-03 |
| MSMEG_0825 | phosphomethylpyrimidine kinase                                                           | thiD | 0.731 | 8.84E-04 |
| MSMEG_0826 | thiamine biosynthesis protein ThiC                                                       | thiC | 0.710 | 7.45E-04 |
| MSMEG_0827 | major facilitator superfamily protein MFS_1                                              | NA   | 1.586 | 2.12E-01 |
| MSMEG_0828 | immunogenic protein MPT63                                                                | NA   | 1.255 | 1.51E-01 |
| MSMEG_0829 | exodeoxyribonuclease III                                                                 | xth  | 1.083 | 4.17E-01 |
| MSMEG_0830 | acetyltransferase, gnat family protein                                                   | NA   | 1.299 | 9.71E-02 |
| MSMEG_0831 | short chain dehydrogenase                                                                | NA   | 1.275 | 1.12E-01 |
| MSMEG_0832 | peptide deformylase                                                                      | def  | 1.116 | 7.80E-02 |
| MSMEG_0833 | conserved hypothetical protein                                                           | NA   | 0.989 | 9.36E-01 |
| MSMEG_0834 | tuberculin related peptide                                                               | NA   | 0.861 | 5.19E-04 |
| MSMEG_0835 | copper/zinc superoxide dismutase                                                         | sodC | 1.035 | 7.05E-01 |
| MSMEG_0836 | carboxylate-amine ligase                                                                 | NA   | 1.045 | 4.37E-01 |
| MSMEG_0837 | hypothetical protein                                                                     | NA   | 0.800 | 3.91E-02 |
| MSMEG_0838 | AsnC-family protein transcriptional regulator                                            | NA   | 1.381 | 2.30E-01 |
| MSMEG_0839 | ATP-dependent protease La (LON) domain subfamily protein                                 | NA   | 1.138 | 1.48E-02 |
| MSMEG_0840 | hypothetical protein                                                                     | NA   | 0.746 | 9.02E-04 |
| MSMEG_0841 | hypothetical protein; this gene contains a frame shift which is not the result of sequen | NA   | 0.830 | 1.02E-01 |
| MSMEG_0842 | hypothetical protein                                                                     | NA   | 0.950 | 4.41E-01 |
| MSMEG_0843 | multisubunit Na <sup>+</sup> /H <sup>+</sup> antiporter, G subunit                       | NA   | 1.146 | 6.52E-02 |
| MSMEG_0844 | multiple resistance and pH regulation protein F                                          | NA   | 1.213 | 2.05E-02 |

|            |                                                                                                   |     |       |          |
|------------|---------------------------------------------------------------------------------------------------|-----|-------|----------|
| MSMEG_0845 | multisubunit Na <sup>+</sup> /H <sup>+</sup> antiporter                                           | NA  | 1.205 | 7.78E-02 |
| MSMEG_0846 | NADH-ubiquinone oxidoreductase/multisubunit na <sup>+</sup> /h <sup>+</sup> antiporter, d subunit | NA  | 1.269 | 9.02E-02 |
| MSMEG_0847 | NADH-ubiquinone/plastoquinone oxidoreductase chain 4l family protein                              | NA  | 1.309 | 3.60E-02 |
| MSMEG_0848 | NADH ubiquinone oxidoreductase subunit 5                                                          | NA  | 1.174 | 4.13E-02 |
| MSMEG_0849 | oxygenase                                                                                         | NA  | 1.781 | 6.41E-03 |
| MSMEG_0850 | conserved hypothetical protein                                                                    | NA  | 1.007 | 9.65E-01 |
| MSMEG_0851 | Citrate transporter                                                                               | NA  | 0.984 | 8.71E-01 |
| MSMEG_0852 | CBS domain protein                                                                                | NA  | 0.831 | 7.84E-02 |
| MSMEG_0853 | conserved hypothetical protein                                                                    | NA  | 0.805 | 6.00E-02 |
| MSMEG_0854 | two-component system sensor kinase                                                                | NA  | 0.921 | 4.60E-01 |
| MSMEG_0855 | conserved hypothetical protein                                                                    | NA  | 1.149 | 2.84E-01 |
| MSMEG_0856 | DNA-binding response regulator, LuxR family protein                                               | NA  | 1.081 | 6.30E-01 |
| MSMEG_0857 | conserved hypothetical protein                                                                    | NA  | 1.133 | 4.69E-02 |
| MSMEG_0858 | cell division control protein Cdc48                                                               | NA  | 0.874 | 2.37E-01 |
| MSMEG_0859 | transcriptional regulator, TetR family protein                                                    | NA  | 0.900 | 1.84E-01 |
| MSMEG_0860 | CDP-diacylglycerol--serine O-phosphatidyltransferase                                              | NA  | 0.965 | 4.69E-01 |
| MSMEG_0861 | phosphatidylserine decarboxylase                                                                  | psd | 0.926 | 2.65E-01 |
| MSMEG_0862 | molybdopterin biosynthesis protein MoeA                                                           | NA  | 0.987 | 8.52E-01 |
| MSMEG_0863 | short chain dehydrogenase                                                                         | NA  | 1.024 | 4.99E-01 |
| MSMEG_0864 | bacterial membrane flanked domain family protein                                                  | NA  | 1.114 | 1.91E-01 |
| MSMEG_0865 | bacterial membrane flanked domain family protein                                                  | NA  | 1.183 | 3.14E-01 |
| MSMEG_0866 | DNA or RNA helicase of superfamily protein II                                                     | NA  | 1.100 | 6.25E-01 |
| MSMEG_0867 | hydrolase                                                                                         | NA  | 1.132 | 2.80E-02 |
| MSMEG_0868 | hypothetical protein                                                                              | NA  | 0.954 | 6.67E-01 |
| MSMEG_0869 | hypothetical protein                                                                              | NA  | 0.972 | 7.16E-01 |
| MSMEG_0870 | oxidoreductase                                                                                    | NA  | 2.176 | 3.72E-01 |
| MSMEG_0871 | putative aldehyde or xanthine dehydrogenase, molybdopterin binding subunit protein                | NA  | 0.921 | 5.48E-01 |
| MSMEG_0872 | twin-arginine translocation pathway signal                                                        | NA  | 1.271 | 3.95E-01 |
| MSMEG_0873 | hypothetical protein                                                                              | NA  | 1.229 | 3.97E-01 |
| MSMEG_0874 | transcriptional regulator, GntR family protein                                                    | NA  | 0.971 | 4.40E-01 |
| MSMEG_0875 | putative sialic acid transporter                                                                  | NA  | 0.844 | 3.99E-02 |

|            |                                                     |      |       |          |
|------------|-----------------------------------------------------|------|-------|----------|
| MSMEG_0876 | short chain dehydrogenase                           | NA   | 0.974 | 3.87E-01 |
| MSMEG_0877 | dihydrodipicolinate synthase                        | NA   | 0.940 | 4.66E-01 |
| MSMEG_0878 | transcriptional regulator                           | NA   | 0.883 | 1.36E-01 |
| MSMEG_0879 | hypothetical protein                                | NA   | 0.899 | 3.70E-02 |
| MSMEG_0880 | chaperonin GroL                                     | groL | 0.557 | 5.74E-04 |
| MSMEG_0881 | conserved hypothetical protein                      | NA   | 1.384 | 2.77E-02 |
| MSMEG_0882 | conserved hypothetical protein                      | NA   | 1.020 | 8.75E-01 |
| MSMEG_0883 | amidohydrolase family protein                       | NA   | 1.055 | 3.64E-01 |
| MSMEG_0884 | glyoxalase family protein                           | NA   | 0.994 | 9.36E-01 |
| MSMEG_0885 | conserved hypothetical protein                      | NA   | 0.835 | 4.57E-01 |
| MSMEG_0886 | serine/threonine-protein kinase PknD                | NA   | 0.985 | 8.70E-01 |
| MSMEG_0887 | conserved hypothetical protein                      | NA   | 0.999 | 9.84E-01 |
| MSMEG_0888 | conserved hypothetical protein                      | NA   | 1.347 | 4.61E-01 |
| MSMEG_0889 | succinic semialdehyde dehydrogenase                 | NA   | 0.716 | 1.98E-03 |
| MSMEG_0890 | HD domain protein                                   | NA   | 0.941 | 3.28E-01 |
| MSMEG_0891 | polyphosphate kinase 2                              | NA   | 1.292 | 3.14E-01 |
| MSMEG_0892 | conserved hypothetical protein                      | NA   | 0.871 | 2.13E-01 |
| MSMEG_0893 | hypothetical protein                                | NA   | 1.018 | 8.86E-01 |
| MSMEG_0894 | dihydrodipicolinate reductase                       | NA   | 0.775 | 2.59E-02 |
| MSMEG_0895 | bacterial regulatory protein, GntR family protein   | NA   | 0.954 | 3.02E-01 |
| MSMEG_0896 | integral membrane transport protein                 | NA   | 1.053 | 7.48E-01 |
| MSMEG_0897 | conserved hypothetical protein                      | NA   | 1.373 | 9.01E-02 |
| MSMEG_0898 | tagatose-1,6-bisphosphate aldolase GatY             | NA   | 1.269 | 1.77E-02 |
| MSMEG_0899 | prolyl oligopeptidase family protein                | NA   | 1.655 | 3.60E-01 |
| MSMEG_0900 | eptc-inducible aldehyde dehydrogenase               | NA   | 0.748 | 4.77E-02 |
| MSMEG_0901 | conserved hypothetical protein                      | NA   | 0.894 | 3.64E-02 |
| MSMEG_0902 | cyclopropane-fatty-acyl-phospholipid synthase 1     | NA   | 1.218 | 3.77E-01 |
| MSMEG_0903 | dihydrolipoamide dehydrogenase                      | lpdA | 0.841 | 5.78E-02 |
| MSMEG_0904 | probable conserved membrane protein                 | NA   | 1.064 | 4.89E-01 |
| MSMEG_0905 | 4-carboxymuconolactone decarboxylase domain protein | pcaC | 1.064 | 2.45E-01 |
| MSMEG_0906 | DNA-binding protein                                 | NA   | 1.155 | 2.04E-01 |

|            |                                                           |       |       |          |
|------------|-----------------------------------------------------------|-------|-------|----------|
| MSMEG_0907 | conserved hypothetical protein                            | NA    | 1.062 | 8.08E-01 |
| MSMEG_0908 | hypothetical protein                                      | NA    | 0.859 | 1.90E-01 |
| MSMEG_0909 | acyl-ACP thioesterase superfamily protein                 | NA    | 0.978 | 7.18E-01 |
| MSMEG_0910 | hypothetical protein                                      | NA    | 1.067 | 7.94E-01 |
| MSMEG_0911 | isocitrate lyase                                          | aceA  | 1.037 | 6.25E-01 |
| MSMEG_0912 | 3-hydroxybutyryl-CoA dehydrogenase                        | NA    | 1.066 | 4.38E-01 |
| MSMEG_0913 | methoxy mycolic acid synthase 1                           | NA    | 0.700 | 1.17E-03 |
| MSMEG_0914 | conserved hypothetical protein                            | NA    | 1.010 | 8.52E-01 |
| MSMEG_0915 | polyphosphate kinase 2 superfamily protein                | NA    | 0.986 | 5.34E-01 |
| MSMEG_0916 | transcriptional regulator, TetR family protein            | NA    | 0.999 | 9.92E-01 |
| MSMEG_0917 | conserved hypothetical protein                            | NA    | 0.997 | 9.33E-01 |
| MSMEG_0918 | transcriptional regulator, XRE family protein             | NA    | 0.956 | 1.47E-01 |
| MSMEG_0919 | heparin-binding hemagglutinin                             | NA    | 0.962 | 1.85E-01 |
| MSMEG_0920 | conserved hypothetical protein                            | NA    | 1.005 | 6.71E-01 |
| MSMEG_0921 | conserved hypothetical protein                            | NA    | 0.975 | 5.72E-01 |
| MSMEG_0922 | deoxyribose-phosphate aldolase                            | deoC  | 1.085 | 5.33E-01 |
| MSMEG_0923 | conserved hypothetical protein                            | NA    | 1.181 | 9.22E-02 |
| MSMEG_0924 | hydrolase, carbon-nitrogen family protein                 | NA    | 0.853 | 6.07E-02 |
| MSMEG_0925 | conserved hypothetical protein                            | NA    | 1.542 | 4.05E-01 |
| MSMEG_0926 | conserved hypothetical protein                            | NA    | 0.980 | 6.98E-01 |
| MSMEG_0927 | conserved hypothetical protein                            | NA    | 1.118 | 1.73E-01 |
| MSMEG_0928 | UDP-N-acetylenolpyruvoylglucosamine reductase             | murB  | 0.942 | 5.86E-01 |
| MSMEG_0929 | ErfK/YbiS/YcfS/YnhG family protein                        | NA    | 1.158 | 6.75E-02 |
| MSMEG_0930 | serine 3-dehydrogenase                                    | NA    | 0.895 | 5.25E-02 |
| MSMEG_0931 | hypothetical protein                                      | NA    | 1.370 | 2.32E-01 |
| MSMEG_0932 | ROK family protein                                        | NA    | 0.906 | 2.03E-01 |
| MSMEG_0933 | conserved hypothetical protein                            | NA    | 0.986 | 7.44E-01 |
| MSMEG_0934 | conserved hypothetical protein                            | NA    | 1.107 | 4.49E-01 |
| MSMEG_0935 | 2,3-bisphosphoglycerate-dependent phosphoglycerate mutase | NA    | 1.045 | 2.57E-01 |
| MSMEG_0936 | sensor histidine kinase SenX3                             | senX3 | 1.194 | 4.64E-02 |
| MSMEG_0937 | DNA-binding response regulator RegX3                      | regX3 | 1.008 | 8.80E-01 |

|            |                                                                                          |      |       |          |
|------------|------------------------------------------------------------------------------------------|------|-------|----------|
| MSMEG_0938 | conserved hypothetical protein                                                           | NA   | 0.956 | 3.45E-01 |
| MSMEG_0939 | Ppx/GppA phosphatase family protein                                                      | NA   | 0.862 | 1.48E-01 |
| MSMEG_0940 | conserved hypothetical protein                                                           | NA   | 0.941 | 2.13E-01 |
| MSMEG_0941 | AP endonuclease, family protein 2                                                        | NA   | 0.915 | 2.33E-01 |
| MSMEG_0942 | conserved hypothetical protein                                                           | NA   | 0.889 | 6.63E-02 |
| MSMEG_0943 | pyrroline-5-carboxylate reductase                                                        | proC | 1.065 | 2.93E-01 |
| MSMEG_0944 | DNA binding domain, excisionase family protein                                           | NA   | 1.027 | 7.41E-01 |
| MSMEG_0945 | conserved domain protein                                                                 | NA   | 1.035 | 7.82E-01 |
| MSMEG_0946 | NAD dependent epimerase/dehydratase family protein                                       | NA   | 1.067 | 3.82E-01 |
| MSMEG_0947 | acyltransferase                                                                          | NA   | 1.105 | 2.63E-01 |
| MSMEG_0948 | conserved hypothetical protein                                                           | NA   | 1.164 | 3.77E-01 |
| MSMEG_0949 | HAD-superfamily protein subfamily protein IB hydrolase, TIGR01490                        | NA   | 1.101 | 3.63E-01 |
| MSMEG_0950 | hypothetical protein                                                                     | NA   | 1.113 | 4.99E-01 |
| MSMEG_0951 | glutaredoxin 2                                                                           | NA   | 1.073 | 1.23E-01 |
| MSMEG_0952 | glutamyl-tRNA reductase                                                                  | hemA | 0.971 | 6.09E-01 |
| MSMEG_0953 | porphobilinogen deaminase                                                                | hemC | 0.958 | 3.12E-01 |
| MSMEG_0954 | uroporphyrinogen-III synthase                                                            | hemD | 1.112 | 8.74E-02 |
| MSMEG_0955 | hypothetical protein                                                                     | NA   | 1.786 | 3.05E-01 |
| MSMEG_0956 | delta-aminolevulinic acid dehydratase                                                    | hemB | 1.118 | 2.61E-01 |
| MSMEG_0957 | hypothetical protein                                                                     | NA   | 1.118 | 1.66E-01 |
| MSMEG_0958 | hypothetical protein                                                                     | NA   | 1.040 | 5.57E-01 |
| MSMEG_0959 | putative conserved transmembrane protein                                                 | NA   | 0.955 | 3.14E-01 |
| MSMEG_0960 | putative transmembrane protein                                                           | NA   | 1.035 | 6.69E-01 |
| MSMEG_0961 | conserved hypothetical protein; this gene contains a frame shift which is not the result | NA   | 0.956 | 6.04E-01 |
| MSMEG_0962 | TetR-family protein transcriptional regulator                                            | NA   | 1.054 | 4.32E-01 |
| MSMEG_0963 | hypothetical protein                                                                     | NA   | 1.481 | 3.75E-02 |
| MSMEG_0964 | pyridoxamine 5'-phosphate oxidase family protein                                         | NA   | 1.114 | 2.34E-01 |
| MSMEG_0965 | porin                                                                                    | NA   | 0.827 | 1.95E-02 |
| MSMEG_0966 | conserved hypothetical protein                                                           | NA   | 1.487 | 1.22E-01 |
| MSMEG_0967 | conserved hypothetical protein                                                           | NA   | 1.236 | 5.68E-01 |
| MSMEG_0968 | cytochrome P450                                                                          | NA   | 2.410 | 2.83E-01 |

|            |                                                      |      |       |          |
|------------|------------------------------------------------------|------|-------|----------|
| MSMEG_0969 | glutamate-1-semialdehyde-2,1-aminomutase             | hemL | 1.391 | 1.05E-04 |
| MSMEG_0970 | phosphoglycerate mutase family protein               | NA   | 1.087 | 3.04E-01 |
| MSMEG_0971 | conserved hypothetical protein                       | NA   | 1.062 | 4.53E-01 |
| MSMEG_0972 | cytochrome C biogenesis protein transmembrane region | NA   | 0.733 | 9.00E-04 |
| MSMEG_0973 | conserved membrane protein                           | NA   | 0.880 | 2.46E-02 |
| MSMEG_0974 | cytochrome c-type biogenesis protein CcsB            | ccsB | 1.003 | 9.65E-01 |
| MSMEG_0975 | conserved hypothetical protein                       | NA   | 0.946 | 5.94E-01 |
| MSMEG_0976 | conserved hypothetical protein                       | NA   | 1.107 | 5.09E-01 |
| MSMEG_0977 | conserved hypothetical protein                       | NA   | 1.322 | 4.55E-02 |
| MSMEG_0978 | aminotransferase, class V superfamily protein        | NA   | 1.183 | 1.05E-01 |
| MSMEG_0979 | keratin associated protein                           | NA   | 1.105 | 2.17E-01 |
| MSMEG_0980 | signal transduction histidine kinase                 | NA   | 1.620 | 4.46E-01 |
| MSMEG_0981 | two-component system regulator                       | NA   | 1.347 | 1.00E-01 |
| MSMEG_0982 | immunogenic protein                                  | NA   | 1.489 | 1.81E-01 |
| MSMEG_0983 | two-component system response regulator              | NA   | 1.223 | 3.08E-02 |
| MSMEG_0984 | trap transporter, 4tm/12tm fusion protein            | NA   | 0.974 | 8.62E-01 |
| MSMEG_0985 | sugar transporter family protein                     | NA   | 1.097 | 2.84E-02 |
| MSMEG_0986 | RemM protein                                         | NA   | 1.145 | 8.44E-02 |
| MSMEG_0987 | hypothetical protein                                 | NA   | 0.984 | 5.50E-01 |
| MSMEG_0988 | 1,4-dihydroxy-2-naphthoate octaprenyltransferase     | menA | 1.145 | 2.38E-01 |
| MSMEG_0989 | conserved hypothetical protein                       | NA   | 1.048 | 4.41E-01 |
| MSMEG_0990 | methylthioadenosine phosphorylase                    | mtaP | 1.039 | 5.40E-01 |
| MSMEG_0991 | NAD-dependent epimerase/dehydratase                  | NA   | 1.065 | 4.24E-01 |
| MSMEG_0992 | 2-nitropropane dioxygenase, NPD                      | NA   | 0.809 | 1.24E-01 |
| MSMEG_0993 | histidine kinase                                     | NA   | 1.107 | 3.59E-01 |
| MSMEG_0994 | DNA-binding response regulator ResD                  | resD | 1.096 | 5.36E-01 |
| MSMEG_0995 | glycosyl transferase, family protein 2               | NA   | 0.951 | 8.74E-01 |
| MSMEG_0996 | conserved hypothetical protein                       | NA   | 1.042 | 6.78E-01 |
| MSMEG_0997 | conserved hypothetical protein                       | NA   | 1.214 | 4.69E-01 |
| MSMEG_0998 | oxidoreductase, molybdopterin binding                | NA   | 1.091 | 6.64E-01 |
| MSMEG_0999 | integral membrane protein                            | NA   | 1.396 | 1.20E-03 |

|            |                                                                                           |      |       |          |
|------------|-------------------------------------------------------------------------------------------|------|-------|----------|
| MSMEG_1000 | hypothetical protein                                                                      | NA   | 0.931 | 6.19E-01 |
| MSMEG_1001 | acetyltransferase, gnat family protein, putative                                          | NA   | 1.188 | 1.80E-01 |
| MSMEG_1004 | This is the transposed copy of the gene fragment that was disrupted by an IS1096 element  | NA   | 1.108 | 4.57E-01 |
| MSMEG_1060 | putative Lsr2 protein                                                                     | NA   | 1.168 | 1.92E-01 |
| MSMEG_1061 | phosphohydrolase                                                                          | NA   | 1.228 | 6.16E-02 |
| MSMEG_1062 | O-succinylbenzoic acid--CoA ligase                                                        | NA   | 0.931 | 5.89E-01 |
| MSMEG_1063 | conserved hypothetical protein                                                            | NA   | 1.054 | 2.80E-01 |
| MSMEG_1064 | phosphate/sulphate permease                                                               | NA   | 1.673 | 1.20E-03 |
| MSMEG_1065 | conserved hypothetical protein                                                            | NA   | 1.567 | 4.75E-03 |
| MSMEG_1066 | conserved hypothetical protein                                                            | NA   | 1.493 | 3.54E-03 |
| MSMEG_1067 | conserved hypothetical protein                                                            | NA   | 1.391 | 9.81E-02 |
| MSMEG_1068 | regulatory protein                                                                        | NA   | 1.214 | 1.21E-01 |
| MSMEG_1069 | amino acid permease-associated region                                                     | NA   | 0.958 | 7.75E-01 |
| MSMEG_1070 | 3-oxoacyl-[acyl-carrier-protein] reductase                                                | NA   | 1.020 | 8.22E-01 |
| MSMEG_1071 | 3-oxoacyl-[acyl-carrier-protein] reductase                                                | NA   | 0.842 | 1.82E-01 |
| MSMEG_1072 | agmatinase                                                                                | speB | 0.937 | 5.40E-01 |
| MSMEG_1073 | oxidoreductase, short-chain dehydrogenase/reductase family protein                        | NA   | 1.152 | 1.06E-01 |
| MSMEG_1074 | polysaccharide deacetylase                                                                | NA   | 0.855 | 1.40E-01 |
| MSMEG_1075 | naphthoate synthase                                                                       | menB | 0.936 | 2.70E-01 |
| MSMEG_1076 | conserved hypothetical protein                                                            | NA   | 1.052 | 8.70E-01 |
| MSMEG_1077 | conserved hypothetical protein                                                            | NA   | 0.987 | 8.99E-01 |
| MSMEG_1078 | hydrolase                                                                                 | NA   | 1.018 | 8.06E-01 |
| MSMEG_1079 | hypothetical protein                                                                      | NA   | 1.577 | 3.44E-01 |
| MSMEG_1080 | large subunit of N,N-dimethylformamidase                                                  | NA   | 1.630 | 4.87E-01 |
| MSMEG_1081 | hypothetical protein                                                                      | NA   | 1.124 | 3.47E-01 |
| MSMEG_1082 | putative response regulator                                                               | NA   | 0.930 | 2.75E-01 |
| MSMEG_1083 | hypothetical protein                                                                      | NA   | 0.995 | 9.88E-01 |
| MSMEG_1084 | peptide/opine/nickel uptake family protein ABC transporter, periplasmic substrate-binding | NA   | 0.967 | 7.96E-01 |
| MSMEG_1085 | dipeptide transport system permease protein DppB                                          | NA   | 1.135 | 2.13E-01 |
| MSMEG_1086 | ABC transporter permease protein                                                          | NA   | 1.237 | 5.90E-01 |
| MSMEG_1087 | oligopeptide ABC transporter ATP-binding protein; this gene contains a frame shift wh     | NA   | 0.956 | 6.24E-02 |



|            |                                                                                         |      |       |          |
|------------|-----------------------------------------------------------------------------------------|------|-------|----------|
| MSMEG_1087 | oligopeptide ABC transporter ATP-binding protein; this gene contains a frame shift wh   | NA   | 1.043 | 3.31E-01 |
| MSMEG_1088 | glutamyl-tRNA(Gln)/aspartyl-tRNA(Asn) amidotransferase, A subunit                       | gatA | 0.956 | 7.36E-01 |
| MSMEG_1089 | hypothetical protein                                                                    | NA   | 0.944 | 4.80E-01 |
| MSMEG_1090 | amidase                                                                                 | NA   | 1.162 | 2.37E-01 |
| MSMEG_1091 | urease accessory protein UreE 1                                                         | NA   | 1.980 | 4.70E-01 |
| MSMEG_1092 | urease accessory protein UreF                                                           | NA   | 0.843 | 4.07E-01 |
| MSMEG_1093 | urease gamma/beta subunit                                                               | NA   | 0.915 | 6.42E-01 |
| MSMEG_1094 | urease, alpha subunit                                                                   | ureC | 0.968 | 9.25E-01 |
| MSMEG_1095 | urease accessory protein UreG                                                           | ureG | 6.695 | 3.95E-01 |
| MSMEG_1096 | urease accessory protein UreD, putative                                                 | NA   | 0.917 | 3.19E-01 |
| MSMEG_1097 | glycosyl transferase, group 2 family protein                                            | NA   | 1.437 | 4.68E-01 |
| MSMEG_1098 | acyl-CoA synthase                                                                       | NA   | 0.998 | 9.91E-01 |
| MSMEG_1099 | hypothetical protein                                                                    | NA   | 1.169 | 2.16E-01 |
| MSMEG_1100 | dgpf protein                                                                            | NA   | 1.080 | 4.67E-01 |
| MSMEG_1101 | hypothetical protein                                                                    | NA   | 0.945 | 8.13E-01 |
| MSMEG_1102 | twin-arginine translocation pathway signal                                              | NA   | 1.344 | 1.79E-01 |
| MSMEG_1103 | O-succinylbenzoate synthase                                                             | NA   | 1.070 | 4.43E-01 |
| MSMEG_1104 | hypothetical protein                                                                    | NA   | 1.279 | 5.11E-02 |
| MSMEG_1105 | phthiodiolone ketoreductase; this gene contains a frame shift which is not the result o | NA   | 0.882 | 5.07E-01 |
| MSMEG_1105 | phthiodiolone ketoreductase; this gene contains a frame shift which is not the result o | NA   | 1.486 | 4.20E-02 |
| MSMEG_1106 | transcriptional regulator, AraC family protein                                          | NA   | 0.983 | 6.30E-01 |
| MSMEG_1107 | isonitrile hydratase, putative                                                          | NA   | 0.983 | 9.53E-01 |
| MSMEG_1108 | hydrolase, alpha/beta fold family protein                                               | NA   | 1.027 | 6.97E-01 |
| MSMEG_1109 | 2-oxoglutarate decarboxylase                                                            | NA   | 1.331 | 1.09E-01 |
| MSMEG_1110 | probable conserved transmembrane protein                                                | NA   | 1.208 | 1.21E-01 |
| MSMEG_1111 | conserved hypothetical protein                                                          | NA   | 1.077 | 2.19E-01 |
| MSMEG_1112 | aconitate hydratase, putative                                                           | NA   | 1.197 | 5.86E-01 |
| MSMEG_1113 | glycosyl transferase                                                                    | NA   | 0.974 | 8.60E-01 |
| MSMEG_1114 | short chain dehydrogenase                                                               | NA   | 2.463 | 3.35E-02 |
| MSMEG_1115 | menaquinone biosynthesis methyltransferase UbiE                                         | NA   | 1.025 | 7.48E-01 |
| MSMEG_1116 | gamma-glutamylisopropylamide synthetase                                                 | NA   | 0.740 | 6.06E-02 |

|            |                                                                                  |    |       |          |
|------------|----------------------------------------------------------------------------------|----|-------|----------|
| MSMEG_1117 | transcriptional regulator                                                        | NA | 0.775 | 8.28E-02 |
| MSMEG_1118 | amino acid permease                                                              | NA | 0.734 | 8.76E-02 |
| MSMEG_1119 | glutamine amidotransferase, class I                                              | NA | 1.150 | 4.64E-01 |
| MSMEG_1120 | nitrilase/cyanide hydratase and apolipoprotein N-acyltransferase                 | NA | 0.681 | 1.74E-01 |
| MSMEG_1121 | conserved hypothetical protein                                                   | NA | 1.540 | 5.62E-01 |
| MSMEG_1122 | hypothetical protein                                                             | NA | 0.724 | 4.61E-02 |
| MSMEG_1123 | cobalamin synthesis protein                                                      | NA | 1.108 | 4.16E-01 |
| MSMEG_1124 | putative ferredoxin FdxA                                                         | NA | 1.091 | 1.29E-01 |
| MSMEG_1125 | regulatory protein, ArsR                                                         | NA | 1.209 | 1.21E-01 |
| MSMEG_1126 | hypothetical protein                                                             | NA | 0.959 | 6.82E-01 |
| MSMEG_1127 | probable conserved transmembrane protein                                         | NA | 1.006 | 8.78E-01 |
| MSMEG_1128 | conserved hypothetical protein                                                   | NA | 1.229 | 3.28E-01 |
| MSMEG_1129 | D-amino-acid dehydrogenase                                                       | NA | 1.082 | 8.72E-01 |
| MSMEG_1130 | hypothetical protein                                                             | NA | 1.171 | 5.09E-01 |
| MSMEG_1131 | tryptophan-rich sensory protein                                                  | NA | 1.643 | 1.45E-01 |
| MSMEG_1132 | FAD binding domain, putative                                                     | NA | 1.328 | 2.43E-02 |
| MSMEG_1133 | bifunctional short chain isoprenyl diphosphate synthase                          | NA | 1.030 | 1.65E-01 |
| MSMEG_1134 | putative protease HtpX                                                           | NA | 0.983 | 7.69E-01 |
| MSMEG_1135 | hypothetical protein                                                             | NA | 2.379 | 3.34E-01 |
| MSMEG_1136 | conserved hypothetical protein                                                   | NA | 0.847 | 2.10E-02 |
| MSMEG_1137 | amino acid permease-associated region                                            | NA | 0.931 | 5.67E-01 |
| MSMEG_1138 | alcohol dehydrogenase 1                                                          | NA | 1.198 | 4.45E-01 |
| MSMEG_1139 | transcription regulator                                                          | NA | 1.022 | 8.40E-01 |
| MSMEG_1140 | glycerol-3-phosphate dehydrogenase 2 [NAD(P)+] (NAD(P)H-dependent glycerol-3-phc | NA | 1.316 | 3.74E-02 |
| MSMEG_1141 | ABC-transporter integral membrane protein                                        | NA | 0.905 | 3.55E-01 |
| MSMEG_1142 | ABC-transporter integral membrane protein                                        | NA | 1.527 | 5.16E-01 |
| MSMEG_1143 | mce related protein                                                              | NA | 0.815 | 4.93E-01 |
| MSMEG_1144 | virulence factor Mce family protein                                              | NA | 0.560 | 6.11E-03 |
| MSMEG_1145 | virulence factor Mce family protein                                              | NA | 0.839 | 4.49E-01 |
| MSMEG_1146 | virulence factor Mce family protein                                              | NA | 0.814 | 3.49E-01 |
| MSMEG_1147 | mce related protein                                                              | NA | 0.746 | 6.52E-02 |

|            |                                                                                      |      |       |          |
|------------|--------------------------------------------------------------------------------------|------|-------|----------|
| MSMEG_1148 | mce related protein                                                                  | NA   | 0.904 | 7.20E-01 |
| MSMEG_1149 | conserved hypothetical protein                                                       | NA   | 0.802 | 5.60E-02 |
| MSMEG_1150 | conserved hypothetical protein                                                       | NA   | 0.967 | 9.22E-01 |
| MSMEG_1151 | DNA-binding protein                                                                  | NA   | 0.845 | 1.01E-03 |
| MSMEG_1152 | citrate-proton symporter                                                             | NA   | 1.037 | 3.64E-01 |
| MSMEG_1153 | FAD dependent oxidoreductase                                                         | NA   | 0.888 | 2.18E-01 |
| MSMEG_1154 | formyl-coenzyme A transferase                                                        | NA   | 0.851 | 5.04E-02 |
| MSMEG_1155 | carnitiny-CoA dehydratase                                                            | NA   | 0.974 | 9.18E-01 |
| MSMEG_1156 | dihydrodipicolinate synthetase                                                       | NA   | 0.851 | 3.15E-01 |
| MSMEG_1157 | short chain dehydrogenase                                                            | NA   | 1.077 | 7.03E-01 |
| MSMEG_1158 | 5-oxovalerate dehydrogenase                                                          | NA   | 0.875 | 3.49E-01 |
| MSMEG_1159 | ABC transporter component A                                                          | NA   | 1.033 | 9.05E-01 |
| MSMEG_1160 | ABC-type nitrate/sulfonate/bicarbonate transport system ATPase component             | NA   | 1.210 | 5.20E-01 |
| MSMEG_1161 | taurine transport system permease protein TauC                                       | NA   | 1.058 | 4.59E-01 |
| MSMEG_1162 | nitrilotriacetate monooxygenase component A                                          | NA   | 0.988 | 8.91E-01 |
| MSMEG_1163 | hypothetical protein                                                                 | NA   | 1.026 | 5.55E-01 |
| MSMEG_1164 | putative transporter; this region contains one or more premature stops and/or frames | NA   | 1.027 | 6.27E-01 |
| MSMEG_1164 | putative transporter; this region contains one or more premature stops and/or frames | NA   | 1.198 | 1.87E-01 |
| MSMEG_1164 | putative transporter; this region contains one or more premature stops and/or frames | NA   | 4.318 | 2.20E-01 |
| MSMEG_1165 | conserved hypothetical protein                                                       | NA   | 0.893 | 2.41E-01 |
| MSMEG_1167 | cytochrome P450                                                                      | NA   | 0.885 | 3.41E-01 |
| MSMEG_1168 | putative transcriptional regulator                                                   | NA   | 1.422 | 1.89E-01 |
| MSMEG_1169 | integral membrane transport protein                                                  | NA   | 1.282 | 5.58E-02 |
| MSMEG_1170 | conserved domain protein                                                             | NA   | 1.547 | 5.51E-02 |
| MSMEG_1171 | Low molecular weight phosphotyrosine protein phosphatase                             | NA   | 1.076 | 7.55E-01 |
| MSMEG_1172 | arsenical-resistance protein                                                         | arsB | 1.169 | 1.25E-01 |
| MSMEG_1173 | transcriptional regulator, ArsR family protein                                       | NA   | 1.238 | 1.15E-01 |
| MSMEG_1174 | cadmium inducible protein cadI                                                       | NA   | 0.960 | 6.80E-01 |
| MSMEG_1175 | putative transcriptional regulatory protein                                          | NA   | 1.318 | 2.85E-02 |
| MSMEG_1176 | hypothetical protein                                                                 | NA   | 0.875 | 4.63E-03 |
| MSMEG_1177 | cytosine/purines/uracil/thiamine/allantoin permease family protein                   | NA   | 1.261 | 4.62E-01 |

|            |                                                 |      |       |          |
|------------|-------------------------------------------------|------|-------|----------|
| MSMEG_1178 | transcriptional regulator                       | NA   | 0.872 | 5.37E-02 |
| MSMEG_1179 | urocanate hydratase                             | hutU | 1.187 | 5.69E-01 |
| MSMEG_1180 | N-carbamoyl-L-amino acid hydrolase              | NA   | 1.339 | 1.71E-01 |
| MSMEG_1181 | formiminoglutamate deiminase                    | hutF | 0.854 | 2.23E-01 |
| MSMEG_1182 | imidazolonepropionase                           | hutI | 1.041 | 8.35E-01 |
| MSMEG_1183 | histidine ammonia-lyase                         | hutH | 2.325 | 4.44E-01 |
| MSMEG_1184 | serine esterase, cutinase family protein        | NA   | 1.034 | 8.12E-01 |
| MSMEG_1185 | transcriptional regulator, AsnC family protein  | NA   | 1.165 | 5.94E-01 |
| MSMEG_1186 | putative permease                               | NA   | 1.117 | 5.23E-01 |
| MSMEG_1187 | N-acyl-D-aspartate deacylase                    | NA   | 1.068 | 2.33E-01 |
| MSMEG_1188 | conserved hypothetical protein                  | NA   | 1.176 | 8.18E-02 |
| MSMEG_1189 | conserved hypothetical protein                  | NA   | 0.989 | 8.28E-01 |
| MSMEG_1190 | serine/threonine-protein kinase PknD            | NA   | 1.428 | 9.87E-02 |
| MSMEG_1191 | hypothetical protein                            | NA   | 1.034 | 7.34E-01 |
| MSMEG_1192 | M23 peptidase domain protein                    | NA   | 1.110 | 7.53E-01 |
| MSMEG_1193 | TROVE domain protein                            | NA   | 1.649 | 5.25E-02 |
| MSMEG_1194 | hypothetical protein                            | NA   | 0.936 | 2.96E-01 |
| MSMEG_1195 | conserved hypothetical protein                  | NA   | 1.034 | 5.75E-01 |
| MSMEG_1196 | SNF2 domain protein                             | NA   | 1.323 | 3.56E-02 |
| MSMEG_1197 | transcriptional regulator, LuxR family protein  | NA   | 0.797 | 4.56E-02 |
| MSMEG_1198 | hypothetical protein                            | NA   | 1.467 | 4.80E-03 |
| MSMEG_1199 | conserved hypothetical protein                  | NA   | 1.114 | 2.36E-01 |
| MSMEG_1200 | serine/threonine-protein kinase PknD            | NA   | 0.867 | 7.88E-02 |
| MSMEG_1201 | hypothetical protein                            | NA   | 1.176 | 2.33E-01 |
| MSMEG_1202 | hypothetical protein                            | NA   | 0.370 | 1.31E-03 |
| MSMEG_1203 | methoxy mycolic acid synthase 1                 | NA   | 0.761 | 3.86E-02 |
| MSMEG_1204 | 3-oxoacyl-[acyl-carrier-protein] synthase 2     | NA   | 1.113 | 4.09E-01 |
| MSMEG_1205 | cyclopropane-fatty-acyl-phospholipid synthase 1 | NA   | 0.955 | 6.33E-01 |
| MSMEG_1206 | hypothetical protein                            | NA   | 1.120 | 2.52E-02 |
| MSMEG_1207 | glycosyltransferase, group I                    | NA   | 0.958 | 6.47E-01 |
| MSMEG_1208 | glycosyltransferase, group I                    | NA   | 0.941 | 4.41E-01 |

|            |                                                                                        |      |       |          |
|------------|----------------------------------------------------------------------------------------|------|-------|----------|
| MSMEG_1209 | glycosidase                                                                            | NA   | 0.998 | 9.85E-01 |
| MSMEG_1210 | conserved hypothetical protein                                                         | NA   | 1.248 | 6.86E-02 |
| MSMEG_1211 | Fatty acid desaturase                                                                  | NA   | 0.766 | 6.20E-03 |
| MSMEG_1212 | hypothetical protein                                                                   | NA   | 0.820 | 1.61E-01 |
| MSMEG_1213 | cytochrome P450 monooxygenase                                                          | NA   | 1.084 | 2.33E-01 |
| MSMEG_1214 | oxidoreductase                                                                         | NA   | 1.728 | 3.06E-01 |
| MSMEG_1215 | serine/threonine-protein kinase PknE, putative                                         | NA   | 1.138 | 1.30E-02 |
| MSMEG_1216 | ABC-type transport system periplasmic substrate-binding protein                        | NA   | 1.008 | 9.70E-01 |
| MSMEG_1217 | ABC-type transport system ATP-binding protein I                                        | NA   | 1.252 | 1.31E-01 |
| MSMEG_1218 | ABC-type transport system ATP-binding protein II                                       | NA   | 0.874 | 3.48E-01 |
| MSMEG_1219 | ABC-type transport system permease protein II                                          | NA   | 1.050 | 6.90E-02 |
| MSMEG_1220 | ABC-type transport system permease protein I                                           | NA   | 0.940 | 1.57E-01 |
| MSMEG_1221 | rifampin ADP-ribosyl transferase                                                       | NA   | 1.080 | 3.27E-01 |
| MSMEG_1222 | ISMsm6, transposase                                                                    | NA   | 1.289 | 4.04E-01 |
| MSMEG_1223 | hypothetical protein                                                                   | NA   | 1.153 | 2.15E-01 |
| MSMEG_1224 | rifampin ADP-ribosyl transferase                                                       | NA   | 1.042 | 7.81E-01 |
| MSMEG_1225 | conserved hypothetical protein                                                         | NA   | 0.706 | 6.64E-02 |
| MSMEG_1226 | sulfatase-modifying factor 1                                                           | NA   | 1.076 | 6.70E-01 |
| MSMEG_1227 | transcriptional regulator, GntR family protein                                         | NA   | 0.890 | 1.25E-02 |
| MSMEG_1228 | sulfatase                                                                              | NA   | 0.902 | 5.45E-01 |
| MSMEG_1229 | DNA gyrase, B subunit                                                                  | gyrB | 1.357 | 4.52E-01 |
| MSMEG_1230 | hypothetical protein                                                                   | NA   | 1.216 | 4.02E-01 |
| MSMEG_1231 | inner membrane protein YidH                                                            | NA   | 0.822 | 4.50E-02 |
| MSMEG_1232 | ABC transporter substrate-binding protein                                              | NA   | 0.977 | 6.92E-01 |
| MSMEG_1233 | ABC transporter permease protein; this gene contains a frame shift which is not the re | NA   | 0.927 | 4.73E-01 |
| MSMEG_1234 | taurine import ATP-binding protein TauB                                                | NA   | 1.137 | 2.08E-01 |
| MSMEG_1235 | sulfate permease                                                                       | NA   | 1.344 | 9.25E-02 |
| MSMEG_1236 | Mpr protein                                                                            | NA   | 0.840 | 2.04E-01 |
| MSMEG_1237 | hypothetical protein                                                                   | NA   | 0.894 | 3.55E-01 |
| MSMEG_1238 | type III restriction enzyme, res subunit                                               | NA   | 0.849 | 1.42E-02 |
| MSMEG_1240 | conserved hypothetical protein                                                         | NA   | 0.798 | 4.03E-01 |

|            |                                                                                          |      |       |          |
|------------|------------------------------------------------------------------------------------------|------|-------|----------|
| MSMEG_1241 | conserved hypothetical protein                                                           | NA   | 0.740 | 4.33E-02 |
| MSMEG_1242 | cysteine desulfurase IscS                                                                | iscS | 0.970 | 5.04E-01 |
| MSMEG_1243 | conserved hypothetical protein                                                           | NA   | 0.973 | 3.14E-01 |
| MSMEG_1244 | conserved hypothetical protein                                                           | NA   | 0.896 | 5.45E-02 |
| MSMEG_1245 | phosphoadenosine phosphosulfate reductase                                                | NA   | 0.657 | 1.06E-03 |
| MSMEG_1246 | conserved hypothetical protein                                                           | NA   | 0.705 | 7.94E-03 |
| MSMEG_1247 | conserved hypothetical protein                                                           | NA   | 0.911 | 1.09E-02 |
| MSMEG_1248 | hypothetical protein                                                                     | NA   | 0.839 | 2.39E-01 |
| MSMEG_1249 | ISMsm7, transposase orfB                                                                 | NA   | 1.027 | 8.24E-01 |
| MSMEG_1250 | ISMsm7, transposase orfA                                                                 | NA   | 1.044 | 6.14E-01 |
| MSMEG_1251 | conserved hypothetical protein                                                           | NA   | 0.930 | 5.67E-01 |
| MSMEG_1252 | conserved hypothetical protein                                                           | NA   | 0.829 | 1.13E-02 |
| MSMEG_1253 | conserved hypothetical protein                                                           | NA   | 0.925 | 3.94E-01 |
| MSMEG_1254 | DEAD/DEAH box helicase                                                                   | NA   | 0.793 | 2.28E-03 |
| MSMEG_1255 | UvrD/Rep helicase                                                                        | NA   | 0.737 | 6.48E-03 |
| MSMEG_1256 | hypothetical protein                                                                     | NA   | 0.741 | 5.35E-03 |
| MSMEG_1259 | hypothetical protein                                                                     | NA   | 1.132 | 1.95E-02 |
| MSMEG_1260 | hypothetical protein                                                                     | NA   | 1.019 | 8.07E-01 |
| MSMEG_1261 | hypothetical protein                                                                     | NA   | 1.029 | 6.05E-01 |
| MSMEG_1262 | conserved hypothetical protein                                                           | NA   | 0.941 | 9.99E-02 |
| MSMEG_1263 | conserved hypothetical protein                                                           | NA   | 0.612 | 1.87E-02 |
| MSMEG_1264 | prophage Lp1 protein 5                                                                   | NA   | 0.871 | 3.63E-01 |
| MSMEG_1265 | conserved hypothetical protein                                                           | NA   | 0.763 | 7.12E-03 |
| MSMEG_1266 | ankyrin-repeat containing protein                                                        | NA   | 1.105 | 5.39E-01 |
| MSMEG_1267 | putative ribosylglycohydrolase; this gene contains a frame shift which is not the result | NA   | 1.411 | 2.30E-01 |
| MSMEG_1268 | nudix hydrolase                                                                          | NA   | 1.039 | 7.25E-01 |
| MSMEG_1269 | Ser/Thr protein phosphatase family protein                                               | NA   | 1.132 | 2.54E-01 |
| MSMEG_1270 | hypothetical protein                                                                     | NA   | 1.170 | 9.20E-02 |
| MSMEG_1271 | hypothetical protein                                                                     | NA   | 1.274 | 4.32E-01 |
| MSMEG_1272 | putative ribosylglycohydrolase                                                           | NA   | 1.198 | 5.60E-02 |
| MSMEG_1273 | conserved hypothetical protein                                                           | NA   | 1.218 | 4.38E-02 |

|            |                                                                  |      |       |          |
|------------|------------------------------------------------------------------|------|-------|----------|
| MSMEG_1274 | gluconolactonase                                                 | NA   | 1.833 | 3.65E-01 |
| MSMEG_1275 | HNH nuclease, putative                                           | NA   | 1.045 | 5.94E-01 |
| MSMEG_1276 | hypothetical protein                                             | NA   | 1.001 | 9.92E-01 |
| MSMEG_1277 | hypothetical protein                                             | NA   | 1.395 | 3.17E-02 |
| MSMEG_1278 | death-on-curing protein                                          | NA   | 1.214 | 8.25E-02 |
| MSMEG_1279 | conserved hypothetical protein                                   | NA   | 1.174 | 6.75E-02 |
| MSMEG_1280 | hypothetical cytosolic protein                                   | NA   | 1.021 | 7.43E-01 |
| MSMEG_1281 | conserved hypothetical protein                                   | NA   | 1.110 | 4.20E-01 |
| MSMEG_1282 | hypothetical cytosolic protein                                   | NA   | 1.206 | 2.28E-01 |
| MSMEG_1283 | probable ribbon-helix-helix transcription factor, family protein | NA   | 0.005 | 2.15E-08 |
| MSMEG_1284 | PIN domain protein                                               | NA   | 1.845 | 2.08E-01 |
| MSMEG_1285 | tetratricopeptide repeat family protein                          | NA   | 0.983 | 7.32E-01 |
| MSMEG_1286 | sulfatase family protein                                         | NA   | 1.040 | 4.39E-01 |
| MSMEG_1287 | cyclase/dehydrase superfamily protein                            | NA   | 0.868 | 2.55E-01 |
| MSMEG_1288 | conserved hypothetical protein                                   | NA   | 0.958 | 6.41E-01 |
| MSMEG_1289 | conserved hypothetical protein                                   | NA   | 1.129 | 5.01E-02 |
| MSMEG_1290 | dihydroxy-acid dehydratase                                       | ilvD | 2.103 | 1.02E-01 |
| MSMEG_1291 | putative oxidoreductase                                          | NA   | 1.099 | 5.80E-01 |
| MSMEG_1292 | FAD binding domain in molybdopterin dehydrogenase protein        | NA   | 0.888 | 4.76E-01 |
| MSMEG_1293 | xanthine/uracil permeases family protein                         | NA   | 0.784 | 2.68E-01 |
| MSMEG_1294 | allantoicase                                                     | NA   | 8.067 | 3.38E-01 |
| MSMEG_1295 | transthyretin                                                    | NA   | 0.995 | 9.66E-01 |
| MSMEG_1296 | uricase                                                          | NA   | 0.953 | 7.65E-01 |
| MSMEG_1297 | hydroxydechloroatrazine ethylaminohydrolase                      | NA   | 1.806 | 2.75E-01 |
| MSMEG_1298 | guanine deaminase                                                | NA   | 1.044 | 8.50E-02 |
| MSMEG_1299 | oxidoreductase, 2OG-Fe(II) oxygenase family protein              | NA   | 1.278 | 3.48E-01 |
| MSMEG_1300 | hypothetical protein                                             | NA   | 0.972 | 8.27E-01 |
| MSMEG_1301 | NanT3                                                            | NA   | 1.686 | 2.48E-01 |
| MSMEG_1302 | alkylphosphonate uptake protein                                  | NA   | 0.977 | 9.11E-01 |
| MSMEG_1303 | putative transcriptional regulator                               | NA   | 2.186 | 2.73E-01 |
| MSMEG_1304 | rhizopine catabolism protein                                     | NA   | 1.583 | 2.98E-01 |

|            |                                                                                   |      |       |          |
|------------|-----------------------------------------------------------------------------------|------|-------|----------|
| MSMEG_1305 | TetR family protein regulatory protein                                            | NA   | 1.194 | 3.15E-01 |
| MSMEG_1306 | aldehyde dehydrogenase (NAD) family protein                                       | NA   | 0.926 | 5.41E-01 |
| MSMEG_1307 | EthD protein                                                                      | NA   | 1.256 | 2.07E-01 |
| MSMEG_1308 | peptidase S15                                                                     | NA   | 1.124 | 1.20E-01 |
| MSMEG_1309 | conserved hypothetical protein                                                    | NA   | 0.883 | 1.89E-01 |
| MSMEG_1311 | oligopeptide transporter, OPT family protein                                      | NA   | 1.025 | 6.07E-01 |
| MSMEG_1312 | hypothetical protein                                                              | NA   | 0.822 | 1.71E-01 |
| MSMEG_1313 | secreted protein                                                                  | NA   | 1.208 | 9.17E-03 |
| MSMEG_1314 | hypothetical protein                                                              | NA   | 1.142 | 1.21E-02 |
| MSMEG_1315 | transporter, small conductance mechanosensitive ion channel (MscS) family protein | NA   | 1.189 | 5.12E-01 |
| MSMEG_1316 | peptide chain release factor 3                                                    | prfC | 1.158 | 1.36E-01 |
| MSMEG_1317 | transcriptional regulator                                                         | NA   | 1.116 | 4.06E-01 |
| MSMEG_1318 | polysaccharide deacetylase family protein                                         | NA   | 1.062 | 4.96E-01 |
| MSMEG_1319 | Asp/Glu racemase                                                                  | NA   | 1.076 | 7.50E-01 |
| MSMEG_1320 | major facilitator superfamily protein MFS_1                                       | NA   | 1.073 | 1.99E-01 |
| MSMEG_1321 | 5-carboxymethyl-2-hydroxyruconate delta-isomerase                                 | NA   | 0.935 | 7.77E-01 |
| MSMEG_1322 | ErfK/YbiS/YcfS/YnhG family protein                                                | NA   | 1.014 | 3.54E-01 |
| MSMEG_1323 | hypothetical protein                                                              | NA   | 1.154 | 2.32E-01 |
| MSMEG_1324 | hypothetical protein                                                              | NA   | 1.497 | 1.47E-01 |
| MSMEG_1325 | exodeoxyribonuclease V, alpha subunit                                             | recD | 1.055 | 7.38E-01 |
| MSMEG_1326 | hypothetical protein                                                              | NA   | 1.283 | 4.42E-01 |
| MSMEG_1327 | exodeoxyribonuclease V, beta subunit                                              | recB | 0.819 | 4.36E-02 |
| MSMEG_1328 | exodeoxyribonuclease V, gamma subunit                                             | recC | 0.866 | 3.73E-02 |
| MSMEG_1329 | major facilitator superfamily protein MFS_1, putative                             | NA   | 1.160 | 3.33E-01 |
| MSMEG_1330 | MarR-family protein transcriptional regulator                                     | NA   | 1.162 | 3.64E-02 |
| MSMEG_1331 | enoyl-CoA hydratase                                                               | NA   | 1.047 | 6.31E-01 |
| MSMEG_1332 | conserved hypothetical protein                                                    | NA   | 0.939 | 3.75E-01 |
| MSMEG_1333 | conserved hypothetical protein                                                    | NA   | 1.783 | 9.94E-03 |
| MSMEG_1334 | metallo-beta-lactamase family protein                                             | NA   | 1.196 | 3.88E-03 |
| MSMEG_1335 | transcriptional regulator, BadM/Rrf2 family protein                               | NA   | 1.705 | 1.70E-01 |
| MSMEG_1336 | flavoheмоprotein, putative                                                        | NA   | 1.359 | 1.97E-02 |



|            |                                                                                             |      |       |          |
|------------|---------------------------------------------------------------------------------------------|------|-------|----------|
| MSMEG_1339 | ribosomal protein L33                                                                       | rpmG | 0.944 | 6.92E-01 |
| MSMEG_1340 | conserved hypothetical protein                                                              | NA   | 0.927 | 2.80E-01 |
| MSMEG_1341 | MaoC family protein                                                                         | NA   | 1.297 | 7.90E-03 |
| MSMEG_1342 | conserved hypothetical protein                                                              | NA   | 1.375 | 1.34E-02 |
| MSMEG_1344 | translocase                                                                                 | NA   | 1.068 | 4.06E-01 |
| MSMEG_1345 | transcription antitermination protein NusG                                                  | NA   | 1.164 | 3.67E-02 |
| MSMEG_1346 | ribosomal protein L11                                                                       | rplK | 1.105 | 5.09E-01 |
| MSMEG_1347 | ribosomal protein L1                                                                        | rplA | 1.174 | 2.92E-02 |
| MSMEG_1348 | RNA polymerase ECF-subfamily protein sigma factor                                           | NA   | 0.975 | 9.29E-01 |
| MSMEG_1349 | dgpf domain family protein                                                                  | NA   | 1.037 | 3.14E-01 |
| MSMEG_1350 | cyclopropane-fatty-acyl-phospholipid synthase 1                                             | NA   | 0.876 | 4.29E-02 |
| MSMEG_1351 | cyclopropane-fatty-acyl-phospholipid synthase 1                                             | NA   | 0.775 | 1.02E-03 |
| MSMEG_1352 | hydrolase, alpha/beta fold family protein                                                   | NA   | 1.064 | 2.92E-01 |
| MSMEG_1353 | ABC1 family protein                                                                         | NA   | 1.102 | 3.22E-02 |
| MSMEG_1354 | conserved hypothetical protein; this gene contains a frame shift which is not the result of | NA   | 0.817 | 4.65E-02 |
| MSMEG_1355 | transcriptional regulator, TetR family protein                                              | NA   | 1.310 | 1.13E-01 |
| MSMEG_1356 | conserved hypothetical protein                                                              | NA   | 1.174 | 2.82E-02 |
| MSMEG_1357 | conserved hypothetical protein                                                              | NA   | 0.999 | 9.80E-01 |
| MSMEG_1358 | conserved hypothetical protein                                                              | NA   | 1.286 | 2.83E-01 |
| MSMEG_1359 | DeoR-family protein transcriptional regulator                                               | NA   | 1.171 | 5.99E-01 |
| MSMEG_1360 | endonuclease/exonuclease/phosphatase                                                        | NA   | 1.181 | 2.05E-01 |
| MSMEG_1361 | alpha-mannosidase                                                                           | NA   | 1.018 | 7.33E-01 |
| MSMEG_1362 | conserved hypothetical protein                                                              | NA   | 1.016 | 8.25E-01 |
| MSMEG_1363 | glucokinase                                                                                 | NA   | 0.856 | 4.43E-02 |
| MSMEG_1364 | 50S ribosomal protein L10                                                                   | NA   | 0.943 | 2.23E-01 |
| MSMEG_1365 | ribosomal protein L7/L12                                                                    | rplL | 1.070 | 1.31E-01 |
| MSMEG_1366 | ABC transporter, ATP-binding protein                                                        | NA   | 0.670 | 1.26E-03 |
| MSMEG_1367 | DNA-directed RNA polymerase, beta subunit                                                   | rpoB | 1.377 | 4.74E-02 |
| MSMEG_1368 | DNA-directed RNA polymerase, beta' subunit                                                  | rpoC | 1.151 | 1.58E-01 |
| MSMEG_1369 | LacI-family protein transcriptional regulator                                               | NA   | 2.036 | 1.54E-03 |
| MSMEG_1370 | 2-deoxy-scyllo-inosamine dehydrogenase                                                      | NA   | 1.262 | 1.61E-01 |

|            |                                                                                          |      |       |          |
|------------|------------------------------------------------------------------------------------------|------|-------|----------|
| MSMEG_1371 | conserved hypothetical protein                                                           | NA   | 1.076 | 1.89E-01 |
| MSMEG_1372 | ABC transporter ATP-binding protein                                                      | NA   | 0.916 | 4.37E-01 |
| MSMEG_1373 | ribose/xylose/arabinose/galactoside ABC-type transport systems, permease compone         | NA   | 0.930 | 8.27E-01 |
| MSMEG_1374 | ribose ABC transporter, periplasmic binding protein                                      | NA   | 0.710 | 1.37E-01 |
| MSMEG_1375 | tagatose-1,6-bisphosphate aldolase GatY                                                  | NA   | 1.236 | 1.83E-02 |
| MSMEG_1376 | putative xylulose kinase                                                                 | NA   | 0.990 | 8.79E-01 |
| MSMEG_1377 | DeoR-family protein transcriptional regulator                                            | NA   | 1.150 | 2.54E-01 |
| MSMEG_1378 | 1-phosphofructokinase                                                                    | NA   | 1.335 | 3.35E-01 |
| MSMEG_1379 | conserved hypothetical protein                                                           | NA   | 1.076 | 3.53E-01 |
| MSMEG_1380 | transcriptional regulator                                                                | NA   | 1.097 | 2.98E-01 |
| MSMEG_1381 | MmpS5 protein                                                                            | NA   | 1.628 | 7.60E-03 |
| MSMEG_1382 | MmpL5 protein                                                                            | NA   | 1.423 | 6.44E-03 |
| MSMEG_1383 | endonuclease IV                                                                          | NA   | 0.973 | 6.70E-01 |
| MSMEG_1384 | conserved hypothetical protein                                                           | NA   | 1.075 | 8.28E-01 |
| MSMEG_1385 | PAP2 superfamily protein                                                                 | NA   | 0.935 | 3.63E-01 |
| MSMEG_1386 | hypothetical protein                                                                     | NA   | 1.278 | 4.64E-01 |
| MSMEG_1387 | putative acyl-CoA dehydrogenase                                                          | NA   | 0.887 | 5.41E-03 |
| MSMEG_1388 | enoyl-CoA hydratase                                                                      | NA   | 0.884 | 1.92E-01 |
| MSMEG_1389 | conserved hypothetical protein                                                           | NA   | 0.961 | 7.67E-01 |
| MSMEG_1390 | enoyl-CoA hydratase                                                                      | NA   | 1.046 | 7.24E-01 |
| MSMEG_1391 | transcriptional regulator, LysR family protein                                           | NA   | 1.445 | 1.76E-01 |
| MSMEG_1392 | alcohol dehydrogenase, class IV                                                          | NA   | 0.840 | 3.82E-01 |
| MSMEG_1393 | conserved hypothetical protein                                                           | NA   | 0.957 | 4.85E-01 |
| MSMEG_1394 | probable conserved transmembrane protein                                                 | NA   | 0.877 | 2.22E-01 |
| MSMEG_1395 | lipoprotein, putative                                                                    | NA   | 1.062 | 5.31E-01 |
| MSMEG_1396 | LprB protein                                                                             | NA   | 0.960 | 6.22E-01 |
| MSMEG_1397 | transcriptional regulator, TetR family protein                                           | NA   | 1.148 | 3.75E-02 |
| MSMEG_1398 | ribosomal protein S12                                                                    | rpsL | 1.052 | 5.35E-01 |
| MSMEG_1399 | ribosomal protein S7                                                                     | rpsG | 1.031 | 4.51E-01 |
| MSMEG_1400 | elongation factor G; this gene contains a frame shift which is not the result of sequenc | NA   | 0.989 | 9.67E-01 |
| MSMEG_1400 | elongation factor G; this gene contains a frame shift which is not the result of sequenc | NA   | 1.475 | 2.04E-01 |

|            |                                                                                          |      |       |          |
|------------|------------------------------------------------------------------------------------------|------|-------|----------|
| MSMEG_1401 | translation elongation factor Tu                                                         | tuf  | 1.122 | 6.95E-01 |
| MSMEG_1402 | hypothetical protein                                                                     | NA   | 1.083 | 3.68E-01 |
| MSMEG_1403 | cutinase superfamily protein                                                             | NA   | 1.429 | 3.85E-02 |
| MSMEG_1406 | conserved hypothetical protein                                                           | NA   | 0.940 | 4.83E-01 |
| MSMEG_1407 | Na(+)/H(+) antiporter; this gene contains a frame shift which is not the result of seque | NA   | 1.141 | 1.62E-01 |
| MSMEG_1407 | Na(+)/H(+) antiporter; this gene contains a frame shift which is not the result of seque | NA   | 1.510 | 2.60E-02 |
| MSMEG_1408 | arginine/ornithine antiporter; this region contains one or more premature stops and/c    | NA   | 0.949 | 4.12E-01 |
| MSMEG_1408 | arginine/ornithine antiporter; this region contains one or more premature stops and/c    | NA   | 1.021 | 7.53E-01 |
| MSMEG_1408 | arginine/ornithine antiporter; this region contains one or more premature stops and/c    | NA   | 1.232 | 1.32E-01 |
| MSMEG_1409 | arginine deiminase                                                                       | arcA | 1.224 | 4.20E-01 |
| MSMEG_1410 | carveol dehydrogenase                                                                    | NA   | 1.046 | 4.87E-01 |
| MSMEG_1411 | universal stress protein family protein                                                  | NA   | 1.327 | 3.29E-02 |
| MSMEG_1412 | amino acid permease                                                                      | NA   | 1.007 | 9.73E-01 |
| MSMEG_1413 | ornithine--oxo-acid transaminase                                                         | rocD | 0.801 | 6.65E-02 |
| MSMEG_1414 | Amidino transferase                                                                      | NA   | 0.800 | 8.32E-02 |
| MSMEG_1415 | AsnC-family protein transcriptional regulator                                            | NA   | 1.112 | 2.81E-01 |
| MSMEG_1416 | Pyridine nucleotide-disulphide oxidoreductase                                            | NA   | 1.110 | 6.28E-02 |
| MSMEG_1417 | glyoxalase family protein                                                                | NA   | 0.868 | 2.80E-01 |
| MSMEG_1418 | RNA polymerase ECF-type sigma factor                                                     | NA   | 0.843 | 2.46E-01 |
| MSMEG_1419 | conserved hypothetical protein                                                           | NA   | 1.543 | 3.23E-02 |
| MSMEG_1420 | probable transcriptional regulatory protein                                              | NA   | 1.481 | 2.78E-01 |
| MSMEG_1421 | hypothetical protein                                                                     | NA   | 0.879 | 2.90E-01 |
| MSMEG_1422 | conserved hypothetical protein                                                           | NA   | 0.895 | 1.97E-01 |
| MSMEG_1423 | radical SAM domain protein                                                               | NA   | 0.969 | 6.60E-01 |
| MSMEG_1424 | FMN-dependent dehydrogenase                                                              | NA   | 0.932 | 2.12E-01 |
| MSMEG_1425 | creatininase subfamily protein                                                           | NA   | 1.061 | 1.35E-01 |
| MSMEG_1426 | probable membrane sugar transferase                                                      | NA   | 0.988 | 8.97E-01 |
| MSMEG_1427 | transmembrane efflux protein                                                             | NA   | 0.843 | 3.75E-01 |
| MSMEG_1428 | glucose-methanol-choline oxidoreductase                                                  | NA   | 0.855 | 8.63E-03 |
| MSMEG_1429 | cytochrome P450-terp                                                                     | NA   | 1.161 | 5.69E-01 |
| MSMEG_1430 | transcriptional regulator, TetR family protein                                           | NA   | 1.076 | 7.01E-01 |

|            |                                                                                           |      |       |          |
|------------|-------------------------------------------------------------------------------------------|------|-------|----------|
| MSMEG_1431 | cytochrome P450-terp                                                                      | NA   | 1.432 | 4.21E-01 |
| MSMEG_1432 | acetylcholinesterase                                                                      | NA   | 1.208 | 8.58E-02 |
| MSMEG_1433 | thioesterase                                                                              | NA   | 1.040 | 7.27E-01 |
| MSMEG_1434 | conserved hypothetical protein                                                            | NA   | 1.178 | 4.06E-02 |
| MSMEG_1435 | ribosomal protein S10                                                                     | rpsJ | 1.006 | 9.52E-01 |
| MSMEG_1436 | ribosomal protein L3                                                                      | rplC | 0.866 | 1.24E-01 |
| MSMEG_1437 | ribosomal protein L4/L1 family protein                                                    | rplD | 1.035 | 4.44E-01 |
| MSMEG_1438 | ribosomal protein L23                                                                     | rplW | 0.967 | 4.67E-01 |
| MSMEG_1439 | ribosomal protein L2                                                                      | rplB | 1.071 | 6.33E-01 |
| MSMEG_1440 | ribosomal protein S19                                                                     | rpsS | 1.124 | 5.68E-02 |
| MSMEG_1441 | 50S ribosomal protein L22                                                                 | NA   | 1.136 | 1.01E-01 |
| MSMEG_1442 | ribosomal protein S3                                                                      | rpsC | 1.105 | 1.80E-01 |
| MSMEG_1443 | ribosomal protein L16                                                                     | rplP | 1.068 | 5.12E-01 |
| MSMEG_1444 | ribosomal protein L29                                                                     | rpmC | 1.035 | 5.10E-01 |
| MSMEG_1445 | 30S ribosomal protein S17                                                                 | NA   | 1.401 | 8.45E-03 |
| MSMEG_1446 | NTP pyrophosphohydrolase                                                                  | NA   | 1.588 | 3.91E-03 |
| MSMEG_1447 | transcriptional regulator, MerR family protein                                            | NA   | 1.492 | 2.27E-02 |
| MSMEG_1448 | integral membrane transporter                                                             | NA   | 1.509 | 3.57E-02 |
| MSMEG_1449 | fasciclin domain protein; this gene contains a frame shift which is not the result of seq | NA   | 0.915 | 8.03E-01 |
| MSMEG_1450 | hypothetical protein                                                                      | NA   | 1.048 | 6.21E-01 |
| MSMEG_1451 | arylsulfatase                                                                             | NA   | 0.892 | 2.57E-01 |
| MSMEG_1452 | sulfatase-modifying factor 1                                                              | NA   | 1.151 | 1.99E-01 |
| MSMEG_1453 | Citrate transporter                                                                       | NA   | 1.273 | 3.33E-01 |
| MSMEG_1454 | hypothetical protein                                                                      | NA   | 1.124 | 7.30E-01 |
| MSMEG_1455 | putative multidrug resistance protein                                                     | NA   | 1.058 | 8.10E-01 |
| MSMEG_1456 | hypothetical protein                                                                      | NA   | 1.424 | 9.36E-02 |
| MSMEG_1457 | conserved hypothetical protein                                                            | NA   | 0.898 | 4.36E-01 |
| MSMEG_1458 | tena/thi-4 family protein                                                                 | NA   | 0.987 | 9.44E-01 |
| MSMEG_1459 | Rieske [2Fe-2S] domain protein                                                            | NA   | 1.134 | 5.02E-01 |
| MSMEG_1460 | Pyridine nucleotide-disulphide oxidoreductase                                             | NA   | 1.117 | 6.46E-01 |
| MSMEG_1461 | 5-oxovalerate dehydrogenase                                                               | NA   | 1.019 | 3.09E-01 |

|            |                                                |      |       |          |
|------------|------------------------------------------------|------|-------|----------|
| MSMEG_1462 | ferredoxin                                     | NA   | 0.840 | 1.40E-01 |
| MSMEG_1463 | gamma-glutamyltranspeptidase                   | NA   | 1.022 | 9.33E-01 |
| MSMEG_1464 | translation initiation inhibitor               | NA   | 1.030 | 8.03E-01 |
| MSMEG_1465 | ribosomal protein L14                          | rplN | 1.244 | 1.43E-03 |
| MSMEG_1466 | ribosomal protein L24                          | rplX | 1.183 | 9.87E-03 |
| MSMEG_1467 | 50S ribosomal protein L5                       | NA   | 1.295 | 1.29E-01 |
| MSMEG_1468 | ribosomal protein S14p/S29e                    | rpsN | 1.248 | 3.35E-02 |
| MSMEG_1469 | ribosomal protein S8                           | rpsH | 1.092 | 3.04E-01 |
| MSMEG_1470 | 50S ribosomal protein L6                       | NA   | 1.125 | 5.57E-01 |
| MSMEG_1471 | ribosomal protein L18                          | rplR | 1.199 | 5.72E-02 |
| MSMEG_1472 | ribosomal protein S5                           | rpsE | 1.007 | 8.35E-01 |
| MSMEG_1473 | ribosomal protein L30                          | rpmD | 1.193 | 1.87E-03 |
| MSMEG_1474 | ribosomal protein L15                          | rplO | 1.064 | 4.56E-01 |
| MSMEG_1475 | conserved hypothetical protein                 | NA   | 1.201 | 7.57E-02 |
| MSMEG_1476 | signal peptide peptidase SppA, 67K type        | sppA | 0.985 | 8.13E-01 |
| MSMEG_1477 | major facilitator superfamily protein          | NA   | 0.853 | 2.31E-02 |
| MSMEG_1478 | transporter, LysE family protein               | NA   | 0.938 | 1.39E-01 |
| MSMEG_1479 | methyltransferase, putative, family protein    | NA   | 1.020 | 6.70E-01 |
| MSMEG_1480 | methyltransferase                              | NA   | 1.109 | 6.21E-01 |
| MSMEG_1481 | methyltransferase                              | NA   | 1.100 | 5.06E-01 |
| MSMEG_1482 | methyltransferase                              | NA   | 0.998 | 9.81E-01 |
| MSMEG_1483 | preprotein translocase, SecY subunit           | NA   | 0.942 | 6.34E-02 |
| MSMEG_1484 | adenylate kinase                               | NA   | 0.938 | 2.97E-01 |
| MSMEG_1485 | methionine aminopeptidase, type I              | map  | 0.911 | 3.83E-02 |
| MSMEG_1486 | RNA polymerase sigma-70 factor                 | NA   | 0.947 | 5.17E-01 |
| MSMEG_1487 | conserved hypothetical protein                 | NA   | 0.957 | 3.74E-01 |
| MSMEG_1488 | acetolactate synthase                          | NA   | 0.944 | 7.33E-01 |
| MSMEG_1489 | conserved hypothetical protein                 | NA   | 1.444 | 6.05E-01 |
| MSMEG_1490 | 3-oxoacyl-ACP synthase III                     | NA   | 1.094 | 6.03E-01 |
| MSMEG_1491 | histidinol-phosphate aminotransferase 2        | NA   | 1.167 | 2.70E-01 |
| MSMEG_1492 | transcriptional regulator, MarR family protein | NA   | 1.168 | 2.32E-01 |

|            |                                                                                        |      |       |          |
|------------|----------------------------------------------------------------------------------------|------|-------|----------|
| MSMEG_1493 | sensor histidine kinase                                                                | NA   | 1.129 | 3.90E-01 |
| MSMEG_1493 | sensor histidine kinase                                                                | NA   | 1.688 | 9.13E-02 |
| MSMEG_1494 | transcriptional regulatory protein DegU                                                | NA   | 1.235 | 1.38E-01 |
| MSMEG_1495 | HAD-superfamily protein hydrolase subfamily protein IA, variant 3, putative            | NA   | 0.915 | 5.70E-01 |
| MSMEG_1496 | 3-hydroxyisobutyrate dehydrogenase                                                     | mmsB | 1.288 | 4.14E-01 |
| MSMEG_1497 | acyl-CoA dehydrogenase family protein member 8                                         | NA   | 0.836 | 9.99E-02 |
| MSMEG_1498 | methylmalonate-semialdehyde dehydrogenase                                              | mmsA | 0.871 | 4.09E-01 |
| MSMEG_1499 | oxygenase                                                                              | NA   | 1.044 | 7.02E-01 |
| MSMEG_1500 | TetR family protein transcriptional regulatory protein                                 | NA   | 0.899 | 4.08E-01 |
| MSMEG_1501 | methyltransferase, putative, family protein                                            | NA   | 1.068 | 8.40E-01 |
| MSMEG_1502 | ABC transporter, ATP-binding protein                                                   | NA   | 0.978 | 4.79E-01 |
| MSMEG_1503 | probable antibiotic-transport integral membrane leucine and valine rich protein abc tr | NA   | 0.864 | 9.89E-02 |
| MSMEG_1504 | probable antibiotic-transport integral membrane leucine and alanine and valine rich p  | NA   | 1.165 | 4.62E-01 |
| MSMEG_1505 | integral membrane protein                                                              | NA   | 1.516 | 4.52E-01 |
| MSMEG_1506 | transcriptional regulator, TetR family protein                                         | NA   | 1.109 | 4.40E-01 |
| MSMEG_1507 | D-aminopeptidase                                                                       | NA   | 1.010 | 7.93E-01 |
| MSMEG_1508 | amino acid permease-associated region                                                  | NA   | 0.945 | 4.06E-01 |
| MSMEG_1509 | TetR-family protein transcriptional regulator                                          | NA   | 1.286 | 1.63E-01 |
| MSMEG_1510 | dTDP-4-dehydrorhamnose 3,5-epimerase                                                   | NA   | 1.227 | 2.21E-02 |
| MSMEG_1511 | putative oxidoreductase                                                                | NA   | 1.359 | 1.59E-02 |
| MSMEG_1512 | dTDP-glucose 4,6-dehydratase                                                           | rfbB | 1.090 | 2.33E-01 |
| MSMEG_1513 | conserved hypothetical protein                                                         | NA   | 0.853 | 3.00E-02 |
| MSMEG_1514 | conserved hypothetical protein                                                         | NA   | 1.240 | 1.01E-01 |
| MSMEG_1515 | two-component sensor histidine kinase                                                  | NA   | 0.955 | 5.75E-01 |
| MSMEG_1516 | thioredoxin reductase                                                                  | NA   | 1.338 | 7.18E-02 |
| MSMEG_1517 | spfH domain/band 7 family protein, putative                                            | NA   | 0.874 | 8.22E-02 |
| MSMEG_1518 | hypothetical protein                                                                   | NA   | 1.034 | 6.42E-01 |
| MSMEG_1519 | translation initiation factor IF-1                                                     | infA | 1.138 | 6.68E-01 |
| MSMEG_1520 | ribosomal protein L36                                                                  | rpmJ | 1.008 | 9.31E-01 |
| MSMEG_1521 | ribosomal protein S13p/S18e                                                            | rpsM | 0.984 | 8.59E-01 |
| MSMEG_1522 | ribosomal protein S11                                                                  | rpsK | 0.990 | 5.59E-01 |

|            |                                                                                          |      |       |          |
|------------|------------------------------------------------------------------------------------------|------|-------|----------|
| MSMEG_1523 | ribosomal protein S4                                                                     | rpsD | 1.033 | 5.73E-01 |
| MSMEG_1524 | DNA-directed RNA polymerase, alpha subunit                                               | rpoA | 1.052 | 2.98E-01 |
| MSMEG_1525 | 50S ribosomal protein L17                                                                | NA   | 0.871 | 2.07E-02 |
| MSMEG_1526 | probable cutinase                                                                        | NA   | 1.166 | 3.85E-02 |
| MSMEG_1527 | tRNA pseudouridine synthase A                                                            | truA | 1.406 | 3.83E-02 |
| MSMEG_1528 | cutinase                                                                                 | NA   | 1.245 | 1.15E-01 |
| MSMEG_1529 | serine esterase, cutinase family protein                                                 | NA   | 1.549 | 1.71E-03 |
| MSMEG_1530 | integral membrane protein                                                                | NA   | 2.842 | 4.23E-03 |
| MSMEG_1531 | conserved hypothetical protein                                                           | NA   | 1.311 | 4.12E-02 |
| MSMEG_1532 | antibiotic biosynthesis monooxygenase                                                    | NA   | 1.441 | 3.48E-01 |
| MSMEG_1533 | subtilase family protein                                                                 | NA   | 1.140 | 5.15E-01 |
| MSMEG_1534 | probable conserved membrane protein                                                      | NA   | 1.291 | 2.17E-01 |
| MSMEG_1535 | conserved hypothetical protein                                                           | NA   | 1.280 | 1.58E-01 |
| MSMEG_1536 | ftsk/spoiii family protein                                                               | NA   | 0.860 | 8.24E-02 |
| MSMEG_1537 | conserved hypothetical protein                                                           | NA   | 1.234 | 6.10E-01 |
| MSMEG_1538 | conserved hypothetical protein                                                           | NA   | 1.015 | 8.54E-01 |
| MSMEG_1539 | conserved hypothetical protein                                                           | NA   | 0.488 | 2.17E-02 |
| MSMEG_1540 | ATP-dependent RNA helicase                                                               | NA   | 1.683 | 4.24E-02 |
| MSMEG_1541 | hypothetical protein                                                                     | NA   | 1.212 | 4.25E-01 |
| MSMEG_1542 | transcriptional regulator                                                                | NA   | 0.812 | 2.65E-02 |
| MSMEG_1543 | eptc-inducible aldehyde dehydrogenase                                                    | NA   | 0.459 | 4.69E-03 |
| MSMEG_1544 | PduO protein                                                                             | NA   | 0.742 | 2.08E-01 |
| MSMEG_1545 | conserved hypothetical protein                                                           | NA   | 0.894 | 1.53E-01 |
| MSMEG_1546 | coenzyme B12-dependent glycerol dehydrogenase small subunit                              | NA   | 0.506 | 1.31E-03 |
| MSMEG_1547 | glycerol dehydratase large subunit                                                       | NA   | 0.494 | 2.14E-03 |
| MSMEG_1548 | propanediol utilization: dehydratase, medium subunit                                     | NA   | 0.508 | 1.01E-02 |
| MSMEG_1549 | glycerol dehydratase reactivation factor large subunit; this gene contains a frame shift | NA   | 0.597 | 1.57E-02 |
| MSMEG_1550 | PduH protein                                                                             | NA   | 0.661 | 2.13E-01 |
| MSMEG_1551 | hypothetical protein                                                                     | NA   | 1.105 | 5.65E-01 |
| MSMEG_1552 | ethanolamine permease                                                                    | eat  | 0.840 | 6.46E-05 |
| MSMEG_1553 | ethanolamine ammonia-lyase, large subunit                                                | eutB | 0.867 | 2.70E-01 |

|            |                                                                                           |      |       |          |
|------------|-------------------------------------------------------------------------------------------|------|-------|----------|
| MSMEG_1554 | ethanolamine ammonia-lyase, light chain                                                   | eutC | 0.720 | 5.76E-02 |
| MSMEG_1555 | conserved hypothetical protein, authentic frameshift; this gene contains a frame shift    | NA   | 1.235 | 9.14E-02 |
| MSMEG_1556 | ribosomal protein L13                                                                     | rplM | 1.032 | 7.32E-01 |
| MSMEG_1557 | ribosomal protein S9                                                                      | rpsI | 1.025 | 2.04E-01 |
| MSMEG_1558 | conserved hypothetical protein                                                            | NA   | 0.967 | 7.56E-01 |
| MSMEG_1559 | phosphoglucosamine mutase                                                                 | glmM | 1.111 | 1.35E-01 |
| MSMEG_1560 | conserved hypothetical protein                                                            | NA   | 1.791 | 1.45E-02 |
| MSMEG_1561 | LysR-family protein transcriptional regulator                                             | NA   | 1.019 | 7.34E-01 |
| MSMEG_1562 | conserved hypothetical alanine and proline rich protein; this gene contains a frame shift | NA   | 1.042 | 6.53E-01 |
| MSMEG_1562 | conserved hypothetical alanine and proline rich protein; this gene contains a frame shift | NA   | 1.625 | 9.13E-03 |
| MSMEG_1563 | short-chain dehydrogenase/reductase SDR                                                   | NA   | 1.008 | 8.69E-01 |
| MSMEG_1564 | lignostilbene-alpha,beta-dioxygenase                                                      | NA   | 1.164 | 2.97E-01 |
| MSMEG_1565 | transcriptional regulator, TetR family protein                                            | NA   | 0.953 | 2.14E-01 |
| MSMEG_1566 | oxidoreductase                                                                            | NA   | 0.997 | 9.74E-01 |
| MSMEG_1567 | conserved hypothetical protein                                                            | NA   | 1.252 | 1.09E-01 |
| MSMEG_1568 | glucosamine--fructose-6-phosphate aminotransferase, isomerizing                           | glmS | 1.000 | 9.98E-01 |
| MSMEG_1569 | hypothetical protein                                                                      | NA   | 1.042 | 4.53E-01 |
| MSMEG_1570 | carboxylesterase                                                                          | NA   | 1.111 | 6.41E-01 |
| MSMEG_1571 | integral membrane protein                                                                 | NA   | 1.968 | 4.05E-01 |
| MSMEG_1572 | transcriptional regulator, GntR family protein                                            | NA   | 1.947 | 3.25E-01 |
| MSMEG_1573 | carbohydrate kinase family protein                                                        | NA   | 0.881 | 6.11E-02 |
| MSMEG_1574 | glutamate decarboxylase                                                                   | NA   | 0.903 | 2.61E-01 |
| MSMEG_1575 | alanine racemase                                                                          | alr  | 1.237 | 1.55E-01 |
| MSMEG_1576 | alpha/beta hydrolase fold                                                                 | NA   | 1.096 | 3.22E-01 |
| MSMEG_1577 | conserved hypothetical protein                                                            | NA   | 0.962 | 3.78E-01 |
| MSMEG_1578 | peptidase M22, glycoprotease                                                              | NA   | 1.059 | 3.37E-01 |
| MSMEG_1579 | ribosomal-protein-alanine acetyltransferase                                               | rimI | 0.943 | 2.98E-01 |
| MSMEG_1580 | O-sialoglycoprotein endopeptidase                                                         | NA   | 1.036 | 7.62E-01 |
| MSMEG_1581 | conserved hypothetical protein                                                            | NA   | 0.941 | 1.50E-01 |
| MSMEG_1582 | chaperonin GroS                                                                           | groS | 0.677 | 8.91E-04 |
| MSMEG_1583 | chaperonin GroL                                                                           | groL | 0.669 | 1.44E-05 |



|            |                                                                                      |      |       |          |
|------------|--------------------------------------------------------------------------------------|------|-------|----------|
| MSMEG_1584 | hypothetical protein                                                                 | NA   | 1.015 | 8.55E-01 |
| MSMEG_1585 | cupin domain protein                                                                 | NA   | 1.001 | 9.92E-01 |
| MSMEG_1586 | beta-lactamase                                                                       | NA   | 0.944 | 2.22E-01 |
| MSMEG_1587 | alpha/beta hydrolase fold                                                            | NA   | 1.262 | 2.49E-01 |
| MSMEG_1588 | conserved hypothetical protein                                                       | NA   | 1.718 | 3.80E-01 |
| MSMEG_1589 | hypothetical protein                                                                 | NA   | 1.014 | 8.68E-01 |
| MSMEG_1590 | hypothetical protein                                                                 | NA   | 1.168 | 6.49E-01 |
| MSMEG_1591 | TnpC protein                                                                         | NA   | 0.902 | 5.13E-01 |
| MSMEG_1591 | TnpC protein                                                                         | NA   | 1.757 | 2.01E-01 |
| MSMEG_1592 | hypothetical protein                                                                 | NA   | 0.854 | 1.00E-02 |
| MSMEG_1593 | hypothetical protein                                                                 | NA   | 1.121 | 7.02E-01 |
| MSMEG_1594 | enoyl-CoA hydratase                                                                  | NA   | 0.997 | 9.57E-01 |
| MSMEG_1595 | putative oxidoreductase                                                              | NA   | 1.733 | 2.61E-01 |
| MSMEG_1596 | transcriptional regulator                                                            | NA   | 1.263 | 3.08E-02 |
| MSMEG_1597 | Transcription factor WhiB                                                            | NA   | 1.017 | 9.00E-01 |
| MSMEG_1598 | conserved hypothetical protein                                                       | NA   | 0.951 | 3.68E-01 |
| MSMEG_1599 | RNA polymerase sigma-70 factor                                                       | NA   | 1.203 | 1.10E-02 |
| MSMEG_1600 | conserved hypothetical protein                                                       | NA   | 1.215 | 1.68E-02 |
| MSMEG_1601 | conserved hypothetical protein                                                       | NA   | 0.883 | 7.64E-02 |
| MSMEG_1602 | inosine-5'-monophosphate dehydrogenase                                               | guaB | 1.118 | 1.81E-01 |
| MSMEG_1603 | IMP dehydrogenase family protein                                                     | NA   | 1.159 | 2.95E-01 |
| MSMEG_1604 | FAD dependent oxidoreductase                                                         | NA   | 1.135 | 1.51E-02 |
| MSMEG_1605 | phosphate transport system regulatory protein PhoU                                   | phoU | 1.467 | 2.10E-01 |
| MSMEG_1606 | benzoylformate decarboxylase                                                         | NA   | 0.958 | 6.93E-01 |
| MSMEG_1607 | putative tautomerase                                                                 | NA   | 1.109 | 1.57E-01 |
| MSMEG_1608 | glycosyl transferase                                                                 | NA   | 0.982 | 8.92E-01 |
| MSMEG_1609 | beta-phosphoglucomutase hydrolase; this gene contains a frame shift which is not the | NA   | 0.791 | 2.04E-01 |
| MSMEG_1610 | glutamine-hydrolyzing GMP synthase                                                   | NA   | 0.998 | 9.81E-01 |
| MSMEG_1611 | transcriptional regulator, TetR family protein, putative                             | NA   | 1.056 | 4.90E-01 |
| MSMEG_1612 | extracellular solute-binding protein, family protein 3                               | NA   | 1.083 | 4.03E-01 |
| MSMEG_1613 | ABC polar amino acid transporter, inner membrane subunit                             | NA   | 0.787 | 1.91E-02 |

|            |                                                                                          |     |       |          |
|------------|------------------------------------------------------------------------------------------|-----|-------|----------|
| MSMEG_1614 | glutamine transport ATP-binding protein GlnQ                                             | NA  | 1.014 | 8.06E-01 |
| MSMEG_1615 | gamma-glutamyltranspeptidase                                                             | ggt | 0.941 | 6.97E-01 |
| MSMEG_1616 | hypothetical protein; this gene contains a frame shift which is not the result of sequen | NA  | 0.944 | 5.16E-01 |
| MSMEG_1617 | kumamolisin                                                                              | NA  | 1.139 | 1.01E-01 |
| MSMEG_1618 | hypothetical protein                                                                     | NA  | 1.139 | 3.28E-02 |
| MSMEG_1619 | hypothetical protein                                                                     | NA  | 1.226 | 5.44E-01 |
| MSMEG_1620 | conserved hypothetical protein                                                           | NA  | 1.381 | 3.28E-01 |
| MSMEG_1621 | pyrimidine-specific ribonucleoside hydrolase RihA                                        | NA  | 0.951 | 2.67E-01 |
| MSMEG_1622 | putative DNA repair polymerase                                                           | NA  | 1.062 | 7.56E-01 |
| MSMEG_1623 | short chain dehydrogenase                                                                | NA  | 1.031 | 8.44E-01 |
| MSMEG_1624 | universal stress protein family protein                                                  | NA  | 1.512 | 2.84E-01 |
| MSMEG_1625 | amino acid transporter, putative                                                         | NA  | 0.872 | 3.06E-01 |
| MSMEG_1626 | putative DNA-binding protein                                                             | NA  | 1.073 | 3.64E-01 |
| MSMEG_1627 | hypothetical protein                                                                     | NA  | 0.770 | 3.23E-02 |
| MSMEG_1628 | oxidoreductase, short chain dehydrogenase/reductase family protein                       | NA  | 1.054 | 4.38E-01 |
| MSMEG_1629 | hypothetical protein                                                                     | NA  | 0.801 | 6.20E-03 |
| MSMEG_1630 | 2,5-dichloro-2,5-cyclohexadiene-1,4-diol dehydrogenase                                   | NA  | 1.065 | 7.34E-01 |
| MSMEG_1631 | DNA-binding protein                                                                      | NA  | 1.152 | 4.76E-01 |
| MSMEG_1632 | hypothetical protein                                                                     | NA  | 0.838 | 1.83E-02 |
| MSMEG_1633 | DNA polymerase III, alpha subunit, putative                                              | NA  | 1.164 | 9.54E-02 |
| MSMEG_1634 | probable forkhead-associated protein                                                     | NA  | 0.706 | 1.27E-03 |
| MSMEG_1635 | nitroreductase family protein                                                            | NA  | 0.867 | 3.02E-02 |
| MSMEG_1636 | RNA methyltransferase, TrmH family protein, group 2                                      | NA  | 1.066 | 6.20E-01 |
| MSMEG_1637 | periplasmic sensor signal transduction histidine kinase                                  | NA  | 0.919 | 8.32E-02 |
| MSMEG_1638 | Roadblock/LC7 domain protein                                                             | NA  | 1.073 | 7.06E-02 |
| MSMEG_1639 | conserved hypothetical protein                                                           | NA  | 1.020 | 7.65E-01 |
| MSMEG_1640 | ATP/GTP-binding protein                                                                  | NA  | 1.016 | 7.99E-01 |
| MSMEG_1641 | conserved hypothetical protein                                                           | NA  | 1.090 | 1.44E-01 |
| MSMEG_1642 | ABC transporter, ATP-binding protein                                                     | NA  | 1.133 | 1.22E-01 |
| MSMEG_1643 | hypothetical protein                                                                     | NA  | 0.990 | 8.97E-01 |
| MSMEG_1644 | hypothetical protein                                                                     | NA  | 1.144 | 1.30E-01 |

|            |                                                                               |      |       |          |
|------------|-------------------------------------------------------------------------------|------|-------|----------|
| MSMEG_1645 | NADH:flavin oxidoreductase/nadh oxidase                                       | NA   | 1.166 | 1.51E-01 |
| MSMEG_1646 | ribosomal RNA adenine dimethylase family protein                              | NA   | 1.764 | 5.74E-02 |
| MSMEG_1647 | tetrahydrofolate dehydrogenase/cyclohydrolase Fold                            | NA   | 1.062 | 1.79E-01 |
| MSMEG_1648 | putative transcriptional regulator                                            | NA   | 1.158 | 3.28E-01 |
| MSMEG_1649 | FAD dependent oxidoreductase                                                  | NA   | 0.976 | 7.88E-01 |
| MSMEG_1650 | methyltransferase type 11                                                     | NA   | 0.796 | 2.99E-02 |
| MSMEG_1651 | homoserine O-acetyltransferase                                                | metX | 0.827 | 5.44E-02 |
| MSMEG_1652 | O-acetylhomoserine sulfhydrylase                                              | NA   | 0.899 | 1.66E-01 |
| MSMEG_1653 | hypothetical protein                                                          | NA   | 1.273 | 4.79E-01 |
| MSMEG_1654 | isocitrate dehydrogenase, NADP-dependent                                      | NA   | 0.930 | 3.52E-01 |
| MSMEG_1655 | hydrolase, alpha/beta fold family protein, putative                           | NA   | 0.777 | 5.83E-03 |
| MSMEG_1656 | exodeoxyribonuclease III                                                      | xth  | 0.952 | 2.92E-01 |
| MSMEG_1657 | tryptophanyl-tRNA synthetase                                                  | trpS | 0.937 | 1.37E-01 |
| MSMEG_1658 | ribonuclease, putative                                                        | NA   | 1.087 | 9.31E-02 |
| MSMEG_1659 | multidrug resistance protein, SMR family protein                              | NA   | 1.334 | 9.34E-02 |
| MSMEG_1660 | oxidoreductase, 2-nitropropane dioxygenase family protein                     | NA   | 1.151 | 1.33E-02 |
| MSMEG_1661 | D-alanyl-D-alanine carboxypeptidase                                           | NA   | 0.851 | 3.72E-03 |
| MSMEG_1662 | taurine-pyruvate aminotransferase                                             | NA   | 0.796 | 1.50E-02 |
| MSMEG_1663 | transcriptional regulator, AsnC family protein                                | NA   | 0.747 | 4.06E-04 |
| MSMEG_1664 | hypothetical protein                                                          | NA   | 0.808 | 4.67E-02 |
| MSMEG_1665 | aldehyde dehydrogenase (NAD) family protein                                   | NA   | 0.993 | 8.14E-01 |
| MSMEG_1666 | RNA polymerase sigma-70 factor                                                | NA   | 1.034 | 6.79E-01 |
| MSMEG_1667 | IS110 family transposase, truncation; identified by similarity to OMNI:MT3430 | NA   | 1.493 | 1.64E-01 |
| MSMEG_1668 | pyridoxamine 5'-phosphate oxidase family protein                              | NA   | 1.044 | 3.23E-01 |
| MSMEG_1669 | succinate dehydrogenase, iron-sulfur protein                                  | sdhB | 0.931 | 3.14E-01 |
| MSMEG_1670 | succinate dehydrogenase, flavoprotein subunit                                 | sdhA | 0.739 | 7.20E-03 |
| MSMEG_1671 | succinate dehydrogenase hydrophobic membrane anchor protein SdhD              | NA   | 0.929 | 1.27E-02 |
| MSMEG_1672 | succinate dehydrogenase, cytochrome b556 subunit                              | sdhC | 0.788 | 4.62E-02 |
| MSMEG_1673 | cytidine deaminase                                                            | cdd  | 1.064 | 4.33E-01 |
| MSMEG_1674 | hypothetical protein                                                          | NA   | 0.820 | 2.61E-01 |
| MSMEG_1675 | pyrimidine-nucleoside phosphorylase                                           | NA   | 1.035 | 6.15E-01 |

|            |                                                                   |      |       |          |
|------------|-------------------------------------------------------------------|------|-------|----------|
| MSMEG_1676 | adenosine deaminase                                               | add  | 0.925 | 2.59E-01 |
| MSMEG_1677 | aspartate ammonia-lyase                                           | aspA | 0.643 | 8.45E-04 |
| MSMEG_1678 | transcriptional regulator, LysR family protein                    | NA   | 0.917 | 2.25E-01 |
| MSMEG_1679 | AmiB                                                              | NA   | 0.586 | 3.49E-04 |
| MSMEG_1680 | conserved hypothetical protein                                    | NA   | 0.608 | 9.37E-04 |
| MSMEG_1681 | endoribonuclease L-PSP superfamily protein                        | NA   | 0.566 | 6.89E-04 |
| MSMEG_1682 | flavin-containing monooxygenase FMO                               | NA   | 0.694 | 1.08E-02 |
| MSMEG_1683 | cytosine/purine/uracil/thiamine/allantoin permease family protein | NA   | 0.711 | 7.40E-03 |
| MSMEG_1684 | conserved hypothetical protein                                    | NA   | 0.839 | 2.10E-02 |
| MSMEG_1685 | hypothetical protein                                              | NA   | 1.126 | 4.83E-01 |
| MSMEG_1686 | NPL/P60-family protein secreted protein                           | NA   | 0.943 | 6.88E-01 |
| MSMEG_1687 | hypothetical protein                                              | NA   | 1.107 | 5.04E-01 |
| MSMEG_1688 | cupin domain protein                                              | NA   | 1.065 | 6.01E-01 |
| MSMEG_1689 | 3-oxoacyl-[acyl-carrier-protein] reductase                        | NA   | 1.020 | 3.60E-01 |
| MSMEG_1690 | putative ECF sigma factor RpoE1                                   | NA   | 1.276 | 5.65E-01 |
| MSMEG_1691 | transcriptional regulatory protein                                | NA   | 0.919 | 5.13E-01 |
| MSMEG_1692 | ECF-family protein RNA polymerase sigma factor                    | NA   | 1.032 | 7.82E-01 |
| MSMEG_1693 | succinate dehydrogenase [ubiquinone] flavoprotein subunit         | NA   | 0.946 | 7.19E-01 |
| MSMEG_1694 | uracil phosphoribosyltransferase                                  | upp  | 1.005 | 8.99E-01 |
| MSMEG_1695 | phosphoglucomutase/phosphomannomutase                             | NA   | 1.153 | 3.45E-01 |
| MSMEG_1696 | regulatory protein, MarR                                          | NA   | 1.233 | 1.21E-01 |
| MSMEG_1697 | hypothetical protein                                              | NA   | 1.398 | 4.65E-01 |
| MSMEG_1698 | putative ammonia monooxygenase superfamily protein                | NA   | 2.174 | 2.22E-01 |
| MSMEG_1699 | pentachlorophenol 4-monooxygenase                                 | NA   | 0.980 | 9.32E-01 |
| MSMEG_1700 | TetR-family protein transcriptional regulator                     | NA   | 1.184 | 1.71E-01 |
| MSMEG_1701 | purine nucleotide phosphorylase                                   | NA   | 0.997 | 9.74E-01 |
| MSMEG_1702 | amidohydrolase                                                    | NA   | 1.198 | 3.98E-02 |
| MSMEG_1703 | amidohydrolase                                                    | NA   | 1.224 | 2.13E-01 |
| MSMEG_1704 | ABC transporter                                                   | NA   | 0.615 | 2.66E-02 |
| MSMEG_1705 | D-xylose transport ATP-binding protein XylG                       | NA   | 0.679 | 2.53E-02 |
| MSMEG_1706 | xylose transport system permease protein XylH                     | NA   | 0.707 | 1.76E-02 |

|            |                                                                                          |      |       |          |
|------------|------------------------------------------------------------------------------------------|------|-------|----------|
| MSMEG_1707 | phosphatase YfbT                                                                         | NA   | 1.241 | 7.30E-02 |
| MSMEG_1708 | ribose operon repressor, putative                                                        | NA   | 1.028 | 7.59E-01 |
| MSMEG_1709 | inner membrane ABC transporter permease protein YjfF                                     | NA   | 0.939 | 7.50E-01 |
| MSMEG_1710 | ribose transport system permease protein RbsC                                            | NA   | 0.786 | 6.67E-02 |
| MSMEG_1711 | ATP binding protein of ABC transporter                                                   | NA   | 0.539 | 3.03E-02 |
| MSMEG_1712 | ABC transporter periplasmic-binding protein YtfQ                                         | NA   | 0.305 | 8.23E-04 |
| MSMEG_1713 | L-ribulokinase                                                                           | araB | 0.722 | 3.19E-01 |
| MSMEG_1714 | L-ribulose-5-phosphate 4-epimerase UlaF                                                  | NA   | 0.778 | 1.84E-01 |
| MSMEG_1715 | L-arabinose isomerase                                                                    | araA | 0.674 | 1.80E-01 |
| MSMEG_1716 | IS3 family protein element, transposase orfA                                             | NA   | 0.855 | 2.27E-01 |
| MSMEG_1717 | ISMsm8, transposase                                                                      | NA   | 1.074 | 5.68E-01 |
| MSMEG_1718 | This gene is disrupted by an IS element.; IS3 family element, transposase orfB, interrup | NA   | 1.080 | 2.00E-02 |
| MSMEG_1719 | This gene is disrupted by an IS element.; IS3 family element, transposase orfB, interrup | NA   | 1.089 | 1.52E-01 |
| MSMEG_1721 | IS1137, transposase orfB                                                                 | NA   | 1.113 | 5.91E-01 |
| MSMEG_1722 | hypothetical protein                                                                     | NA   | 0.883 | 2.95E-02 |
| MSMEG_1723 | hypothetical protein                                                                     | NA   | 1.172 | 7.73E-02 |
| MSMEG_1724 | conserved hypothetical protein                                                           | NA   | 1.032 | 4.31E-01 |
| MSMEG_1729 | This gene is disrupted by an ISMsm1 element.; ISMsm5, transposase, interruption-N; i     | NA   | 0.936 | 3.09E-01 |
| MSMEG_1731 | IS6120, transposase                                                                      | NA   | 0.959 | 4.51E-01 |
| MSMEG_1731 | IS6120, transposase                                                                      | NA   | 1.052 | 1.25E-01 |
| MSMEG_1731 | IS6120, transposase                                                                      | NA   | 1.225 | 3.11E-02 |
| MSMEG_1732 | Transposase IS116/IS110/IS902 family protein                                             | NA   | 1.052 | 7.74E-01 |
| MSMEG_1733 | conserved hypothetical protein                                                           | NA   | 1.041 | 5.19E-01 |
| MSMEG_1734 | conserved hypothetical protein                                                           | NA   | 1.058 | 9.64E-02 |
| MSMEG_1735 | dihydrolipoamide dehydrogenase                                                           | NA   | 1.104 | 3.44E-01 |
| MSMEG_1736 | glycerol-3-phosphate dehydrogenase 2                                                     | NA   | 1.074 | 7.95E-02 |
| MSMEG_1737 | RNA pseudouridine synthase family protein                                                | NA   | 1.036 | 5.43E-01 |
| MSMEG_1738 | probable conserved transmembrane protein                                                 | NA   | 1.388 | 2.47E-02 |
| MSMEG_1739 | enoyl-CoA hydratase/isomerase family protein                                             | NA   | 0.991 | 9.54E-01 |
| MSMEG_1740 | dehydrogenase/reductase SDR family protein member 4                                      | NA   | 0.788 | 1.91E-02 |
| MSMEG_1741 | TetR-family protein transcriptional regulator                                            | NA   | 1.104 | 3.75E-01 |

|            |                                                                   |      |       |          |
|------------|-------------------------------------------------------------------|------|-------|----------|
| MSMEG_1742 | oxidoreductase                                                    | NA   | 1.192 | 3.05E-01 |
| MSMEG_1743 | Fatty acid desaturase                                             | NA   | 1.437 | 2.12E-03 |
| MSMEG_1744 | hypothetical protein                                              | NA   | 1.052 | 4.01E-01 |
| MSMEG_1745 | transcriptional regulator                                         | NA   | 1.021 | 7.58E-01 |
| MSMEG_1746 | 6-hydroxy-D-nicotine oxidase                                      | NA   | 1.110 | 4.94E-01 |
| MSMEG_1747 | RNA polymerase sigma-70 factor                                    | NA   | 0.850 | 3.82E-01 |
| MSMEG_1749 | putative monooxygenase                                            | NA   | 2.117 | 2.24E-02 |
| MSMEG_1750 | hypothetical protein                                              | NA   | 1.234 | 2.30E-01 |
| MSMEG_1750 | hypothetical protein                                              | NA   | 2.246 | 1.64E-01 |
| MSMEG_1751 | norsolorinic acid reductase                                       | NA   | 1.049 | 5.05E-01 |
| MSMEG_1752 | hypothetical protein                                              | NA   | 1.063 | 4.83E-01 |
| MSMEG_1753 | MTA/SAH nucleosidase                                              | mtnN | 0.883 | 3.18E-01 |
| MSMEG_1754 | conserved hypothetical protein                                    | NA   | 1.109 | 4.82E-01 |
| MSMEG_1755 | anti-sigm factor, ChrR                                            | NA   | 1.472 | 6.95E-02 |
| MSMEG_1756 | endonuclease VIII and dna n-glycosylase with an ap lyase activity | NA   | 1.130 | 5.28E-01 |
| MSMEG_1757 | DEAD/DEAH box helicase                                            | NA   | 0.997 | 9.91E-01 |
| MSMEG_1758 | hypothetical protein                                              | NA   | 1.036 | 8.91E-01 |
| MSMEG_1759 | hypothetical protein                                              | NA   | 0.902 | 6.16E-01 |
| MSMEG_1760 | short-chain dehydrogenase/reductase SDR                           | NA   | 1.124 | 1.49E-01 |
| MSMEG_1761 | integral membrane protein                                         | NA   | 0.919 | 4.58E-01 |
| MSMEG_1762 | piperidine-6-carboxylic acid dehydrogenase                        | NA   | 1.337 | 4.24E-01 |
| MSMEG_1763 | leucine-responsive regulatory protein                             | NA   | 1.177 | 1.67E-01 |
| MSMEG_1764 | L-lysine-epsilon aminotransferase                                 | NA   | 1.318 | 1.74E-01 |
| MSMEG_1765 | restriction endonuclease family protein                           | NA   | 1.274 | 4.22E-01 |
| MSMEG_1766 | conserved hypothetical protein                                    | NA   | 1.173 | 5.70E-01 |
| MSMEG_1767 | conserved hypothetical protein                                    | NA   | 1.140 | 6.60E-01 |
| MSMEG_1768 | conserved hypothetical protein                                    | NA   | 1.400 | 4.68E-01 |
| MSMEG_1769 | UsfY protein                                                      | NA   | 1.038 | 8.39E-01 |
| MSMEG_1770 | conserved hypothetical protein                                    | NA   | 1.443 | 4.91E-01 |
| MSMEG_1771 | methylase, putative                                               | NA   | 1.294 | 4.99E-01 |
| MSMEG_1772 | conserved hypothetical protein                                    | NA   | 1.199 | 4.24E-01 |

|            |                                                                    |    |       |          |
|------------|--------------------------------------------------------------------|----|-------|----------|
| MSMEG_1773 | conserved hypothetical protein                                     | NA | 1.130 | 6.42E-01 |
| MSMEG_1774 | conserved hypothetical protein                                     | NA | 1.543 | 3.40E-01 |
| MSMEG_1775 | cytochrome P450 monooxygenase                                      | NA | 1.736 | 2.89E-01 |
| MSMEG_1776 | ribonuclease Z                                                     | NA | 1.457 | 1.99E-01 |
| MSMEG_1777 | UsfY protein                                                       | NA | 1.132 | 6.85E-01 |
| MSMEG_1778 | conserved hypothetical protein                                     | NA | 1.064 | 1.56E-01 |
| MSMEG_1779 | hypothetical protein                                               | NA | 1.611 | 1.84E-01 |
| MSMEG_1780 | hypothetical protein                                               | NA | 1.037 | 3.90E-01 |
| MSMEG_1781 | hypothetical protein                                               | NA | 1.076 | 7.30E-01 |
| MSMEG_1782 | oxidoreductase, short chain dehydrogenase/reductase family protein | NA | 1.129 | 7.47E-01 |
| MSMEG_1783 | hypothetical protein                                               | NA | 2.040 | 2.96E-01 |
| MSMEG_1784 | type I topoisomerase                                               | NA | 1.139 | 3.54E-01 |
| MSMEG_1785 | hypothetical protein                                               | NA | 1.187 | 2.59E-01 |
| MSMEG_1786 | stas domain, putative                                              | NA | 0.715 | 5.41E-02 |
| MSMEG_1787 | RsbW protein                                                       | NA | 1.215 | 6.51E-01 |
| MSMEG_1788 | conserved hypothetical protein                                     | NA | 1.118 | 6.85E-01 |
| MSMEG_1789 | conserved hypothetical protein                                     | NA | 1.086 | 6.69E-01 |
| MSMEG_1790 | conserved hypothetical protein                                     | NA | 1.108 | 7.53E-01 |
| MSMEG_1791 | UsfY protein                                                       | NA | 1.162 | 2.71E-01 |
| MSMEG_1792 | conserved hypothetical protein                                     | NA | 1.046 | 9.00E-01 |
| MSMEG_1793 | membrane protein                                                   | NA | 0.905 | 4.36E-02 |
| MSMEG_1794 | dehydrogenase                                                      | NA | 1.577 | 3.34E-01 |
| MSMEG_1795 | 2-deoxy-scyllo-inosamine dehydrogenase                             | NA | 0.899 | 5.04E-01 |
| MSMEG_1796 | membrane protein                                                   | NA | 1.087 | 7.53E-01 |
| MSMEG_1797 | salicylate esterase                                                | NA | 3.847 | 3.65E-01 |
| MSMEG_1798 | major facilitator superfamily protein                              | NA | 0.991 | 9.70E-01 |
| MSMEG_1799 | transcriptional regulator                                          | NA | 0.890 | 1.51E-01 |
| MSMEG_1800 | hypothetical protein                                               | NA | 1.097 | 4.24E-01 |
| MSMEG_1801 | hypothetical protein                                               | NA | 1.354 | 5.78E-01 |
| MSMEG_1802 | ChaB protein                                                       | NA | 1.164 | 5.73E-01 |
| MSMEG_1803 | RsbW protein                                                       | NA | 0.870 | 1.62E-02 |

|            |                                                                                           |      |       |          |
|------------|-------------------------------------------------------------------------------------------|------|-------|----------|
| MSMEG_1804 | RNA polymerase sigma-F factor                                                             | NA   | 0.922 | 5.34E-02 |
| MSMEG_1805 | conserved hypothetical protein                                                            | NA   | 1.252 | 2.20E-01 |
| MSMEG_1806 | conserved hypothetical protein                                                            | NA   | 1.084 | 4.41E-01 |
| MSMEG_1807 | acetyl-/propionyl-coenzyme A carboxylase alpha chain                                      | NA   | 0.915 | 1.53E-01 |
| MSMEG_1808 | Fe-S metabolism associated SufE                                                           | NA   | 0.922 | 1.41E-01 |
| MSMEG_1809 | putative thiosulfate sulfurtransferase                                                    | NA   | 0.907 | 6.09E-02 |
| MSMEG_1810 | hypothetical protein                                                                      | NA   | 1.547 | 5.40E-02 |
| MSMEG_1811 | septum formation protein Maf                                                              | maf  | 1.154 | 2.83E-01 |
| MSMEG_1812 | conserved hypothetical protein                                                            | NA   | 1.076 | 5.13E-01 |
| MSMEG_1813 | propionyl-CoA carboxylase beta chain                                                      | NA   | 0.909 | 3.25E-01 |
| MSMEG_1814 | hypothetical protein                                                                      | NA   | 1.062 | 7.19E-01 |
| MSMEG_1815 | hypothetical protein                                                                      | NA   | 1.042 | 5.61E-01 |
| MSMEG_1816 | hypothetical protein; this region contains one or more premature stops and/or frames      | NA   | 0.912 | 4.90E-01 |
| MSMEG_1816 | hypothetical protein; this region contains one or more premature stops and/or frames      | NA   | 2.671 | 2.81E-01 |
| MSMEG_1817 | probable conserved transmembrane protein                                                  | NA   | 1.282 | 1.12E-01 |
| MSMEG_1818 | Bacterial membrane flanked domain protein                                                 | NA   | 1.066 | 6.20E-01 |
| MSMEG_1819 | phosphoribosylaminoimidazole carboxylase, ATPase subunit                                  | purK | 1.017 | 5.92E-01 |
| MSMEG_1820 | phosphoribosylaminoimidazole carboxylase, catalytic subunit                               | purE | 1.081 | 1.29E-01 |
| MSMEG_1821 | acyl-CoA dehydrogenase                                                                    | NA   | 1.001 | 9.78E-01 |
| MSMEG_1822 | biotin-[acetyl-CoA-carboxylase] ligase                                                    | NA   | 1.337 | 8.34E-02 |
| MSMEG_1823 | conserved hypothetical protein                                                            | NA   | 1.025 | 5.66E-01 |
| MSMEG_1824 | transcriptional regulator, LytR family protein                                            | NA   | 0.891 | 2.20E-01 |
| MSMEG_1825 | dTDP-4-dehydrorhamnose reductase                                                          | rfbD | 1.151 | 1.21E-01 |
| MSMEG_1826 | dTDP-RhA:a-D-GlcNAc-diphosphoryl polyprenol, a-3-L-rhamnosyl transferase                  | NA   | 1.332 | 1.75E-02 |
| MSMEG_1827 | hydrolase, nudix family protein, putative                                                 | NA   | 0.974 | 8.93E-01 |
| MSMEG_1828 | Nucleotidyl transferase; this gene contains a frame shift which is not the result of sequ | NA   | 1.222 | 2.89E-02 |
| MSMEG_1829 | F420-0:gamma-glutamyl ligase                                                              | NA   | 0.987 | 8.65E-01 |
| MSMEG_1830 | lppg:fo 2-phospho-l-lactate transferase                                                   | cofD | 0.947 | 4.40E-01 |
| MSMEG_1831 | Transcription factor WhiB                                                                 | NA   | 0.996 | 9.69E-01 |
| MSMEG_1832 | conserved hypothetical protein                                                            | NA   | 1.163 | 5.19E-01 |
| MSMEG_1833 | conserved hypothetical protein                                                            | NA   | 0.977 | 8.45E-01 |



|            |                                                                                                                  |      |       |          |
|------------|------------------------------------------------------------------------------------------------------------------|------|-------|----------|
| MSMEG_1834 | phosphomannomutase/phosphoglucomutase                                                                            | NA   | 1.061 | 3.96E-02 |
| MSMEG_1835 | TobH protein                                                                                                     | NA   | 1.024 | 5.35E-01 |
| MSMEG_1836 | mannose-6-phosphate isomerase, class I                                                                           | manA | 0.986 | 5.58E-01 |
| MSMEG_1837 | secreted protein                                                                                                 | NA   | 0.906 | 1.52E-01 |
| MSMEG_1838 | cationic amino acid transporter                                                                                  | NA   | 0.930 | 2.57E-01 |
| MSMEG_1839 | alkane 1-monooxygenase                                                                                           | NA   | 0.749 | 6.17E-02 |
| MSMEG_1840 | rubredoxin                                                                                                       | NA   | 0.920 | 3.47E-01 |
| MSMEG_1841 | rubredoxin                                                                                                       | NA   | 1.406 | 2.84E-01 |
| MSMEG_1842 | transcriptional regulator, TetR family protein                                                                   | NA   | 0.966 | 5.54E-01 |
| MSMEG_1843 | adenosylhomocysteinase; this gene contains a frame shift which is not the result of se                           | ahcY | 0.908 | 2.62E-01 |
| MSMEG_1843 | adenosylhomocysteinase; this gene contains a frame shift which is not the result of se                           | ahcY | 0.988 | 8.10E-01 |
| MSMEG_1844 | conserved hypothetical protein                                                                                   | NA   | 1.013 | 9.09E-01 |
| MSMEG_1845 | YghA protein                                                                                                     | NA   | 1.264 | 4.03E-01 |
| MSMEG_1846 | polysulphide reductase, NrfD                                                                                     | NA   | 1.252 | 3.24E-01 |
| MSMEG_1847 | 4Fe-4S ferredoxin, iron-sulfur binding protein                                                                   | NA   | 1.004 | 9.53E-01 |
| MSMEG_1848 | formate dehydrogenase-O, major subunit; this gene contains a frame shift which is no                             | NA   | 0.870 | 3.27E-01 |
| MSMEG_1848 | formate dehydrogenase-O, major subunit; this gene contains a frame shift which is no                             | NA   | 1.415 | 1.64E-01 |
| MSMEG_1849 | selenocysteine-specific translation elongation factor                                                            | selB | 1.042 | 8.87E-01 |
| MSMEG_1850 | L-seryl-tRNA selenium transferase                                                                                | selA | 0.996 | 9.68E-01 |
| MSMEG_1852 | selenide, water dikinase                                                                                         | selD | 1.040 | 7.95E-01 |
| MSMEG_1853 | Na <sup>+</sup> /H <sup>+</sup> antiporter NhaA; this gene contains a frame shift which is not the result of seq | NA   | 0.944 | 5.60E-01 |
| MSMEG_1853 | Na <sup>+</sup> /H <sup>+</sup> antiporter NhaA; this gene contains a frame shift which is not the result of seq | NA   | 1.157 | 2.64E-01 |
| MSMEG_1854 | valosin containing protein-1                                                                                     | NA   | 0.974 | 5.86E-01 |
| MSMEG_1855 | tetratricopeptide repeat protein, putative                                                                       | NA   | 1.197 | 2.02E-01 |
| MSMEG_1856 | hypothetical protein                                                                                             | NA   | 1.203 | 1.23E-01 |
| MSMEG_1859 | hypothetical protein                                                                                             | NA   | 2.142 | 4.52E-01 |
| MSMEG_1860 | hypothetical protein                                                                                             | NA   | 0.911 | 5.38E-01 |
| MSMEG_1861 | hypothetical protein                                                                                             | NA   | 0.829 | 7.28E-02 |
| MSMEG_1862 | transposase                                                                                                      | NA   | 0.767 | 1.03E-03 |
| MSMEG_1862 | transposase                                                                                                      | NA   | 0.829 | 5.94E-04 |
| MSMEG_1863 | putative transposase                                                                                             | NA   | 0.844 | 5.39E-02 |

|            |                                                       |      |       |          |
|------------|-------------------------------------------------------|------|-------|----------|
| MSMEG_1863 | putative transposase                                  | NA   | 0.880 | 1.03E-01 |
| MSMEG_1864 | transposase                                           | NA   | 0.759 | 6.02E-02 |
| MSMEG_1866 | transposase B                                         | NA   | 0.767 | 2.93E-02 |
| MSMEG_1867 | transposase                                           | NA   | 0.835 | 6.73E-02 |
| MSMEG_1868 | hypothetical protein                                  | NA   | 0.718 | 4.35E-03 |
| MSMEG_1869 | hypothetical protein                                  | NA   | 0.716 | 1.14E-02 |
| MSMEG_1870 | conserved hypothetical protein                        | NA   | 1.839 | 5.02E-01 |
| MSMEG_1871 | conserved hypothetical protein                        | NA   | 1.019 | 6.59E-01 |
| MSMEG_1872 | conserved hypothetical protein                        | NA   | 1.017 | 8.37E-01 |
| MSMEG_1873 | thymidylate kinase                                    | NA   | 0.877 | 2.17E-02 |
| MSMEG_1874 | DNA-binding response regulator MtrA                   | mtrA | 0.873 | 1.97E-02 |
| MSMEG_1875 | sensor histidine kinase MtrB                          | NA   | 1.622 | 5.52E-01 |
| MSMEG_1876 | LpqB protein                                          | NA   | 1.000 | 9.99E-01 |
| MSMEG_1877 | conserved hypothetical protein                        | NA   | 0.959 | 7.27E-01 |
| MSMEG_1878 | S30AE family protein                                  | NA   | 0.675 | 1.63E-03 |
| MSMEG_1879 | hypothetical protein                                  | NA   | 1.129 | 4.15E-01 |
| MSMEG_1880 | hypothetical alanine arginine proline rich protein    | NA   | 1.097 | 4.47E-01 |
| MSMEG_1881 | preprotein translocase, SecA subunit                  | secA | 1.049 | 7.21E-01 |
| MSMEG_1882 | acyltransferase, ws/dgat/mgat subfamily protein       | NA   | 1.089 | 3.32E-01 |
| MSMEG_1883 | glycine betaine transporter OpuD                      | NA   | 1.162 | 9.98E-02 |
| MSMEG_1884 | conserved hypothetical protein                        | NA   | 1.139 | 6.62E-02 |
| MSMEG_1885 | 2Fe-2S iron-sulfur cluster binding domain protein     | NA   | 1.113 | 3.00E-01 |
| MSMEG_1886 | Fatty acid desaturase                                 | NA   | 1.160 | 3.55E-01 |
| MSMEG_1887 | hypothetical protein                                  | NA   | 1.359 | 1.02E-01 |
| MSMEG_1888 | methyltransferase                                     | NA   | 0.949 | 3.16E-01 |
| MSMEG_1889 | putative ribosome small subunit-dependent GTPase RsgA | NA   | 1.026 | 7.42E-01 |
| MSMEG_1890 | 3-phosphoshikimate 1-carboxyvinyltransferase          | aroA | 1.149 | 1.86E-01 |
| MSMEG_1891 | conserved hypothetical protein                        | NA   | 1.062 | 4.18E-01 |
| MSMEG_1892 | transferase                                           | NA   | 1.069 | 2.69E-02 |
| MSMEG_1893 | UbiE/COQ5 methyltransferase                           | NA   | 0.874 | 6.13E-02 |
| MSMEG_1894 | short chain dehydrogenase                             | NA   | 0.938 | 2.60E-01 |

|            |                                                             |      |       |          |
|------------|-------------------------------------------------------------|------|-------|----------|
| MSMEG_1895 | HTH-type transcriptional regulator AlsR                     | NA   | 1.775 | 1.99E-01 |
| MSMEG_1896 | beta-ketothiolase                                           | NA   | 0.905 | 1.00E-01 |
| MSMEG_1897 | 3-oxoadipate enol-lactonase                                 | pcaD | 0.966 | 8.29E-01 |
| MSMEG_1898 | succinyl-CoA:3-ketoacid-coenzyme A transferase 1, precursor | NA   | 1.027 | 8.27E-01 |
| MSMEG_1899 | succinyl-CoA:3-ketoacid-coenzyme A transferase subunit B    | NA   | 1.038 | 7.54E-01 |
| MSMEG_1900 | D-alanyl-D-alanine carboxypeptidase family protein          | NA   | 1.004 | 9.32E-01 |
| MSMEG_1900 | D-alanyl-D-alanine carboxypeptidase family protein          | NA   | 1.135 | 7.99E-02 |
| MSMEG_1901 | DNA-binding HTH domain containing protein, putative         | NA   | 1.191 | 4.15E-01 |
| MSMEG_1902 | transcriptional regulator                                   | NA   | 1.189 | 1.79E-01 |
| MSMEG_1903 | caib/baif family protein                                    | NA   | 1.337 | 1.04E-01 |
| MSMEG_1904 | acyl-CoA dehydrogenase                                      | NA   | 1.161 | 1.28E-01 |
| MSMEG_1905 | acyl-CoA dehydrogenase protein                              | NA   | 1.200 | 1.33E-01 |
| MSMEG_1906 | toluate 1,2-dioxygenase electron transfer component         | NA   | 1.216 | 5.95E-01 |
| MSMEG_1907 | toluate 1,2-dioxygenase beta subunit                        | NA   | 1.133 | 3.36E-01 |
| MSMEG_1908 | benzoate 1,2-dioxygenase alpha subunit                      | NA   | 1.061 | 7.19E-01 |
| MSMEG_1909 | putative HTH-type transcriptional regulator YnfL            | NA   | 0.844 | 5.04E-01 |
| MSMEG_1910 | muconate cycloisomerase                                     | NA   | 0.944 | 7.32E-01 |
| MSMEG_1911 | catechol 1,2-dioxygenase                                    | catA | 0.698 | 3.93E-02 |
| MSMEG_1912 | muconolactone delta-isomerase 1                             | NA   | 0.849 | 8.55E-02 |
| MSMEG_1913 | YbaK/ebsC protein                                           | ybaK | 1.190 | 1.05E-01 |
| MSMEG_1914 | RNA polymerase sigma-70 factor, family protein              | NA   | 0.965 | 8.11E-01 |
| MSMEG_1915 | anti-sigma factor, family protein                           | NA   | 1.062 | 5.20E-01 |
| MSMEG_1916 | hypothetical protein                                        | NA   | 1.294 | 1.24E-01 |
| MSMEG_1917 | conserved domain protein                                    | NA   | 0.954 | 3.60E-01 |
| MSMEG_1918 | sensor histidine kinase                                     | NA   | 1.082 | 2.37E-01 |
| MSMEG_1919 | Transcription factor WhiB                                   | NA   | 1.540 | 2.90E-01 |
| MSMEG_1920 | diacylglycerol kinase, catalytic region                     | NA   | 1.246 | 3.23E-02 |
| MSMEG_1921 | SEC-C motif domain protein                                  | NA   | 1.246 | 2.39E-02 |
| MSMEG_1922 | 3-dehydroquininate dehydratase, type II                     | aroQ | 1.108 | 3.75E-02 |
| MSMEG_1923 | membrane protein                                            | NA   | 1.312 | 1.42E-01 |
| MSMEG_1924 | N-acetyltransferase Ats1                                    | NA   | 0.940 | 7.05E-01 |

|            |                                                                               |    |       |          |
|------------|-------------------------------------------------------------------------------|----|-------|----------|
| MSMEG_1925 | isochorismate synthase Dhbc                                                   | NA | 1.000 | 9.99E-01 |
| MSMEG_1926 | phosphoglycerate mutase family protein                                        | NA | 1.114 | 2.75E-01 |
| MSMEG_1927 | cobyrinic Acid a,c-diamide synthase                                           | NA | 0.909 | 1.62E-01 |
| MSMEG_1928 | regulatory protein                                                            | NA | 1.235 | 4.33E-01 |
| MSMEG_1929 | conserved hypothetical protein                                                | NA | 1.017 | 9.05E-01 |
| MSMEG_1930 | DEAD/DEAH box helicase                                                        | NA | 0.831 | 2.36E-02 |
| MSMEG_1931 | conserved hypothetical protein                                                | NA | 0.931 | 2.05E-02 |
| MSMEG_1932 | MmpS3 protein                                                                 | NA | 0.745 | 3.95E-03 |
| MSMEG_1933 | hypothetical protein                                                          | NA | 1.004 | 9.36E-01 |
| MSMEG_1934 | ATP-binding protein                                                           | NA | 1.046 | 8.24E-01 |
| MSMEG_1935 | TetR-family protein transcriptional regulator                                 | NA | 0.953 | 5.64E-01 |
| MSMEG_1936 | conserved hypothetical protein                                                | NA | 0.981 | 4.86E-01 |
| MSMEG_1937 | molybdopterin biosynthesis protein MoeB                                       | NA | 0.999 | 9.79E-01 |
| MSMEG_1938 | conserved hypothetical protein                                                | NA | 1.016 | 6.68E-01 |
| MSMEG_1939 | 6-O-methylguanine DNA methyltransferase, DNA binding domain subfamily protein | NA | 1.275 | 1.59E-02 |
| MSMEG_1940 | hydrolase, alpha/beta fold family protein                                     | NA | 1.283 | 4.55E-01 |
| MSMEG_1941 | helicase, UvrD/Rep family protein                                             | NA | 1.059 | 5.25E-01 |
| MSMEG_1942 | integral membrane protein                                                     | NA | 0.999 | 9.75E-01 |
| MSMEG_1943 | ATP-dependent DNA helicase                                                    | NA | 0.831 | 2.50E-02 |
| MSMEG_1944 | membrane protein                                                              | NA | 0.970 | 2.14E-01 |
| MSMEG_1945 | ion channel membrane protein                                                  | NA | 0.928 | 8.62E-02 |
| MSMEG_1946 | NADH pyrophosphatase                                                          | NA | 1.110 | 1.91E-01 |
| MSMEG_1947 | conserved hypothetical protein                                                | NA | 1.257 | 2.03E-01 |
| MSMEG_1948 | hypothetical protein                                                          | NA | 1.421 | 4.72E-01 |
| MSMEG_1949 | hypothetical protein                                                          | NA | 1.747 | 2.33E-01 |
| MSMEG_1950 | conserved hypothetical protein                                                | NA | 1.358 | 4.11E-01 |
| MSMEG_1951 | conserved domain protein                                                      | NA | 1.221 | 4.44E-01 |
| MSMEG_1952 | ATP-dependent DNA helicase                                                    | NA | 1.257 | 8.63E-02 |
| MSMEG_1953 | transcription factor WhiB                                                     | NA | 1.611 | 2.23E-02 |
| MSMEG_1954 | ABC1 family protein                                                           | NA | 1.009 | 8.85E-01 |
| MSMEG_1955 | conserved hypothetical protein                                                | NA | 0.947 | 1.26E-01 |

|            |                                                                                     |      |       |          |
|------------|-------------------------------------------------------------------------------------|------|-------|----------|
| MSMEG_1956 | hypothetical protein                                                                | NA   | 1.214 | 2.97E-01 |
| MSMEG_1957 | conserved hypothetical protein                                                      | NA   | 0.919 | 1.51E-01 |
| MSMEG_1958 | PDZ domain family protein                                                           | NA   | 0.848 | 2.01E-02 |
| MSMEG_1959 | putative membrane protein                                                           | NA   | 0.871 | 1.67E-02 |
| MSMEG_1960 | hypothetical protein                                                                | NA   | 1.135 | 4.93E-02 |
| MSMEG_1961 | conserved hypothetical protein                                                      | NA   | 0.971 | 6.33E-01 |
| MSMEG_1962 | hypothetical protein                                                                | NA   | 0.973 | 6.50E-01 |
| MSMEG_1963 | putative transcriptional regulatory protein                                         | NA   | 1.245 | 4.00E-01 |
| MSMEG_1964 | mitomycin radical oxidase                                                           | NA   | 1.165 | 5.61E-01 |
| MSMEG_1966 | hypothetical protein                                                                | NA   | 1.172 | 5.41E-01 |
| MSMEG_1967 | TetR-family protein transcriptional regulator                                       | NA   | 1.204 | 3.14E-02 |
| MSMEG_1968 | putative oxidoreductase                                                             | NA   | 1.115 | 1.49E-01 |
| MSMEG_1969 | MerR-family protein transcriptional regulator                                       | NA   | 1.455 | 9.44E-02 |
| MSMEG_1970 | sigma factor                                                                        | NA   | 1.198 | 5.14E-01 |
| MSMEG_1971 | propane monooxygenase hydroxylase large subunit                                     | NA   | 1.040 | 7.90E-01 |
| MSMEG_1972 | methane monooxygenase component C                                                   | NA   | 0.974 | 9.10E-01 |
| MSMEG_1973 | propane monooxygenase hydroxylase small subunit; this gene contains a frame shift w | NA   | 0.807 | 3.73E-01 |
| MSMEG_1973 | propane monooxygenase hydroxylase small subunit; this gene contains a frame shift w | NA   | 1.125 | 3.07E-01 |
| MSMEG_1974 | propane monooxygenase coupling protein                                              | NA   | 1.285 | 2.25E-01 |
| MSMEG_1975 | amidohydrolase 2                                                                    | NA   | 0.892 | 1.23E-01 |
| MSMEG_1976 | conserved hypothetical protein                                                      | NA   | 1.167 | 3.76E-01 |
| MSMEG_1977 | alcohol dehydrogenase                                                               | NA   | 0.960 | 7.50E-01 |
| MSMEG_1978 | chaperonin GroL                                                                     | groL | 0.897 | 2.50E-01 |
| MSMEG_1979 | antibiotic biosynthesis monooxygenase                                               | NA   | 0.933 | 7.58E-02 |
| MSMEG_1980 | monooxygenase                                                                       | NA   | 1.161 | 6.75E-02 |
| MSMEG_1981 | conserved hypothetical protein                                                      | NA   | 0.991 | 8.78E-01 |
| MSMEG_1982 | acyl-CoA synthase                                                                   | NA   | 0.875 | 6.39E-02 |
| MSMEG_1983 | major facilitator family protein transporter                                        | NA   | 1.005 | 8.75E-01 |
| MSMEG_1984 | haloacetate dehalogenase H-1                                                        | NA   | 0.990 | 8.41E-01 |
| MSMEG_1985 | transcriptional regulator, LysR family protein                                      | NA   | 1.114 | 4.75E-01 |
| MSMEG_1986 | tartrate dehydrogenase                                                              | NA   | 0.940 | 7.37E-01 |

|            |                                                                                        |      |       |          |
|------------|----------------------------------------------------------------------------------------|------|-------|----------|
| MSMEG_1987 | conserved hypothetical protein                                                         | NA   | 1.487 | 2.82E-01 |
| MSMEG_1988 | conserved hypothetical protein                                                         | NA   | 0.953 | 8.03E-01 |
| MSMEG_1989 | phenoxybenzoate dioxygenase beta subunit                                               | NA   | 1.307 | 1.59E-01 |
| MSMEG_1990 | conserved hypothetical protein                                                         | NA   | 1.033 | 2.78E-01 |
| MSMEG_1991 | isovaleryl-CoA dehydrogenase                                                           | NA   | 1.014 | 8.95E-01 |
| MSMEG_1992 | L-carnitine dehydratase/bile acid-inducible protein F                                  | NA   | 1.185 | 4.18E-01 |
| MSMEG_1993 | MaoC like domain protein                                                               | NA   | 0.891 | 3.98E-01 |
| MSMEG_1994 | HpcH/Hpal aldolase                                                                     | NA   | 1.147 | 4.51E-01 |
| MSMEG_1995 | transcriptional regulator MdcY family protein                                          | NA   | 1.206 | 1.02E-01 |
| MSMEG_1996 | N5,N10- methylenetetrahydromethanopterin reductase-related protein                     | NA   | 1.253 | 6.06E-03 |
| MSMEG_1997 | N-acyl-D-glutamate amidohydrolase                                                      | NA   | 0.982 | 5.68E-01 |
| MSMEG_1998 | hydrolase, alpha/beta fold family protein                                              | NA   | 1.013 | 9.03E-01 |
| MSMEG_1999 | hypothetical protein                                                                   | NA   | 1.254 | 5.42E-01 |
| MSMEG_2000 | conserved hypothetical protein                                                         | NA   | 1.214 | 7.12E-02 |
| MSMEG_2001 | sugar transporter                                                                      | NA   | 1.213 | 7.06E-01 |
| MSMEG_2004 | arabinose-proton symporter                                                             | NA   | 1.618 | 5.74E-02 |
| MSMEG_2005 | sugar phosphate isomerase/epimerase                                                    | NA   | 1.266 | 1.61E-01 |
| MSMEG_2006 | 2,3-dihydroxybiphenyl 1,2-dioxygenase                                                  | NA   | 1.470 | 6.05E-02 |
| MSMEG_2007 | putative HpcE protein                                                                  | NA   | 1.549 | 3.63E-03 |
| MSMEG_2008 | hypothetical protein                                                                   | NA   | 0.928 | 4.52E-01 |
| MSMEG_2009 | regulatory protein GntR, HTH:GntR, C-                                                  | NA   | 1.333 | 5.94E-03 |
| MSMEG_2010 | stress responsive A/B Barrel Domain superfamily protein                                | NA   | 1.082 | 1.33E-01 |
| MSMEG_2011 | transcriptional regulator, LacI family protein                                         | NA   | 1.426 | 3.70E-01 |
| MSMEG_2012 | histidinol dehydrogenase                                                               | hisD | 1.296 | 3.97E-01 |
| MSMEG_2013 | oxidoreductase, short chain dehydrogenase/reductase family protein                     | NA   | 1.389 | 4.04E-01 |
| MSMEG_2014 | molybdenum import ATP-binding protein ModC                                             | NA   | 1.224 | 2.25E-01 |
| MSMEG_2015 | molybdate ABC transporter, permease protein                                            | modB | 1.088 | 4.08E-01 |
| MSMEG_2016 | molybdate ABC transporter, periplasmic molybdate-binding protein                       | modA | 1.197 | 1.58E-01 |
| MSMEG_2017 | transcriptional regulator, MerR family protein                                         | NA   | 1.121 | 1.29E-01 |
| MSMEG_2018 | cytochrome P450 107B1; this gene contains a frame shift which is not the result of seq | NA   | 1.392 | 2.48E-01 |
| MSMEG_2019 | short-chain dehydrogenase/reductase SDR                                                | NA   | 1.138 | 1.50E-01 |

|            |                                                                                            |      |       |          |
|------------|--------------------------------------------------------------------------------------------|------|-------|----------|
| MSMEG_2020 | hyi family protein, authentic frameshift; this gene contains a frame shift which is not tl | NA   | 1.137 | 3.59E-01 |
| MSMEG_2021 | lipopolysaccharide biosynthesis acyltransferase, M                                         | NA   | 1.113 | 1.68E-01 |
| MSMEG_2022 | GntT protein, putative                                                                     | NA   | 1.069 | 7.95E-01 |
| MSMEG_2023 | CAIB/BAIF family protein                                                                   | NA   | 0.968 | 8.95E-01 |
| MSMEG_2024 | hydroxymethylglutaryl-CoA lyase                                                            | NA   | 1.418 | 5.09E-01 |
| MSMEG_2025 | putative lclR family protein transcriptional regulator                                     | NA   | 0.979 | 3.36E-01 |
| MSMEG_2026 | short chain dehydrogenase                                                                  | NA   | 1.164 | 1.01E-01 |
| MSMEG_2027 | conserved hypothetical protein TIGR00026                                                   | NA   | 1.866 | 4.95E-02 |
| MSMEG_2028 | chloramphenicol resistance protein                                                         | NA   | 1.057 | 3.13E-01 |
| MSMEG_2029 | 3-ketoacyl-ACP/CoA reductase                                                               | NA   | 1.015 | 8.81E-01 |
| MSMEG_2030 | transcriptional regulator, TetR family protein                                             | NA   | 1.094 | 3.51E-01 |
| MSMEG_2031 | hypothetical protein                                                                       | NA   | 1.347 | 1.05E-01 |
| MSMEG_2032 | conserved hypothetical protein                                                             | NA   | 0.911 | 3.12E-01 |
| MSMEG_2033 | oxidoreductase, zinc-binding dehydrogenase family protein                                  | NA   | 0.871 | 7.61E-02 |
| MSMEG_2034 | aryl-alcohol dehydrogenase                                                                 | NA   | 1.459 | 4.97E-01 |
| MSMEG_2035 | amine oxidase [flavin-containing] B                                                        | NA   | 1.131 | 1.82E-01 |
| MSMEG_2036 | hydrolase, alpha/beta fold family protein                                                  | NA   | 2.626 | 2.28E-01 |
| MSMEG_2037 | conserved hypothetical protein                                                             | NA   | 0.892 | 3.37E-01 |
| MSMEG_2038 | monooxygenase, flavin-binding family protein                                               | NA   | 0.882 | 1.84E-02 |
| MSMEG_2039 | putative transcriptional regulator                                                         | NA   | 1.033 | 6.49E-01 |
| MSMEG_2040 | hypothetical protein                                                                       | NA   | 2.939 | 2.75E-01 |
| MSMEG_2041 | conserved hypothetical protein; this gene contains a frame shift which is not the result   | NA   | 0.734 | 3.18E-02 |
| MSMEG_2042 | phosphotransferase enzyme family protein                                                   | NA   | 0.889 | 1.79E-01 |
| MSMEG_2043 | transcriptional regulator, TetR family protein                                             | NA   | 1.282 | 3.60E-01 |
| MSMEG_2044 | integral membrane transport protein                                                        | NA   | 0.856 | 9.15E-02 |
| MSMEG_2045 | monooxygenase                                                                              | NA   | 1.001 | 9.92E-01 |
| MSMEG_2046 | GlcNAc-PI de-N-acetylase family protein                                                    | NA   | 0.857 | 4.27E-02 |
| MSMEG_2047 | probable enoyl-CoA hydratase                                                               | NA   | 0.984 | 7.81E-01 |
| MSMEG_2048 | alcohol dehydrogenase                                                                      | NA   | 1.119 | 3.38E-01 |
| MSMEG_2049 | putative transcriptional regulator, TetR family protein                                    | NA   | 0.959 | 8.51E-01 |
| MSMEG_2050 | NADH-quinone oxidoreductase, N subunit                                                     | nuoN | 1.108 | 4.61E-01 |

|            |                                                |      |       |          |
|------------|------------------------------------------------|------|-------|----------|
| MSMEG_2051 | NADH-quinone oxidoreductase, M subunit         | nuoM | 1.108 | 1.50E-01 |
| MSMEG_2052 | NADH-quinone oxidoreductase, L subunit         | nuoL | 0.844 | 4.54E-01 |
| MSMEG_2053 | NADH-quinone oxidoreductase, k subunit         | nuoK | 1.101 | 6.51E-01 |
| MSMEG_2054 | NADH dehydrogenase subunit j                   | NA   | 0.974 | 7.16E-01 |
| MSMEG_2055 | NADH-quinone oxidoreductase, I subunit         | nuoI | 1.018 | 8.12E-01 |
| MSMEG_2056 | NADH-quinone oxidoreductase, H subunit         | nuoH | 1.718 | 5.05E-01 |
| MSMEG_2057 | NADH-quinone oxidoreductase, G subunit         | nuoG | 0.946 | 5.43E-01 |
| MSMEG_2058 | NADH-quinone oxidoreductase, F subunit         | nuoF | 0.972 | 3.21E-01 |
| MSMEG_2059 | NADH-quinone oxidoreductase chain e            | NA   | 1.049 | 7.52E-01 |
| MSMEG_2060 | NADH-quinone oxidoreductase, D subunit         | nuoD | 1.038 | 8.19E-01 |
| MSMEG_2061 | NADH-quinone oxidoreductase chain c            | NA   | 1.226 | 3.68E-01 |
| MSMEG_2062 | NADH-quinone oxidoreductase, B subunit         | nuoB | 1.022 | 8.40E-01 |
| MSMEG_2063 | NADH-quinone oxidoreductase, a subunit         | nuoA | 1.189 | 6.51E-02 |
| MSMEG_2064 | two-component system response regulator        | NA   | 1.111 | 3.83E-01 |
| MSMEG_2065 | Ycel like family protein                       | NA   | 1.031 | 9.08E-01 |
| MSMEG_2066 | conserved hypothetical protein                 | NA   | 0.931 | 6.80E-01 |
| MSMEG_2067 | methyltransferase type 12                      | NA   | 1.089 | 2.83E-01 |
| MSMEG_2068 | hypothetical protein                           | NA   | 0.832 | 1.22E-01 |
| MSMEG_2069 | phosphotransferase enzyme family protein       | NA   | 0.992 | 9.76E-01 |
| MSMEG_2070 | acyl-CoA dehydrogenase family protein          | NA   | 0.732 | 3.72E-02 |
| MSMEG_2071 | transcriptional regulator, TetR family protein | NA   | 1.303 | 3.98E-01 |
| MSMEG_2072 | 3-hydroxy-3-methylglutaryl-CoA lyase           | NA   | 0.771 | 9.21E-02 |
| MSMEG_2073 | CAIB/BAIF family protein                       | NA   | 0.918 | 4.72E-01 |
| MSMEG_2074 | conserved hypothetical protein                 | NA   | 0.736 | 8.25E-03 |
| MSMEG_2075 | homogentisate 1,2-dioxygenase                  | hmgA | 0.746 | 9.13E-05 |
| MSMEG_2076 | conserved hypothetical protein                 | NA   | 1.043 | 7.22E-01 |
| MSMEG_2077 | acyl-CoA dehydrogenase, C- domain protein      | NA   | 1.266 | 3.46E-01 |
| MSMEG_2078 | antigen 85-C                                   | NA   | 1.045 | 4.40E-01 |
| MSMEG_2079 | alcohol dehydrogenase                          | NA   | 0.914 | 2.29E-01 |
| MSMEG_2080 | putative acyl-CoA dehydrogenase                | NA   | 0.986 | 7.05E-01 |
| MSMEG_2081 | putative acyl-CoA dehydrogenase                | NA   | 0.768 | 8.86E-03 |



|            |                                                                                        |      |       |          |
|------------|----------------------------------------------------------------------------------------|------|-------|----------|
| MSMEG_2082 | hypothetical protein                                                                   | NA   | 0.912 | 4.73E-01 |
| MSMEG_2083 | inositol monophosphatase                                                               | hisN | 0.974 | 7.51E-01 |
| MSMEG_2084 | conserved hypothetical protein                                                         | NA   | 0.981 | 6.01E-01 |
| MSMEG_2085 | NADPH-ferredoxin reductase fpra; this gene contains a frame shift which is not the res | NA   | 0.894 | 2.28E-02 |
| MSMEG_2086 | peptide chain release factor 2                                                         | prfB | 1.157 | 1.41E-02 |
| MSMEG_2087 | transporter, small conductance mechanosensitive ion channel (MscS) family protein      | NA   | 1.161 | 1.83E-01 |
| MSMEG_2088 | hypothetical proline-rich protein                                                      | NA   | 1.067 | 1.47E-01 |
| MSMEG_2089 | cell division ATP-binding protein FtsE                                                 | ftsE | 1.245 | 2.41E-02 |
| MSMEG_2090 | putative cell division protein FtsX                                                    | NA   | 0.921 | 2.22E-01 |
| MSMEG_2091 | SsrA-binding protein                                                                   | smpB | 1.042 | 1.12E-01 |
| MSMEG_2092 | D-aminopeptidase                                                                       | NA   | 1.161 | 2.83E-01 |
| MSMEG_2094 | 56kDa selenium binding protein                                                         | NA   | 1.077 | 7.11E-01 |
| MSMEG_2095 | serine esterase, cutinase family protein                                               | NA   | 1.003 | 9.52E-01 |
| MSMEG_2096 | integral membrane protein                                                              | NA   | 1.295 | 4.15E-02 |
| MSMEG_2097 | Acyl-coenzyme A:6-aminopenicillanic acid acyl-transferase                              | NA   | 0.922 | 3.29E-01 |
| MSMEG_2098 | fumarylacetoacetate hydrolase family protein                                           | NA   | 0.963 | 8.08E-01 |
| MSMEG_2099 | ABC transporter, substrate binding protein [nitrate/sulfonate], putative               | NA   | 1.121 | 5.70E-01 |
| MSMEG_2100 | peptidase family protein M20/M25/M40                                                   | NA   | 1.036 | 8.09E-01 |
| MSMEG_2101 | taurine ABC transporter, permease protein; this gene contains a frame shift which is n | NA   | 1.532 | 3.70E-01 |
| MSMEG_2102 | nitrate transport ATP-binding protein NrtD                                             | NA   | 1.249 | 1.33E-01 |
| MSMEG_2103 | 5,10-methylenetetrahydromethanopterin reductase                                        | NA   | 1.046 | 8.26E-01 |
| MSMEG_2104 | GntR-family protein transcriptional regulator                                          | NA   | 0.840 | 8.77E-02 |
| MSMEG_2105 | ATP dependent DNA ligase                                                               | NA   | 1.093 | 6.21E-01 |
| MSMEG_2106 | putative transcriptional regulator                                                     | NA   | 1.347 | 1.89E-02 |
| MSMEG_2107 | conserved hypothetical protein                                                         | NA   | 1.002 | 9.76E-01 |
| MSMEG_2108 | conserved hypothetical protein                                                         | NA   | 0.995 | 9.49E-01 |
| MSMEG_2109 | conserved hypothetical protein                                                         | NA   | 1.226 | 4.33E-01 |
| MSMEG_2110 | conserved hypothetical protein                                                         | NA   | 1.047 | 1.82E-01 |
| MSMEG_2111 | chorismate mutase                                                                      | NA   | 1.086 | 3.54E-01 |
| MSMEG_2112 | secreted protein                                                                       | NA   | 1.052 | 7.40E-01 |
| MSMEG_2113 | hypothetical protein                                                                   | NA   | 1.165 | 3.34E-01 |

|            |                                                        |      |       |          |
|------------|--------------------------------------------------------|------|-------|----------|
| MSMEG_2114 | glucose-6-phosphate isomerase, putative                | NA   | 0.800 | 1.57E-02 |
| MSMEG_2115 | conserved hypothetical protein                         | NA   | 1.111 | 6.32E-01 |
| MSMEG_2116 | PTS system, glucose-specific IIBC component            | NA   | 0.753 | 1.21E-02 |
| MSMEG_2117 | beta-glucoside-specific EII permease                   | NA   | 0.758 | 2.54E-02 |
| MSMEG_2118 | glucosamine-6-phosphate isomerase                      | nagB | 0.731 | 3.29E-02 |
| MSMEG_2119 | N-acetylglucosamine-6-phosphate deacetylase            | nagA | 0.726 | 1.07E-02 |
| MSMEG_2120 | tetratricopeptide repeat family protein                | NA   | 1.166 | 3.51E-01 |
| MSMEG_2121 | multiphosphoryl transfer protein (MTP)                 | NA   | 0.469 | 3.74E-04 |
| MSMEG_2122 | dihydroxyacetone kinase, L subunit                     | NA   | 0.511 | 2.04E-03 |
| MSMEG_2123 | dihydroxyacetone kinase, DhaK subunit                  | dhaK | 0.452 | 6.61E-05 |
| MSMEG_2124 | glycerol uptake facilitator, MIP channel               | NA   | 0.366 | 6.19E-04 |
| MSMEG_2125 | glycerol operon regulatory protein                     | NA   | 0.976 | 5.76E-01 |
| MSMEG_2126 | hypothetical protein                                   | NA   | 1.318 | 2.94E-01 |
| MSMEG_2127 | conserved hypothetical protein                         | NA   | 1.171 | 2.86E-01 |
| MSMEG_2128 | malonyl CoA decarboxylase                              | NA   | 0.967 | 7.90E-01 |
| MSMEG_2129 | hypothetical protein                                   | NA   | 1.051 | 3.95E-01 |
| MSMEG_2130 | putative acyl-CoA dehydrogenase                        | NA   | 1.058 | 8.26E-01 |
| MSMEG_2131 | acyl-CoA synthase                                      | NA   | 0.897 | 4.34E-01 |
| MSMEG_2132 | acyl carrier protein Acp                               | NA   | 0.959 | 7.09E-01 |
| MSMEG_2133 | conserved hypothetical protein, putative               | NA   | 0.931 | 5.88E-01 |
| MSMEG_2134 | CrcB protein                                           | crcB | 1.104 | 4.36E-01 |
| MSMEG_2135 | putative CrcB protein                                  | NA   | 1.451 | 3.11E-03 |
| MSMEG_2136 | phosphoglucomutase, alpha-D-glucose phosphate-specific | pgm  | 0.888 | 3.50E-01 |
| MSMEG_2137 | permease of the major facilitator superfamily protein  | NA   | 1.230 | 2.92E-01 |
| MSMEG_2139 | hypothetical protein                                   | NA   | 1.065 | 6.24E-01 |
| MSMEG_2140 | Fic protein family protein                             | NA   | 1.404 | 1.07E-01 |
| MSMEG_2141 | gp35 protein                                           | NA   | 1.392 | 3.35E-01 |
| MSMEG_2142 | gp36 protein                                           | NA   | 0.956 | 1.95E-01 |
| MSMEG_2143 | hypothetical protein                                   | NA   | 1.177 | 7.72E-03 |
| MSMEG_2144 | conserved hypothetical protein                         | NA   | 1.108 | 2.23E-01 |
| MSMEG_2145 | conserved domain protein                               | NA   | 1.044 | 7.55E-01 |

|            |                                                                                          |      |       |          |
|------------|------------------------------------------------------------------------------------------|------|-------|----------|
| MSMEG_2146 | gp15 protein                                                                             | NA   | 1.223 | 3.07E-01 |
| MSMEG_2147 | gp16 protein; this gene contains a frame shift which is not the result of sequencing err | NA   | 1.036 | 4.32E-01 |
| MSMEG_2148 | HNH endonuclease domain protein                                                          | NA   | 1.113 | 6.16E-01 |
| MSMEG_2149 | hypothetical protein                                                                     | NA   | 1.072 | 3.62E-01 |
| MSMEG_2150 | putative transposition helper protein                                                    | NA   | 0.901 | 4.37E-01 |
| MSMEG_2150 | putative transposition helper protein                                                    | NA   | 1.293 | 2.32E-01 |
| MSMEG_2151 | transposase IstA protein, putative                                                       | NA   | 0.923 | 6.00E-01 |
| MSMEG_2151 | transposase IstA protein, putative                                                       | NA   | 1.924 | 2.99E-01 |
| MSMEG_2152 | hypothetical protein; this gene contains a frame shift which is not the result of sequen | NA   | 1.107 | 2.06E-01 |
| MSMEG_2153 | transcriptional regulator, TetR family protein                                           | NA   | 1.169 | 2.03E-01 |
| MSMEG_2154 | conserved hypothetical protein                                                           | NA   | 1.377 | 1.98E-01 |
| MSMEG_2155 | trans-2-enoyl-CoA reductase                                                              | NA   | 1.638 | 4.57E-01 |
| MSMEG_2156 | conserved hypothetical protein                                                           | NA   | 0.912 | 2.56E-01 |
| MSMEG_2157 | hypothetical protein                                                                     | NA   | 0.866 | 4.27E-01 |
| MSMEG_2158 | hypothetical protein                                                                     | NA   | 1.267 | 2.54E-01 |
| MSMEG_2159 | conserved hypothetical protein                                                           | NA   | 0.879 | 5.96E-01 |
| MSMEG_2160 | hypothetical protein                                                                     | NA   | 1.088 | 7.01E-01 |
| MSMEG_2161 | FadD9 protein; this region contains one or more premature stops and/or frameshifts v     | NA   | 0.901 | 1.98E-01 |
| MSMEG_2161 | FadD9 protein; this region contains one or more premature stops and/or frameshifts v     | NA   | 1.075 | 4.41E-01 |
| MSMEG_2161 | FadD9 protein; this region contains one or more premature stops and/or frameshifts v     | NA   | 1.412 | 1.28E-01 |
| MSMEG_2162 | MmcJ protein                                                                             | NA   | 0.927 | 1.73E-01 |
| MSMEG_2163 | aldehyde dehydrogenase                                                                   | NA   | 0.886 | 1.27E-01 |
| MSMEG_2164 | transcriptional regulator, putative                                                      | NA   | 1.039 | 7.48E-01 |
| MSMEG_2165 | transketolase, N- subunit                                                                | NA   | 1.669 | 4.88E-01 |
| MSMEG_2166 | transketoloase, C half                                                                   | NA   | 0.825 | 7.55E-02 |
| MSMEG_2167 | aminopeptidase, putative                                                                 | NA   | 0.760 | 1.14E-01 |
| MSMEG_2168 | hypothetical protein                                                                     | NA   | 1.215 | 5.77E-01 |
| MSMEG_2169 | acetyl-CoA carboxylase, carboxyl transferase, beta subunit                               | accD | 1.297 | 1.15E-01 |
| MSMEG_2170 | 3-hydroxyisobutyrate dehydrogenase family protein                                        | NA   | 0.969 | 5.90E-01 |
| MSMEG_2171 | L-carnitine dehydratase/bile acid-inducible protein F                                    | NA   | 1.224 | 3.74E-01 |
| MSMEG_2172 | dicarboxylate-carrier protein                                                            | NA   | 0.840 | 2.57E-01 |

|            |                                                   |      |        |          |
|------------|---------------------------------------------------|------|--------|----------|
| MSMEG_2173 | GntR-family protein transcriptional regulator     | NA   | 1.053  | 1.25E-01 |
| MSMEG_2174 | superfamily protein I DNA or RNA helicase         | NA   | 0.897  | 8.54E-02 |
| MSMEG_2175 | nitrilotriacetate monooxygenase component A       | NA   | 1.823  | 3.38E-02 |
| MSMEG_2176 | conserved hypothetical protein                    | NA   | 0.991  | 6.46E-01 |
| MSMEG_2177 | fmnh2-utilizing oxygenase                         | NA   | 1.645  | 2.08E-01 |
| MSMEG_2178 | integral membrane protein                         | NA   | 1.173  | 5.12E-01 |
| MSMEG_2179 | transcriptional regulatory protein                | NA   | 1.000  | 9.87E-01 |
| MSMEG_2180 | RemK protein                                      | NA   | 9.594  | 3.39E-01 |
| MSMEG_2181 | cell filamentation protein                        | NA   | 22.577 | 3.83E-01 |
| MSMEG_2182 | transcriptional regulator                         | NA   | 1.101  | 2.72E-01 |
| MSMEG_2183 | conserved hypothetical protein                    | NA   | 0.977  | 8.02E-01 |
| MSMEG_2184 | amino acid permease                               | NA   | 1.080  | 3.55E-01 |
| MSMEG_2185 | conserved hypothetical protein                    | NA   | 2.276  | 4.23E-01 |
| MSMEG_2186 | conserved hypothetical protein                    | NA   | 0.900  | 2.12E-01 |
| MSMEG_2187 | urea amidolyase                                   | NA   | 1.168  | 1.03E-01 |
| MSMEG_2188 | integral membrane protein                         | NA   | 1.361  | 1.34E-01 |
| MSMEG_2189 | allophanate hydrolase                             | atzF | 1.261  | 2.98E-02 |
| MSMEG_2190 | acyl-CoA dehydrogenase domain protein             | NA   | 2.258  | 2.70E-01 |
| MSMEG_2191 | acyl-CoA dehydrogenase family protein             | NA   | 1.141  | 9.69E-02 |
| MSMEG_2192 | conserved hypothetical protein                    | NA   | 1.023  | 8.36E-01 |
| MSMEG_2193 | transcriptional regulator, TetR family protein    | NA   | 1.011  | 7.48E-01 |
| MSMEG_2194 | MerR-family protein transcriptional regulator     | NA   | 0.925  | 4.28E-01 |
| MSMEG_2195 | transcriptional regulator, TetR family protein    | NA   | 0.959  | 4.15E-01 |
| MSMEG_2196 | sensory box/response regulator                    | NA   | 0.942  | 2.78E-03 |
| MSMEG_2197 | hypothetical protein                              | NA   | 1.159  | 1.33E-01 |
| MSMEG_2198 | ThiF family protein                               | NA   | 0.964  | 3.05E-01 |
| MSMEG_2199 | conserved hypothetical protein                    | NA   | 0.976  | 6.64E-01 |
| MSMEG_2200 | formyltetrahydrofolate deformylase                | purU | 0.987  | 8.39E-01 |
| MSMEG_2201 | ZbpA protein                                      | NA   | 0.790  | 1.82E-02 |
| MSMEG_2202 | dimethylaniline monooxygenase [N-oxide-forming] 5 | NA   | 0.834  | 9.11E-03 |
| MSMEG_2203 | alpha/beta hydrolase                              | NA   | 0.801  | 1.28E-01 |

|            |                                                                                           |      |       |          |
|------------|-------------------------------------------------------------------------------------------|------|-------|----------|
| MSMEG_2204 | carveol dehydrogenase ((+)-trans-carveol dehydrogenase)                                   | NA   | 1.218 | 9.70E-02 |
| MSMEG_2205 | putative acyl-CoA dehydrogenase                                                           | NA   | 1.117 | 2.27E-02 |
| MSMEG_2206 | 3-oxoacyl-(acyl-carrier-protein) reductase                                                | fabG | 1.189 | 7.06E-02 |
| MSMEG_2207 | beta-ketothiolase                                                                         | NA   | 1.101 | 3.33E-01 |
| MSMEG_2208 | acyl-CoA dehydrogenase                                                                    | NA   | 1.041 | 6.36E-01 |
| MSMEG_2209 | transcriptional regulator, GntR family protein                                            | NA   | 1.016 | 8.47E-01 |
| MSMEG_2210 | CaiB/BaiF family protein; this gene contains a frame shift which is not the result of seq | NA   | 1.075 | 5.37E-01 |
| MSMEG_2210 | CaiB/BaiF family protein; this gene contains a frame shift which is not the result of seq | NA   | 1.430 | 2.10E-01 |
| MSMEG_2211 | DNA-binding protein                                                                       | NA   | 0.942 | 6.84E-01 |
| MSMEG_2212 | short chain dehydrogenase                                                                 | NA   | 1.224 | 2.43E-01 |
| MSMEG_2213 | O-methyltransferase                                                                       | NA   | 0.993 | 9.80E-01 |
| MSMEG_2214 | alcohol dehydrogenase B; this region contains one or more premature stops and/or fr       | NA   | 1.282 | 3.63E-01 |
| MSMEG_2215 | AMP-binding enzyme                                                                        | NA   | 1.050 | 7.54E-01 |
| MSMEG_2216 | AMP-binding enzyme                                                                        | NA   | 1.141 | 7.00E-01 |
| MSMEG_2217 | AMP-dependent synthetase and ligase                                                       | NA   | 1.013 | 8.47E-01 |
| MSMEG_2218 | enoyl-CoA hydratase/isomerase family protein                                              | NA   | 1.067 | 5.10E-01 |
| MSMEG_2219 | enoyl-CoA hydratase/isomerase family protein                                              | NA   | 2.104 | 1.64E-01 |
| MSMEG_2220 | enoyl-CoA hydratase/isomerase                                                             | NA   | 0.938 | 6.98E-01 |
| MSMEG_2222 | hypothetical protein                                                                      | NA   | 0.711 | 6.35E-02 |
| MSMEG_2222 | hypothetical protein                                                                      | NA   | 2.019 | 3.24E-01 |
| MSMEG_2223 | enoyl-CoA hydratase/isomerase family protein                                              | NA   | 1.157 | 4.38E-01 |
| MSMEG_2224 | acetyl-CoA C-acyltransferase                                                              | NA   | 1.210 | 1.31E-01 |
| MSMEG_2225 | transcriptional regulator, TetR family protein                                            | NA   | 0.946 | 4.03E-01 |
| MSMEG_2226 | hypothetical protein                                                                      | NA   | 1.017 | 8.81E-01 |
| MSMEG_2227 | carnitinyl-CoA dehydratase                                                                | NA   | 1.003 | 9.74E-01 |
| MSMEG_2228 | oxidoreductase, short chain dehydrogenase/reductase family protein                        | NA   | 0.941 | 5.45E-01 |
| MSMEG_2229 | enoyl-CoA hydratase                                                                       | NA   | 1.027 | 3.74E-01 |
| MSMEG_2230 | amidohydrolase family protein                                                             | NA   | 0.981 | 8.76E-01 |
| MSMEG_2231 | AMP-binding enzyme                                                                        | NA   | 0.991 | 8.33E-01 |
| MSMEG_2232 | amidohydrolase family protein                                                             | NA   | 1.602 | 3.49E-01 |
| MSMEG_2233 | acyl-CoA dehydrogenase, C- domain protein                                                 | NA   | 1.090 | 4.94E-01 |

|            |                                                |      |       |          |
|------------|------------------------------------------------|------|-------|----------|
| MSMEG_2234 | acyl-CoA dehydrogenase, middle domain protein  | NA   | 0.949 | 7.72E-01 |
| MSMEG_2235 | amidohydrolase family protein                  | NA   | 1.397 | 2.96E-01 |
| MSMEG_2236 | putative thiolase                              | NA   | 1.252 | 5.19E-01 |
| MSMEG_2237 | anaerobic dehydrogenase, typically             | NA   | 1.698 | 1.60E-01 |
| MSMEG_2238 | aldehyde dehydrogenase (NAD) family protein    | NA   | 0.991 | 9.20E-01 |
| MSMEG_2239 | transcriptional regulator, TetR family protein | NA   | 1.103 | 4.68E-01 |
| MSMEG_2240 | cytochrome P450                                | NA   | 1.114 | 3.66E-01 |
| MSMEG_2241 | medium chain acyl-CoA synthetase               | NA   | 1.504 | 2.96E-01 |
| MSMEG_2242 | coniferyl aldehyde dehydrogenase               | NA   | 1.123 | 3.82E-01 |
| MSMEG_2243 | isochorismatase family protein                 | NA   | 1.056 | 8.31E-01 |
| MSMEG_2244 | Rieske [2Fe-2S] domain protein                 | NA   | 0.973 | 7.33E-01 |
| MSMEG_2245 | bile-acid 7-alpha dehydratase                  | NA   | 1.045 | 5.88E-01 |
| MSMEG_2246 | conserved hypothetical protein                 | NA   | 1.340 | 6.36E-02 |
| MSMEG_2247 | dihydrokaempferol 4-reductase                  | NA   | 1.067 | 8.02E-01 |
| MSMEG_2248 | two-component system sensor kinase             | NA   | 1.249 | 1.18E-01 |
| MSMEG_2249 | conserved hypothetical protein                 | NA   | 1.017 | 8.52E-01 |
| MSMEG_2250 | hypothetical protein                           | NA   | 1.065 | 7.56E-01 |
| MSMEG_2251 | nitrate/nitrite response regulator protein     | NA   | 1.071 | 5.16E-01 |
| MSMEG_2252 | flavin-type hydroxylase                        | NA   | 0.994 | 9.33E-01 |
| MSMEG_2253 | hypothetical protein                           | NA   | 1.046 | 8.40E-01 |
| MSMEG_2254 | oxalate decarboxylase OxdC, putative           | NA   | 1.543 | 2.45E-01 |
| MSMEG_2255 | Carboxyl transferase domain protein            | NA   | 0.927 | 2.05E-01 |
| MSMEG_2256 | conserved hypothetical protein                 | NA   | 0.953 | 4.91E-01 |
| MSMEG_2257 | cytochrome P450-terp                           | NA   | 1.125 | 5.65E-01 |
| MSMEG_2258 | conserved hypothetical protein                 | NA   | 0.633 | 9.97E-04 |
| MSMEG_2259 | carbon starvation protein A                    | NA   | 0.646 | 5.28E-03 |
| MSMEG_2260 | putative transcriptional regulator             | NA   | 1.031 | 5.30E-01 |
| MSMEG_2261 | hypothetical protein                           | NA   | 1.041 | 2.41E-01 |
| MSMEG_2262 | hydrogenase-2, small subunit                   | hybA | 0.887 | 3.48E-01 |
| MSMEG_2263 | hydrogenase-2, large subunit                   | hybC | 1.103 | 5.84E-01 |
| MSMEG_2264 | peptidase M52, hydrogen uptake protein         | NA   | 0.905 | 2.43E-01 |

|            |                                                                                         |      |       |          |
|------------|-----------------------------------------------------------------------------------------|------|-------|----------|
| MSMEG_2265 | hypothetical protein                                                                    | NA   | 1.152 | 3.32E-01 |
| MSMEG_2266 | hypothetical protein                                                                    | NA   | 0.837 | 1.58E-02 |
| MSMEG_2267 | tetratricopeptide repeat domain protein                                                 | NA   | 0.902 | 6.20E-01 |
| MSMEG_2268 | conserved hypothetical protein                                                          | NA   | 0.970 | 8.66E-01 |
| MSMEG_2269 | NHL repeat protein                                                                      | NA   | 1.058 | 5.39E-01 |
| MSMEG_2270 | hypothetical protein                                                                    | NA   | 0.860 | 2.52E-01 |
| MSMEG_2271 | hydrogenase accessory protein HypB                                                      | hypB | 0.708 | 4.19E-03 |
| MSMEG_2271 | hydrogenase accessory protein HypB                                                      | hypB | 0.763 | 5.46E-03 |
| MSMEG_2272 | hydrogenase nickel insertion protein HypA                                               | hypA | 0.814 | 1.47E-01 |
| MSMEG_2273 | [NiFe] hydrogenase maturation protein HypF                                              | hypF | 0.646 | 2.19E-02 |
| MSMEG_2274 | hydrogenase assembly chaperone HypC/HupF                                                | hypC | 0.631 | 6.38E-03 |
| MSMEG_2275 | hydrogenase expression/formation protein HypD                                           | hypD | 0.568 | 5.18E-03 |
| MSMEG_2276 | hydrogenase expression/formation protein HypE                                           | hypE | 0.982 | 8.39E-01 |
| MSMEG_2277 | DNA ligase I, ATP-dependent                                                             | dnl1 | 1.947 | 3.35E-01 |
| MSMEG_2278 | membrane-bound oxidoreductase                                                           | NA   | 0.799 | 8.83E-02 |
| MSMEG_2279 | 3-hydroxyacyl-CoA dehydrogenase type-2                                                  | NA   | 1.258 | 1.12E-01 |
| MSMEG_2280 | pyruvate dehydrogenase                                                                  | NA   | 0.932 | 8.27E-02 |
| MSMEG_2281 | This gene is disrupted by an IS1096 element.; conserved hypothetical protein, interrupt | NA   | 1.099 | 3.91E-01 |
| MSMEG_2284 | This gene is disrupted by an IS1096 element.; conserved hypothetical protein, interrupt | NA   | 1.187 | 3.11E-02 |
| MSMEG_2285 | methyltransferase type 11                                                               | NA   | 1.023 | 9.39E-01 |
| MSMEG_2286 | aminoglycoside phosphotransferase                                                       | NA   | 0.908 | 3.21E-01 |
| MSMEG_2286 | aminoglycoside phosphotransferase                                                       | NA   | 1.161 | 3.90E-01 |
| MSMEG_2287 | transport protein                                                                       | NA   | 1.010 | 9.22E-01 |
| MSMEG_2287 | transport protein                                                                       | NA   | 1.080 | 4.18E-01 |
| MSMEG_2288 | conserved hypothetical protein                                                          | NA   | 1.030 | 8.38E-01 |
| MSMEG_2288 | conserved hypothetical protein                                                          | NA   | 1.072 | 6.34E-01 |
| MSMEG_2289 | cytochrome p450                                                                         | NA   | 0.600 | 5.36E-03 |
| MSMEG_2289 | cytochrome p450                                                                         | NA   | 0.751 | 2.10E-02 |
| MSMEG_2290 | transcriptional regulator, TetR family protein                                          | NA   | 1.050 | 2.74E-01 |
| MSMEG_2290 | transcriptional regulator, TetR family protein                                          | NA   | 1.104 | 1.33E-01 |
| MSMEG_2291 | short chain dehydrogenase                                                               | NA   | 1.018 | 7.77E-01 |

|            |                                                                                                              |      |       |          |
|------------|--------------------------------------------------------------------------------------------------------------|------|-------|----------|
| MSMEG_2291 | short chain dehydrogenase                                                                                    | NA   | 1.098 | 2.37E-01 |
| MSMEG_2292 | alkaline phosphatase                                                                                         | NA   | 1.354 | 8.76E-02 |
| MSMEG_2292 | alkaline phosphatase                                                                                         | NA   | 1.588 | 5.77E-02 |
| MSMEG_2293 | conserved hypothetical protein                                                                               | NA   | 1.065 | 4.14E-01 |
| MSMEG_2293 | conserved hypothetical protein                                                                               | NA   | 1.336 | 1.37E-01 |
| MSMEG_2294 | DNA polymerase IV                                                                                            | dinB | 0.802 | 6.79E-02 |
| MSMEG_2294 | DNA polymerase IV                                                                                            | dinB | 1.074 | 4.50E-01 |
| MSMEG_2295 | transcriptional regulator, TetR family protein                                                               | NA   | 0.877 | 3.34E-02 |
| MSMEG_2295 | transcriptional regulator, TetR family protein                                                               | NA   | 1.046 | 4.43E-01 |
| MSMEG_2296 | secreted protein                                                                                             | NA   | 2.592 | 2.43E-02 |
| MSMEG_2297 | glutaredoxin                                                                                                 | NA   | 0.839 | 6.37E-03 |
| MSMEG_2297 | glutaredoxin                                                                                                 | NA   | 0.871 | 5.17E-03 |
| MSMEG_2298 | protein NrdI; this gene contains a frame shift which is not the result of sequencing error                   | NA   | 0.752 | 2.58E-03 |
| MSMEG_2298 | protein NrdI; this gene contains a frame shift which is not the result of sequencing error                   | NA   | 0.803 | 1.36E-02 |
| MSMEG_2299 | ribonucleoside-diphosphate reductase, alpha subunit                                                          | NA   | 0.756 | 5.43E-03 |
| MSMEG_2299 | ribonucleoside-diphosphate reductase, alpha subunit                                                          | NA   | 0.852 | 2.22E-04 |
| MSMEG_2300 | conserved hypothetical protein; this gene contains a frame shift which is not the result of sequencing error | NA   | 0.924 | 3.84E-01 |
| MSMEG_2300 | conserved hypothetical protein; this gene contains a frame shift which is not the result of sequencing error | NA   | 1.065 | 4.60E-01 |
| MSMEG_2300 | conserved hypothetical protein; this gene contains a frame shift which is not the result of sequencing error | NA   | 1.987 | 2.56E-01 |
| MSMEG_2301 | glyoxalase/bleomycin resistance protein/dioxygenase                                                          | NA   | 1.028 | 7.33E-01 |
| MSMEG_2301 | glyoxalase/bleomycin resistance protein/dioxygenase                                                          | NA   | 1.191 | 5.10E-02 |
| MSMEG_2302 | conserved hypothetical protein                                                                               | NA   | 1.678 | 3.06E-01 |
| MSMEG_2303 | integral membrane transporter                                                                                | NA   | 0.850 | 1.80E-01 |
| MSMEG_2303 | integral membrane transporter                                                                                | NA   | 0.938 | 4.53E-01 |
| MSMEG_2304 | hypothetical protein                                                                                         | NA   | 0.875 | 1.83E-01 |
| MSMEG_2305 | TetR-family protein transcriptional regulator                                                                | NA   | 1.008 | 8.32E-01 |
| MSMEG_2306 | putative acetyltransferase                                                                                   | NA   | 1.341 | 1.08E-01 |
| MSMEG_2307 | conserved hypothetical protein                                                                               | NA   | 1.102 | 4.20E-01 |
| MSMEG_2307 | conserved hypothetical protein                                                                               | NA   | 1.268 | 8.75E-02 |
| MSMEG_2308 | geranylgeranyl reductase                                                                                     | NA   | 0.914 | 1.15E-01 |
| MSMEG_2309 | probable transcriptional regulatory protein                                                                  | NA   | 0.940 | 3.49E-01 |



|            |                                                                                          |      |       |          |
|------------|------------------------------------------------------------------------------------------|------|-------|----------|
| MSMEG_2309 | probable transcriptional regulatory protein                                              | NA   | 0.974 | 7.01E-01 |
| MSMEG_2310 | monooxygenase                                                                            | NA   | 1.065 | 6.44E-02 |
| MSMEG_2310 | monooxygenase                                                                            | NA   | 1.182 | 3.27E-03 |
| MSMEG_2311 | conserved hypothetical protein                                                           | NA   | 1.395 | 5.45E-04 |
| MSMEG_2311 | conserved hypothetical protein                                                           | NA   | 1.458 | 1.70E-03 |
| MSMEG_2312 | hypothetical protein                                                                     | NA   | 0.947 | 5.60E-01 |
| MSMEG_2313 | ribonucleoside-diphosphate reductase, beta subunit                                       | NA   | 0.809 | 4.17E-04 |
| MSMEG_2313 | ribonucleoside-diphosphate reductase, beta subunit                                       | NA   | 0.866 | 2.16E-03 |
| MSMEG_2314 | putative esterase family protein                                                         | NA   | 0.998 | 9.81E-01 |
| MSMEG_2314 | putative esterase family protein                                                         | NA   | 1.139 | 2.43E-01 |
| MSMEG_2315 | conserved hypothetical protein                                                           | NA   | 0.877 | 4.92E-02 |
| MSMEG_2315 | conserved hypothetical protein                                                           | NA   | 1.026 | 5.44E-01 |
| MSMEG_2316 | monooxygenase, NtaA/SnaA/SoxA family; this gene contains a frame shift which is not      | NA   | 1.167 | 3.48E-01 |
| MSMEG_2316 | monooxygenase, NtaA/SnaA/SoxA family; this gene contains a frame shift which is not      | NA   | 1.326 | 9.53E-02 |
| MSMEG_2316 | monooxygenase, NtaA/SnaA/SoxA family; this gene contains a frame shift which is not      | NA   | 2.490 | 2.83E-01 |
| MSMEG_2317 | alcohol dehydrogenase, zinc-containing                                                   | NA   | 1.246 | 4.64E-02 |
| MSMEG_2317 | alcohol dehydrogenase, zinc-containing                                                   | NA   | 1.322 | 4.47E-02 |
| MSMEG_2318 | GTP cyclohydrolase II                                                                    | NA   | 1.027 | 5.55E-01 |
| MSMEG_2318 | GTP cyclohydrolase II                                                                    | NA   | 1.109 | 1.79E-02 |
| MSMEG_2319 | Periplasmic binding protein                                                              | NA   | 1.030 | 5.88E-01 |
| MSMEG_2319 | Periplasmic binding protein                                                              | NA   | 1.111 | 9.33E-02 |
| MSMEG_2320 | cytochrome c oxidase, subunit I; this gene contains a frame shift which is not the resul | ctaD | 0.858 | 6.33E-02 |
| MSMEG_2320 | cytochrome c oxidase, subunit I; this gene contains a frame shift which is not the resul | ctaD | 0.985 | 7.84E-01 |
| MSMEG_2321 | phosphoserine phosphatase                                                                | serB | 1.019 | 8.09E-01 |
| MSMEG_2321 | phosphoserine phosphatase                                                                | serB | 1.060 | 5.13E-01 |
| MSMEG_2322 | hypothetical protein                                                                     | NA   | 1.055 | 5.17E-01 |
| MSMEG_2322 | hypothetical protein                                                                     | NA   | 1.112 | 3.07E-01 |
| MSMEG_2323 | GntR-family protein transcriptional regulator                                            | NA   | 1.184 | 8.46E-02 |
| MSMEG_2324 | hypothetical protein                                                                     | NA   | 0.936 | 3.39E-01 |
| MSMEG_2325 | integral membrane protein                                                                | NA   | 0.901 | 3.00E-01 |
| MSMEG_2325 | integral membrane protein                                                                | NA   | 1.047 | 3.48E-01 |

|            |                                                                                                           |     |       |          |
|------------|-----------------------------------------------------------------------------------------------------------|-----|-------|----------|
| MSMEG_2326 | ABC-type molybdenum transport system, ATPase component                                                    | NA  | 1.054 | 5.09E-01 |
| MSMEG_2326 | ABC-type molybdenum transport system, ATPase component                                                    | NA  | 1.122 | 2.65E-01 |
| MSMEG_2327 | nudix hydrolase                                                                                           | NA  | 0.921 | 8.70E-02 |
| MSMEG_2327 | nudix hydrolase                                                                                           | NA  | 0.965 | 4.66E-01 |
| MSMEG_2328 | probable enoyl-CoA hydratase                                                                              | NA  | 0.930 | 4.13E-02 |
| MSMEG_2328 | probable enoyl-CoA hydratase                                                                              | NA  | 0.965 | 2.61E-01 |
| MSMEG_2329 | methyltransferase, UbiE/COQ5 family protein                                                               | NA  | 0.955 | 2.88E-01 |
| MSMEG_2329 | methyltransferase, UbiE/COQ5 family protein                                                               | NA  | 1.053 | 3.62E-01 |
| MSMEG_2330 | SAM-dependent methyltransferase                                                                           | NA  | 1.074 | 3.03E-01 |
| MSMEG_2330 | SAM-dependent methyltransferase                                                                           | NA  | 1.241 | 7.25E-03 |
| MSMEG_2331 | immunogenic protein MPB64/MPT64                                                                           | NA  | 1.121 | 3.44E-02 |
| MSMEG_2331 | immunogenic protein MPB64/MPT64                                                                           | NA  | 1.212 | 6.86E-03 |
| MSMEG_2332 | amino acid carrier protein                                                                                | NA  | 1.137 | 8.05E-02 |
| MSMEG_2332 | amino acid carrier protein                                                                                | NA  | 1.255 | 2.88E-02 |
| MSMEG_2333 | conserved hypothetical protein                                                                            | NA  | 0.977 | 7.26E-01 |
| MSMEG_2334 | hypothetical protein                                                                                      | NA  | 1.391 | 2.90E-01 |
| MSMEG_2335 | hexapeptide transferase family protein                                                                    | NA  | 1.140 | 1.53E-01 |
| MSMEG_2336 | conserved hypothetical protein; this gene contains a frame shift which is not the result of               | NA  | 0.975 | 8.65E-01 |
| MSMEG_2336 | conserved hypothetical protein; this gene contains a frame shift which is not the result of               | NA  | 1.106 | 4.44E-01 |
| MSMEG_2337 | isopentenyl-diphosphate delta-isomerase, type 2                                                           | fni | 1.110 | 5.58E-01 |
| MSMEG_2337 | isopentenyl-diphosphate delta-isomerase, type 2                                                           | fni | 1.173 | 3.90E-01 |
| MSMEG_2340 | hypothetical protein                                                                                      | NA  | 1.085 | 7.53E-01 |
| MSMEG_2341 | conserved hypothetical protein                                                                            | NA  | 0.986 | 8.86E-01 |
| MSMEG_2342 | putative glycosyltransferase                                                                              | NA  | 1.099 | 5.84E-01 |
| MSMEG_2343 | methylesterase                                                                                            | NA  | 1.019 | 7.38E-01 |
| MSMEG_2344 | dehydrogenase                                                                                             | NA  | 1.304 | 4.14E-01 |
| MSMEG_2345 | lycopene cyclase; this gene contains a frame shift which is not the result of sequencing                  | NA  | 1.160 | 6.63E-01 |
| MSMEG_2346 | phytoene synthase                                                                                         | NA  | 1.157 | 2.36E-01 |
| MSMEG_2347 | phytoene dehydrogenase                                                                                    | NA  | 1.059 | 8.64E-01 |
| MSMEG_2348 | glycosyl transferase, group 1 family protein; this gene contains a frame shift which is not the result of | NA  | 0.783 | 1.40E-02 |
| MSMEG_2348 | glycosyl transferase, group 1 family protein; this gene contains a frame shift which is not the result of | NA  | 0.865 | 7.88E-02 |

|            |                                                                                          |      |       |          |
|------------|------------------------------------------------------------------------------------------|------|-------|----------|
| MSMEG_2349 | glycosyl hydrolase, family protein 57                                                    | NA   | 0.984 | 8.12E-01 |
| MSMEG_2350 | conserved hypothetical protein                                                           | NA   | 0.861 | 6.23E-02 |
| MSMEG_2351 | electron transfer flavoprotein, beta subunit                                             | etfB | 0.714 | 5.94E-04 |
| MSMEG_2352 | electron transfer flavoprotein, alpha subunit                                            | etfA | 0.906 | 2.49E-01 |
| MSMEG_2353 | secreted protein                                                                         | NA   | 1.495 | 2.05E-01 |
| MSMEG_2354 | oxidoreductase                                                                           | NA   | 1.711 | 2.15E-01 |
| MSMEG_2355 | conserved hypothetical protein                                                           | NA   | 1.491 | 2.52E-01 |
| MSMEG_2356 | acyltransferase                                                                          | NA   | 1.971 | 3.50E-01 |
| MSMEG_2357 | cysteine desulfurase                                                                     | NA   | 1.082 | 3.53E-01 |
| MSMEG_2358 | tRNA (5-methylaminomethyl-2-thiouridylate)-methyltransferase                             | trmU | 1.066 | 1.76E-01 |
| MSMEG_2359 | methionine synthase, vitamin-B12 independent                                             | NA   | 0.923 | 2.07E-01 |
| MSMEG_2360 | 4-coumarate:CoA ligase                                                                   | NA   | 0.991 | 8.13E-01 |
| MSMEG_2361 | phosphoribosylglycinamide formyltransferase                                              | NA   | 0.997 | 9.57E-01 |
| MSMEG_2362 | DNA ligase, NAD-dependent                                                                | ligA | 1.205 | 3.21E-01 |
| MSMEG_2363 | amino acid-binding ACT                                                                   | NA   | 1.004 | 9.55E-01 |
| MSMEG_2364 | glutamyl-tRNA(Gln) amidotransferase, C subunit                                           | gatC | 0.905 | 3.71E-02 |
| MSMEG_2365 | glutamyl-tRNA(Gln) amidotransferase subunit A                                            | NA   | 0.896 | 2.47E-01 |
| MSMEG_2366 | 6-phosphofructokinase 1; this gene contains a frame shift which is not the result of ser | NA   | 0.978 | 7.84E-01 |
| MSMEG_2367 | aspartyl/glutamyl-tRNA(Asn/Gln) amidotransferase subunit B                               | NA   | 1.258 | 7.42E-02 |
| MSMEG_2368 | transcriptional regulator, TetR family protein domain protein, putative                  | NA   | 1.057 | 5.85E-01 |
| MSMEG_2369 | LppZ protein                                                                             | NA   | 1.105 | 3.68E-02 |
| MSMEG_2370 | DoxX subfamily protein, putative                                                         | NA   | 0.955 | 2.49E-01 |
| MSMEG_2371 | Low molecular weight protein antigen 6                                                   | NA   | 1.166 | 1.56E-02 |
| MSMEG_2372 | acetolactate synthase, large subunit, biosynthetic type                                  | ilvB | 1.175 | 1.30E-01 |
| MSMEG_2373 | acetolactate synthase, small subunit                                                     | ilvN | 1.124 | 1.02E-01 |
| MSMEG_2374 | ketol-acid reductoisomerase                                                              | ilvC | 1.294 | 5.55E-03 |
| MSMEG_2375 | NAD(P)H:quinone oxidoreductase, type IV                                                  | wrbA | 1.248 | 4.12E-02 |
| MSMEG_2376 | conserved hypothetical protein                                                           | NA   | 1.675 | 2.09E-01 |
| MSMEG_2377 | P49 protein                                                                              | NA   | 1.246 | 2.16E-01 |
| MSMEG_2378 | D-3-phosphoglycerate dehydrogenase                                                       | serA | 1.015 | 8.81E-01 |
| MSMEG_2379 | 3-isopropylmalate dehydrogenase                                                          | leuB | 0.990 | 8.74E-01 |

|            |                                                          |      |       |          |
|------------|----------------------------------------------------------|------|-------|----------|
| MSMEG_2380 | sugar transporter family protein                         | NA   | 1.448 | 3.63E-02 |
| MSMEG_2381 | conserved hypothetical protein                           | NA   | 1.388 | 4.34E-02 |
| MSMEG_2382 | 5-carboxymethyl-2-hydroxymuconate delta-isomerase        | NA   | 1.033 | 5.30E-01 |
| MSMEG_2383 | glutamyl-tRNA synthetase                                 | gltX | 0.998 | 9.60E-01 |
| MSMEG_2386 | transcriptional regulator, lclR family protein           | NA   | 1.134 | 2.30E-01 |
| MSMEG_2387 | 3-isopropylmalate dehydratase, large subunit             | leuC | 0.873 | 2.97E-02 |
| MSMEG_2388 | 3-isopropylmalate dehydratase, small subunit             | leuD | 0.888 | 4.55E-03 |
| MSMEG_2389 | DNA-binding protein HU                                   | hup  | 0.928 | 4.40E-01 |
| MSMEG_2390 | hydrolase, NUDIX family protein                          | NA   | 1.054 | 3.48E-01 |
| MSMEG_2391 | polyphosphate kinase                                     | ppk  | 0.980 | 7.44E-01 |
| MSMEG_2392 | conserved hypothetical protein                           | NA   | 0.973 | 2.17E-01 |
| MSMEG_2393 | NAD-dependent glycerol-3-phosphate dehydrogenase         | gpsA | 1.121 | 2.81E-02 |
| MSMEG_2394 | putative cystathionine gamma-synthase                    | NA   | 1.129 | 2.88E-01 |
| MSMEG_2395 | D-alanine--D-alanine ligase                              | NA   | 1.335 | 1.26E-02 |
| MSMEG_2396 | conserved hypothetical protein                           | NA   | 1.164 | 3.34E-01 |
| MSMEG_2397 | transcriptional regulatory protein, AsnC family protein  | NA   | 1.145 | 4.61E-02 |
| MSMEG_2398 | thiamine-monophosphate kinase                            | thiL | 1.132 | 2.41E-01 |
| MSMEG_2399 | uracil-DNA glycosylase                                   | ung  | 1.138 | 2.48E-01 |
| MSMEG_2400 | ribosomal protein L28                                    | rpmB | 1.275 | 1.53E-01 |
| MSMEG_2401 | hypothetical protein                                     | NA   | 1.093 | 6.52E-01 |
| MSMEG_2402 | dihydroxyacetone kinase                                  | NA   | 0.869 | 2.28E-02 |
| MSMEG_2403 | ATP-dependent DNA helicase RecG                          | recG | 1.056 | 4.40E-01 |
| MSMEG_2404 | extracellular deoxyribonuclease                          | NA   | 0.835 | 1.14E-01 |
| MSMEG_2405 | MarR-family protein transcriptional regulator            | NA   | 2.532 | 2.02E-01 |
| MSMEG_2406 | transcriptional regulator, TetR family protein, putative | NA   | 1.086 | 7.63E-01 |
| MSMEG_2407 | morphine 6-dehydrogenase                                 | NA   | 1.194 | 1.49E-01 |
| MSMEG_2408 | 2,5-diketo-D-gluconic acid reductase A                   | NA   | 1.163 | 7.98E-02 |
| MSMEG_2409 | alpha/beta hydrolase fold family protein                 | NA   | 0.967 | 7.37E-01 |
| MSMEG_2410 | putative serine-threonine protein kinase                 | NA   | 1.003 | 9.35E-01 |
| MSMEG_2411 | conserved integral membrane protein                      | NA   | 1.171 | 1.50E-01 |
| MSMEG_2412 | pyruvate carboxylase                                     | pyc  | 1.087 | 3.59E-01 |

|            |                                                  |      |       |          |
|------------|--------------------------------------------------|------|-------|----------|
| MSMEG_2413 | putative methyltransferase                       | NA   | 1.308 | 1.04E-01 |
| MSMEG_2414 | pantetheine-phosphate adenylyltransferase        | coaD | 1.241 | 2.20E-02 |
| MSMEG_2415 | hemerythrin HHE cation binding region            | NA   | 1.218 | 3.57E-01 |
| MSMEG_2416 | conserved hypothetical protein                   | NA   | 0.856 | 5.69E-02 |
| MSMEG_2417 | conserved hypothetical protein                   | NA   | 1.039 | 3.43E-01 |
| MSMEG_2418 | ribonuclease III                                 | rnc  | 0.983 | 7.13E-01 |
| MSMEG_2419 | formamidopyrimidine-DNA glycosylase              | mutM | 1.359 | 3.71E-02 |
| MSMEG_2420 | hypothetical protein                             | NA   | 0.950 | 1.32E-01 |
| MSMEG_2421 | conserved hypothetical protein                   | NA   | 1.171 | 1.04E-01 |
| MSMEG_2422 | acylphosphatase                                  | NA   | 1.030 | 5.29E-01 |
| MSMEG_2423 | chromosome segregation protein SMC               | smc  | 0.936 | 2.31E-01 |
| MSMEG_2424 | signal recognition particle-docking protein FtsY | ftsY | 1.135 | 3.58E-02 |
| MSMEG_2425 | ammonium transporter                             | amt  | 0.862 | 1.14E-01 |
| MSMEG_2426 | nitrogen regulatory protein P-II                 | NA   | 0.872 | 3.32E-01 |
| MSMEG_2427 | protein-P-II uridylyltransferase                 | glnD | 1.127 | 1.68E-01 |
| MSMEG_2428 | DNA-binding protein                              | NA   | 0.865 | 3.70E-01 |
| MSMEG_2429 | aldo/keto reductase                              | NA   | 1.004 | 9.85E-01 |
| MSMEG_2430 | signal recognition particle protein              | ffh  | 1.049 | 4.19E-01 |
| MSMEG_2431 | amidohydrolase 3                                 | NA   | 1.014 | 8.58E-01 |
| MSMEG_2432 | D-alanyl-D-alanine carboxypeptidase              | NA   | 0.982 | 8.91E-01 |
| MSMEG_2433 | D-alanyl-D-alanine carboxypeptidase              | NA   | 0.907 | 1.68E-01 |
| MSMEG_2434 | conserved hypothetical protein                   | NA   | 0.977 | 5.97E-01 |
| MSMEG_2435 | 30S ribosomal protein S16                        | NA   | 0.937 | 4.46E-01 |
| MSMEG_2436 | conserved hypothetical protein                   | NA   | 0.928 | 1.23E-01 |
| MSMEG_2437 | 16S rRNA processing protein RimM                 | rimM | 0.976 | 7.87E-01 |
| MSMEG_2438 | tRNA (guanine-N1)-methyltransferase              | trmD | 0.904 | 2.10E-01 |
| MSMEG_2439 | LppW protein                                     | NA   | 1.025 | 7.99E-01 |
| MSMEG_2440 | ribosomal protein L19                            | rplS | 1.038 | 8.04E-01 |
| MSMEG_2441 | signal peptidase I                               | lepB | 1.010 | 8.48E-01 |
| MSMEG_2442 | ribonuclease HII                                 | NA   | 1.007 | 9.34E-01 |
| MSMEG_2443 | conserved hypothetical protein                   | NA   | 0.956 | 6.15E-01 |

|            |                                                                                          |      |       |          |
|------------|------------------------------------------------------------------------------------------|------|-------|----------|
| MSMEG_2444 | dienelactone hydrolase family protein                                                    | NA   | 1.018 | 8.31E-02 |
| MSMEG_2445 | conserved hypothetical protein                                                           | NA   | 0.945 | 6.10E-01 |
| MSMEG_2446 | conserved hypothetical protein                                                           | NA   | 1.124 | 2.14E-01 |
| MSMEG_2447 | regulatory protein                                                                       | NA   | 1.310 | 7.34E-02 |
| MSMEG_2448 | hypothetical protein                                                                     | NA   | 1.570 | 6.03E-03 |
| MSMEG_2449 | methylmalonate-semialdehyde dehydrogenase                                                | mmsA | 1.213 | 1.80E-01 |
| MSMEG_2450 | adenosylmethionine--8-amino-7-oxononanoate transaminase                                  | NA   | 1.189 | 1.42E-01 |
| MSMEG_2451 | HAD-superfamily protein hydrolase, subfamily protein IIA                                 | NA   | 2.742 | 3.22E-01 |
| MSMEG_2452 | hypothetical protein                                                                     | NA   | 1.137 | 2.06E-01 |
| MSMEG_2453 | transcriptional regulator, GntR family protein                                           | NA   | 1.161 | 7.50E-02 |
| MSMEG_2454 | translation initiation inhibitor                                                         | NA   | 1.189 | 1.21E-02 |
| MSMEG_2455 | carbon monoxide dehydrogenase subunit G (CoxG) superfamily protein                       | NA   | 0.974 | 9.05E-01 |
| MSMEG_2456 | 5,10-methylenetetrahydromethanopterin reductase                                          | NA   | 0.964 | 5.32E-01 |
| MSMEG_2457 | hypothetical protein                                                                     | NA   | 1.043 | 7.51E-01 |
| MSMEG_2458 | hypothetical protein                                                                     | NA   | 0.894 | 6.57E-02 |
| MSMEG_2459 | transporter ATPase                                                                       | NA   | 0.785 | 3.56E-02 |
| MSMEG_2460 | transporter permease 1                                                                   | NA   | 0.797 | 1.83E-01 |
| MSMEG_2461 | transporter permease 2, putative                                                         | NA   | 0.802 | 1.20E-01 |
| MSMEG_2462 | carbon-monoxide dehydrogenase                                                            | NA   | 0.885 | 4.53E-01 |
| MSMEG_2463 | nicotine dehydrogenase chain A                                                           | NA   | 0.924 | 4.34E-01 |
| MSMEG_2464 | [2Fe-2S] binding domain protein                                                          | NA   | 1.131 | 6.77E-01 |
| MSMEG_2465 | adenine deaminase                                                                        | NA   | 0.750 | 1.91E-01 |
| MSMEG_2466 | glutaryl-CoA dehydrogenase                                                               | NA   | 0.922 | 5.03E-02 |
| MSMEG_2467 | transketolase, central region                                                            | NA   | 1.023 | 9.07E-01 |
| MSMEG_2468 | L-carnitine dehydratase/bile acid-inducible protein F                                    | NA   | 0.842 | 5.07E-02 |
| MSMEG_2469 | AMP-dependent synthetase and ligase                                                      | NA   | 0.951 | 3.47E-02 |
| MSMEG_2470 | acyl-CoA thioesterase                                                                    | NA   | 1.127 | 3.89E-01 |
| MSMEG_2471 | pyruvate dehydrogenase alpha subunit                                                     | NA   | 1.265 | 4.36E-01 |
| MSMEG_2472 | AsnC-family protein transcriptional regulator                                            | NA   | 1.366 | 1.41E-01 |
| MSMEG_2473 | sugar transporter; this gene contains a frame shift which is not the result of sequencin | NA   | 1.060 | 6.65E-01 |
| MSMEG_2473 | sugar transporter; this gene contains a frame shift which is not the result of sequencin | NA   | 1.238 | 6.39E-02 |

|            |                                                                                    |    |       |          |
|------------|------------------------------------------------------------------------------------|----|-------|----------|
| MSMEG_2474 | probable cutinase Cut3                                                             | NA | 0.982 | 4.55E-01 |
| MSMEG_2475 | putative oxidoreductase YdbC                                                       | NA | 1.043 | 3.07E-01 |
| MSMEG_2476 | MarR family protein transcriptional regulatory protein                             | NA | 0.951 | 7.50E-02 |
| MSMEG_2477 | cyclopentanol dehydrogenase                                                        | NA | 1.163 | 5.80E-02 |
| MSMEG_2478 | fumarylacetoacetate hydrolase family protein                                       | NA | 1.023 | 8.32E-01 |
| MSMEG_2479 | hypothetical protein                                                               | NA | 1.154 | 4.67E-01 |
| MSMEG_2480 | transcriptional regulator, GntR family protein, putative                           | NA | 1.698 | 1.13E-01 |
| MSMEG_2481 | conserved hypothetical protein                                                     | NA | 1.591 | 2.68E-01 |
| MSMEG_2482 | hypothetical protein                                                               | NA | 1.493 | 3.02E-01 |
| MSMEG_2483 | transcriptional regulator, lclR family protein                                     | NA | 1.245 | 2.63E-01 |
| MSMEG_2484 | conserved hypothetical protein                                                     | NA | 0.976 | 5.32E-01 |
| MSMEG_2485 | monooxygenase, FAD-binding                                                         | NA | 1.015 | 8.24E-01 |
| MSMEG_2486 | major facilitator superfamily protein                                              | NA | 1.018 | 7.99E-01 |
| MSMEG_2487 | 4-aminobutyrate aminotransferase                                                   | NA | 1.229 | 4.76E-01 |
| MSMEG_2488 | [NADP+] succinate-semialdehyde dehydrogenase                                       | NA | 1.367 | 1.24E-01 |
| MSMEG_2489 | transcriptional regulator, GntR family protein, putative                           | NA | 1.148 | 1.17E-01 |
| MSMEG_2490 | decarboxylase                                                                      | NA | 1.096 | 2.61E-01 |
| MSMEG_2491 | acetylornithine deacetylase                                                        | NA | 1.154 | 6.29E-01 |
| MSMEG_2492 | D-lactate dehydrogenase                                                            | NA | 1.290 | 1.39E-01 |
| MSMEG_2493 | aminotransferase, class I and II family protein                                    | NA | 1.237 | 1.04E-01 |
| MSMEG_2494 | Xaa-Pro aminopeptidase                                                             | NA | 0.985 | 7.83E-01 |
| MSMEG_2495 | decarboxylase                                                                      | NA | 1.076 | 5.58E-01 |
| MSMEG_2496 | NAD-binding protein                                                                | NA | 1.090 | 1.15E-01 |
| MSMEG_2497 | amidase family protein                                                             | NA | 0.950 | 7.04E-01 |
| MSMEG_2498 | conserved hypothetical protein                                                     | NA | 0.817 | 9.69E-02 |
| MSMEG_2499 | ABC transporter, membrane spanning protein, putative                               | NA | 1.259 | 4.24E-01 |
| MSMEG_2500 | conserved hypothetical protein                                                     | NA | 0.963 | 7.14E-01 |
| MSMEG_2501 | ABC nitrate/sulfonate/bicarbonate family protein transporter, inner membrane subun | NA | 0.716 | 7.07E-04 |
| MSMEG_2502 | transporter ATPase                                                                 | NA | 1.135 | 7.58E-01 |
| MSMEG_2503 | hypothetical protein                                                               | NA | 0.721 | 2.48E-02 |
| MSMEG_2504 | 3-isopropylmalate dehydratase small subunit                                        | NA | 1.402 | 6.05E-01 |

|            |                                                                                          |      |       |          |
|------------|------------------------------------------------------------------------------------------|------|-------|----------|
| MSMEG_2505 | 3-isopropylmalate dehydratase large subunit                                              | NA   | 0.914 | 6.73E-01 |
| MSMEG_2506 | carboxyvinyl-carboxyphosphonate phosphorylmutase                                         | NA   | 0.707 | 1.15E-02 |
| MSMEG_2507 | IclR-family protein transcriptional regulator                                            | NA   | 0.837 | 3.20E-01 |
| MSMEG_2508 | conserved hypothetical protein                                                           | NA   | 0.891 | 1.75E-01 |
| MSMEG_2509 | Mg-chelatase subunits D/I family protein, ComM subfamily protein                         | NA   | 1.070 | 6.76E-01 |
| MSMEG_2510 | smf family protein; this gene contains a frame shift which is not the result of sequenci | NA   | 0.875 | 2.67E-01 |
| MSMEG_2510 | smf family protein; this gene contains a frame shift which is not the result of sequenci | NA   | 1.175 | 3.69E-01 |
| MSMEG_2511 | siderophore utilization protein                                                          | NA   | 0.852 | 1.42E-01 |
| MSMEG_2512 | lactate 2-monooxygenase                                                                  | NA   | 0.959 | 5.90E-01 |
| MSMEG_2513 | hypothetical protein                                                                     | NA   | 0.971 | 7.44E-01 |
| MSMEG_2514 | conserved hypothetical protein; this gene contains a frame shift which is not the result | NA   | 0.773 | 1.77E-01 |
| MSMEG_2514 | conserved hypothetical protein; this gene contains a frame shift which is not the result | NA   | 1.161 | 4.63E-01 |
| MSMEG_2515 | tyrosine recombinase XerC                                                                | xerC | 0.893 | 1.81E-01 |
| MSMEG_2516 | putative oxidoreductase                                                                  | NA   | 0.924 | 1.04E-01 |
| MSMEG_2517 | hydrolase, alpha/beta fold family protein, putative                                      | NA   | 0.967 | 7.32E-01 |
| MSMEG_2518 | peptidase M23B                                                                           | NA   | 0.847 | 1.23E-01 |
| MSMEG_2519 | ribosomal protein S2                                                                     | rpsB | 1.126 | 1.24E-02 |
| MSMEG_2520 | translation elongation factor Ts                                                         | tsf  | 1.011 | 7.86E-01 |
| MSMEG_2521 | amidase                                                                                  | NA   | 1.340 | 3.96E-02 |
| MSMEG_2522 | efflux ABC transporter, permease protein                                                 | NA   | 1.061 | 7.27E-01 |
| MSMEG_2523 | efflux ABC transporter, permease protein, putative                                       | NA   | 1.258 | 4.83E-01 |
| MSMEG_2524 | ABC transporter, ATP-binding protein                                                     | NA   | 1.439 | 3.33E-01 |
| MSMEG_2525 | amino acid permease superfamily protein                                                  | NA   | 0.881 | 2.24E-01 |
| MSMEG_2526 | copper methylamine oxidase                                                               | NA   | 1.102 | 6.23E-01 |
| MSMEG_2527 | hypothetical protein                                                                     | NA   | 1.589 | 2.69E-02 |
| MSMEG_2528 | glycerate kinase                                                                         | NA   | 0.876 | 3.18E-02 |
| MSMEG_2529 | glyoxylate reductase                                                                     | NA   | 0.868 | 3.12E-02 |
| MSMEG_2530 | 4-carboxymuconolactone decarboxylase domain protein                                      | pcaC | 0.988 | 7.25E-01 |
| MSMEG_2531 | GntR family protein transcriptional regulator                                            | NA   | 0.907 | 4.82E-01 |
| MSMEG_2532 | dehydroquinase dehydratase, type II                                                      | aroQ | 0.910 | 2.98E-01 |
| MSMEG_2533 | hypothetical protein                                                                     | NA   | 0.629 | 5.35E-03 |



|            |                                                           |      |       |          |
|------------|-----------------------------------------------------------|------|-------|----------|
| MSMEG_2534 | putative carboxylesterase protein                         | NA   | 0.758 | 1.38E-01 |
| MSMEG_2535 | dehydrogenase/reductase SDR family protein member 10      | NA   | 1.019 | 8.36E-01 |
| MSMEG_2536 | 3-oxoacyl-[acyl-carrier-protein] reductase                | NA   | 0.794 | 2.56E-01 |
| MSMEG_2537 | transporter protein                                       | NA   | 0.665 | 4.74E-03 |
| MSMEG_2538 | MarR-family protein transcriptional regulator             | NA   | 0.880 | 1.79E-01 |
| MSMEG_2539 | thiopurine S-methyltransferase (tpmt) superfamily protein | NA   | 0.851 | 2.36E-01 |
| MSMEG_2540 | uridylate kinase                                          | pyrH | 0.769 | 7.63E-04 |
| MSMEG_2541 | ribosome recycling factor                                 | frr  | 0.835 | 2.69E-03 |
| MSMEG_2542 | integral membrane protein DUF6                            | NA   | 2.060 | 1.34E-02 |
| MSMEG_2543 | phosphatidate cytidyltransferase                          | cdsA | 0.980 | 8.55E-01 |
| MSMEG_2544 | transcriptional regulator, LysR family protein            | NA   | 1.199 | 1.30E-01 |
| MSMEG_2545 | radical SAM enzyme, Cfr family protein                    | NA   | 1.088 | 2.57E-01 |
| MSMEG_2546 | transcriptional Regulator, GntR family protein            | NA   | 1.009 | 9.40E-01 |
| MSMEG_2547 | transcriptional regulator                                 | NA   | 1.081 | 1.03E-01 |
| MSMEG_2548 | 3-oxoacyl-[acyl-carrier-protein] reductase                | NA   | 0.957 | 6.72E-01 |
| MSMEG_2549 | major facilitator superfamily protein                     | NA   | 1.308 | 3.09E-01 |
| MSMEG_2550 | glyoxylate reductase                                      | NA   | 1.351 | 4.71E-01 |
| MSMEG_2551 | hypothetical protein                                      | NA   | 0.785 | 1.80E-01 |
| MSMEG_2552 | aldehyde dehydrogenase (NAD) family protein               | NA   | 0.833 | 1.63E-01 |
| MSMEG_2553 | transcriptional regulator, TetR family protein            | NA   | 0.871 | 3.30E-02 |
| MSMEG_2554 | phosphotransferase enzyme family protein                  | NA   | 1.132 | 3.22E-02 |
| MSMEG_2555 | hypothetical protein                                      | NA   | 0.909 | 5.26E-01 |
| MSMEG_2556 | beta-glucosidase                                          | NA   | 0.957 | 5.41E-01 |
| MSMEG_2557 | transcriptional regulator, TetR family protein            | NA   | 1.111 | 3.37E-01 |
| MSMEG_2558 | NikQ protein                                              | NA   | 1.317 | 2.07E-01 |
| MSMEG_2559 | conserved domain protein                                  | NA   | 0.954 | 4.44E-01 |
| MSMEG_2560 | conserved hypothetical protein                            | NA   | 1.011 | 8.61E-01 |
| MSMEG_2561 | gluconolactonase                                          | NA   | 1.043 | 7.06E-01 |
| MSMEG_2562 | conserved hypothetical protein                            | NA   | 1.528 | 1.56E-01 |
| MSMEG_2563 | cytochrome P450 superfamily protein                       | NA   | 1.264 | 3.24E-01 |
| MSMEG_2564 | oxidoreductase, zinc-binding dehydrogenase family protein | NA   | 1.089 | 7.75E-01 |

|            |                                                      |      |       |          |
|------------|------------------------------------------------------|------|-------|----------|
| MSMEG_2565 | 4-hydroxy-2-oxovalerate aldolase                     | NA   | 0.934 | 7.02E-01 |
| MSMEG_2566 | 3-alpha-(or 20-beta)-hydroxysteroid dehydrogenase    | NA   | 0.837 | 1.77E-01 |
| MSMEG_2567 | probable monooxygenase                               | NA   | 1.096 | 6.25E-01 |
| MSMEG_2568 | LipW protein                                         | NA   | 0.899 | 5.13E-01 |
| MSMEG_2569 | oxidoreductase, 2OG-Fe(II) oxygenase family protein  | NA   | 0.824 | 4.44E-02 |
| MSMEG_2570 | xanthine/uracil permease                             | NA   | 1.083 | 3.23E-01 |
| MSMEG_2571 | cupin 2, conserved barrel                            | NA   | 0.837 | 2.96E-03 |
| MSMEG_2572 | conserved hypothetical protein                       | NA   | 0.857 | 7.99E-02 |
| MSMEG_2573 | conserved hypothetical protein                       | NA   | 0.939 | 4.67E-01 |
| MSMEG_2574 | conserved hypothetical protein                       | NA   | 1.014 | 8.78E-01 |
| MSMEG_2575 | conserved hypothetical protein                       | NA   | 0.997 | 9.56E-01 |
| MSMEG_2576 | deoxyribodipyrimidine photo-lyase                    | NA   | 1.048 | 5.72E-01 |
| MSMEG_2577 | hypothetical protein                                 | NA   | 1.199 | 2.63E-01 |
| MSMEG_2578 | 1-deoxy-D-xylulose 5-phosphate reductoisomerase      | dxr  | 0.911 | 9.93E-02 |
| MSMEG_2579 | zinc metalloprotease                                 | NA   | 0.862 | 6.19E-02 |
| MSMEG_2580 | 4-hydroxy-3-methylbut-2-en-1-yl diphosphate synthase | ispG | 1.000 | 9.89E-01 |
| MSMEG_2581 | acetyltransferase                                    | NA   | 1.124 | 3.85E-01 |
| MSMEG_2582 | conserved hypothetical protein                       | NA   | 1.000 | 9.82E-01 |
| MSMEG_2583 | putative transcriptional regulator                   | NA   | 1.218 | 3.12E-02 |
| MSMEG_2584 | penicillin-binding protein, putative                 | NA   | 0.851 | 4.30E-03 |
| MSMEG_2585 | conserved hypothetical protein                       | NA   | 1.087 | 7.49E-02 |
| MSMEG_2586 | conserved hypothetical protein, putative             | NA   | 1.434 | 6.81E-02 |
| MSMEG_2587 | methionine aminopeptidase, type I                    | map  | 1.206 | 3.98E-02 |
| MSMEG_2588 | cobyric acid synthase CobQ                           | cobQ | 1.306 | 9.44E-03 |
| MSMEG_2589 | conserved hypothetical protein                       | NA   | 1.010 | 8.72E-01 |
| MSMEG_2590 | AraC-family protein transcriptional regulator        | NA   | 1.260 | 2.16E-01 |
| MSMEG_2591 | hypothetical protein                                 | NA   | 1.232 | 2.11E-01 |
| MSMEG_2592 | conserved hypothetical protein                       | NA   | 0.980 | 7.49E-01 |
| MSMEG_2593 | gnat-family protein acetyltransferase                | NA   | 0.955 | 4.91E-01 |
| MSMEG_2594 | asparagine synthase (glutamine-hydrolyzing)          | asnB | 0.888 | 2.34E-01 |
| MSMEG_2595 | gamma-glutamylisopropylamide synthetase              | NA   | 0.912 | 3.02E-01 |

|            |                                                                          |      |       |          |
|------------|--------------------------------------------------------------------------|------|-------|----------|
| MSMEG_2596 | peptidase C26                                                            | NA   | 0.963 | 3.30E-01 |
| MSMEG_2597 | aldehyde dehydrogenase                                                   | NA   | 0.914 | 2.36E-01 |
| MSMEG_2598 | short chain dehydrogenase                                                | NA   | 1.159 | 4.23E-01 |
| MSMEG_2599 | GntR-family protein transcriptional regulator                            | NA   | 1.006 | 9.39E-01 |
| MSMEG_2600 | regulatory protein                                                       | NA   | 0.929 | 2.87E-02 |
| MSMEG_2601 | protocatechuate 3,4-dioxygenase, beta subunit                            | pcaH | 0.837 | 2.89E-01 |
| MSMEG_2602 | protocatechuate 3,4-dioxygenase, alpha subunit                           | pcaG | 0.825 | 2.71E-01 |
| MSMEG_2603 | 3-carboxy-cis,cis-muconate cycloisomerase                                | pcaB | 0.662 | 2.98E-02 |
| MSMEG_2604 | 4-carboxymuconolactone decarboxylase                                     | pcaC | 1.606 | 4.05E-01 |
| MSMEG_2605 | transcriptional regulator, GntR family protein                           | NA   | 1.142 | 1.50E-01 |
| MSMEG_2606 | ArsR-family protein transcriptional regulator                            | NA   | 1.146 | 3.43E-01 |
| MSMEG_2607 | cobalamin biosynthesis protein CbiM                                      | cbiM | 0.914 | 3.21E-02 |
| MSMEG_2608 | cobalt transport protein CbiM                                            | NA   | 0.929 | 7.68E-02 |
| MSMEG_2609 | cobalt ABC transporter, permease protein CbiQ                            | cbiQ | 1.059 | 2.26E-01 |
| MSMEG_2610 | cobalt transport protein ATP-binding subunit                             | NA   | 1.076 | 3.17E-01 |
| MSMEG_2611 | pyridine nucleotide-disulphide oxidoreductase family protein             | NA   | 0.810 | 5.21E-02 |
| MSMEG_2612 | conserved hypothetical protein                                           | NA   | 0.848 | 5.80E-03 |
| MSMEG_2613 | malate:quinone-oxidoreductase                                            | mqo  | 1.218 | 1.15E-02 |
| MSMEG_2614 | ElaA protein                                                             | NA   | 1.288 | 2.84E-04 |
| MSMEG_2615 | chelataase                                                               | NA   | 1.016 | 5.48E-01 |
| MSMEG_2616 | cob(I)alamin adenosyltransferase                                         | cobO | 0.708 | 7.73E-03 |
| MSMEG_2617 | cobyrinic Acid a,c-diamide synthase                                      | cobB | 0.735 | 3.96E-03 |
| MSMEG_2618 | uroporphyrin-III C-methyltransferase                                     | cobA | 1.126 | 1.09E-01 |
| MSMEG_2619 | efflux protein                                                           | NA   | 1.186 | 2.04E-01 |
| MSMEG_2620 | hypothetical protein                                                     | NA   | 1.181 | 3.01E-01 |
| MSMEG_2621 | prolyl-tRNA synthetase                                                   | proS | 1.128 | 2.58E-01 |
| MSMEG_2622 | conserved hypothetical alanine rich protein                              | NA   | 1.225 | 1.98E-01 |
| MSMEG_2623 | Tat (twin-arginine translocation) pathway signal sequence domain protein | NA   | 1.129 | 8.06E-02 |
| MSMEG_2624 | conserved hypothetical protein                                           | NA   | 1.012 | 6.74E-01 |
| MSMEG_2625 | transcription termination factor NusA                                    | nusA | 1.040 | 4.33E-01 |
| MSMEG_2626 | conserved hypothetical protein                                           | NA   | 0.895 | 1.00E-01 |

|            |                                                                                 |      |       |          |
|------------|---------------------------------------------------------------------------------|------|-------|----------|
| MSMEG_2627 | hypothetical protein                                                            | NA   | 1.196 | 3.40E-01 |
| MSMEG_2628 | translation initiation factor IF-2                                              | infB | 1.047 | 7.74E-01 |
| MSMEG_2629 | ribosome-binding factor A                                                       | rbfA | 1.287 | 8.73E-02 |
| MSMEG_2630 | DHH family protein                                                              | NA   | 1.262 | 1.28E-01 |
| MSMEG_2631 | MATE efflux family protein                                                      | NA   | 1.427 | 3.33E-01 |
| MSMEG_2632 | SAM-dependent methyltransferase                                                 | NA   | 0.913 | 7.66E-02 |
| MSMEG_2633 | ABC transporter ATP-binding protein                                             | NA   | 1.368 | 3.91E-01 |
| MSMEG_2634 | conserved hypothetical protein                                                  | NA   | 0.657 | 1.62E-01 |
| MSMEG_2635 | ABC transporter permease protein                                                | NA   | 1.386 | 2.00E-01 |
| MSMEG_2636 | regulatory protein, LacI                                                        | NA   | 1.260 | 4.76E-01 |
| MSMEG_2637 | oxidoreductase, Gfo/Idh/MocA family protein                                     | NA   | 0.928 | 6.60E-01 |
| MSMEG_2638 | conserved hypothetical protein                                                  | NA   | 0.995 | 9.59E-01 |
| MSMEG_2639 | integral membrane protein                                                       | NA   | 1.456 | 7.68E-02 |
| MSMEG_2640 | 3-dehydroshikimate dehydratase                                                  | NA   | 0.915 | 7.25E-01 |
| MSMEG_2641 | enoyl-CoA hydratase                                                             | NA   | 1.035 | 5.20E-01 |
| MSMEG_2642 | conserved hypothetical protein                                                  | NA   | 0.883 | 4.66E-02 |
| MSMEG_2643 | conserved hypothetical protein                                                  | NA   | 0.944 | 4.04E-01 |
| MSMEG_2644 | putative hydrolase                                                              | NA   | 0.938 | 3.96E-01 |
| MSMEG_2645 | conserved hypothetical protein                                                  | NA   | 0.904 | 2.54E-02 |
| MSMEG_2647 | metallophosphoesterase                                                          | NA   | 0.843 | 9.70E-02 |
| MSMEG_2648 | Sfp-type phosphopantetheinyl transferase                                        | NA   | 0.917 | 2.10E-01 |
| MSMEG_2649 | tRNA pseudouridine synthase B                                                   | truB | 0.970 | 6.91E-01 |
| MSMEG_2650 | acyl-CoA dehydrogenase                                                          | NA   | 1.106 | 6.49E-01 |
| MSMEG_2651 | alkanesulfonate monooxygenase family protein                                    | NA   | 1.086 | 5.67E-01 |
| MSMEG_2652 | iron repressor protein                                                          | NA   | 1.228 | 4.47E-03 |
| MSMEG_2653 | riboflavin biosynthesis protein RibF                                            | ribF | 0.989 | 2.97E-01 |
| MSMEG_2654 | ribosomal protein S15                                                           | rpsO | 1.218 | 3.65E-01 |
| MSMEG_2655 | LppU protein                                                                    | NA   | 1.292 | 7.27E-03 |
| MSMEG_2656 | guanosine pentaphosphate synthetase I/polyribonucleotide nucleotidyltransferase | gpsI | 1.161 | 2.24E-01 |
| MSMEG_2657 | peptidase, M16 family protein                                                   | NA   | 1.284 | 8.91E-02 |
| MSMEG_2658 | beta-lactamase                                                                  | NA   | 1.154 | 2.50E-01 |

|            |                                                                                             |      |       |          |
|------------|---------------------------------------------------------------------------------------------|------|-------|----------|
| MSMEG_2659 | alanine dehydrogenase                                                                       | ald  | 1.012 | 9.33E-01 |
| MSMEG_2660 | transcriptional regulator, AsnC family protein                                              | NA   | 1.184 | 4.69E-02 |
| MSMEG_2661 | domain of unknown function (306) family protein                                             | NA   | 0.978 | 8.43E-01 |
| MSMEG_2662 | hypothetical protein                                                                        | NA   | 1.167 | 5.17E-01 |
| MSMEG_2663 | conserved hypothetical protein                                                              | NA   | 0.833 | 5.19E-01 |
| MSMEG_2664 | dihydrodipicolinate reductase                                                               | dapB | 1.037 | 4.42E-01 |
| MSMEG_2665 | conserved hypothetical protein                                                              | NA   | 1.058 | 5.22E-01 |
| MSMEG_2666 | multimeric flavodoxin WrbA                                                                  | NA   | 0.992 | 8.71E-01 |
| MSMEG_2667 | HpcH/HpaI aldolase/citrate lyase family protein, putative                                   | NA   | 1.051 | 4.36E-01 |
| MSMEG_2668 | conserved hypothetical protein                                                              | NA   | 1.038 | 6.52E-01 |
| MSMEG_2669 | hydrolase                                                                                   | NA   | 0.793 | 9.91E-05 |
| MSMEG_2670 | thymidylate synthase                                                                        | thyA | 0.918 | 2.32E-01 |
| MSMEG_2671 | dihydrofolate reductase                                                                     | folA | 1.002 | 9.62E-01 |
| MSMEG_2672 | acyl-CoA synthase                                                                           | NA   | 1.299 | 2.55E-01 |
| MSMEG_2673 | similar at the nucleotide level to IS1137 in the IS Finder database. This gene is disrupted | NA   | 1.039 | 8.53E-01 |
| MSMEG_2674 | similar at the nucleotide level to IS1137 in the IS Finder database. This gene is disrupted | NA   | 1.295 | 2.68E-01 |
| MSMEG_2675 | ISMsm8, transposase                                                                         | NA   | 0.954 | 7.45E-01 |
| MSMEG_2676 | IS1137, transposase orfA                                                                    | NA   | 1.043 | 7.97E-01 |
| MSMEG_2676 | IS1137, transposase orfA                                                                    | NA   | 1.182 | 3.40E-01 |
| MSMEG_2677 | conserved large membrane protein                                                            | NA   | 1.099 | 7.17E-01 |
| MSMEG_2678 | hypothetical protein                                                                        | NA   | 1.438 | 4.59E-01 |
| MSMEG_2679 | conserved hypothetical protein                                                              | NA   | 0.974 | 7.81E-01 |
| MSMEG_2680 | amino acid transporter                                                                      | NA   | 1.187 | 1.29E-01 |
| MSMEG_2681 | proline imino-peptidase                                                                     | NA   | 1.183 | 6.84E-02 |
| MSMEG_2682 | transcriptional regulator                                                                   | NA   | 1.125 | 2.61E-02 |
| MSMEG_2683 | thymidylate synthase, flavin-dependent                                                      | thyX | 1.181 | 1.07E-01 |
| MSMEG_2684 | dihydrodipicolinate synthase                                                                | dapA | 1.132 | 4.02E-03 |
| MSMEG_2685 | metallo-beta-lactamase superfamily protein                                                  | NA   | 1.139 | 2.16E-01 |
| MSMEG_2686 | conserved hypothetical protein                                                              | NA   | 1.041 | 7.10E-01 |
| MSMEG_2687 | carveol dehydrogenase                                                                       | NA   | 0.962 | 6.43E-01 |
| MSMEG_2688 | antibiotic biosynthesis monooxygenase domain protein                                        | NA   | 0.834 | 1.37E-02 |

|            |                                                                                           |      |       |          |
|------------|-------------------------------------------------------------------------------------------|------|-------|----------|
| MSMEG_2689 | hypothetical protein                                                                      | NA   | 1.014 | 9.11E-01 |
| MSMEG_2690 | DNA translocase FtsK                                                                      | NA   | 1.499 | 6.61E-03 |
| MSMEG_2691 | acetyltransferase, gnat family protein                                                    | NA   | 1.381 | 5.85E-03 |
| MSMEG_2692 | CDP-diacylglycerol--glycerol-3-phosphate 3-phosphatidyltransferase                        | pgsA | 0.991 | 8.39E-01 |
| MSMEG_2693 | competence-damaged protein                                                                | NA   | 1.201 | 1.46E-01 |
| MSMEG_2694 | transcriptional regulator, XRE family protein                                             | NA   | 0.885 | 2.42E-01 |
| MSMEG_2695 | 35 kDa protein                                                                            | NA   | 0.834 | 3.97E-02 |
| MSMEG_2696 | putative conserved membrane alanine rich protein                                          | NA   | 0.972 | 3.17E-01 |
| MSMEG_2697 | conserved hypothetical protein                                                            | NA   | 0.975 | 6.15E-01 |
| MSMEG_2698 | conserved hypothetical protein                                                            | NA   | 0.974 | 7.11E-01 |
| MSMEG_2699 | conserved hypothetical protein                                                            | NA   | 0.994 | 8.98E-01 |
| MSMEG_2700 | conserved hypothetical protein                                                            | NA   | 1.029 | 8.48E-01 |
| MSMEG_2701 | hypothetical protein                                                                      | NA   | 0.917 | 2.65E-01 |
| MSMEG_2702 | hydrogenase expression/formation protein HypD                                             | hypD | 0.987 | 9.25E-01 |
| MSMEG_2703 | hydrogenase assembly chaperone HypC/HupF                                                  | hypC | 2.344 | 4.23E-01 |
| MSMEG_2704 | transposase; this gene contains a frame shift which is not the result of sequencing error | NA   | 1.101 | 4.22E-02 |
| MSMEG_2705 | hydrogenase expression/formation protein HypE                                             | hypE | 1.098 | 3.37E-01 |
| MSMEG_2706 | phosphoheptose isomerase                                                                  | gmhA | 0.977 | 7.73E-01 |
| MSMEG_2707 | hypothetical protein                                                                      | NA   | 1.024 | 3.41E-01 |
| MSMEG_2708 | hypothetical protein                                                                      | NA   | 1.117 | 5.70E-01 |
| MSMEG_2709 | hypothetical protein                                                                      | NA   | 0.967 | 7.98E-01 |
| MSMEG_2710 | hypothetical protein                                                                      | NA   | 0.696 | 5.69E-02 |
| MSMEG_2711 | [NiFe] hydrogenase maturation protein HypF                                                | hypF | 1.000 | 9.97E-01 |
| MSMEG_2712 | hydrogenase assembly chaperone HypC/HupF                                                  | hypC | 1.011 | 9.60E-01 |
| MSMEG_2713 | peptidase M52, hydrogen uptake protein                                                    | NA   | 1.341 | 5.08E-01 |
| MSMEG_2714 | hypothetical protein                                                                      | NA   | 1.612 | 9.12E-02 |
| MSMEG_2715 | conserved hypothetical protein                                                            | NA   | 1.042 | 7.98E-01 |
| MSMEG_2716 | conserved hypothetical protein                                                            | NA   | 1.129 | 6.15E-01 |
| MSMEG_2717 | conserved hypothetical protein                                                            | NA   | 2.536 | 2.69E-01 |
| MSMEG_2718 | iron-sulfur cluster-binding protein, Rieske family protein, putative                      | NA   | 0.926 | 2.73E-01 |
| MSMEG_2719 | hydrogen:quinone oxidoreductase                                                           | NA   | 0.974 | 8.66E-01 |

|            |                                                                                                               |      |       |          |
|------------|---------------------------------------------------------------------------------------------------------------|------|-------|----------|
| MSMEG_2720 | NADH ubiquinone oxidoreductase, 20 kda subunit                                                                | NA   | 0.728 | 1.47E-01 |
| MSMEG_2721 | hydrogenase accessory protein HypB                                                                            | hypB | 1.154 | 5.45E-01 |
| MSMEG_2722 | hydrogenase nickel insertion protein HypA                                                                     | hypA | 1.141 | 4.53E-01 |
| MSMEG_2723 | protein RecA                                                                                                  | recA | 0.847 | 4.03E-02 |
| MSMEG_2724 | regulatory protein RecX                                                                                       | NA   | 1.111 | 9.25E-03 |
| MSMEG_2725 | glutamate transporter permease protein GluD                                                                   | NA   | 0.859 | 5.67E-02 |
| MSMEG_2726 | glutamate permease                                                                                            | NA   | 0.856 | 8.03E-02 |
| MSMEG_2727 | glutamate binding protein                                                                                     | NA   | 0.801 | 6.69E-03 |
| MSMEG_2728 | glutamate transport ATP-binding protein GluA                                                                  | NA   | 1.125 | 6.20E-02 |
| MSMEG_2729 | tRNA-I(6)A37 thiotransferase enzyme MiaB                                                                      | miaB | 1.227 | 6.05E-03 |
| MSMEG_2730 | conserved hypothetical protein; this gene contains a frame shift which is not the result of sequencing error; | NA   | 1.083 | 3.47E-01 |
| MSMEG_2730 | conserved hypothetical protein; this gene contains a frame shift which is not the result of sequencing error; | NA   | 1.250 | 3.75E-02 |
| MSMEG_2731 | ATPase involved in DNA repair                                                                                 | NA   | 1.422 | 4.52E-02 |
| MSMEG_2732 | conserved hypothetical protein                                                                                | NA   | 1.365 | 3.81E-01 |
| MSMEG_2733 | conserved hypothetical protein                                                                                | NA   | 1.203 | 2.15E-01 |
| MSMEG_2734 | tRNA delta(2)-isopentenylpyrophosphate transferase                                                            | miaA | 1.271 | 1.88E-01 |
| MSMEG_2735 | diaminopimelate epimerase                                                                                     | dapF | 1.223 | 4.81E-02 |
| MSMEG_2736 | GTP-binding protein                                                                                           | NA   | 1.524 | 7.91E-02 |
| MSMEG_2737 | ppe family protein                                                                                            | NA   | 1.359 | 3.64E-01 |
| MSMEG_2738 | biotin sulfoxide reductase                                                                                    | NA   | 1.077 | 4.71E-01 |
| MSMEG_2739 | conserved hypothetical protein                                                                                | NA   | 0.861 | 3.86E-02 |
| MSMEG_2740 | LexA repressor                                                                                                | lexA | 1.045 | 3.79E-01 |
| MSMEG_2741 | hypothetical protein                                                                                          | NA   | 0.972 | 7.88E-01 |
| MSMEG_2742 | DNA-damage-inducible protein                                                                                  | NA   | 1.095 | 2.39E-01 |
| MSMEG_2743 | transcriptional regulator, NrdR family protein                                                                | nrdR | 1.027 | 6.46E-01 |
| MSMEG_2744 | thymidylate synthase                                                                                          | NA   | 0.942 | 3.66E-01 |
| MSMEG_2745 | hydrolase; this gene contains a frame shift which is not the result of sequencing error;                      | NA   | 1.233 | 1.34E-01 |
| MSMEG_2746 | conserved hypothetical alanine and leucine rich protein                                                       | NA   | 1.461 | 2.32E-02 |
| MSMEG_2747 | conserved hypothetical protein; this gene contains a frame shift which is not the result of sequencing error; | NA   | 1.029 | 7.33E-01 |
| MSMEG_2747 | conserved hypothetical protein; this gene contains a frame shift which is not the result of sequencing error; | NA   | 1.323 | 2.16E-01 |
| MSMEG_2748 | soluble pyridine nucleotide transhydrogenase                                                                  | sthA | 0.967 | 7.31E-01 |

|            |                                                                       |      |       |          |
|------------|-----------------------------------------------------------------------|------|-------|----------|
| MSMEG_2749 | conserved hypothetical protein                                        | NA   | 1.013 | 9.37E-01 |
| MSMEG_2750 | iron-dependent repressor IdeR                                         | NA   | 0.887 | 3.72E-02 |
| MSMEG_2751 | hypothetical protein                                                  | NA   | 0.910 | 1.11E-01 |
| MSMEG_2752 | sigma factor SigB                                                     | NA   | 0.814 | 2.58E-02 |
| MSMEG_2753 | conserved hypothetical protein                                        | NA   | 0.923 | 7.48E-02 |
| MSMEG_2754 | conserved hypothetical protein                                        | NA   | 1.049 | 8.06E-01 |
| MSMEG_2755 | conserved hypothetical protein                                        | NA   | 0.985 | 6.25E-01 |
| MSMEG_2756 | conserved hypothetical protein                                        | NA   | 1.166 | 1.79E-01 |
| MSMEG_2757 | glutathione S-transferase domain protein                              | NA   | 0.961 | 5.04E-01 |
| MSMEG_2758 | sigma factor MysA                                                     | NA   | 0.967 | 2.99E-01 |
| MSMEG_2759 | hypothetical protein                                                  | NA   | 1.367 | 5.89E-02 |
| MSMEG_2760 | polyphosphate glucokinase                                             | NA   | 0.862 | 1.24E-02 |
| MSMEG_2761 | putative secreted alanine rich protein                                | NA   | 1.118 | 3.54E-02 |
| MSMEG_2762 | inositol-1-monophosphatase                                            | NA   | 0.938 | 6.70E-01 |
| MSMEG_2763 | conserved hypothetical protein                                        | NA   | 1.041 | 7.47E-01 |
| MSMEG_2764 | probable conserved alanine rich transmembrane protein                 | NA   | 1.076 | 2.15E-01 |
| MSMEG_2765 | deoxyuridine 5'-triphosphate nucleotidohydrolase                      | NA   | 1.194 | 9.67E-03 |
| MSMEG_2766 | conserved hypothetical protein                                        | NA   | 1.148 | 8.17E-02 |
| MSMEG_2767 | conserved hypothetical protein                                        | NA   | 0.912 | 3.54E-01 |
| MSMEG_2768 | OB-fold nucleic acid binding domain protein                           | NA   | 0.943 | 7.25E-01 |
| MSMEG_2769 | TrkB protein                                                          | NA   | 0.945 | 3.70E-01 |
| MSMEG_2770 | probable conserved integral membrane alanine and leucine rich protein | NA   | 0.967 | 6.10E-01 |
| MSMEG_2771 | TrkA protein                                                          | NA   | 0.965 | 5.30E-01 |
| MSMEG_2772 | amino acid permease                                                   | NA   | 1.060 | 3.62E-01 |
| MSMEG_2773 | hypothetical RNA methyltransferase                                    | NA   | 1.283 | 1.65E-02 |
| MSMEG_2774 | diguanylate cyclase (ggdef) domain protein                            | NA   | 1.074 | 1.58E-01 |
| MSMEG_2775 | Na <sup>+</sup> /H <sup>+</sup> antiporter NhaA                       | nhaA | 0.968 | 6.03E-01 |
| MSMEG_2776 | 1-deoxy-D-xylulose-5-phosphate synthase                               | dxs  | 1.132 | 1.50E-01 |
| MSMEG_2777 | alpha/beta hydrolase fold                                             | NA   | 1.351 | 3.31E-02 |
| MSMEG_2778 | ribonuclease D                                                        | NA   | 0.864 | 3.70E-02 |
| MSMEG_2778 | ribonuclease D                                                        | NA   | 1.263 | 1.35E-01 |



|            |                                                  |      |       |          |
|------------|--------------------------------------------------|------|-------|----------|
| MSMEG_2779 | conserved hypothetical protein                   | NA   | 0.874 | 3.37E-03 |
| MSMEG_2780 | uroporphyrinogen decarboxylase                   | hemE | 1.052 | 2.46E-01 |
| MSMEG_2781 | protoporphyrinogen oxidase                       | hemG | 1.063 | 4.98E-01 |
| MSMEG_2782 | conserved hypothetical protein                   | NA   | 1.036 | 3.14E-01 |
| MSMEG_2783 | hypothetical protein                             | NA   | 1.111 | 7.44E-02 |
| MSMEG_2784 | methionine-R-sulfoxide reductase                 | msrB | 1.093 | 9.58E-02 |
| MSMEG_2785 | putative conserved integral membrane protein     | NA   | 1.101 | 1.08E-01 |
| MSMEG_2786 | hydrolase, alpha/beta fold family protein        | NA   | 1.253 | 7.04E-02 |
| MSMEG_2787 | putative riboflavin biosynthesis protein RibD    | NA   | 1.087 | 4.31E-01 |
| MSMEG_2788 | ATP/GTP-binding integral membrane protein        | NA   | 1.419 | 1.01E-02 |
| MSMEG_2789 | acetyltransferase, GNAT family protein           | NA   | 1.121 | 2.83E-01 |
| MSMEG_2790 | conserved hypothetical protein                   | NA   | 1.074 | 3.25E-01 |
| MSMEG_2791 | pyridoxamine 5'-phosphate oxidase family protein | NA   | 1.709 | 5.98E-03 |
| MSMEG_2792 | Clp amino terminal domain protein                | NA   | 0.842 | 2.07E-01 |
| MSMEG_2793 | sensor-type histidine kinase PrrB                | NA   | 1.199 | 2.76E-02 |
| MSMEG_2794 | transcriptional regulator, GntR family protein   | NA   | 1.429 | 3.04E-02 |
| MSMEG_2795 | transmembrane transport protein                  | NA   | 1.996 | 1.73E-02 |
| MSMEG_2796 | integral membrane protein                        | NA   | 0.935 | 2.06E-01 |
| MSMEG_2797 | LysR-family protein transcriptional regulator    | NA   | 0.781 | 1.99E-01 |
| MSMEG_2798 | hypothetical protein                             | NA   | 0.823 | 2.30E-01 |
| MSMEG_2799 | phospho-2-dehydro-3-deoxyheptonate aldolase      | NA   | 1.116 | 1.52E-01 |
| MSMEG_2800 | NADPH-dependent fmn reductase                    | NA   | 0.819 | 2.19E-02 |
| MSMEG_2801 | hypothetical protein                             | NA   | 1.158 | 5.62E-01 |
| MSMEG_2802 | hypothetical protein                             | NA   | 0.965 | 5.99E-01 |
| MSMEG_2802 | hypothetical protein                             | NA   | 1.158 | 1.67E-01 |
| MSMEG_2803 | hypothetical protein                             | NA   | 1.103 | 2.69E-01 |
| MSMEG_2804 | two-component system sensor kinase               | NA   | 0.871 | 4.15E-01 |
| MSMEG_2805 | ISMsm5, transposase                              | NA   | 0.876 | 9.93E-03 |
| MSMEG_2805 | ISMsm5, transposase                              | NA   | 0.970 | 7.08E-01 |
| MSMEG_2805 | ISMsm5, transposase                              | NA   | 1.070 | 4.89E-01 |
| MSMEG_2806 | two-component system response regulator          | NA   | 0.893 | 5.49E-03 |

|            |                                                                                          |    |       |          |
|------------|------------------------------------------------------------------------------------------|----|-------|----------|
| MSMEG_2807 | two-component system response regulator                                                  | NA | 1.004 | 9.59E-01 |
| MSMEG_2808 | short-chain dehydrogenase/reductase SDR                                                  | NA | 0.887 | 5.40E-01 |
| MSMEG_2809 | conserved hypothetical protein                                                           | NA | 0.890 | 5.88E-01 |
| MSMEG_2810 | major facilitator superfamily protein                                                    | NA | 2.876 | 4.16E-01 |
| MSMEG_2811 | hydride transferase 1                                                                    | NA | 0.949 | 6.52E-01 |
| MSMEG_2812 | C-5 sterol desaturase                                                                    | NA | 1.352 | 5.30E-01 |
| MSMEG_2813 | sensor kinase                                                                            | NA | 2.172 | 2.04E-01 |
| MSMEG_2814 | two component system response regulator; this gene contains a frame shift which is n     | NA | 5.616 | 3.92E-01 |
| MSMEG_2815 | putative tape-measure protein; this region contains one or more premature stops and      | NA | 0.943 | 7.27E-01 |
| MSMEG_2815 | putative tape-measure protein; this region contains one or more premature stops and      | NA | 1.523 | 1.86E-01 |
| MSMEG_2816 | conserved hypothetical protein; this gene contains a frame shift which is not the result | NA | 1.149 | 5.29E-01 |
| MSMEG_2817 | ABC efflux pump, fused inner membrane and ATPase subunits                                | NA | 0.763 | 1.20E-02 |
| MSMEG_2818 | ISMsm1, transposase orfB                                                                 | NA | 0.882 | 2.51E-01 |
| MSMEG_2818 | ISMsm1, transposase orfB                                                                 | NA | 1.077 | 3.07E-01 |
| MSMEG_2819 | ISMsm1, transposase orfA                                                                 | NA | 0.898 | 2.80E-01 |
| MSMEG_2819 | ISMsm1, transposase orfA                                                                 | NA | 1.198 | 1.87E-01 |
| MSMEG_2820 | hypothetical protein                                                                     | NA | 0.671 | 3.00E-03 |
| MSMEG_2822 | transposase, truncation                                                                  | NA | 0.756 | 2.66E-03 |
| MSMEG_2823 | This gene is disrupted by an IS1549 element.; IS1549, transposase, interruption-N; ideI  | NA | 0.880 | 4.52E-01 |
| MSMEG_2823 | This gene is disrupted by an IS1549 element.; IS1549, transposase, interruption-N; ideI  | NA | 0.905 | 5.71E-01 |
| MSMEG_2824 | IS1549, transposase                                                                      | NA | 0.862 | 2.28E-01 |
| MSMEG_2824 | IS1549, transposase                                                                      | NA | 0.947 | 6.46E-01 |
| MSMEG_2824 | IS1549, transposase                                                                      | NA | 1.036 | 7.70E-01 |
| MSMEG_2824 | IS1549, transposase                                                                      | NA | 1.253 | 2.70E-01 |
| MSMEG_2826 | hypothetical protein                                                                     | NA | 0.719 | 1.75E-02 |
| MSMEG_2827 | hypothetical protein                                                                     | NA | 1.301 | 2.15E-01 |
| MSMEG_2830 | ISMsm4, transposase                                                                      | NA | 1.080 | 6.37E-01 |
| MSMEG_2830 | ISMsm4, transposase                                                                      | NA | 1.502 | 1.51E-01 |
| MSMEG_2831 | hypothetical protein                                                                     | NA | 0.850 | 1.06E-01 |
| MSMEG_2832 | hypothetical protein                                                                     | NA | 1.097 | 2.91E-01 |
| MSMEG_2837 | nitrate reductase NarB                                                                   | NA | 0.996 | 8.97E-01 |

|            |                                                                  |      |       |          |
|------------|------------------------------------------------------------------|------|-------|----------|
| MSMEG_2838 | conserved hypothetical protein                                   | NA   | 1.004 | 9.74E-01 |
| MSMEG_2839 | transcriptional accessory protein                                | NA   | 1.031 | 1.93E-01 |
| MSMEG_2840 | conserved hypothetical protein                                   | NA   | 1.102 | 4.57E-01 |
| MSMEG_2841 | putative monooxygenase                                           | NA   | 0.994 | 9.70E-01 |
| MSMEG_2842 | nitrilotriacetate monooxygenase component A                      | ssuD | 0.984 | 8.03E-01 |
| MSMEG_2843 | nitrilotriacetate monooxygenase component A                      | ssuD | 0.924 | 1.61E-01 |
| MSMEG_2844 | ABC transporter, ATP-binding protein                             | NA   | 1.236 | 2.97E-01 |
| MSMEG_2845 | ABC transporter permease protein                                 | NA   | 1.139 | 4.59E-01 |
| MSMEG_2846 | ABC transporter permease protein                                 | NA   | 1.560 | 1.95E-01 |
| MSMEG_2847 | bacterial extracellular solute-binding protein, family protein 5 | NA   | 1.471 | 1.12E-01 |
| MSMEG_2848 | transmembrane efflux protein                                     | NA   | 0.973 | 7.52E-01 |
| MSMEG_2849 | transcriptional regulatory protein                               | NA   | 0.813 | 3.03E-02 |
| MSMEG_2850 | mycobacterial family protein 11 protein                          | NA   | 1.243 | 1.18E-01 |
| MSMEG_2851 | conserved hypothetical protein                                   | NA   | 2.746 | 3.43E-01 |
| MSMEG_2852 | 3-oxoacyl-[acyl-carrier-protein] reductase                       | NA   | 1.117 | 5.43E-01 |
| MSMEG_2853 | conserved hypothetical protein                                   | NA   | 1.054 | 8.27E-01 |
| MSMEG_2854 | conserved hypothetical protein                                   | NA   | 2.448 | 3.58E-01 |
| MSMEG_2855 | virulence factor Mce family protein                              | NA   | 0.977 | 8.34E-01 |
| MSMEG_2856 | virulence factor Mce family protein                              | NA   | 1.047 | 7.56E-01 |
| MSMEG_2857 | virulence factor Mce family protein                              | NA   | 1.340 | 3.58E-01 |
| MSMEG_2858 | virulence factor mce family protein                              | NA   | 0.972 | 8.43E-01 |
| MSMEG_2859 | virulence factor Mce family protein                              | NA   | 1.089 | 6.12E-01 |
| MSMEG_2860 | virulence factor mce family protein                              | NA   | 0.891 | 2.92E-01 |
| MSMEG_2861 | conserved hypothetical protein                                   | NA   | 0.991 | 9.11E-01 |
| MSMEG_2862 | conserved hypothetical protein                                   | NA   | 0.914 | 1.47E-01 |
| MSMEG_2863 | conserved hypothetical protein                                   | NA   | 0.997 | 9.65E-01 |
| MSMEG_2864 | conserved hypothetical protein                                   | NA   | 1.435 | 3.72E-01 |
| MSMEG_2865 | conserved hypothetical protein                                   | NA   | 1.244 | 3.41E-01 |
| MSMEG_2866 | thioesterase family protein                                      | NA   | 2.008 | 2.23E-01 |
| MSMEG_2867 | 3-ketosteroid dehydrogenase                                      | NA   | 1.050 | 7.39E-01 |
| MSMEG_2868 | transcriptional regulator, PadR family protein                   | NA   | 1.035 | 7.61E-01 |

|            |                                                                    |    |       |          |
|------------|--------------------------------------------------------------------|----|-------|----------|
| MSMEG_2869 | 3-ketosteroid-delta-1-dehydrogenase                                | NA | 0.887 | 1.71E-01 |
| MSMEG_2870 | oxygenase KshA                                                     | NA | 1.004 | 9.86E-01 |
| MSMEG_2871 | conserved hypothetical protein                                     | NA | 1.050 | 3.26E-01 |
| MSMEG_2872 | short-chain dehydrogenase/reductase SDR                            | NA | 1.174 | 1.82E-01 |
| MSMEG_2873 | 3-ketosteroid-delta4                                               | NA | 0.810 | 2.02E-01 |
| MSMEG_2874 | conserved hypothetical protein                                     | NA | 0.739 | 1.08E-01 |
| MSMEG_2875 | esterase                                                           | NA | 1.149 | 1.70E-01 |
| MSMEG_2876 | oxidoreductase, short chain dehydrogenase/reductase family protein | NA | 1.174 | 5.02E-01 |
| MSMEG_2877 | conserved hypothetical protein                                     | NA | 1.188 | 5.64E-01 |
| MSMEG_2878 | putative acyl-CoA dehydrogenase                                    | NA | 1.090 | 4.44E-01 |
| MSMEG_2879 | acyl-CoA dehydrogenase                                             | NA | 0.974 | 4.62E-01 |
| MSMEG_2880 | enoyl-CoA hydratase                                                | NA | 0.899 | 1.31E-01 |
| MSMEG_2881 | aldehyde dehydrogenase                                             | NA | 1.058 | 5.72E-01 |
| MSMEG_2882 | 5-exo-alcohol dehydrogenase                                        | NA | 0.949 | 6.40E-01 |
| MSMEG_2883 | feruloyl-CoA synthetase                                            | NA | 0.900 | 7.41E-02 |
| MSMEG_2884 | cyclohexanone monooxygenase                                        | NA | 1.271 | 4.10E-01 |
| MSMEG_2885 | short-chain dehydrogenase/reductase SDR                            | NA | 1.166 | 2.11E-01 |
| MSMEG_2886 | stress responsive A/B Barrel Domain family protein                 | NA | 2.066 | 3.94E-01 |
| MSMEG_2887 | conserved hypothetical protein                                     | NA | 1.606 | 2.77E-01 |
| MSMEG_2888 | lipase                                                             | NA | 2.129 | 3.54E-01 |
| MSMEG_2889 | NADH:flavin oxidoreductase/nadh oxidase                            | NA | 0.854 | 5.49E-01 |
| MSMEG_2890 | putative transcriptional regulator                                 | NA | 0.955 | 5.18E-01 |
| MSMEG_2891 | biphenyl-2,3-diol 1,2-dioxygenase 1                                | NA | 1.056 | 3.78E-01 |
| MSMEG_2892 | pigment production hydroxylase                                     | NA | 1.210 | 3.18E-01 |
| MSMEG_2893 | oxidoreductase, NAD/FAD-binding                                    | NA | 1.136 | 6.65E-01 |
| MSMEG_2894 | steroid monooxygenase                                              | NA | 0.975 | 8.64E-01 |
| MSMEG_2895 | short chain oxidoreductase                                         | NA | 0.919 | 3.27E-01 |
| MSMEG_2896 | conserved hypothetical protein                                     | NA | 1.300 | 1.29E-01 |
| MSMEG_2897 | conserved hypothetical protein                                     | NA | 1.000 | 9.98E-01 |
| MSMEG_2898 | transcriptional regulator, TetR family protein                     | NA | 1.137 | 2.81E-01 |
| MSMEG_2899 | oxidoreductase, short chain dehydrogenase/reductase family protein | NA | 1.197 | 2.09E-02 |

|            |                                                                                           |    |       |          |
|------------|-------------------------------------------------------------------------------------------|----|-------|----------|
| MSMEG_2900 | 2-hydroxy-6-oxo-6-phenylhexa-2,4-dienoate hydrolase                                       | NA | 0.789 | 7.44E-03 |
| MSMEG_2901 | conserved hypothetical protein                                                            | NA | 1.196 | 1.98E-01 |
| MSMEG_2902 | hydrolase, putative                                                                       | NA | 1.020 | 8.05E-01 |
| MSMEG_2903 | transposase; this gene contains a frame shift which is not the result of sequencing error | NA | 0.916 | 1.72E-01 |
| MSMEG_2903 | transposase; this gene contains a frame shift which is not the result of sequencing error | NA | 1.042 | 4.96E-01 |
| MSMEG_2903 | transposase; this gene contains a frame shift which is not the result of sequencing error | NA | 1.118 | 6.54E-02 |
| MSMEG_2904 | Mmcl protein                                                                              | NA | 0.988 | 9.02E-01 |
| MSMEG_2905 | transcriptional regulator                                                                 | NA | 1.240 | 2.97E-01 |
| MSMEG_2906 | conserved hypothetical protein                                                            | NA | 2.132 | 1.00E-01 |
| MSMEG_2907 | hypothetical oxidoreductase YeiQ                                                          | NA | 1.015 | 8.05E-01 |
| MSMEG_2908 | 2-Keto-3-deoxy-gluconate kinase                                                           | NA | 0.977 | 8.90E-01 |
| MSMEG_2909 | starvation-sensing protein RspA                                                           | NA | 1.080 | 6.64E-01 |
| MSMEG_2910 | transcriptional regulator, GntR family protein                                            | NA | 1.129 | 7.64E-02 |
| MSMEG_2911 | integral membrane transport protein                                                       | NA | 1.155 | 6.09E-01 |
| MSMEG_2912 | inner membrane metabolite transport protein YdfJ                                          | NA | 0.939 | 4.09E-01 |
| MSMEG_2913 | hydrolase                                                                                 | NA | 1.891 | 4.13E-01 |
| MSMEG_2914 | L-idonate 5-dehydrogenase                                                                 | NA | 0.958 | 6.89E-01 |
| MSMEG_2915 | sensor histidine kinase                                                                   | NA | 1.011 | 8.95E-01 |
| MSMEG_2916 | DNA-binding response regulator, PhoP family protein                                       | NA | 1.067 | 7.04E-01 |
| MSMEG_2917 | hypothetical protein                                                                      | NA | 0.951 | 5.05E-01 |
| MSMEG_2918 | short-chain dehydrogenase/reductase SDR                                                   | NA | 1.132 | 4.75E-01 |
| MSMEG_2919 | 2-dehydropantoate 2-reductase                                                             | NA | 1.014 | 8.92E-01 |
| MSMEG_2920 | aldo/keto reductase                                                                       | NA | 1.473 | 1.12E-01 |
| MSMEG_2921 | NADPH-flavin oxidoreductase                                                               | NA | 3.621 | 3.62E-01 |
| MSMEG_2922 | conserved hypothetical protein                                                            | NA | 1.097 | 7.71E-03 |
| MSMEG_2923 | dehydrogenase/reductase SDR family protein member 1                                       | NA | 1.079 | 4.74E-01 |
| MSMEG_2924 | permease binding-protein component                                                        | NA | 0.769 | 2.16E-01 |
| MSMEG_2925 | permease membrane component                                                               | NA | 1.565 | 4.73E-01 |
| MSMEG_2926 | glycine betaine/carnitine/choline transport ATP-binding protein opuCA                     | NA | 1.110 | 7.31E-01 |
| MSMEG_2927 | ABC transporter, permease protein OpuCB                                                   | NA | 1.204 | 6.13E-01 |
| MSMEG_2928 | conserved hypothetical protein                                                            | NA | 1.294 | 3.46E-02 |

|            |                                                                         |      |       |          |
|------------|-------------------------------------------------------------------------|------|-------|----------|
| MSMEG_2929 | thioesterase family protein                                             | NA   | 1.032 | 4.24E-01 |
| MSMEG_2930 | conserved hypothetical protein TIGR02611                                | NA   | 0.964 | 3.70E-01 |
| MSMEG_2931 | threonyl-tRNA synthetase                                                | thrS | 1.060 | 2.73E-01 |
| MSMEG_2932 | HIT family protein hydrolase                                            | NA   | 1.100 | 2.57E-01 |
| MSMEG_2933 | phosphatidylinositol synthase                                           | NA   | 1.131 | 5.79E-02 |
| MSMEG_2934 | lipid A biosynthesis lauroyl acyltransferase                            | NA   | 1.077 | 1.99E-01 |
| MSMEG_2935 | phosphatidylinositol alpha-mannosyltransferase                          | NA   | 1.172 | 7.09E-02 |
| MSMEG_2936 | hydrolase, nudix family protein                                         | NA   | 0.824 | 1.54E-02 |
| MSMEG_2937 | pyridoxine biosynthesis protein                                         | NA   | 1.252 | 1.45E-02 |
| MSMEG_2938 | acyl-CoA thioesterase II                                                | tesB | 1.241 | 4.63E-02 |
| MSMEG_2939 | glutamine amidotransferase subunit PdxT                                 | NA   | 1.167 | 2.33E-01 |
| MSMEG_2940 | conserved hypothetical protein                                          | NA   | 0.978 | 6.43E-01 |
| MSMEG_2941 | NAD dependent epimerase/dehydratase family protein                      | NA   | 1.202 | 1.49E-01 |
| MSMEG_2942 | glyoxalase/bleomycin resistance protein/dioxygenase superfamily protein | NA   | 1.053 | 3.60E-01 |
| MSMEG_2943 | crossover junction endodeoxyribonuclease RuvC                           | ruvC | 0.875 | 2.07E-02 |
| MSMEG_2944 | holliday junction DNA helicase RuvA                                     | ruvA | 0.857 | 1.81E-02 |
| MSMEG_2945 | holliday junction DNA helicase RuvB                                     | ruvB | 0.913 | 1.38E-01 |
| MSMEG_2946 | transmembrane protein                                                   | NA   | 1.075 | 1.85E-01 |
| MSMEG_2947 | polyketide cyclase                                                      | NA   | 0.778 | 5.04E-03 |
| MSMEG_2948 | 6-oxocamphor hydrolase                                                  | NA   | 0.843 | 2.24E-02 |
| MSMEG_2949 | carbon-monoxide dehydrogenase                                           | NA   | 0.859 | 3.55E-01 |
| MSMEG_2950 | carbon monoxide dehydrogenase, medium chain                             | NA   | 1.844 | 2.46E-01 |
| MSMEG_2951 | [2Fe-2S] binding domain protein                                         | NA   | 1.594 | 8.76E-02 |
| MSMEG_2952 | transport gene                                                          | NA   | 1.005 | 8.36E-01 |
| MSMEG_2953 | ethyl tert-butyl ether degradation EthD                                 | NA   | 0.812 | 9.95E-03 |
| MSMEG_2954 | LacI-family protein transcriptional regulator                           | NA   | 0.941 | 2.54E-01 |
| MSMEG_2955 | conserved hypothetical protein                                          | NA   | 1.029 | 7.52E-01 |
| MSMEG_2956 | NAD dependent epimerase/dehydratase family protein                      | NA   | 1.121 | 6.96E-01 |
| MSMEG_2957 | conserved hypothetical protein                                          | NA   | 1.353 | 3.89E-03 |
| MSMEG_2958 | conserved hypothetical protein                                          | NA   | 1.144 | 5.71E-01 |
| MSMEG_2959 | 4-aminobutyrate transaminase                                            | gabT | 1.192 | 3.63E-01 |

|            |                                                                                          |      |       |          |
|------------|------------------------------------------------------------------------------------------|------|-------|----------|
| MSMEG_2960 | preprotein translocase, YajC subunit                                                     | yajC | 0.898 | 5.79E-02 |
| MSMEG_2961 | protein-export membrane protein SecD                                                     | secD | 0.832 | 1.68E-02 |
| MSMEG_2962 | protein-export membrane protein SecF                                                     | NA   | 0.880 | 2.97E-01 |
| MSMEG_2963 | bacterial extracellular solute-binding protein, family protein 5                         | NA   | 0.762 | 2.43E-02 |
| MSMEG_2964 | adenine phosphoribosyltransferase                                                        | NA   | 0.761 | 6.95E-03 |
| MSMEG_2965 | GTP pyrophosphokinase                                                                    | relA | 1.303 | 5.30E-02 |
| MSMEG_2966 | major facilitator family protein transporter                                             | NA   | 1.087 | 2.22E-01 |
| MSMEG_2967 | conserved hypothetical protein                                                           | NA   | 0.998 | 9.77E-01 |
| MSMEG_2968 | conserved hypothetical protein                                                           | NA   | 0.951 | 5.89E-02 |
| MSMEG_2969 | NADH:flavin oxidoreductase/nadh oxidase                                                  | NA   | 0.986 | 9.59E-01 |
| MSMEG_2970 | polysaccharide deacetylase                                                               | NA   | 0.954 | 6.30E-01 |
| MSMEG_2971 | regulatory protein                                                                       | NA   | 1.126 | 1.77E-01 |
| MSMEG_2972 | permease, cytosine/purines, uracil, thiamine, allantoin family protein                   | NA   | 0.932 | 3.88E-01 |
| MSMEG_2972 | permease, cytosine/purines, uracil, thiamine, allantoin family protein                   | NA   | 1.135 | 3.81E-01 |
| MSMEG_2973 | peptidyl-prolyl cis-trans isomerase                                                      | NA   | 1.082 | 6.17E-01 |
| MSMEG_2974 | peptidyl-prolyl cis-trans isomerase, cyclophilin-type                                    | NA   | 0.950 | 4.68E-01 |
| MSMEG_2975 | metallo-beta-lactamase family protein                                                    | NA   | 1.147 | 7.48E-02 |
| MSMEG_2976 | histidyl-tRNA synthetase                                                                 | hisS | 1.002 | 9.84E-01 |
| MSMEG_2977 | hypothetical protein                                                                     | NA   | 1.197 | 3.86E-01 |
| MSMEG_2978 | ABC transporter ATP-binding protein                                                      | NA   | 0.866 | 3.26E-01 |
| MSMEG_2979 | ABC transporter ATP-binding protein                                                      | NA   | 0.832 | 3.29E-01 |
| MSMEG_2980 | putative membrane protein                                                                | NA   | 0.739 | 3.43E-02 |
| MSMEG_2981 | branched-chain amino acid ABC-type transport system, permease component                  | NA   | 0.649 | 8.13E-04 |
| MSMEG_2982 | putative periplasmic binding protein                                                     | NA   | 0.867 | 2.66E-01 |
| MSMEG_2983 | conserved hypothetical protein                                                           | NA   | 1.073 | 7.68E-01 |
| MSMEG_2984 | putative hydrolase                                                                       | NA   | 1.352 | 3.20E-01 |
| MSMEG_2985 | fumarate hydratase class I, anaerobic                                                    | NA   | 2.200 | 3.76E-01 |
| MSMEG_2986 | amidohydrolase, AtzE family protein                                                      | NA   | 1.331 | 5.95E-01 |
| MSMEG_2987 | conserved hypothetical protein; this gene contains a frame shift which is not the result | NA   | 2.300 | 3.81E-01 |
| MSMEG_2988 | carbon-nitrogen hydrolase family protein                                                 | NA   | 3.875 | 4.19E-01 |
| MSMEG_2989 | LacI family protein transcriptional regulator                                            | NA   | 0.792 | 9.40E-03 |

|            |                                                        |      |       |          |
|------------|--------------------------------------------------------|------|-------|----------|
| MSMEG_2990 | Fe-S protein, radical SAM family protein               | NA   | 1.093 | 7.35E-01 |
| MSMEG_2991 | permease of the major facilitator superfamily protein  | NA   | 1.624 | 2.21E-02 |
| MSMEG_2992 | putative acyl-CoA dehydrogenase                        | NA   | 0.759 | 1.53E-01 |
| MSMEG_2993 | acyl-CoA dehydrogenase, C- domain protein              | NA   | 1.205 | 2.30E-01 |
| MSMEG_2994 | amidohydrolase family protein                          | NA   | 1.014 | 7.07E-01 |
| MSMEG_2995 | transcriptional regulator, TetR family protein         | NA   | 1.337 | 3.36E-01 |
| MSMEG_2996 | conserved hypothetical protein                         | NA   | 0.981 | 9.24E-01 |
| MSMEG_2997 | conserved hypothetical protein                         | NA   | 1.366 | 3.25E-01 |
| MSMEG_2998 | conserved hypothetical protein                         | NA   | 1.099 | 2.72E-01 |
| MSMEG_2998 | conserved hypothetical protein                         | NA   | 1.249 | 5.98E-02 |
| MSMEG_2999 | conserved protein                                      | NA   | 1.033 | 7.01E-01 |
| MSMEG_3000 | metallopeptidase, zinc binding                         | NA   | 0.998 | 9.74E-01 |
| MSMEG_3001 | conserved hypothetical protein                         | NA   | 1.154 | 2.06E-01 |
| MSMEG_3002 | para-nitrobenzyl esterase                              | NA   | 1.003 | 9.86E-01 |
| MSMEG_3003 | aspartyl-tRNA synthetase                               | aspS | 1.078 | 3.78E-01 |
| MSMEG_3004 | conserved hypothetical protein TIGR00026               | NA   | 1.189 | 2.53E-01 |
| MSMEG_3005 | hydroxyacyl-CoA dehydrogenase                          | NA   | 1.195 | 5.73E-01 |
| MSMEG_3006 | Fe-dependent alcohol dehydrogenase                     | NA   | 1.649 | 2.42E-01 |
| MSMEG_3007 | succinate-semialdehyde dehydrogenase                   | NA   | 1.384 | 4.77E-01 |
| MSMEG_3008 | putative sigma 54 type regulator                       | NA   | 0.931 | 7.49E-01 |
| MSMEG_3009 | 2,5-dichloro-2,5-cyclohexadiene-1,4-diol dehydrogenase | NA   | 1.076 | 7.05E-01 |
| MSMEG_3010 | acetyl-hydrolase                                       | NA   | 0.914 | 4.81E-01 |
| MSMEG_3011 | steroid monooxygenase                                  | NA   | 0.961 | 7.89E-01 |
| MSMEG_3012 | acetyl-CoA acetyltransferases                          | NA   | 1.747 | 1.28E-01 |
| MSMEG_3013 | putative transcriptional regulator family protein      | NA   | 1.095 | 8.28E-02 |
| MSMEG_3014 | conserved hypothetical protein                         | NA   | 0.917 | 4.40E-01 |
| MSMEG_3015 | conserved hypothetical protein                         | NA   | 1.186 | 1.37E-01 |
| MSMEG_3016 | conserved hypothetical protein                         | NA   | 1.158 | 6.35E-01 |
| MSMEG_3017 | conserved hypothetical protein                         | NA   | 2.083 | 4.68E-01 |
| MSMEG_3018 | transglutaminase domain protein                        | NA   | 0.967 | 7.00E-01 |
| MSMEG_3019 | conserved hypothetical protein                         | NA   | 0.996 | 9.78E-01 |



|            |                                                                                             |      |       |          |
|------------|---------------------------------------------------------------------------------------------|------|-------|----------|
| MSMEG_3020 | conserved hypothetical protein                                                              | NA   | 1.044 | 4.65E-01 |
| MSMEG_3021 | AAA ATPase, central region                                                                  | NA   | 1.075 | 2.06E-01 |
| MSMEG_3022 | transglycosylase associated protein                                                         | NA   | 1.023 | 9.01E-01 |
| MSMEG_3023 | conserved hypothetical protein; this gene contains a frame shift which is not the result of | NA   | 1.679 | 5.84E-02 |
| MSMEG_3024 | conserved hypothetical protein                                                              | NA   | 1.084 | 7.11E-01 |
| MSMEG_3025 | alanyl-tRNA synthetase                                                                      | alaS | 1.125 | 2.61E-02 |
| MSMEG_3026 | conserved hypothetical protein                                                              | NA   | 1.152 | 1.50E-01 |
| MSMEG_3027 | conserved hypothetical protein                                                              | NA   | 1.109 | 2.48E-01 |
| MSMEG_3028 | shikimate-5-dehydrogenase                                                                   | aroE | 1.064 | 4.40E-01 |
| MSMEG_3029 | peptidase, A24 (type IV prepilin peptidase) family protein                                  | NA   | 1.159 | 1.14E-01 |
| MSMEG_3030 | chorismate synthase                                                                         | aroC | 1.060 | 2.64E-01 |
| MSMEG_3031 | shikimate kinase                                                                            | NA   | 1.194 | 2.27E-02 |
| MSMEG_3032 | conserved hypothetical protein                                                              | NA   | 0.870 | 1.29E-02 |
| MSMEG_3033 | 3-dehydroquinate synthase                                                                   | aroB | 1.046 | 6.52E-01 |
| MSMEG_3034 | metallopeptidase, M24 family protein                                                        | NA   | 0.880 | 1.73E-02 |
| MSMEG_3035 | translation elongation factor P                                                             | efp  | 0.962 | 3.61E-01 |
| MSMEG_3036 | transcription antitermination factor NusB                                                   | nusB | 1.172 | 4.42E-02 |
| MSMEG_3037 | regulatory protein; this gene contains a frame shift which is not the result of sequenci    | NA   | 1.186 | 1.02E-01 |
| MSMEG_3038 | hypothetical protein                                                                        | NA   | 1.017 | 7.15E-01 |
| MSMEG_3039 | monooxygenase                                                                               | NA   | 1.073 | 1.12E-01 |
| MSMEG_3040 | beta-lactamase                                                                              | NA   | 0.999 | 9.93E-01 |
| MSMEG_3041 | thiopurine S-methyltransferase (tpmt) superfamily protein                                   | NA   | 1.088 | 8.09E-02 |
| MSMEG_3042 | PyrR bifunctional protein                                                                   | NA   | 1.103 | 1.08E-01 |
| MSMEG_3043 | aspartate carbamoyltransferase                                                              | pyrB | 0.953 | 1.01E-01 |
| MSMEG_3044 | dihydroorotase                                                                              | NA   | 0.938 | 1.58E-01 |
| MSMEG_3045 | integral membrane protein                                                                   | NA   | 0.926 | 2.47E-01 |
| MSMEG_3046 | carbamoyl-phosphate synthase, small subunit                                                 | carA | 0.813 | 1.38E-02 |
| MSMEG_3047 | carbamoyl-phosphate synthase, large subunit                                                 | carB | 0.811 | 1.91E-02 |
| MSMEG_3048 | orotidine 5'-phosphate decarboxylase                                                        | pyrF | 0.950 | 6.41E-01 |
| MSMEG_3049 | hypothetical protein                                                                        | NA   | 1.017 | 9.29E-01 |
| MSMEG_3050 | integration host factor                                                                     | NA   | 0.825 | 1.40E-01 |

|            |                                                                                |       |       |          |
|------------|--------------------------------------------------------------------------------|-------|-------|----------|
| MSMEG_3051 | guanylate kinase                                                               | NA    | 0.833 | 2.87E-05 |
| MSMEG_3052 | hypothetical protein                                                           | NA    | 1.756 | 3.79E-01 |
| MSMEG_3053 | DNA-directed RNA polymerase, omega subunit                                     | rpoZ  | 1.083 | 1.88E-02 |
| MSMEG_3054 | phosphopantothenoylcysteine decarboxylase/phosphopantothenate--cysteine ligase | coaBC | 0.841 | 2.54E-02 |
| MSMEG_3055 | S-adenosylmethionine synthetase                                                | metK  | 0.823 | 3.27E-03 |
| MSMEG_3056 | ABC transporter ATP-binding protein                                            | NA    | 1.001 | 9.81E-01 |
| MSMEG_3057 | ABC-type metal ion transport system, permease component                        | NA    | 0.873 | 3.75E-02 |
| MSMEG_3058 | lipoprotein, nlpA family protein                                               | NA    | 0.802 | 3.08E-02 |
| MSMEG_3058 | lipoprotein, nlpA family protein                                               | NA    | 0.820 | 3.00E-02 |
| MSMEG_3059 | esterase                                                                       | NA    | 0.934 | 1.78E-01 |
| MSMEG_3060 | conserved hypothetical protein                                                 | NA    | 1.049 | 6.10E-01 |
| MSMEG_3061 | primosomal protein N'                                                          | priA  | 1.110 | 1.43E-01 |
| MSMEG_3062 | conserved hypothetical protein                                                 | NA    | 0.981 | 9.41E-01 |
| MSMEG_3063 | LemA protein                                                                   | NA    | 0.938 | 1.66E-01 |
| MSMEG_3064 | methionyl-tRNA formyltransferase                                               | fmt   | 1.014 | 8.39E-01 |
| MSMEG_3065 | ribosomal RNA small subunit methyltransferase B                                | sun   | 1.119 | 1.02E-01 |
| MSMEG_3066 | ribulose-phosphate 3-epimerase                                                 | rpe   | 1.180 | 1.51E-03 |
| MSMEG_3067 | riboflavin biosynthesis protein RibD                                           | ribD  | 1.119 | 1.28E-02 |
| MSMEG_3068 | hypothetical protein                                                           | NA    | 1.249 | 2.58E-02 |
| MSMEG_3069 | aminoglycosides/tetracycline-transport integral membrane protein               | NA    | 1.068 | 5.35E-01 |
| MSMEG_3070 | LprG protein                                                                   | NA    | 1.140 | 2.38E-01 |
| MSMEG_3071 | riboflavin synthase, alpha subunit                                             | ribE  | 0.974 | 6.21E-01 |
| MSMEG_3072 | riboflavin biosynthesis protein ribAB                                          | NA    | 0.922 | 7.43E-02 |
| MSMEG_3073 | 6,7-dimethyl-8-ribityllumazine synthase                                        | ribE  | 1.038 | 5.76E-01 |
| MSMEG_3074 | conserved hypothetical protein                                                 | NA    | 1.013 | 6.96E-01 |
| MSMEG_3075 | acetyltransferase, GNAT family protein                                         | NA    | 1.407 | 1.47E-01 |
| MSMEG_3076 | gamma-glutamyltransferase                                                      | ggt   | 0.852 | 5.54E-02 |
| MSMEG_3077 | hypothetical protein                                                           | NA    | 1.278 | 3.23E-01 |
| MSMEG_3078 | excinuclease ABC, C subunit                                                    | uvrC  | 1.238 | 7.60E-03 |
| MSMEG_3079 | conserved hypothetical protein                                                 | NA    | 0.965 | 3.95E-01 |
| MSMEG_3080 | conserved hypothetical protein                                                 | NA    | 1.163 | 8.52E-02 |

|            |                                                                                        |      |       |          |
|------------|----------------------------------------------------------------------------------------|------|-------|----------|
| MSMEG_3081 | conserved hypothetical protein                                                         | NA   | 1.133 | 9.98E-02 |
| MSMEG_3082 | soul heme-binding protein                                                              | NA   | 1.719 | 6.82E-03 |
| MSMEG_3083 | nucleoside-diphosphate sugar epimerase                                                 | NA   | 1.960 | 1.67E-01 |
| MSMEG_3084 | glyceraldehyde-3-phosphate dehydrogenase, type I                                       | gap  | 0.973 | 5.92E-01 |
| MSMEG_3085 | phosphoglycerate kinase                                                                | pgk  | 0.912 | 3.56E-01 |
| MSMEG_3086 | triosephosphate isomerase                                                              | tpiA | 1.036 | 7.12E-01 |
| MSMEG_3087 | preprotein translocase, SecG subunit                                                   | secG | 1.219 | 8.09E-02 |
| MSMEG_3088 | O-methyltransferase; this gene contains a premature stop which is not the result of se | NA   | 1.272 | 1.88E-01 |
| MSMEG_3088 | O-methyltransferase; this gene contains a premature stop which is not the result of se | NA   | 1.399 | 3.46E-02 |
| MSMEG_3089 | deoxyribose-phosphate aldolase                                                         | deoC | 0.945 | 6.82E-01 |
| MSMEG_3090 | ribose transport system permease protein RbsC                                          | NA   | 0.570 | 1.54E-02 |
| MSMEG_3091 | ribose transport ATP-binding protein RbsA                                              | NA   | 0.969 | 8.12E-01 |
| MSMEG_3092 | transcriptional regulator, sugar-binding family protein                                | NA   | 2.085 | 5.16E-01 |
| MSMEG_3093 | putative sugar kinase protein                                                          | NA   | 0.872 | 5.30E-01 |
| MSMEG_3094 | oxidoreductase, zinc-binding dehydrogenase family protein                              | NA   | 0.634 | 4.08E-02 |
| MSMEG_3095 | D-ribose-binding periplasmic protein                                                   | NA   | 0.554 | 2.39E-03 |
| MSMEG_3096 | hypothetical protein                                                                   | NA   | 0.970 | 8.26E-01 |
| MSMEG_3097 | phosphoenolpyruvate carboxylase                                                        | ppc  | 0.986 | 7.00E-01 |
| MSMEG_3098 | conserved hypothetical protein                                                         | NA   | 1.313 | 1.61E-02 |
| MSMEG_3099 | 6-phosphogluconolactonase                                                              | pgl  | 0.879 | 1.64E-01 |
| MSMEG_3100 | OpcA protein                                                                           | opcA | 0.933 | 6.20E-01 |
| MSMEG_3101 | glucose-6-phosphate 1-dehydrogenase                                                    | zwf  | 0.949 | 6.62E-01 |
| MSMEG_3102 | transaldolase                                                                          | tal  | 0.892 | 3.02E-01 |
| MSMEG_3103 | transketolase                                                                          | tkt  | 0.987 | 8.98E-01 |
| MSMEG_3104 | hypothetical protein                                                                   | NA   | 1.138 | 3.67E-01 |
| MSMEG_3105 | protoheme IX farnesyltransferase                                                       | cyoE | 1.044 | 4.35E-01 |
| MSMEG_3106 | quinone oxidoreductase                                                                 | NA   | 0.954 | 5.90E-01 |
| MSMEG_3107 | conserved hypothetical protein                                                         | NA   | 1.239 | 1.93E-01 |
| MSMEG_3108 | ABC transporter, ATPase subunit                                                        | NA   | 0.866 | 4.92E-01 |
| MSMEG_3109 | binding-protein-dependent transport systems inner membrane component                   | NA   | 0.898 | 1.42E-01 |
| MSMEG_3110 | binding-protein-dependent transport systems inner membrane component                   | NA   | 1.096 | 5.30E-01 |

|            |                                                                         |      |       |          |
|------------|-------------------------------------------------------------------------|------|-------|----------|
| MSMEG_3111 | extracellular solute-binding protein, family protein 1                  | NA   | 1.017 | 8.81E-01 |
| MSMEG_3112 | estradiol 17-beta-dehydrogenase 8                                       | NA   | 0.925 | 2.09E-01 |
| MSMEG_3113 | carbohydrate kinase, fggy                                               | NA   | 1.085 | 3.13E-01 |
| MSMEG_3114 | conserved hypothetical protein                                          | NA   | 1.041 | 5.73E-01 |
| MSMEG_3115 | regulatory protein, DeoR                                                | NA   | 1.221 | 3.34E-02 |
| MSMEG_3116 | inositol-1-monophosphatase                                              | NA   | 0.911 | 3.29E-01 |
| MSMEG_3117 | cytochrome aa3 controlling protein                                      | NA   | 1.517 | 3.21E-02 |
| MSMEG_3118 | ABC transporter efflux protein, DrrB family protein                     | NA   | 1.031 | 7.57E-01 |
| MSMEG_3119 | ABC transporter, ATP-binding subunit                                    | NA   | 1.063 | 9.91E-02 |
| MSMEG_3120 | conserved hypothetical protein                                          | NA   | 1.003 | 7.05E-01 |
| MSMEG_3121 | DNA-binding protein                                                     | NA   | 0.807 | 8.45E-03 |
| MSMEG_3122 | FeS assembly protein SufB                                               | sufB | 1.057 | 3.80E-01 |
| MSMEG_3123 | FeS assembly protein SufD                                               | sufD | 0.959 | 4.30E-01 |
| MSMEG_3124 | FeS assembly ATPase SufC                                                | sufC | 1.084 | 1.67E-02 |
| MSMEG_3125 | cysteine desulfurase                                                    | NA   | 0.994 | 9.38E-01 |
| MSMEG_3126 | SUF system FeS assembly protein, NifU family protein                    | NA   | 0.913 | 1.67E-01 |
| MSMEG_3127 | conserved protein, DUF59                                                | NA   | 0.915 | 3.18E-02 |
| MSMEG_3128 | hypothetical protein                                                    | NA   | 0.940 | 5.04E-01 |
| MSMEG_3129 | putative HTH-type transcriptional regulator                             | NA   | 1.227 | 4.33E-02 |
| MSMEG_3130 | hypothetical protein                                                    | NA   | 1.074 | 2.90E-01 |
| MSMEG_3131 | AMP-binding protein                                                     | NA   | 0.954 | 6.47E-01 |
| MSMEG_3132 | DNA-binding protein                                                     | NA   | 1.027 | 5.43E-01 |
| MSMEG_3133 | hypothetical protein                                                    | NA   | 0.985 | 9.21E-01 |
| MSMEG_3134 | cytochrome P450 107B1                                                   | NA   | 0.967 | 7.67E-01 |
| MSMEG_3135 | hypothetical protein                                                    | NA   | 1.118 | 6.08E-01 |
| MSMEG_3136 | heme peroxidase superfamily protein                                     | NA   | 0.896 | 2.96E-01 |
| MSMEG_3137 | oxidoreductase                                                          | NA   | 2.676 | 1.50E-02 |
| MSMEG_3138 | thioredoxin                                                             | trx  | 1.051 | 3.74E-01 |
| MSMEG_3139 | enoyl-CoA hydratase/isomerase                                           | NA   | 1.298 | 3.75E-02 |
| MSMEG_3140 | ABC transporter ATP-binding protein, possibly in EF-3 subfamily protein | NA   | 1.574 | 2.61E-02 |
| MSMEG_3141 | conserved domain protein                                                | NA   | 1.593 | 7.89E-02 |

|            |                                                                         |      |       |          |
|------------|-------------------------------------------------------------------------|------|-------|----------|
| MSMEG_3142 | HTH-type transcriptional repressor AcnR                                 | NA   | 1.058 | 8.21E-02 |
| MSMEG_3143 | aconitate hydratase 1                                                   | acnA | 0.954 | 1.65E-01 |
| MSMEG_3144 | putative membrane protein                                               | NA   | 1.081 | 1.07E-01 |
| MSMEG_3145 | secreted cell wall-associated hydrolase                                 | NA   | 0.939 | 4.95E-01 |
| MSMEG_3146 | invasin 1                                                               | NA   | 0.926 | 8.89E-02 |
| MSMEG_3147 | ATPase, MoxR family protein                                             | moxR | 0.831 | 1.07E-01 |
| MSMEG_3148 | conserved hypothetical protein                                          | NA   | 0.952 | 5.58E-01 |
| MSMEG_3149 | conserved hypothetical protein                                          | NA   | 0.761 | 7.76E-03 |
| MSMEG_3150 | 3-oxoacyl-(acyl-carrier-protein) reductase                              | fabG | 0.817 | 2.60E-03 |
| MSMEG_3151 | [NADH] enoyl-[acyl-carrier-protein] reductase                           | NA   | 1.064 | 4.09E-01 |
| MSMEG_3152 | ferrochelatase                                                          | hemH | 1.019 | 7.56E-01 |
| MSMEG_3153 | conserved hypothetical protein                                          | NA   | 1.444 | 7.83E-03 |
| MSMEG_3154 | membrane protein implicated in regulation of membrane protease activity | NA   | 1.060 | 4.75E-01 |
| MSMEG_3155 | band 7 protein                                                          | NA   | 0.960 | 2.97E-01 |
| MSMEG_3156 | conserved hypothetical protein                                          | NA   | 1.019 | 7.73E-01 |
| MSMEG_3157 | conserved hypothetical protein                                          | NA   | 1.161 | 3.25E-03 |
| MSMEG_3158 | methylmalonyl-CoA mutase, small subunit                                 | mutA | 0.782 | 2.44E-03 |
| MSMEG_3159 | methylmalonyl-CoA mutase large subunit                                  | NA   | 0.698 | 6.08E-03 |
| MSMEG_3160 | LAO/AO transport system ATPase                                          | NA   | 0.642 | 2.90E-03 |
| MSMEG_3161 | conserved hypothetical protein                                          | NA   | 0.634 | 4.39E-04 |
| MSMEG_3162 | beta-lactamase                                                          | NA   | 0.675 | 1.37E-02 |
| MSMEG_3163 | gp55 protein                                                            | NA   | 0.997 | 9.73E-01 |
| MSMEG_3164 | hypothetical protein                                                    | NA   | 0.856 | 6.95E-02 |
| MSMEG_3168 | phenolphthlocerol synthesis type-i polyketide synthase ppse             | NA   | 0.964 | 5.18E-01 |
| MSMEG_3169 | isoleucyl-tRNA synthetase                                               | ileS | 0.834 | 1.83E-02 |
| MSMEG_3170 | conserved domain protein                                                | NA   | 1.230 | 1.07E-01 |
| MSMEG_3171 | conserved hypothetical protein                                          | NA   | 0.981 | 6.05E-01 |
| MSMEG_3172 | DNA polymerase IV 1                                                     | NA   | 1.048 | 6.59E-01 |
| MSMEG_3173 | L-asparaginase                                                          | NA   | 1.164 | 1.19E-02 |
| MSMEG_3174 | lipoprotein signal peptidase                                            | NA   | 1.309 | 4.80E-02 |
| MSMEG_3175 | ribosomal large subunit pseudouridine synthase D                        | NA   | 1.068 | 3.59E-01 |

|            |                                                                                         |      |       |          |
|------------|-----------------------------------------------------------------------------------------|------|-------|----------|
| MSMEG_3176 | RarD protein                                                                            | rarD | 1.035 | 6.63E-01 |
| MSMEG_3177 | probable transcriptional regulatory protein, putative                                   | NA   | 1.136 | 6.51E-01 |
| MSMEG_3178 | DNA polymerase III alpha subunit                                                        | NA   | 0.812 | 1.23E-02 |
| MSMEG_3179 | pyridoxamine 5'-phosphate oxidase family protein                                        | NA   | 1.241 | 4.20E-01 |
| MSMEG_3180 | transcriptional regulator, MerR family protein                                          | NA   | 1.279 | 2.04E-01 |
| MSMEG_3181 | conserved hypothetical protein                                                          | NA   | 1.006 | 9.53E-01 |
| MSMEG_3182 | hypothetical protein                                                                    | NA   | 1.298 | 1.29E-01 |
| MSMEG_3183 | threonine dehydratase                                                                   | ilvA | 1.697 | 1.08E-03 |
| MSMEG_3184 | malto-oligosyltrehalose trehalohydrolase                                                | treZ | 0.893 | 1.99E-01 |
| MSMEG_3185 | putative maltooligosyl trehalose synthase; this gene contains a frame shift which is no | NA   | 0.912 | 3.58E-01 |
| MSMEG_3185 | putative maltooligosyl trehalose synthase; this gene contains a frame shift which is no | NA   | 1.166 | 3.65E-01 |
| MSMEG_3186 | glycogen debranching enzyme GlgX                                                        | glgX | 1.252 | 4.43E-01 |
| MSMEG_3187 | putative acyltransferase domain protein                                                 | NA   | 0.805 | 1.12E-03 |
| MSMEG_3188 | adenosylmethionine-8-amino-7-oxononanoate transaminase                                  | bioA | 1.123 | 3.98E-01 |
| MSMEG_3189 | 8-amino-7-oxononanoate synthase                                                         | bioF | 1.234 | 2.77E-01 |
| MSMEG_3190 | dethiobiotin synthase                                                                   | bioD | 1.002 | 9.85E-01 |
| MSMEG_3191 | conserved hypothetical protein                                                          | NA   | 1.069 | 2.95E-01 |
| MSMEG_3192 | conserved hypothetical protein, putative                                                | NA   | 1.515 | 5.46E-02 |
| MSMEG_3193 | transcriptional regulator, TetR family protein                                          | NA   | 1.213 | 7.59E-02 |
| MSMEG_3194 | biotin synthase                                                                         | bioB | 0.794 | 1.03E-02 |
| MSMEG_3195 | conserved hypothetical protein                                                          | NA   | 0.903 | 1.56E-01 |
| MSMEG_3196 | conserved hypothetical protein                                                          | NA   | 1.008 | 9.02E-01 |
| MSMEG_3197 | lipase                                                                                  | NA   | 1.155 | 2.35E-01 |
| MSMEG_3198 | hydrolase, NUDIX family protein                                                         | NA   | 1.117 | 1.93E-03 |
| MSMEG_3199 | quinolinate synthetase complex, A subunit                                               | nadA | 1.022 | 6.88E-01 |
| MSMEG_3200 | L-aspartate oxidase                                                                     | nadB | 0.885 | 3.32E-01 |
| MSMEG_3201 | nicotinate-nucleotide pyrophosphorylase                                                 | nadC | 0.913 | 1.87E-01 |
| MSMEG_3202 | hypothetical protein                                                                    | NA   | 0.971 | 8.83E-01 |
| MSMEG_3203 | transporter, LysE family protein                                                        | NA   | 1.289 | 8.07E-03 |
| MSMEG_3204 | conserved hypothetical protein                                                          | NA   | 0.930 | 2.11E-01 |
| MSMEG_3205 | histidinol dehydrogenase                                                                | hisD | 1.081 | 1.21E-01 |

|            |                                                                                     |       |       |          |
|------------|-------------------------------------------------------------------------------------|-------|-------|----------|
| MSMEG_3206 | histidinol-phosphate aminotransferase                                               | hisC  | 1.316 | 5.41E-02 |
| MSMEG_3207 | imidazoleglycerol-phosphate dehydratase                                             | hisB  | 1.375 | 5.50E-02 |
| MSMEG_3208 | imidazole glycerol phosphate synthase, glutamine amidotransferase subunit           | hisH  | 1.164 | 9.19E-02 |
| MSMEG_3209 | bifunctional HisA/TrpF protein                                                      | NA    | 1.197 | 2.11E-01 |
| MSMEG_3210 | inositol monophosphate phosphatase                                                  | NA    | 1.133 | 2.04E-01 |
| MSMEG_3211 | imidazoleglycerol phosphate synthase, cyclase subunit                               | hisF  | 1.077 | 5.21E-01 |
| MSMEG_3212 | phosphoribosyl-AMP pyrophosphatase/phosphoribosyl-ATP cyclohydrolase                | hisIE | 1.306 | 1.11E-01 |
| MSMEG_3213 | conserved hypothetical protein                                                      | NA    | 1.217 | 6.26E-02 |
| MSMEG_3214 | hypothetical protein                                                                | NA    | 1.063 | 4.46E-01 |
| MSMEG_3215 | ABC-type molybdenum transport system, ATPase component/photorepair protein Phr      | NA    | 0.989 | 6.53E-01 |
| MSMEG_3216 | peroxiredoxin Q                                                                     | NA    | 1.034 | 5.77E-01 |
| MSMEG_3217 | anthranilate synthase component I                                                   | trpE  | 1.181 | 1.25E-01 |
| MSMEG_3218 | trp region conserved hypothetical membrane protein                                  | NA    | 1.219 | 2.82E-02 |
| MSMEG_3219 | indole-3-glycerol phosphate synthase                                                | trpC  | 0.982 | 7.16E-01 |
| MSMEG_3220 | tryptophan synthase, beta subunit                                                   | trpB  | 0.889 | 1.63E-01 |
| MSMEG_3221 | tryptophan synthase, alpha subunit                                                  | trpA  | 1.075 | 3.74E-01 |
| MSMEG_3222 | prolipoprotein diacylglyceryl transferase                                           | NA    | 0.815 | 3.42E-02 |
| MSMEG_3223 | TM2 domain protein                                                                  | NA    | 0.819 | 4.44E-02 |
| MSMEG_3224 | conserved hypothetical protein                                                      | NA    | 0.929 | 5.23E-01 |
| MSMEG_3225 | ferredoxin-dependent glutamate synthase 1                                           | NA    | 0.984 | 8.05E-01 |
| MSMEG_3226 | glutamate synthase, NADH/nadph, small subunit                                       | NA    | 1.039 | 8.18E-01 |
| MSMEG_3227 | pyruvate kinase                                                                     | pyk   | 0.973 | 7.60E-01 |
| MSMEG_3228 | acyl-CoA thioesterase II                                                            | NA    | 1.050 | 4.47E-01 |
| MSMEG_3229 | conserved hypothetical protein                                                      | NA    | 1.096 | 2.23E-01 |
| MSMEG_3230 | ABC transporter, CydDC cysteine exporter (CydDC-E) family, permease/ATP-binding pr  | NA    | 0.857 | 2.39E-01 |
| MSMEG_3231 | ABC transporter, CydDC cysteine exporter (CydDC-E) family protein, permease/ATP-bir | cydD  | 1.094 | 3.85E-01 |
| MSMEG_3232 | cytochrome D ubiquinol oxidase, subunit II                                          | cydB  | 1.166 | 6.91E-02 |
| MSMEG_3233 | cytochrome D ubiquinol oxidase subunit 1                                            | NA    | 1.440 | 3.10E-03 |
| MSMEG_3234 | integral membrane protein                                                           | NA    | 1.390 | 2.77E-02 |
| MSMEG_3235 | ABC-type amino acid transport system, secreted component                            | NA    | 1.298 | 1.83E-02 |
| MSMEG_3236 | ABC-type amino acid transport system, permease component                            | NA    | 1.197 | 1.12E-01 |

|            |                                                                                          |      |       |          |
|------------|------------------------------------------------------------------------------------------|------|-------|----------|
| MSMEG_3237 | ATP-binding protein                                                                      | NA   | 1.152 | 1.26E-01 |
| MSMEG_3238 | 3-mercaptopyruvate sulfurtransferase                                                     | NA   | 1.206 | 4.14E-02 |
| MSMEG_3239 | two-component system sensor kinase                                                       | NA   | 0.902 | 1.53E-01 |
| MSMEG_3240 | DNA-binding response regulator, LuxR family protein                                      | NA   | 0.986 | 8.73E-01 |
| MSMEG_3241 | conserved hypothetical protein                                                           | NA   | 1.176 | 6.23E-01 |
| MSMEG_3242 | starvation-inducible DNA-binding protein or fine tangled pili major subunit              | NA   | 1.040 | 7.98E-01 |
| MSMEG_3243 | adenylate cyclase; this gene contains a frame shift which is not the result of sequencin | NA   | 0.901 | 2.91E-01 |
| MSMEG_3244 | hypothetical protein                                                                     | NA   | 1.265 | 2.27E-01 |
| MSMEG_3246 | response regulator                                                                       | NA   | 0.886 | 2.85E-01 |
| MSMEG_3247 | branched-chain amino acid ABC transporter substrate-binding protein                      | NA   | 0.885 | 3.76E-02 |
| MSMEG_3248 | ABC transporter branched chain amino acid transport permease                             | NA   | 0.772 | 1.44E-02 |
| MSMEG_3249 | branched-chain amino acid ABC transporter, permease protein                              | NA   | 0.805 | 3.42E-02 |
| MSMEG_3250 | ABC transporter, ATP-binding protein                                                     | NA   | 0.843 | 1.21E-02 |
| MSMEG_3251 | branched-chain amino acid ABC transporter ATP-binding protein                            | NA   | 0.885 | 3.87E-02 |
| MSMEG_3252 | membrane protein                                                                         | NA   | 0.990 | 7.43E-01 |
| MSMEG_3253 | conserved hypothetical protein                                                           | NA   | 0.690 | 4.62E-05 |
| MSMEG_3254 | RDD family protein, putative                                                             | NA   | 1.087 | 3.90E-01 |
| MSMEG_3255 | DoxX subfamily protein, putative                                                         | NA   | 1.325 | 2.89E-01 |
| MSMEG_3256 | mucin-associated surface protein                                                         | NA   | 0.873 | 2.44E-02 |
| MSMEG_3257 | xylulokinase                                                                             | xylB | 1.062 | 4.74E-01 |
| MSMEG_3258 | hypothetical protein                                                                     | NA   | 0.932 | 1.96E-01 |
| MSMEG_3259 | acyl-CoA dehydrogenase                                                                   | NA   | 0.959 | 5.87E-01 |
| MSMEG_3260 | LysR-family protein transcriptional regulator                                            | NA   | 1.169 | 2.88E-01 |
| MSMEG_3261 | conserved hypothetical protein                                                           | NA   | 0.854 | 3.90E-02 |
| MSMEG_3262 | L-xylulose reductase                                                                     | NA   | 0.925 | 6.28E-02 |
| MSMEG_3263 | xylulose kinase                                                                          | NA   | 0.956 | 5.15E-01 |
| MSMEG_3264 | transcriptional regulator                                                                | NA   | 0.920 | 3.93E-01 |
| MSMEG_3265 | arabitol-phosphate dehydrogenase                                                         | NA   | 0.727 | 3.32E-03 |
| MSMEG_3266 | maltose/maltodextrin-binding protein                                                     | NA   | 0.706 | 1.77E-02 |
| MSMEG_3267 | transporter                                                                              | NA   | 0.591 | 4.34E-02 |
| MSMEG_3268 | ABC transporter, permease protein                                                        | NA   | 0.842 | 5.50E-02 |



|            |                                                                                          |    |       |          |
|------------|------------------------------------------------------------------------------------------|----|-------|----------|
| MSMEG_3269 | putative sugar ABC transporter ATP-binding protein                                       | NA | 0.593 | 1.58E-02 |
| MSMEG_3270 | SN-glycerol-3-phosphate ABC transporter, ATP-binding protein                             | NA | 0.793 | 2.10E-01 |
| MSMEG_3271 | dihydroxyacetone kinase                                                                  | NA | 0.802 | 2.90E-01 |
| MSMEG_3272 | ribose 5-phosphate isomerase                                                             | NA | 0.943 | 7.80E-02 |
| MSMEG_3273 | glutamyl aminopeptidase, M42 family protein                                              | NA | 1.242 | 3.59E-01 |
| MSMEG_3274 | MerR-family protein transcriptional regulator                                            | NA | 1.186 | 4.38E-01 |
| MSMEG_3275 | RNA polymerase sigma factor, sigma-70 family protein                                     | NA | 0.927 | 2.26E-01 |
| MSMEG_3276 | integral membrane protein                                                                | NA | 1.337 | 1.24E-01 |
| MSMEG_3277 | polyamine ABC transporter integral membrane protein                                      | NA | 0.881 | 1.08E-02 |
| MSMEG_3278 | conserved hypothetical protein                                                           | NA | 1.270 | 7.99E-02 |
| MSMEG_3279 | polyamine ABC transporter permease protein                                               | NA | 0.861 | 1.65E-01 |
| MSMEG_3280 | polyamine-binding lipoprotein                                                            | NA | 0.825 | 5.34E-02 |
| MSMEG_3281 | spermidine/putrescine ABC transporter ATP-binding subunit                                | NA | 0.925 | 1.88E-01 |
| MSMEG_3282 | hypothetical protein                                                                     | NA | 0.916 | 5.21E-01 |
| MSMEG_3283 | membrane transport protein                                                               | NA | 1.189 | 1.02E-01 |
| MSMEG_3284 | transcriptional regulator, MarR family protein                                           | NA | 0.945 | 1.10E-01 |
| MSMEG_3285 | 3-isopropylmalate dehydrogenase                                                          | NA | 0.928 | 2.38E-01 |
| MSMEG_3286 | methyltransferase                                                                        | NA | 0.871 | 6.51E-03 |
| MSMEG_3287 | hydrolase, alpha/beta fold family protein                                                | NA | 0.796 | 7.17E-03 |
| MSMEG_3288 | LysM domain protein                                                                      | NA | 1.457 | 4.02E-01 |
| MSMEG_3289 | gp61 protein                                                                             | NA | 1.052 | 7.86E-01 |
| MSMEG_3290 | regulatory protein                                                                       | NA | 0.849 | 3.34E-01 |
| MSMEG_3291 | hypothetical protein                                                                     | NA | 0.938 | 5.91E-01 |
| MSMEG_3292 | DNA-binding protein                                                                      | NA | 1.193 | 5.42E-01 |
| MSMEG_3293 | hypothetical protein                                                                     | NA | 1.164 | 3.22E-01 |
| MSMEG_3294 | hypothetical protein                                                                     | NA | 2.612 | 3.98E-01 |
| MSMEG_3295 | hypothetical protein                                                                     | NA | 1.079 | 4.18E-01 |
| MSMEG_3296 | ECF-family protein sigma factor H                                                        | NA | 1.197 | 6.60E-01 |
| MSMEG_3297 | transcriptional regulator, CadC                                                          | NA | 0.581 | 1.49E-02 |
| MSMEG_3298 | response regulator receiver domain protein                                               | NA | 0.611 | 1.76E-02 |
| MSMEG_3299 | putative oxidoreductase; this gene contains a frame shift which is not the result of seq | NA | 0.621 | 3.25E-02 |

|            |                                                                                          |      |       |          |
|------------|------------------------------------------------------------------------------------------|------|-------|----------|
| MSMEG_3300 | oxidoreductase, Gfo/Idh/MocA family protein                                              | NA   | 0.778 | 2.44E-01 |
| MSMEG_3301 | conserved hypothetical protein                                                           | NA   | 1.262 | 6.13E-01 |
| MSMEG_3302 | short-chain dehydrogenase/reductase SDR                                                  | NA   | 0.577 | 5.29E-03 |
| MSMEG_3303 | carboxylic ester hydrolase                                                               | NA   | 0.781 | 4.26E-03 |
| MSMEG_3304 | succinate semialdehyde dehydrogenase                                                     | NA   | 1.209 | 4.61E-01 |
| MSMEG_3305 | integral membrane protein DUF6                                                           | NA   | 1.277 | 2.47E-01 |
| MSMEG_3306 | zinc-binding alcohol dehydrogenase                                                       | NA   | 1.030 | 7.03E-01 |
| MSMEG_3307 | methyltransferase FkbM; this gene contains a frame shift which is not the result of seq  | NA   | 0.987 | 9.20E-01 |
| MSMEG_3307 | methyltransferase FkbM; this gene contains a frame shift which is not the result of seq  | NA   | 1.687 | 1.99E-01 |
| MSMEG_3308 | universal stress protein family protein, putative                                        | NA   | 1.114 | 1.97E-01 |
| MSMEG_3309 | conserved hypothetical protein                                                           | NA   | 1.087 | 1.75E-01 |
| MSMEG_3310 | integral membrane protein                                                                | NA   | 1.335 | 2.91E-01 |
| MSMEG_3311 | acyl carrier protein                                                                     | NA   | 0.984 | 9.35E-01 |
| MSMEG_3312 | hemerythrin HHE cation binding domain subfamily protein, putative                        | NA   | 1.115 | 7.98E-01 |
| MSMEG_3313 | xylose repressor, putative                                                               | NA   | 1.092 | 1.14E-01 |
| MSMEG_3314 | transport protein                                                                        | NA   | 1.672 | 8.27E-02 |
| MSMEG_3315 | hypothetical protein                                                                     | NA   | 0.947 | 2.29E-01 |
| MSMEG_3316 | transporter, major facilitator family protein                                            | NA   | 1.042 | 7.08E-01 |
| MSMEG_3317 | dihydrodipicolinate reductase, N-terminus domain protein                                 | dapB | 1.077 | 7.73E-01 |
| MSMEG_3318 | oxidoreductase                                                                           | NA   | 0.952 | 6.75E-01 |
| MSMEG_3319 | repressor protein                                                                        | NA   | 1.533 | 1.60E-01 |
| MSMEG_3320 | LysR-family transcriptional regulator; this gene contains a frame shift which is not the | NA   | 1.065 | 6.79E-01 |
| MSMEG_3321 | ATP/GTP-binding protein                                                                  | NA   | 0.876 | 5.23E-01 |
| MSMEG_3322 | hypothetical protein                                                                     | NA   | 1.117 | 3.37E-01 |
| MSMEG_3323 | conserved hypothetical protein                                                           | NA   | 1.080 | 1.45E-01 |
| MSMEG_3324 | hypothetical protein                                                                     | NA   | 1.139 | 6.71E-01 |
| MSMEG_3325 | conserved hypothetical protein                                                           | NA   | 1.076 | 7.25E-01 |
| MSMEG_3326 | carboxylate-amine ligase                                                                 | NA   | 0.843 | 5.17E-03 |
| MSMEG_3327 | hypothetical protein                                                                     | NA   | 0.849 | 5.81E-02 |
| MSMEG_3328 | hypothetical protein                                                                     | NA   | 0.905 | 1.06E-01 |
| MSMEG_3329 | hypothetical protein                                                                     | NA   | 0.817 | 6.89E-02 |

|            |                                                                                          |    |       |          |
|------------|------------------------------------------------------------------------------------------|----|-------|----------|
| MSMEG_3330 | conserved domain protein                                                                 | NA | 0.745 | 5.47E-03 |
| MSMEG_3331 | hypothetical protein                                                                     | NA | 0.921 | 3.63E-01 |
| MSMEG_3332 | transcriptional regulator, TetR family protein                                           | NA | 0.910 | 4.06E-01 |
| MSMEG_3333 | putative fatty acid desaturase, authentic frameshift; this gene contains a frame shift w | NA | 0.845 | 3.76E-02 |
| MSMEG_3334 | hypothetical protein                                                                     | NA | 0.969 | 2.37E-01 |
| MSMEG_3335 | transcriptional regulator, lclR family protein, putative                                 | NA | 0.964 | 7.82E-01 |
| MSMEG_3336 | hydrolase                                                                                | NA | 0.903 | 2.37E-01 |
| MSMEG_3337 | hypothetical protein                                                                     | NA | 0.887 | 1.77E-01 |
| MSMEG_3338 | oxidoreductase, FAD/FMN-binding                                                          | NA | 0.954 | 7.45E-01 |
| MSMEG_3339 | hypothetical protein                                                                     | NA | 1.045 | 7.68E-01 |
| MSMEG_3340 | hypothetical protein                                                                     | NA | 0.980 | 8.31E-01 |
| MSMEG_3341 | Transposase IS116/IS110/IS902 family protein                                             | NA | 0.777 | 1.11E-01 |
| MSMEG_3342 | hypothetical protein                                                                     | NA | 1.139 | 4.07E-01 |
| MSMEG_3343 | hypothetical protein                                                                     | NA | 1.178 | 6.74E-02 |
| MSMEG_3344 | hypothetical protein                                                                     | NA | 0.870 | 5.50E-02 |
| MSMEG_3345 | transcriptional regulator, GntR family protein                                           | NA | 1.037 | 5.47E-01 |
| MSMEG_3346 | putative hydroxyacid aldolase                                                            | NA | 0.867 | 4.13E-01 |
| MSMEG_3347 | nitrilase/cyanide hydratase and apolipoprotein N-acyltransferase                         | NA | 0.806 | 7.12E-02 |
| MSMEG_3348 | bacterial extracellular solute-binding protein, family protein 7                         | NA | 1.315 | 4.78E-01 |
| MSMEG_3349 | trap dicarboxylate transporter, dctq subunit, putative                                   | NA | 0.991 | 9.24E-01 |
| MSMEG_3350 | TRAP transporter, DctM-like membrane protein                                             | NA | 1.140 | 5.82E-01 |
| MSMEG_3351 | hypothetical protein                                                                     | NA | 1.825 | 3.79E-01 |
| MSMEG_3352 | hypothetical protein                                                                     | NA | 0.823 | 1.30E-01 |
| MSMEG_3353 | hypothetical protein                                                                     | NA | 0.914 | 1.60E-01 |
| MSMEG_3354 | TetR family protein transcriptional regulatory protein                                   | NA | 1.180 | 2.40E-01 |
| MSMEG_3355 | conserved hypothetical protein                                                           | NA | 0.952 | 5.25E-01 |
| MSMEG_3356 | conserved hypothetical protein TIGR00026                                                 | NA | 0.894 | 1.92E-01 |
| MSMEG_3357 | metal-dependent phosphohydrolase, HD subdomain                                           | NA | 1.010 | 9.19E-01 |
| MSMEG_3358 | YaeQ protein                                                                             | NA | 1.193 | 1.28E-01 |
| MSMEG_3359 | cis-3-chloroacrylic acid dehalogenase, putative                                          | NA | 1.029 | 7.19E-01 |
| MSMEG_3360 | transcriptional regulator, putative                                                      | NA | 1.390 | 6.33E-04 |

|            |                                                                                     |    |       |          |
|------------|-------------------------------------------------------------------------------------|----|-------|----------|
| MSMEG_3361 | conserved hypothetical protein                                                      | NA | 1.322 | 2.50E-01 |
| MSMEG_3362 | enoyl-CoA hydratase                                                                 | NA | 2.374 | 3.83E-01 |
| MSMEG_3363 | regulatory protein, TetR                                                            | NA | 0.638 | 3.87E-03 |
| MSMEG_3364 | RhtB family protein transporter                                                     | NA | 0.686 | 1.79E-03 |
| MSMEG_3365 | transcriptional regulator, AraC family protein                                      | NA | 0.728 | 8.95E-03 |
| MSMEG_3366 | isonitrile hydratase, putative                                                      | NA | 0.627 | 8.52E-03 |
| MSMEG_3367 | short-chain dehydrogenase/reductase SDR                                             | NA | 0.877 | 4.42E-02 |
| MSMEG_3368 | hypothetical protein                                                                | NA | 0.874 | 2.68E-01 |
| MSMEG_3369 | putative transport protein                                                          | NA | 1.162 | 6.24E-01 |
| MSMEG_3370 | hypothetical protein                                                                | NA | 1.020 | 8.99E-01 |
| MSMEG_3371 | short-chain dehydrogenase/reductase SDR; this region contains one or more premature | NA | 1.050 | 6.03E-01 |
| MSMEG_3372 | transcriptional regulator, ArsR family protein                                      | NA | 1.355 | 4.81E-02 |
| MSMEG_3373 | major facilitator superfamily protein MFS_1                                         | NA | 1.637 | 2.19E-02 |
| MSMEG_3374 | conserved hypothetical protein                                                      | NA | 1.089 | 2.47E-01 |
| MSMEG_3375 | alcohol dehydrogenase                                                               | NA | 0.726 | 1.56E-02 |
| MSMEG_3376 | beta-lactamase                                                                      | NA | 0.788 | 1.38E-02 |
| MSMEG_3377 | hypothetical protein                                                                | NA | 1.196 | 7.29E-02 |
| MSMEG_3378 | beta-lactamase                                                                      | NA | 0.974 | 7.82E-01 |
| MSMEG_3379 | 2-deoxy-D-gluconate 3-dehydrogenase                                                 | NA | 1.155 | 1.19E-01 |
| MSMEG_3380 | pyridoxamine 5'-phosphate oxidase-related, FMN-binding                              | NA | 0.842 | 7.03E-02 |
| MSMEG_3381 | acyl carrier protein phosphodiesterase                                              | NA | 0.960 | 5.03E-01 |
| MSMEG_3382 | transcriptional regulator, ArsR family protein                                      | NA | 1.163 | 1.88E-01 |
| MSMEG_3383 | hypothetical protein                                                                | NA | 1.009 | 9.11E-01 |
| MSMEG_3384 | isoflavone reductase                                                                | NA | 1.228 | 3.04E-02 |
| MSMEG_3385 | hypothetical protein                                                                | NA | 3.328 | 2.97E-01 |
| MSMEG_3386 | shikimate transporter                                                               | NA | 1.014 | 7.05E-01 |
| MSMEG_3387 | aldehyde dehydrogenase (NAD) family protein                                         | NA | 0.881 | 5.55E-01 |
| MSMEG_3388 | S-(hydroxymethyl)glutathione dehydrogenase/class III alcohol dehydrogenase          | NA | 1.418 | 4.05E-01 |
| MSMEG_3389 | putative acetolactate synthase                                                      | NA | 0.896 | 7.14E-01 |
| MSMEG_3390 | enoyl-CoA hydratase                                                                 | NA | 1.139 | 8.54E-01 |
| MSMEG_3391 | L-carnitine dehydratase/bile acid-inducible protein F                               | NA | 0.829 | 3.59E-02 |

|            |                                                                                                      |    |       |          |
|------------|------------------------------------------------------------------------------------------------------|----|-------|----------|
| MSMEG_3392 | acyl-CoA dehydrogenase domain protein                                                                | NA | 0.960 | 8.09E-01 |
| MSMEG_3393 | putative acyl-CoA dehydrogenase                                                                      | NA | 0.665 | 3.22E-03 |
| MSMEG_3394 | cupin domain protein                                                                                 | NA | 0.924 | 1.53E-01 |
| MSMEG_3395 | short chain dehydrogenase                                                                            | NA | 0.965 | 6.66E-01 |
| MSMEG_3396 | transcriptional regulator, lclR family protein                                                       | NA | 1.067 | 1.93E-01 |
| MSMEG_3397 | acetylornithine deacetylase                                                                          | NA | 1.265 | 2.81E-01 |
| MSMEG_3398 | integral membrane transport protein                                                                  | NA | 0.960 | 4.89E-01 |
| MSMEG_3399 | conserved hypothetical protein; this gene contains a frame shift which is not the result of a        | NA | 1.076 | 1.35E-01 |
| MSMEG_3399 | conserved hypothetical protein; this gene contains a frame shift which is not the result of a        | NA | 1.594 | 1.38E-02 |
| MSMEG_3400 | glutamyl-tRNA(Gln) amidotransferase subunit A                                                        | NA | 1.146 | 5.76E-01 |
| MSMEG_3401 | LamB/YcsF family protein                                                                             | NA | 1.218 | 2.22E-01 |
| MSMEG_3402 | cytosine permease, putative                                                                          | NA | 0.941 | 7.64E-01 |
| MSMEG_3403 | formamidase                                                                                          | NA | 0.946 | 2.41E-01 |
| MSMEG_3404 | HNH endonuclease domain protein                                                                      | NA | 1.086 | 3.67E-01 |
| MSMEG_3405 | methylenomycin A resistance protein                                                                  | NA | 1.719 | 2.70E-01 |
| MSMEG_3406 | putative transcriptional regulator, TetR family protein                                              | NA | 1.417 | 1.03E-02 |
| MSMEG_3407 | epoxide hydrolase                                                                                    | NA | 0.935 | 3.73E-01 |
| MSMEG_3408 | conserved hypothetical protein                                                                       | NA | 1.379 | 5.40E-02 |
| MSMEG_3409 | oxidoreductase                                                                                       | NA | 1.700 | 9.67E-02 |
| MSMEG_3410 | transcriptional regulator, TetR family protein                                                       | NA | 1.624 | 1.01E-01 |
| MSMEG_3411 | MOSC domain protein                                                                                  | NA | 1.073 | 4.20E-01 |
| MSMEG_3412 | polysaccharide deacetylase family protein                                                            | NA | 0.996 | 9.18E-01 |
| MSMEG_3413 | MerR-family transcriptional regulator; this gene contains a frame shift which is not the result of a | NA | 0.899 | 4.17E-01 |
| MSMEG_3413 | MerR-family transcriptional regulator; this gene contains a frame shift which is not the result of a | NA | 1.148 | 3.23E-01 |
| MSMEG_3414 | conserved hypothetical protein                                                                       | NA | 1.377 | 8.20E-02 |
| MSMEG_3415 | MarR-family protein regulatory protein                                                               | NA | 1.816 | 1.21E-01 |
| MSMEG_3416 | protein of unknown function DUF6, transmembrane, putative                                            | NA | 1.120 | 3.04E-01 |
| MSMEG_3417 | conserved hypothetical protein                                                                       | NA | 0.952 | 5.92E-01 |
| MSMEG_3418 | conserved hypothetical protein                                                                       | NA | 1.083 | 6.85E-01 |
| MSMEG_3419 | hypothetical protein                                                                                 | NA | 1.196 | 5.61E-01 |
| MSMEG_3420 | gluconate 5-dehydrogenase                                                                            | NA | 1.540 | 3.65E-01 |

|            |                                                               |       |       |          |
|------------|---------------------------------------------------------------|-------|-------|----------|
| MSMEG_3421 | inner membrane metabolite transport protein YdfJ              | NA    | 0.946 | 8.42E-01 |
| MSMEG_3422 | D-isomer specific 2-hydroxyacid dehydrogenase, NAD-binding    | NA    | 0.998 | 9.69E-01 |
| MSMEG_3423 | probable lclR family protein regulator                        | NA    | 0.958 | 7.02E-01 |
| MSMEG_3424 | transcriptional regulator, MerR family protein                | NA    | 1.008 | 9.64E-01 |
| MSMEG_3425 | TetR-family protein transcriptional regulator                 | NA    | 1.261 | 8.12E-02 |
| MSMEG_3426 | short chain dehydrogenase                                     | NA    | 1.469 | 6.69E-02 |
| MSMEG_3427 | metal dependent hydrolase                                     | NA    | 2.274 | 3.69E-01 |
| MSMEG_3428 | conserved hypothetical protein                                | NA    | 1.118 | 4.01E-01 |
| MSMEG_3429 | O-acyl transferase                                            | NA    | 0.996 | 9.66E-01 |
| MSMEG_3430 | SAM-dependent methyltransferase                               | NA    | 0.894 | 5.61E-02 |
| MSMEG_3431 | choline dehydrogenase                                         | NA    | 1.223 | 3.69E-01 |
| MSMEG_3432 | choline dehydrogenase                                         | NA    | 1.100 | 3.64E-01 |
| MSMEG_3434 | peptidyl-prolyl cis-trans isomerase, fkbp-type domain protein | NA    | 1.213 | 3.04E-02 |
| MSMEG_3435 | conserved hypothetical protein                                | NA    | 1.095 | 1.76E-01 |
| MSMEG_3436 | conserved hypothetical protein                                | NA    | 1.040 | 6.83E-01 |
| MSMEG_3437 | putative esterase family protein                              | NA    | 0.987 | 9.40E-01 |
| MSMEG_3438 | hypothetical protein                                          | NA    | 1.012 | 7.56E-01 |
| MSMEG_3439 | hypothetical protein                                          | NA    | 1.385 | 4.76E-01 |
| MSMEG_3440 | L-serine ammonia-lyase                                        | sdaA  | 0.972 | 7.14E-01 |
| MSMEG_3441 | hypothetical protein                                          | NA    | 1.102 | 4.53E-01 |
| MSMEG_3442 | cyclohexadienyl dehydratase                                   | NA    | 1.081 | 7.76E-01 |
| MSMEG_3443 | hypothetical protein                                          | NA    | 1.120 | 6.50E-01 |
| MSMEG_3444 | choline dehydrogenase                                         | NA    | 1.320 | 3.73E-01 |
| MSMEG_3445 | 5,10-methylenetetrahydromethanopterin reductase               | NA    | 1.273 | 7.84E-02 |
| MSMEG_3446 | hypothetical protein                                          | NA    | 1.028 | 9.18E-01 |
| MSMEG_3447 | two-component system response regulator                       | NA    | 1.069 | 6.08E-01 |
| MSMEG_3448 | two-component system sensor kinase                            | NA    | 0.865 | 1.23E-02 |
| MSMEG_3449 | DNA-binding protein                                           | NA    | 1.154 | 4.84E-02 |
| MSMEG_3450 | haloacid dehalogenase, type II                                | dehII | 0.925 | 5.27E-01 |
| MSMEG_3451 | short-chain dehydrogenase/reductase                           | NA    | 1.127 | 1.90E-01 |
| MSMEG_3452 | TetR family protein transcriptional regulator                 | NA    | 1.053 | 7.04E-01 |

|            |                                                                                     |      |       |          |
|------------|-------------------------------------------------------------------------------------|------|-------|----------|
| MSMEG_3453 | hypothetical protein                                                                | NA   | 0.969 | 8.48E-01 |
| MSMEG_3454 | hypothetical protein                                                                | NA   | 0.877 | 1.16E-01 |
| MSMEG_3455 | heat shock protein 15                                                               | hsIR | 1.037 | 3.08E-01 |
| MSMEG_3456 | hydroxylaminobenzene mutase                                                         | NA   | 1.979 | 3.54E-01 |
| MSMEG_3457 | DoxD family protein/pyridine nucleotide-disulfide oxidoreductase                    | NA   | 0.765 | 4.29E-03 |
| MSMEG_3458 | conserved hypothetical protein                                                      | NA   | 1.284 | 3.25E-01 |
| MSMEG_3459 | conserved hypothetical protein                                                      | NA   | 0.831 | 3.62E-03 |
| MSMEG_3460 | ferric uptake regulation protein                                                    | NA   | 0.880 | 3.14E-02 |
| MSMEG_3461 | catalase/peroxidase HPI                                                             | katG | 0.886 | 5.04E-01 |
| MSMEG_3462 | oxidoreductase                                                                      | NA   | 0.964 | 7.77E-01 |
| MSMEG_3463 | putative esterase                                                                   | NA   | 1.164 | 2.77E-01 |
| MSMEG_3464 | alcohol dehydrogenase                                                               | NA   | 1.030 | 7.93E-01 |
| MSMEG_3465 | acyl-CoA synthase                                                                   | NA   | 1.057 | 4.26E-01 |
| MSMEG_3466 | hypothetical protein                                                                | NA   | 1.699 | 3.01E-01 |
| MSMEG_3467 | conserved hypothetical protein                                                      | NA   | 1.298 | 4.44E-02 |
| MSMEG_3468 | AMP-binding enzyme                                                                  | NA   | 1.017 | 8.23E-01 |
| MSMEG_3469 | TetR family protein transcriptional regulator                                       | NA   | 1.097 | 1.83E-01 |
| MSMEG_3470 | NAD-dependent epimerase/dehydratase                                                 | NA   | 1.574 | 6.16E-02 |
| MSMEG_3471 | GTP cyclohydrolase                                                                  | NA   | 0.920 | 3.72E-01 |
| MSMEG_3472 | conserved hypothetical protein                                                      | NA   | 0.815 | 2.57E-01 |
| MSMEG_3473 | uracil phosphoribosyltransferase                                                    | upp  | 0.944 | 5.34E-01 |
| MSMEG_3474 | probable conserved integral membrane protein                                        | NA   | 1.083 | 1.79E-01 |
| MSMEG_3475 | conserved hypothetical protein                                                      | NA   | 1.195 | 5.96E-02 |
| MSMEG_3476 | peptidase, M48 family protein                                                       | NA   | 1.097 | 4.41E-01 |
| MSMEG_3477 | possible inv protein                                                                | NA   | 0.960 | 6.14E-01 |
| MSMEG_3478 | tena/thi-4 family protein                                                           | NA   | 0.910 | 4.17E-02 |
| MSMEG_3479 | thiol peroxidase                                                                    | NA   | 0.677 | 1.62E-04 |
| MSMEG_3480 | streptomycin 6-kinase (Streptidine kinase) (Streptomycin6-phosphotransferase) (APH) | NA   | 0.846 | 9.32E-02 |
| MSMEG_3481 | O-succinylbenzoate synthase                                                         | NA   | 1.225 | 1.19E-01 |
| MSMEG_3482 | hypothetical protein                                                                | NA   | 0.918 | 4.59E-01 |
| MSMEG_3483 | mosc domain protein                                                                 | NA   | 1.112 | 3.14E-01 |

|            |                                                                |      |       |          |
|------------|----------------------------------------------------------------|------|-------|----------|
| MSMEG_3484 | cupin domain protein                                           | NA   | 1.469 | 4.80E-01 |
| MSMEG_3485 | putative ECF sigma factor RpoE1                                | NA   | 3.493 | 4.09E-01 |
| MSMEG_3486 | catalase KatA                                                  | katA | 0.975 | 9.06E-01 |
| MSMEG_3487 | metal-dependent phosphohydrolase                               | NA   | 1.181 | 2.60E-01 |
| MSMEG_3488 | transcriptional regulator, AraC family protein                 | NA   | 1.074 | 6.31E-01 |
| MSMEG_3489 | conserved hypothetical protein, putative                       | NA   | 1.089 | 2.45E-01 |
| MSMEG_3490 | putative membrane acyltransferase                              | NA   | 0.999 | 9.83E-01 |
| MSMEG_3491 | conserved hypothetical protein                                 | NA   | 1.106 | 1.97E-01 |
| MSMEG_3492 | phosphodiesterase                                              | NA   | 1.176 | 3.31E-01 |
| MSMEG_3493 | putative secreted protein                                      | NA   | 0.956 | 4.85E-01 |
| MSMEG_3494 | putative secreted protein                                      | NA   | 0.886 | 1.71E-01 |
| MSMEG_3495 | MmpS5 protein                                                  | NA   | 0.985 | 6.37E-01 |
| MSMEG_3496 | MmpL4 protein                                                  | NA   | 1.117 | 1.29E-01 |
| MSMEG_3497 | transcriptional regulator, ArsR family protein                 | NA   | 1.072 | 1.39E-01 |
| MSMEG_3498 | hypothetical protein                                           | NA   | 1.397 | 3.42E-01 |
| MSMEG_3499 | conserved hypothetical protein                                 | NA   | 1.188 | 2.99E-02 |
| MSMEG_3500 | conserved hypothetical protein                                 | NA   | 1.309 | 5.02E-02 |
| MSMEG_3501 | hypothetical protein                                           | NA   | 0.985 | 6.33E-01 |
| MSMEG_3502 | hypothetical protein                                           | NA   | 1.410 | 1.97E-02 |
| MSMEG_3503 | conserved hypothetical protein                                 | NA   | 0.929 | 1.40E-01 |
| MSMEG_3504 | probable membrane protein                                      | NA   | 0.858 | 3.41E-02 |
| MSMEG_3505 | 6-aminohexanoate-cyclic-dimer hydrolase                        | NA   | 0.956 | 6.15E-01 |
| MSMEG_3506 | putative amino acid decarboxylase, Pyridoxal-dependent protein | NA   | 1.055 | 6.52E-01 |
| MSMEG_3507 | fructose-bisphosphate aldolase class-I                         | NA   | 0.897 | 5.42E-03 |
| MSMEG_3508 | hydrolase, alpha/beta hydrolase fold family protein            | NA   | 0.880 | 1.76E-01 |
| MSMEG_3509 | conserved hypothetical protein                                 | NA   | 0.932 | 1.24E-01 |
| MSMEG_3511 | hydroxylase                                                    | NA   | 1.086 | 9.51E-02 |
| MSMEG_3512 | competence damage-inducible protein A                          | NA   | 0.985 | 6.16E-01 |
| MSMEG_3513 | enhanced intracellular survival protein                        | NA   | 1.349 | 5.66E-02 |
| MSMEG_3514 | hypothetical protein                                           | NA   | 0.809 | 5.02E-03 |
| MSMEG_3515 | 3-alpha-(or 20-beta)-hydroxysteroid dehydrogenase              | NA   | 1.171 | 2.42E-01 |



|            |                                                                                             |      |       |          |
|------------|---------------------------------------------------------------------------------------------|------|-------|----------|
| MSMEG_3516 | conserved hypothetical protein; this gene contains a frame shift which is not the result of | NA   | 0.917 | 3.99E-01 |
| MSMEG_3517 | HAD-superfamily protein subfamily protein IB hydrolase                                      | NA   | 1.007 | 9.35E-01 |
| MSMEG_3518 | conserved hypothetical protein                                                              | NA   | 1.869 | 1.56E-01 |
| MSMEG_3519 | oxidoreductase, 2-nitropropane dioxygenase family protein                                   | NA   | 1.004 | 9.74E-01 |
| MSMEG_3520 | TetR-family protein transcriptional regulator                                               | NA   | 0.855 | 4.38E-02 |
| MSMEG_3521 | molybdopterin oxidoreductase                                                                | NA   | 0.899 | 3.73E-01 |
| MSMEG_3522 | dopamine receptor D4                                                                        | NA   | 0.971 | 8.13E-01 |
| MSMEG_3523 | probable membrane protein                                                                   | NA   | 1.094 | 1.41E-01 |
| MSMEG_3524 | linalool 8-monooxygenase                                                                    | NA   | 1.040 | 7.58E-01 |
| MSMEG_3525 | transcriptional regulator, XRE family protein                                               | NA   | 0.819 | 1.17E-01 |
| MSMEG_3526 | conserved hypothetical protein                                                              | NA   | 0.867 | 3.51E-01 |
| MSMEG_3527 | putative HTH-type transcriptional regulator                                                 | NA   | 1.236 | 3.24E-03 |
| MSMEG_3528 | ErfK/YbiS/YcfS/YnhG family protein                                                          | NA   | 1.130 | 1.23E-01 |
| MSMEG_3529 | fatty acid hydroxylase                                                                      | NA   | 1.091 | 4.20E-01 |
| MSMEG_3530 | conserved hypothetical protein                                                              | NA   | 1.064 | 7.46E-01 |
| MSMEG_3531 | conserved hypothetical protein                                                              | NA   | 0.879 | 1.76E-02 |
| MSMEG_3532 | serine/threonine dehydratase family protein                                                 | NA   | 0.939 | 4.05E-01 |
| MSMEG_3533 | Di-/tripeptide transporter                                                                  | NA   | 1.086 | 3.51E-01 |
| MSMEG_3534 | 4-hydroxybenzoyl-CoA thioesterase                                                           | NA   | 1.007 | 8.85E-01 |
| MSMEG_3535 | agmatinase                                                                                  | speB | 0.959 | 7.90E-01 |
| MSMEG_3536 | sugar transport protein                                                                     | NA   | 1.510 | 3.48E-01 |
| MSMEG_3537 | hypothetical protein                                                                        | NA   | 1.555 | 3.55E-01 |
| MSMEG_3538 | cyclopropane-fatty-acyl-phospholipid synthase 1                                             | NA   | 0.818 | 8.23E-03 |
| MSMEG_3539 | hypothetical protein                                                                        | NA   | 0.823 | 1.79E-01 |
| MSMEG_3540 | conserved hypothetical protein                                                              | NA   | 0.914 | 2.07E-01 |
| MSMEG_3541 | cytochrome C biogenesis protein transmembrane region                                        | NA   | 1.522 | 1.48E-01 |
| MSMEG_3542 | conserved hypothetical protein                                                              | NA   | 0.940 | 3.17E-01 |
| MSMEG_3543 | soluble secreted antigen MPT53                                                              | NA   | 1.147 | 3.16E-01 |
| MSMEG_3544 | conserved hypothetical protein                                                              | NA   | 1.095 | 9.12E-02 |
| MSMEG_3545 | hypothetical protein                                                                        | NA   | 0.998 | 9.49E-01 |
| MSMEG_3546 | conserved hypothetical protein                                                              | NA   | 1.019 | 8.55E-01 |

|            |                                                               |      |       |          |
|------------|---------------------------------------------------------------|------|-------|----------|
| MSMEG_3547 | ectoine/hydroxyectoine ABC transporter solute-binding protein | ehuB | 1.061 | 6.28E-01 |
| MSMEG_3548 | ectoine/hydroxyectoine ABC transporter, permease protein EhuC | ehuC | 0.867 | 3.85E-01 |
| MSMEG_3549 | ectoine/hydroxyectoine ABC transporter, permease protein EhuD | ehuD | 1.007 | 8.67E-01 |
| MSMEG_3550 | ectoine/hydroxyectoine ABC transporter, ATP-binding protein   | ehuA | 0.943 | 3.95E-01 |
| MSMEG_3551 | linalool 8-monooxygenase                                      | NA   | 0.755 | 9.50E-02 |
| MSMEG_3552 | conserved hypothetical protein                                | NA   | 1.333 | 1.06E-02 |
| MSMEG_3553 | dihydropyrimidinase                                           | hydA | 0.889 | 3.26E-01 |
| MSMEG_3554 | N5,N10-methylene- tetrahydromethanopterin reductase           | NA   | 0.737 | 1.06E-01 |
| MSMEG_3555 | hydrolase                                                     | NA   | 1.217 | 6.13E-01 |
| MSMEG_3556 | integral membrane transporter                                 | NA   | 0.785 | 2.33E-02 |
| MSMEG_3557 | amino acid permease-associated region                         | NA   | 1.108 | 3.39E-01 |
| MSMEG_3558 | carboxymethylenebutenolidase                                  | NA   | 1.014 | 9.65E-01 |
| MSMEG_3559 | short chain dehydrogenase                                     | NA   | 1.082 | 6.51E-01 |
| MSMEG_3560 | conserved hypothetical protein                                | NA   | 1.069 | 5.25E-01 |
| MSMEG_3561 | glutamine synthetase, catalytic domain                        | glnA | 0.984 | 8.74E-01 |
| MSMEG_3562 | 4-carboxymuconolactone decarboxylase domain protein           | pcaC | 1.064 | 2.35E-01 |
| MSMEG_3563 | drug transporter                                              | NA   | 1.095 | 4.67E-01 |
| MSMEG_3564 | bacterioferritin                                              | bfr  | 0.825 | 3.73E-02 |
| MSMEG_3565 | hypothetical protein                                          | NA   | 1.488 | 2.35E-01 |
| MSMEG_3566 | FadD16 protein                                                | NA   | 0.985 | 8.94E-01 |
| MSMEG_3567 | enoyl-CoA hydratase                                           | NA   | 1.063 | 1.35E-01 |
| MSMEG_3568 | conserved hypothetical protein                                | NA   | 2.608 | 1.83E-01 |
| MSMEG_3569 | conserved hypothetical protein                                | NA   | 0.910 | 6.20E-03 |
| MSMEG_3570 | conserved hypothetical protein                                | NA   | 1.262 | 2.02E-01 |
| MSMEG_3571 | thioesterase family protein                                   | NA   | 1.163 | 4.69E-02 |
| MSMEG_3572 | transcriptional regulator, TetR family protein                | NA   | 1.387 | 2.22E-01 |
| MSMEG_3573 | integral membrane protein, putative                           | NA   | 1.722 | 7.83E-02 |
| MSMEG_3574 | TPR domain protein                                            | NA   | 0.947 | 6.14E-01 |
| MSMEG_3575 | cytidine/deoxycytidylate deaminase, zinc-binding region       | NA   | 0.956 | 2.17E-01 |
| MSMEG_3576 | alpha-amylase 3                                               | NA   | 0.905 | 1.28E-01 |
| MSMEG_3577 | calpastatin                                                   | NA   | 1.345 | 8.84E-03 |

|            |                                                                                    |     |       |          |
|------------|------------------------------------------------------------------------------------|-----|-------|----------|
| MSMEG_3578 | putative cyclase                                                                   | NA  | 1.003 | 9.71E-01 |
| MSMEG_3579 | probable conserved transmembrane protein                                           | NA  | 0.823 | 2.08E-01 |
| MSMEG_3580 | antigen 85-C                                                                       | NA  | 0.754 | 1.10E-02 |
| MSMEG_3581 | FabG protein                                                                       | NA  | 1.899 | 2.53E-01 |
| MSMEG_3582 | ATP-dependent protease La                                                          | lon | 2.130 | 1.96E-01 |
| MSMEG_3583 | monooxygenase                                                                      | NA  | 1.575 | 1.04E-01 |
| MSMEG_3584 | membrane protein, MmpL family protein                                              | NA  | 1.065 | 5.66E-01 |
| MSMEG_3585 | MmpS2 protein                                                                      | NA  | 1.183 | 1.50E-01 |
| MSMEG_3586 | major facilitator family protein transporter                                       | NA  | 0.833 | 5.77E-01 |
| MSMEG_3587 | D-serine/D-alanine/glycine transporter                                             | NA  | 1.097 | 3.77E-01 |
| MSMEG_3588 | hypothetical protein                                                               | NA  | 0.994 | 9.63E-01 |
| MSMEG_3589 | conserved hypothetical protein                                                     | NA  | 1.228 | 4.02E-01 |
| MSMEG_3590 | conserved hypothetical protein                                                     | NA  | 0.957 | 7.93E-01 |
| MSMEG_3591 | conserved hypothetical protein                                                     | NA  | 1.059 | 7.77E-01 |
| MSMEG_3592 | hypothetical protein                                                               | NA  | 0.960 | 4.10E-01 |
| MSMEG_3593 | conserved hypothetical protein                                                     | NA  | 1.036 | 6.48E-01 |
| MSMEG_3594 | anthranilate dioxygenase reductase                                                 | NA  | 1.580 | 4.53E-01 |
| MSMEG_3595 | conserved hypothetical protein                                                     | NA  | 0.870 | 2.88E-01 |
| MSMEG_3596 | ATPase                                                                             | NA  | 0.887 | 1.31E-01 |
| MSMEG_3596 | ATPase                                                                             | NA  | 1.098 | 1.72E-01 |
| MSMEG_3598 | periplasmic sugar-binding proteins                                                 | NA  | 0.784 | 4.65E-03 |
| MSMEG_3599 | sugar-binding transcriptional regulator, LacI family protein                       | NA  | 0.702 | 1.01E-02 |
| MSMEG_3600 | hypothetical protein                                                               | NA  | 1.021 | 7.80E-01 |
| MSMEG_3601 | ribose/xylose/arabinose/galactoside ABC-type transport systems, permease component | NA  | 0.656 | 6.94E-03 |
| MSMEG_3602 | ribose transport ATP-binding protein RbsA                                          | NA  | 0.822 | 2.29E-01 |
| MSMEG_3603 | oxidoreductase, zinc-binding dehydrogenase family protein                          | NA  | 0.942 | 8.88E-01 |
| MSMEG_3604 | sorbitol utilization protein SOU2                                                  | NA  | 0.759 | 2.40E-01 |
| MSMEG_3605 | sorbitol dehydrogenase                                                             | NA  | 0.846 | 6.63E-02 |
| MSMEG_3606 | transcriptional regulator                                                          | NA  | 0.896 | 3.17E-01 |
| MSMEG_3607 | short chain dehydrogenase                                                          | NA  | 0.889 | 1.52E-01 |
| MSMEG_3608 | acetyl-CoA acetyltransferase                                                       | NA  | 0.918 | 2.04E-01 |

|            |                                                               |      |       |          |
|------------|---------------------------------------------------------------|------|-------|----------|
| MSMEG_3609 | hydride transferase 1                                         | NA   | 1.092 | 3.52E-01 |
| MSMEG_3610 | conserved hypothetical protein                                | NA   | 1.161 | 3.85E-01 |
| MSMEG_3611 | D-xylulose 5-phosphate/D-fructose 6-phosphate phosphoketolase | xfp  | 0.861 | 3.68E-01 |
| MSMEG_3612 | probable conserved integral membrane protein                  | NA   | 0.954 | 6.26E-01 |
| MSMEG_3613 | conserved hypothetical protein                                | NA   | 1.105 | 4.15E-01 |
| MSMEG_3614 | hypothetical protein                                          | NA   | 1.384 | 3.40E-02 |
| MSMEG_3615 | zinc-binding alcohol dehydrogenase family protein             | NA   | 0.988 | 9.00E-01 |
| MSMEG_3616 | integral membrane protein                                     | NA   | 0.839 | 2.77E-04 |
| MSMEG_3617 | hypothetical protein                                          | NA   | 1.017 | 8.99E-01 |
| MSMEG_3618 | alanine and proline-rich secreted protein apa                 | NA   | 0.896 | 4.38E-02 |
| MSMEG_3619 | short chain dehydrogenase                                     | NA   | 0.995 | 9.40E-01 |
| MSMEG_3620 | conserved hypothetical protein                                | NA   | 0.855 | 7.78E-02 |
| MSMEG_3621 | NADH dehydrogenase                                            | ndh  | 1.152 | 2.69E-01 |
| MSMEG_3622 | conserved hypothetical protein                                | NA   | 1.106 | 6.98E-01 |
| MSMEG_3623 | urease accessory protein UreG                                 | ureG | 0.714 | 1.93E-02 |
| MSMEG_3624 | urease accessory protein uref                                 | NA   | 1.056 | 7.87E-01 |
| MSMEG_3625 | urease, alpha subunit                                         | ureC | 0.807 | 1.93E-01 |
| MSMEG_3626 | urease, beta subunit                                          | ureB | 0.987 | 9.04E-01 |
| MSMEG_3627 | urease, gamma subunit                                         | ureA | 0.904 | 7.04E-03 |
| MSMEG_3628 | ComA operon protein 2                                         | NA   | 0.966 | 6.29E-01 |
| MSMEG_3629 | conserved hypothetical protein                                | NA   | 1.562 | 3.37E-01 |
| MSMEG_3630 | transcriptional repressor, CopY family protein                | NA   | 1.222 | 3.08E-01 |
| MSMEG_3631 | integral membrane protein                                     | NA   | 1.197 | 5.02E-02 |
| MSMEG_3632 | 6-phosphogluconate dehydrogenase, decarboxylating             | gnd  | 0.933 | 2.14E-01 |
| MSMEG_3633 | ferric cations import ATP-binding protein FbpC                | NA   | 1.190 | 5.88E-01 |
| MSMEG_3634 | IMP dehydrogenase family protein                              | NA   | 0.969 | 7.21E-01 |
| MSMEG_3635 | iron(III)-transport system permease protein SfuB              | NA   | 0.946 | 5.01E-01 |
| MSMEG_3636 | ferric iron-binding periplasmic protein of ABC transporter    | NA   | 0.966 | 5.10E-01 |
| MSMEG_3637 | CBS domain protein                                            | NA   | 1.141 | 2.44E-01 |
| MSMEG_3638 | CBS domain protein                                            | NA   | 1.219 | 5.28E-02 |
| MSMEG_3639 | conserved hypothetical protein                                | NA   | 0.931 | 4.06E-01 |

|            |                                                                          |      |       |          |
|------------|--------------------------------------------------------------------------|------|-------|----------|
| MSMEG_3640 | malate synthase G                                                        | glcB | 0.953 | 4.12E-02 |
| MSMEG_3641 | conserved hypothetical protein                                           | NA   | 1.014 | 8.87E-01 |
| MSMEG_3642 | glycine dehydrogenase                                                    | gcvP | 1.417 | 1.70E-01 |
| MSMEG_3643 | hypothetical protein                                                     | NA   | 1.474 | 2.35E-01 |
| MSMEG_3644 | transcriptional regulator, MerR family protein                           | NA   | 0.865 | 9.49E-02 |
| MSMEG_3645 | conserved hypothetical protein                                           | NA   | 1.089 | 8.68E-02 |
| MSMEG_3646 | transcriptional regulator, MerR family protein                           | NA   | 1.104 | 2.67E-01 |
| MSMEG_3647 | forkhead-associated protein                                              | NA   | 1.117 | 2.65E-01 |
| MSMEG_3648 | glycine cleavage system H protein                                        | gcvH | 0.911 | 2.14E-01 |
| MSMEG_3649 | conserved hypothetical protein                                           | NA   | 1.025 | 7.58E-01 |
| MSMEG_3650 | integral membrane protein                                                | NA   | 1.073 | 3.29E-01 |
| MSMEG_3651 | membrane associated protein                                              | NA   | 1.048 | 3.27E-01 |
| MSMEG_3652 | CDP-diacylglycerol-glycerol-3-phosphate                                  | NA   | 0.930 | 1.88E-01 |
| MSMEG_3653 | hypothetical protein                                                     | NA   | 1.170 | 4.15E-01 |
| MSMEG_3654 | ATPase SecA2                                                             | NA   | 1.088 | 2.87E-01 |
| MSMEG_3655 | ABC transporter, permease/ATP-binding protein                            | NA   | 0.947 | 3.06E-01 |
| MSMEG_3656 | ABC transporter, permease/ATP-binding protein                            | NA   | 1.117 | 2.74E-01 |
| MSMEG_3657 | succinate dehydrogenase                                                  | NA   | 0.827 | 3.51E-03 |
| MSMEG_3658 | conserved hypothetical protein                                           | NA   | 0.952 | 3.56E-01 |
| MSMEG_3659 | TetR-family protein transcriptional regulator                            | NA   | 1.425 | 9.92E-03 |
| MSMEG_3660 | conserved hypothetical protein TIGR00026                                 | NA   | 1.219 | 1.96E-01 |
| MSMEG_3661 | conserved hypothetical protein                                           | NA   | 1.081 | 4.60E-01 |
| MSMEG_3662 | mannose-binding lectin                                                   | NA   | 0.863 | 6.94E-02 |
| MSMEG_3663 | oxidoreductase                                                           | NA   | 1.098 | 3.94E-01 |
| MSMEG_3664 | transporter, monovalent cation:proton antiporter-2 (CPA2) family protein | NA   | 1.078 | 8.09E-01 |
| MSMEG_3665 | TrkA domain protein                                                      | NA   | 1.012 | 8.68E-01 |
| MSMEG_3666 | C-5 sterol desaturase                                                    | NA   | 0.837 | 3.24E-02 |
| MSMEG_3667 | para-nitrobenzyl esterase                                                | NA   | 0.779 | 1.60E-03 |
| MSMEG_3668 | acyl-CoA dehydrogenase                                                   | NA   | 1.255 | 3.77E-01 |
| MSMEG_3669 | conserved hypothetical protein                                           | NA   | 1.020 | 5.46E-01 |
| MSMEG_3670 | transporter, small multidrug resistance (SMR) family protein             | NA   | 1.256 | 2.38E-01 |

|            |                                                                                           |      |       |          |
|------------|-------------------------------------------------------------------------------------------|------|-------|----------|
| MSMEG_3671 | integral membrane protein                                                                 | NA   | 1.051 | 4.76E-01 |
| MSMEG_3672 | transporter, small multidrug resistance (SMR) family protein                              | NA   | 1.260 | 1.60E-01 |
| MSMEG_3673 | 4-alpha-glucanotransferase                                                                | malQ | 1.079 | 7.14E-01 |
| MSMEG_3674 | hypothetical protein                                                                      | NA   | 0.919 | 7.97E-02 |
| MSMEG_3675 | metal-dependent hydrolase                                                                 | NA   | 1.074 | 1.43E-02 |
| MSMEG_3676 | phenoxybenzoate dioxygenase beta subunit                                                  | NA   | 1.283 | 2.94E-01 |
| MSMEG_3677 | serine/threonine protein kinase                                                           | NA   | 0.941 | 1.38E-01 |
| MSMEG_3678 | hypothetical protein                                                                      | NA   | 1.240 | 1.41E-01 |
| MSMEG_3679 | phosphohydrolase                                                                          | NA   | 1.210 | 3.47E-01 |
| MSMEG_3680 | hypothetical protein                                                                      | NA   | 3.220 | 3.76E-03 |
| MSMEG_3681 | conserved hypothetical protein                                                            | NA   | 1.075 | 3.70E-01 |
| MSMEG_3682 | conserved hypothetical protein                                                            | NA   | 1.549 | 2.56E-01 |
| MSMEG_3683 | conserved hypothetical protein                                                            | NA   | 1.149 | 7.16E-02 |
| MSMEG_3684 | nuclear transport factor 2 (NTF2) domain family protein                                   | NA   | 1.223 | 3.54E-02 |
| MSMEG_3685 | conserved hypothetical protein                                                            | NA   | 0.885 | 2.09E-01 |
| MSMEG_3686 | conserved hypothetical protein                                                            | NA   | 1.141 | 4.71E-02 |
| MSMEG_3687 | medium chain acyl-CoA synthetase                                                          | NA   | 1.091 | 1.63E-02 |
| MSMEG_3688 | conserved hypothetical protein                                                            | NA   | 0.869 | 3.53E-02 |
| MSMEG_3689 | sodium:solute symporter                                                                   | NA   | 1.025 | 7.16E-01 |
| MSMEG_3690 | transcriptional regulatory protein; this gene contains a frame shift which is not the res | NA   | 1.050 | 4.92E-01 |
| MSMEG_3691 | galactose-1-phosphate uridylyltransferase                                                 | galT | 1.120 | 3.50E-01 |
| MSMEG_3692 | galactokinase                                                                             | galK | 1.280 | 4.84E-02 |
| MSMEG_3693 | cytochrome P450 monooxygenase                                                             | NA   | 1.176 | 4.95E-01 |
| MSMEG_3694 | feruloyl-CoA synthetase                                                                   | NA   | 1.020 | 8.70E-01 |
| MSMEG_3695 | conserved hypothetical protein                                                            | NA   | 1.153 | 2.61E-01 |
| MSMEG_3698 | hypothetical protein                                                                      | NA   | 1.052 | 5.87E-01 |
| MSMEG_3699 | conserved hypothetical protein                                                            | NA   | 1.532 | 3.53E-02 |
| MSMEG_3700 | peroxidase                                                                                | NA   | 1.069 | 6.06E-01 |
| MSMEG_3701 | conserved hypothetical protein                                                            | NA   | 0.989 | 9.44E-01 |
| MSMEG_3703 | hypothetical protein                                                                      | NA   | 0.766 | 5.52E-02 |
| MSMEG_3703 | hypothetical protein                                                                      | NA   | 1.789 | 1.86E-01 |

|            |                                                                                      |      |       |          |
|------------|--------------------------------------------------------------------------------------|------|-------|----------|
| MSMEG_3704 | 3-alpha-hydroxysteroid dehydrogenase                                                 | NA   | 0.917 | 1.20E-02 |
| MSMEG_3705 | major facilitator superfamily protein MFS_1                                          | NA   | 0.794 | 3.46E-02 |
| MSMEG_3706 | isocitrate lyase                                                                     | aceA | 1.238 | 6.10E-01 |
| MSMEG_3707 | conserved hypothetical protein                                                       | NA   | 0.962 | 8.82E-01 |
| MSMEG_3708 | catalase                                                                             | NA   | 0.977 | 8.26E-01 |
| MSMEG_3709 | conserved hypothetical protein                                                       | NA   | 1.053 | 6.62E-01 |
| MSMEG_3710 | cytochrome b561 family protein                                                       | NA   | 1.064 | 5.13E-01 |
| MSMEG_3711 | hypothetical protein                                                                 | NA   | 1.244 | 4.41E-01 |
| MSMEG_3712 | hypothetical protein                                                                 | NA   | 1.988 | 3.24E-01 |
| MSMEG_3713 | hypothetical protein                                                                 | NA   | 1.372 | 1.04E-01 |
| MSMEG_3714 | conserved hypothetical protein                                                       | NA   | 1.023 | 6.64E-01 |
| MSMEG_3715 | linear gramicidin synthetase subunit C                                               | NA   | 1.057 | 3.17E-01 |
| MSMEG_3716 | hypothetical protein                                                                 | NA   | 1.116 | 7.62E-01 |
| MSMEG_3717 | short-chain dehydrogenase/reductase SDR; this gene contains a frame shift which is n | NA   | 0.952 | 3.11E-01 |
| MSMEG_3717 | short-chain dehydrogenase/reductase SDR; this gene contains a frame shift which is n | NA   | 1.859 | 2.95E-01 |
| MSMEG_3718 | conserved hypothetical protein                                                       | NA   | 1.070 | 5.21E-01 |
| MSMEG_3719 | sodium/calcium exchanger protein                                                     | NA   | 0.932 | 5.13E-01 |
| MSMEG_3720 | recombination activating protein 1                                                   | NA   | 0.730 | 2.60E-02 |
| MSMEG_3721 | coenzyme PQQ biosynthesis protein E                                                  | pqqE | 1.002 | 9.47E-01 |
| MSMEG_3722 | bifunctional coenzyme PQQ synthesis protein C/D                                      | NA   | 1.030 | 6.07E-01 |
| MSMEG_3723 | coenzyme PQQ biosynthesis protein C                                                  | pqqC | 0.939 | 8.31E-01 |
| MSMEG_3724 | coenzyme PQQ biosynthesis protein B                                                  | pqqB | 1.443 | 1.85E-01 |
| MSMEG_3725 | coenzyme PQQ biosynthesis protein A                                                  | pqqA | 0.852 | 6.53E-02 |
| MSMEG_3726 | alcohol dehydrogenase                                                                | NA   | 0.935 | 5.42E-01 |
| MSMEG_3727 | hypothetical protein                                                                 | NA   | 0.715 | 9.01E-03 |
| MSMEG_3728 | hypothetical protein                                                                 | NA   | 1.004 | 9.83E-01 |
| MSMEG_3729 | catalase/peroxidase HPI                                                              | katG | 0.997 | 9.33E-01 |
| MSMEG_3730 | helix-turn-helix, Fis-type, putative                                                 | NA   | 1.248 | 4.65E-01 |
| MSMEG_3731 | dipeptidase 2                                                                        | NA   | 1.154 | 4.50E-01 |
| MSMEG_3732 | hypothetical protein                                                                 | NA   | 0.998 | 9.76E-01 |
| MSMEG_3733 | conserved hypothetical protein                                                       | NA   | 0.876 | 2.59E-02 |

|            |                                                                                          |      |       |          |
|------------|------------------------------------------------------------------------------------------|------|-------|----------|
| MSMEG_3735 | YtnM protein                                                                             | NA   | 1.312 | 4.81E-02 |
| MSMEG_3736 | hypothetical protein                                                                     | NA   | 1.696 | 6.35E-02 |
| MSMEG_3737 | integral membrane protein                                                                | NA   | 1.327 | 5.97E-02 |
| MSMEG_3738 | GTP-binding protein EngA                                                                 | NA   | 1.141 | 8.28E-02 |
| MSMEG_3739 | cytidylate kinase                                                                        | cmk  | 1.111 | 2.77E-01 |
| MSMEG_3740 | ribosomal large subunit pseudouridine synthase B                                         | rluB | 1.142 | 1.86E-02 |
| MSMEG_3741 | transcriptional regulator                                                                | NA   | 1.005 | 8.26E-01 |
| MSMEG_3742 | segregation and condensation protein A                                                   | scpA | 1.094 | 1.80E-01 |
| MSMEG_3743 | SpoOJ regulator protein                                                                  | soj  | 2.384 | 3.68E-01 |
| MSMEG_3744 | tyrosine recombinase XerD                                                                | xerD | 1.305 | 3.84E-01 |
| MSMEG_3745 | MutT/nudix family protein                                                                | NA   | 1.060 | 1.20E-01 |
| MSMEG_3746 | CTP synthase                                                                             | pyrG | 1.048 | 1.88E-01 |
| MSMEG_3747 | conserved hypothetical protein; this gene contains a frame shift which is not the result | NA   | 1.024 | 7.64E-01 |
| MSMEG_3748 | thiamin pyrophosphokinase, catalytic domain protein                                      | NA   | 1.029 | 8.04E-01 |
| MSMEG_3749 | DNA repair protein RecN; this gene contains a frame shift which is not the result of sec | NA   | 0.922 | 4.02E-01 |
| MSMEG_3749 | DNA repair protein RecN; this gene contains a frame shift which is not the result of sec | NA   | 1.120 | 5.20E-02 |
| MSMEG_3750 | inorganic polyphosphate/ATP-NAD kinase (Poly(P)/ATP NADkinase)                           | NA   | 0.927 | 5.77E-02 |
| MSMEG_3751 | hemolysin A                                                                              | NA   | 1.078 | 3.88E-01 |
| MSMEG_3752 | conserved hypothetical protein                                                           | NA   | 1.156 | 9.14E-02 |
| MSMEG_3753 | hydrolase                                                                                | NA   | 1.124 | 3.05E-01 |
| MSMEG_3754 | TPR-repeat-containing protein                                                            | NA   | 1.449 | 1.47E-01 |
| MSMEG_3758 | tyrosyl-tRNA synthetase                                                                  | tyrS | 0.969 | 2.88E-01 |
| MSMEG_3759 | 3-methyladenine DNA glycosylase                                                          | NA   | 1.077 | 6.24E-01 |
| MSMEG_3760 | conserved hypothetical protein                                                           | NA   | 1.025 | 5.63E-01 |
| MSMEG_3761 | putative Clp protease subunit                                                            | NA   | 1.007 | 9.36E-01 |
| MSMEG_3762 | ABC transporter ATP-binding protein                                                      | NA   | 1.031 | 7.35E-01 |
| MSMEG_3763 | ABC transporter efflux protein, DrrB family protein                                      | NA   | 0.965 | 8.85E-01 |
| MSMEG_3764 | conserved hypothetical protein                                                           | NA   | 1.044 | 1.68E-01 |
| MSMEG_3765 | transcriptional regulator                                                                | NA   | 1.183 | 2.51E-02 |
| MSMEG_3766 | hypothetical protein                                                                     | NA   | 1.059 | 8.67E-02 |
| MSMEG_3767 | acyl-CoA synthase                                                                        | NA   | 1.135 | 4.20E-01 |



|            |                                                                                               |      |       |          |
|------------|-----------------------------------------------------------------------------------------------|------|-------|----------|
| MSMEG_3768 | macrolide-transport ATP-binding protein abc transporter                                       | NA   | 0.970 | 5.85E-01 |
| MSMEG_3769 | argininosuccinate lyase                                                                       | argH | 1.154 | 1.71E-01 |
| MSMEG_3770 | argininosuccinate synthase                                                                    | argG | 0.965 | 6.48E-01 |
| MSMEG_3771 | arginine repressor                                                                            | argR | 1.096 | 3.45E-01 |
| MSMEG_3772 | ornithine carbamoyltransferase                                                                | argF | 1.064 | 5.86E-01 |
| MSMEG_3773 | acetylornithine aminotransferase                                                              | argD | 1.184 | 1.55E-01 |
| MSMEG_3774 | acetylglutamate kinase                                                                        | argB | 1.091 | 3.62E-01 |
| MSMEG_3775 | arginine biosynthesis bifunctional protein ArgJ                                               | argJ | 1.144 | 1.10E-01 |
| MSMEG_3776 | N-acetyl-gamma-glutamyl-phosphate reductase                                                   | argC | 1.159 | 1.17E-01 |
| MSMEG_3777 | phenylalanyl-tRNA synthetase, beta subunit                                                    | pheT | 1.144 | 1.54E-01 |
| MSMEG_3778 | phenylalanyl-tRNA synthetase, alpha subunit                                                   | pheS | 1.106 | 3.74E-01 |
| MSMEG_3779 | conserved hypothetical protein; this gene contains a frame shift which is not the result of a | NA   | 1.230 | 1.17E-01 |
| MSMEG_3780 | adenylate and Guanylate cyclase catalytic domain protein                                      | NA   | 1.030 | 7.12E-01 |
| MSMEG_3781 | conserved hypothetical protein                                                                | NA   | 0.991 | 7.71E-01 |
| MSMEG_3782 | endoribonuclease L-PSP, putative                                                              | NA   | 0.967 | 5.97E-01 |
| MSMEG_3783 | acyl-CoA dehydrogenase                                                                        | NA   | 1.153 | 3.12E-01 |
| MSMEG_3784 | transcriptional regulator, IclR family protein                                                | NA   | 1.123 | 6.52E-01 |
| MSMEG_3785 | PfkB-family protein carbohydrate kinase                                                       | NA   | 1.441 | 5.01E-01 |
| MSMEG_3786 | D-amino acid deaminase                                                                        | NA   | 0.842 | 4.01E-01 |
| MSMEG_3787 | D-aminoacylase                                                                                | NA   | 0.951 | 6.80E-01 |
| MSMEG_3788 | 2-dehydro-3-deoxyphosphogluconate aldolase/4-hydroxy-2-oxoglutarate aldolase                  | eda  | 1.078 | 4.03E-01 |
| MSMEG_3789 | inner membrane permease YgbN                                                                  | NA   | 1.153 | 4.07E-01 |
| MSMEG_3790 | RNA methyltransferase, TrmH family protein                                                    | NA   | 1.285 | 9.53E-02 |
| MSMEG_3791 | ribosomal protein L20                                                                         | rpIT | 1.208 | 8.79E-03 |
| MSMEG_3792 | ribosomal protein L35                                                                         | rpml | 1.092 | 4.00E-01 |
| MSMEG_3793 | translation initiation factor IF-3                                                            | infC | 0.944 | 5.26E-01 |
| MSMEG_3794 | hypothetical protein                                                                          | NA   | 0.908 | 4.19E-01 |
| MSMEG_3795 | conserved hypothetical protein                                                                | NA   | 1.143 | 4.43E-01 |
| MSMEG_3796 | lysyl-tRNA synthetase                                                                         | NA   | 0.981 | 8.70E-01 |
| MSMEG_3797 | putative esterase family protein                                                              | NA   | 1.155 | 2.40E-01 |
| MSMEG_3798 | conserved hypothetical protein                                                                | NA   | 1.101 | 2.81E-01 |

|            |                                                                    |      |       |          |
|------------|--------------------------------------------------------------------|------|-------|----------|
| MSMEG_3799 | conserved hypothetical protein                                     | NA   | 1.218 | 1.35E-01 |
| MSMEG_3800 | conserved hypothetical protein                                     | NA   | 1.358 | 3.02E-01 |
| MSMEG_3801 | conserved hypothetical protein                                     | NA   | 1.249 | 4.27E-01 |
| MSMEG_3802 | tetratricopeptide repeat family protein                            | NA   | 1.097 | 2.01E-01 |
| MSMEG_3803 | lipoprotein LpqH                                                   | NA   | 1.067 | 2.52E-01 |
| MSMEG_3804 | conserved hypothetical protein                                     | NA   | 0.984 | 7.19E-01 |
| MSMEG_3805 | oxidoreductase, short chain dehydrogenase/reductase family protein | NA   | 1.125 | 3.37E-01 |
| MSMEG_3806 | conserved hypothetical protein                                     | NA   | 1.020 | 5.97E-01 |
| MSMEG_3807 | TetR-type regulator                                                | NA   | 1.049 | 3.38E-01 |
| MSMEG_3808 | excinuclease ABC, A subunit                                        | uvrA | 1.266 | 5.96E-02 |
| MSMEG_3809 | conserved hypothetical protein                                     | NA   | 1.018 | 6.09E-01 |
| MSMEG_3810 | hydrolase                                                          | NA   | 1.134 | 5.20E-01 |
| MSMEG_3811 | universal stress protein family protein, putative                  | NA   | 1.273 | 4.32E-03 |
| MSMEG_3812 | acyl-CoA thioesterase                                              | NA   | 1.208 | 2.89E-02 |
| MSMEG_3813 | NAD-dependent epimerase/dehydratase                                | NA   | 1.066 | 2.79E-01 |
| MSMEG_3815 | possible drug efflux membrane protein                              | NA   | 1.021 | 8.03E-01 |
| MSMEG_3816 | excinuclease ABC, B subunit                                        | uvrB | 0.958 | 2.84E-01 |
| MSMEG_3817 | conserved hypothetical protein                                     | NA   | 0.939 | 6.78E-01 |
| MSMEG_3818 | thermolabile glutaminase                                           | NA   | 1.122 | 2.61E-01 |
| MSMEG_3819 | conserved hypothetical protein                                     | NA   | 1.007 | 7.67E-01 |
| MSMEG_3820 | hypothetical protein                                               | NA   | 0.938 | 3.55E-01 |
| MSMEG_3821 | amino acid permease                                                | NA   | 0.823 | 3.70E-01 |
| MSMEG_3822 | regulatory protein GntR, HTH                                       | NA   | 1.074 | 2.17E-01 |
| MSMEG_3823 | 3-oxoacyl-[acyl-carrier-protein] reductase                         | NA   | 1.156 | 9.88E-02 |
| MSMEG_3824 | conserved hypothetical protein                                     | NA   | 1.055 | 7.94E-01 |
| MSMEG_3825 | 3-oxoacyl-[acyl-carrier-protein] reductase                         | NA   | 1.307 | 2.76E-01 |
| MSMEG_3826 | hypothetical protein                                               | NA   | 1.441 | 2.91E-01 |
| MSMEG_3827 | glutamine synthetase                                               | NA   | 2.295 | 4.02E-01 |
| MSMEG_3828 | glutamine synthetase                                               | NA   | 2.838 | 4.23E-01 |
| MSMEG_3829 | esterase                                                           | NA   | 0.740 | 4.07E-02 |
| MSMEG_3830 | 3-oxoacyl-[acyl-carrier-protein] reductase                         | NA   | 0.936 | 3.31E-01 |

|            |                                                                                        |    |       |          |
|------------|----------------------------------------------------------------------------------------|----|-------|----------|
| MSMEG_3831 | dephospho-CoA kinase; this gene contains a frame shift which is not the result of sequ | NA | 1.143 | 2.83E-01 |
| MSMEG_3832 | 4-hydroxyacetophenone monooxygenase                                                    | NA | 1.019 | 5.49E-01 |
| MSMEG_3833 | 30S ribosomal protein S1                                                               | NA | 0.793 | 4.74E-02 |
| MSMEG_3834 | putative TetR-family protein transcriptional regulator                                 | NA | 1.193 | 1.60E-02 |
| MSMEG_3835 | YesF protein                                                                           | NA | 1.501 | 1.76E-02 |
| MSMEG_3836 | conserved hypothetical protein                                                         | NA | 1.338 | 6.11E-02 |
| MSMEG_3837 | conserved hypothetical protein                                                         | NA | 1.045 | 6.82E-01 |
| MSMEG_3838 | integral membrane protein                                                              | NA | 0.909 | 6.14E-03 |
| MSMEG_3839 | DNA polymerase I                                                                       | NA | 1.045 | 4.37E-01 |
| MSMEG_3840 | LysR-family protein transcriptional regulator                                          | NA | 1.568 | 1.17E-02 |
| MSMEG_3841 | monooxygenase, FAD-binding                                                             | NA | 1.096 | 4.06E-01 |
| MSMEG_3842 | putative esterase                                                                      | NA | 1.102 | 2.10E-01 |
| MSMEG_3843 | conserved hypothetical protein                                                         | NA | 0.999 | 9.94E-01 |
| MSMEG_3844 | lipid-transfer protein                                                                 | NA | 1.152 | 8.11E-02 |
| MSMEG_3845 | conserved domain protein                                                               | NA | 1.397 | 2.45E-01 |
| MSMEG_3846 | phosphotransferase enzyme family protein                                               | NA | 0.795 | 2.49E-01 |
| MSMEG_3847 | copper methylamine oxidase                                                             | NA | 0.851 | 7.97E-02 |
| MSMEG_3848 | para-nitrobenzyl esterase                                                              | NA | 0.964 | 4.81E-01 |
| MSMEG_3849 | hypothetical protein                                                                   | NA | 1.059 | 5.28E-01 |
| MSMEG_3850 | alkanesulfonate monooxygenase family protein                                           | NA | 1.020 | 8.86E-01 |
| MSMEG_3851 | Lppl protein                                                                           | NA | 0.865 | 5.50E-02 |
| MSMEG_3852 | aliphatic sulfonate binding protein                                                    | NA | 1.060 | 6.79E-01 |
| MSMEG_3853 | putative aliphatic sulfonates transport ATP-binding protein SsuB                       | NA | 1.155 | 3.56E-01 |
| MSMEG_3854 | putative aliphatic sulfonates transport permease protein SsuC                          | NA | 1.051 | 4.90E-01 |
| MSMEG_3855 | hypothetical protein                                                                   | NA | 0.708 | 6.42E-02 |
| MSMEG_3856 | transcriptional regulator, CadC                                                        | NA | 1.073 | 3.56E-01 |
| MSMEG_3857 | conserved hypothetical protein                                                         | NA | 1.012 | 5.74E-01 |
| MSMEG_3858 | conserved hypothetical protein                                                         | NA | 0.965 | 8.39E-01 |
| MSMEG_3859 | glycosyl transferase, group 2 family protein                                           | NA | 1.083 | 1.25E-01 |
| MSMEG_3860 | polyprenol-monophosphomannose synthase Ppm1                                            | NA | 1.038 | 7.04E-01 |
| MSMEG_3861 | amidohydrolase 3                                                                       | NA | 0.969 | 7.61E-01 |

|            |                                                                                          |      |       |          |
|------------|------------------------------------------------------------------------------------------|------|-------|----------|
| MSMEG_3862 | FxsA cytoplasmic membrane protein                                                        | NA   | 0.788 | 2.30E-04 |
| MSMEG_3863 | pyridoxamine 5'-phosphate oxidase family protein                                         | NA   | 0.881 | 1.42E-02 |
| MSMEG_3864 | cobaltochelataase, CobN subunit                                                          | cobN | 1.001 | 9.83E-01 |
| MSMEG_3865 | hypothetical protein                                                                     | NA   | 1.068 | 7.89E-01 |
| MSMEG_3866 | conserved hypothetical protein                                                           | NA   | 1.016 | 9.10E-01 |
| MSMEG_3867 | ATPase family protein associated with various cellular activities (AAA)                  | NA   | 0.989 | 8.77E-01 |
| MSMEG_3868 | conserved hypothetical protein                                                           | NA   | 0.977 | 7.85E-01 |
| MSMEG_3869 | conserved hypothetical protein                                                           | NA   | 1.066 | 3.01E-01 |
| MSMEG_3870 | alpha-ketoglutarate-dependent taurine dioxygenase                                        | NA   | 1.129 | 5.29E-01 |
| MSMEG_3871 | precorrin-3B synthase                                                                    | cobG | 1.152 | 2.19E-01 |
| MSMEG_3872 | precorrin-8X methylmutase                                                                | NA   | 1.121 | 3.12E-01 |
| MSMEG_3873 | cobalamin biosynthesis protein cobIJ                                                     | NA   | 1.143 | 1.34E-01 |
| MSMEG_3874 | transcriptional regulator, TetR family protein                                           | NA   | 1.291 | 2.04E-01 |
| MSMEG_3875 | precorrin-6x reductase                                                                   | cobK | 1.006 | 9.64E-01 |
| MSMEG_3876 | phosphotransferase enzyme family protein, putative                                       | NA   | 0.990 | 9.48E-01 |
| MSMEG_3877 | precorrin-4 C11-methyltransferase                                                        | cobM | 0.923 | 2.49E-01 |
| MSMEG_3878 | precorrin-6Y C5,15-methyltransferase (decarboxylating)                                   | cobL | 1.063 | 3.12E-01 |
| MSMEG_3879 | short chain dehydrogenase                                                                | NA   | 1.168 | 7.58E-03 |
| MSMEG_3880 | nitrilase/cyanide hydratase and apolipoprotein N-acyltransferase                         | NA   | 1.008 | 9.13E-01 |
| MSMEG_3881 | proline dipeptidase                                                                      | NA   | 0.918 | 4.84E-02 |
| MSMEG_3882 | glyoxalase family protein                                                                | NA   | 1.235 | 6.46E-02 |
| MSMEG_3883 | 5'-3' exonuclease                                                                        | NA   | 0.902 | 4.22E-02 |
| MSMEG_3884 | conserved hypothetical protein                                                           | NA   | 0.843 | 1.58E-02 |
| MSMEG_3885 | DEAD/DEAH box helicase                                                                   | NA   | 0.963 | 2.48E-01 |
| MSMEG_3886 | twin arginine-targeting protein translocase TatC                                         | tatC | 1.077 | 2.35E-03 |
| MSMEG_3887 | twin arginine-targeting protein translocase, TatA/E family protein                       | tatA | 1.072 | 5.50E-01 |
| MSMEG_3888 | conserved hypothetical protein                                                           | NA   | 1.088 | 6.99E-01 |
| MSMEG_3889 | conserved hypothetical protein; this gene contains a frame shift which is not the result | NA   | 0.866 | 3.99E-04 |
| MSMEG_3889 | conserved hypothetical protein; this gene contains a frame shift which is not the result | NA   | 1.035 | 6.27E-01 |
| MSMEG_3890 | proteasome component                                                                     | NA   | 0.827 | 3.45E-03 |
| MSMEG_3891 | hydrolase                                                                                | NA   | 0.892 | 4.70E-01 |

|            |                                                                                          |      |       |          |
|------------|------------------------------------------------------------------------------------------|------|-------|----------|
| MSMEG_3892 | hypothetical protein                                                                     | NA   | 1.007 | 9.58E-01 |
| MSMEG_3893 | hypothetical protein                                                                     | NA   | 0.847 | 2.09E-01 |
| MSMEG_3894 | proteasome alpha subunit                                                                 | NA   | 0.878 | 5.57E-02 |
| MSMEG_3895 | proteasome beta subunit                                                                  | NA   | 0.887 | 1.89E-01 |
| MSMEG_3896 | conserved hypothetical protein                                                           | NA   | 0.913 | 3.48E-01 |
| MSMEG_3897 | proteasome component                                                                     | NA   | 0.952 | 2.14E-01 |
| MSMEG_3898 | ectoine hydroxylase                                                                      | thpD | 1.033 | 6.57E-01 |
| MSMEG_3899 | ectoine synthase                                                                         | ectC | 0.949 | 5.21E-01 |
| MSMEG_3900 | diaminobutyrate--2-oxoglutarate aminotransferase                                         | ectB | 1.017 | 8.69E-01 |
| MSMEG_3901 | L-2,4-diaminobutyric acid acetyltransferase                                              | ectA | 0.995 | 9.58E-01 |
| MSMEG_3902 | ATPase, AAA family protein                                                               | NA   | 1.039 | 7.25E-01 |
| MSMEG_3903 | Low molecular weight antigen MTB12                                                       | NA   | 1.130 | 2.98E-01 |
| MSMEG_3904 | LppK protein                                                                             | NA   | 1.450 | 2.78E-02 |
| MSMEG_3905 | conserved hypothetical protein                                                           | NA   | 1.346 | 3.90E-02 |
| MSMEG_3906 | tRNA (adenine-N(1)-)-methyltransferase                                                   | NA   | 1.342 | 6.62E-02 |
| MSMEG_3907 | RecB family protein exonuclease                                                          | NA   | 0.921 | 3.67E-01 |
| MSMEG_3908 | conserved hypothetical protein                                                           | NA   | 0.945 | 5.00E-01 |
| MSMEG_3909 | conserved hypothetical protein                                                           | NA   | 1.019 | 8.71E-01 |
| MSMEG_3910 | conserved hypothetical protein                                                           | NA   | 1.231 | 2.21E-02 |
| MSMEG_3911 | oxidoreductase                                                                           | NA   | 1.164 | 3.75E-01 |
| MSMEG_3912 | acetoacetyl-CoA reductase                                                                | NA   | 0.972 | 7.63E-01 |
| MSMEG_3913 | short chain dehydrogenase; this gene contains a frame shift which is not the result of a | NA   | 1.435 | 5.50E-02 |
| MSMEG_3914 | beta-lactamase                                                                           | NA   | 1.704 | 1.31E-01 |
| MSMEG_3915 | NAD-dependent alcohol dehydrogenase                                                      | NA   | 1.000 | 9.99E-01 |
| MSMEG_3916 | hypothetical protein                                                                     | NA   | 1.138 | 1.14E-01 |
| MSMEG_3917 | hypothetical protein                                                                     | NA   | 1.033 | 7.27E-01 |
| MSMEG_3918 | hypothetical protein                                                                     | NA   | 1.072 | 1.49E-01 |
| MSMEG_3919 | hypothetical protein                                                                     | NA   | 0.795 | 9.95E-03 |
| MSMEG_3920 | hypothetical protein                                                                     | NA   | 0.809 | 2.12E-02 |
| MSMEG_3921 | hypothetical protein                                                                     | NA   | 1.026 | 7.37E-01 |
| MSMEG_3922 | hypothetical protein                                                                     | NA   | 0.831 | 3.81E-02 |

|            |                                                       |    |       |          |
|------------|-------------------------------------------------------|----|-------|----------|
| MSMEG_3923 | conserved hypothetical protein                        | NA | 1.215 | 2.00E-02 |
| MSMEG_3924 | peptide synthetase ScpsB, putative                    | NA | 0.931 | 7.38E-01 |
| MSMEG_3925 | AttM/AiiB family protein                              | NA | 1.529 | 4.40E-01 |
| MSMEG_3926 | cation-transporting ATPase Pma1                       | NA | 2.110 | 4.29E-01 |
| MSMEG_3927 | peptidase M52, hydrogen uptake protein                | NA | 0.997 | 9.83E-01 |
| MSMEG_3928 | [NiFe] hydrogenase, alpha subunit, putative           | NA | 1.027 | 5.85E-01 |
| MSMEG_3929 | [NiFe] hydrogenase, delta subunit, putative           | NA | 1.334 | 1.58E-02 |
| MSMEG_3930 | [NiFe] hydrogenase, gamma subunit, putative           | NA | 0.993 | 9.64E-01 |
| MSMEG_3931 | [NiFe] hydrogenase, beta subunit, putative            | NA | 0.931 | 3.55E-01 |
| MSMEG_3932 | 14 kDa antigen                                        | NA | 1.144 | 4.59E-01 |
| MSMEG_3933 | conserved hypothetical protein                        | NA | 0.950 | 7.39E-01 |
| MSMEG_3934 | phosphoenolpyruvate synthase                          | NA | 1.095 | 5.91E-01 |
| MSMEG_3935 | conserved hypothetical protein                        | NA | 1.371 | 4.40E-01 |
| MSMEG_3936 | universal stress protein family protein               | NA | 1.230 | 1.65E-01 |
| MSMEG_3937 | conserved hypothetical protein                        | NA | 1.072 | 7.37E-01 |
| MSMEG_3938 | hypothetical protein                                  | NA | 1.371 | 4.05E-01 |
| MSMEG_3939 | universal stress protein family protein               | NA | 1.298 | 3.40E-01 |
| MSMEG_3940 | universal stress protein family protein               | NA | 1.226 | 3.79E-01 |
| MSMEG_3941 | GAF family protein                                    | NA | 1.687 | 1.87E-01 |
| MSMEG_3942 | conserved hypothetical protein                        | NA | 1.058 | 3.30E-01 |
| MSMEG_3943 | conserved hypothetical protein                        | NA | 1.012 | 8.23E-01 |
| MSMEG_3944 | two component transcriptional regulatory protein devr | NA | 0.836 | 2.59E-01 |
| MSMEG_3945 | universal stress protein family protein               | NA | 0.932 | 7.07E-01 |
| MSMEG_3946 | probable conserved transmembrane protein              | NA | 0.846 | 4.01E-01 |
| MSMEG_3947 | 6-phosphofructokinase isozyme 2                       | NA | 0.984 | 7.69E-01 |
| MSMEG_3948 | acyltransferase, ws/dgat/mgat subfamily protein       | NA | 0.958 | 7.27E-01 |
| MSMEG_3948 | acyltransferase, ws/dgat/mgat subfamily protein       | NA | 1.240 | 7.40E-02 |
| MSMEG_3949 | hypothetical protein                                  | NA | 1.575 | 4.43E-01 |
| MSMEG_3950 | universal stress protein family protein               | NA | 0.956 | 8.22E-01 |
| MSMEG_3951 | conserved hypothetical protein                        | NA | 1.208 | 1.61E-01 |
| MSMEG_3952 | conserved hypothetical protein                        | NA | 0.906 | 1.54E-01 |

|            |                                                                                           |    |       |          |
|------------|-------------------------------------------------------------------------------------------|----|-------|----------|
| MSMEG_3953 | conserved hypothetical protein                                                            | NA | 1.292 | 3.53E-01 |
| MSMEG_3954 | trehalose 6-phosphate phosphorylase                                                       | NA | 1.017 | 8.67E-01 |
| MSMEG_3955 | conserved hypothetical protein                                                            | NA | 1.029 | 6.85E-01 |
| MSMEG_3956 | alkylhydroperoxidase AhpD                                                                 | NA | 0.960 | 2.26E-01 |
| MSMEG_3957 | conserved 13e12 repeat family protein                                                     | NA | 4.119 | 3.16E-01 |
| MSMEG_3958 | glyoxalase/bleomycin resistance protein/dioxygenase                                       | NA | 0.847 | 1.12E-02 |
| MSMEG_3959 | transcriptional regulator                                                                 | NA | 0.904 | 4.97E-01 |
| MSMEG_3960 | transcriptional regulator                                                                 | NA | 1.091 | 4.18E-01 |
| MSMEG_3961 | transcriptional regulator                                                                 | NA | 1.140 | 3.30E-01 |
| MSMEG_3962 | lactate 2-monooxygenase                                                                   | NA | 0.733 | 2.05E-02 |
| MSMEG_3963 | hypothetical protein                                                                      | NA | 1.123 | 5.58E-01 |
| MSMEG_3964 | pyruvate dehydrogenase                                                                    | NA | 0.908 | 3.34E-02 |
| MSMEG_3965 | hypothetical protein                                                                      | NA | 0.801 | 1.77E-02 |
| MSMEG_3966 | hypothetical protein                                                                      | NA | 0.779 | 5.80E-04 |
| MSMEG_3967 | TonB-dependent receptor                                                                   | NA | 1.028 | 8.89E-01 |
| MSMEG_3968 | hypothetical protein                                                                      | NA | 1.229 | 2.93E-01 |
| MSMEG_3969 | hypothetical protein                                                                      | NA | 0.811 | 2.39E-01 |
| MSMEG_3970 | glutamyl-tRNA(Gln) amidotransferase subunit A                                             | NA | 0.975 | 9.05E-01 |
| MSMEG_3971 | hypothetical protein                                                                      | NA | 1.057 | 4.95E-01 |
| MSMEG_3972 | transcriptional regulator, LysR family protein                                            | NA | 1.189 | 2.91E-01 |
| MSMEG_3973 | N-methylhydantoinase                                                                      | NA | 1.039 | 3.18E-01 |
| MSMEG_3974 | hydantoin utilization protein A; this gene contains a frame shift which is not the result | NA | 0.947 | 7.41E-01 |
| MSMEG_3975 | regulatory protein, putative                                                              | NA | 1.152 | 2.84E-01 |
| MSMEG_3976 | DNA-binding protein                                                                       | NA | 0.777 | 1.89E-01 |
| MSMEG_3977 | conserved hypothetical protein                                                            | NA | 1.422 | 5.24E-02 |
| MSMEG_3978 | beta-lactamase                                                                            | NA | 1.125 | 3.05E-02 |
| MSMEG_3979 | alpha/beta hydrolase; this gene contains a frame shift which is not the result of seque   | NA | 1.107 | 2.66E-01 |
| MSMEG_3980 | transcriptional regulator, GntR family protein                                            | NA | 1.031 | 6.03E-01 |
| MSMEG_3981 | L-carnitine dehydratase/bile acid-inducible protein F                                     | NA | 0.864 | 3.91E-01 |
| MSMEG_3982 | acyl-CoA dehydrogenase                                                                    | NA | 1.021 | 8.95E-01 |
| MSMEG_3983 | L-carnitine dehydratase/bile acid-inducible protein F; this gene contains a frame shift \ | NA | 0.899 | 1.66E-01 |

|            |                                                                                         |      |       |          |
|------------|-----------------------------------------------------------------------------------------|------|-------|----------|
| MSMEG_3983 | L-carnitine dehydratase/bile acid-inducible protein F; this gene contains a frame shift | NA   | 1.089 | 2.97E-01 |
| MSMEG_3984 | Transposase IS116/IS110/IS902 family protein                                            | NA   | 0.884 | 2.25E-01 |
| MSMEG_3984 | Transposase IS116/IS110/IS902 family protein                                            | NA   | 1.086 | 5.13E-01 |
| MSMEG_3985 | integral membrane transport protein                                                     | NA   | 0.836 | 1.77E-01 |
| MSMEG_3986 | acetyl-coenzyme A synthetase                                                            | NA   | 0.950 | 6.09E-01 |
| MSMEG_3987 | FAD dependent oxidoreductase                                                            | NA   | 0.943 | 3.61E-01 |
| MSMEG_3988 | transcriptional regulator, AsnC family protein                                          | NA   | 1.171 | 2.49E-01 |
| MSMEG_3989 | peptidase M20D, amidohydrolase                                                          | NA   | 1.717 | 8.98E-02 |
| MSMEG_3990 | putative transporter                                                                    | NA   | 1.037 | 8.51E-01 |
| MSMEG_3991 | cyclase                                                                                 | NA   | 1.039 | 5.02E-01 |
| MSMEG_3992 | integral membrane transport protein                                                     | NA   | 0.919 | 3.78E-01 |
| MSMEG_3993 | Asp/Glu racemase                                                                        | NA   | 0.972 | 6.87E-01 |
| MSMEG_3994 | short chain dehydrogenase                                                               | NA   | 0.865 | 6.15E-02 |
| MSMEG_3995 | N-carbamoyl-L-amino acid amidohydrolase                                                 | NA   | 1.036 | 3.81E-01 |
| MSMEG_3996 | dihydropyrimidinase                                                                     | hydA | 0.932 | 7.55E-01 |
| MSMEG_3997 | regulatory protein                                                                      | NA   | 1.105 | 3.63E-01 |
| MSMEG_3998 | MmsAB operon regulatory protein                                                         | NA   | 1.209 | 4.92E-01 |
| MSMEG_3999 | ABC transporter periplasmic-binding protein YphF                                        | NA   | 0.855 | 1.96E-02 |
| MSMEG_4000 | hypothetical ABC transporter ATP-binding protein YphE                                   | NA   | 1.049 | 8.05E-01 |
| MSMEG_4001 | ribose transport system permease protein RbsC                                           | NA   | 0.793 | 7.98E-02 |
| MSMEG_4002 | oxidoreductase, zinc-binding dehydrogenase family protein                               | NA   | 0.838 | 5.73E-02 |
| MSMEG_4003 | conserved hypothetical protein                                                          | NA   | 0.828 | 1.32E-02 |
| MSMEG_4004 | 3-oxoacyl-[acyl-carrier-protein] reductase                                              | NA   | 0.739 | 1.34E-01 |
| MSMEG_4005 | calcium-binding protein                                                                 | NA   | 1.081 | 8.32E-01 |
| MSMEG_4006 | transcriptional regulator, CdaR, putative                                               | NA   | 0.964 | 8.05E-01 |
| MSMEG_4007 | oxidoreductase, 2OG-Fe(II) oxygenase family protein                                     | NA   | 1.020 | 6.48E-01 |
| MSMEG_4008 | oxidoreductase, 2OG-Fe(II) oxygenase family protein                                     | NA   | 1.002 | 9.85E-01 |
| MSMEG_4009 | vanillate O-demethylase oxidoreductase                                                  | NA   | 0.997 | 9.55E-01 |
| MSMEG_4010 | glyoxalase family protein                                                               | NA   | 0.984 | 7.11E-01 |
| MSMEG_4011 | putative pyrimidine permease RutG                                                       | NA   | 1.209 | 4.28E-01 |
| MSMEG_4012 | dihydropyrimidinase                                                                     | hydA | 1.528 | 4.36E-01 |



|            |                                                           |    |       |          |
|------------|-----------------------------------------------------------|----|-------|----------|
| MSMEG_4013 | oxidoreductase                                            | NA | 1.089 | 6.52E-01 |
| MSMEG_4014 | N-carbamoyl-L-amino acid amidohydrolase                   | NA | 0.900 | 4.08E-01 |
| MSMEG_4015 | hypothetical protein                                      | NA | 1.381 | 2.81E-01 |
| MSMEG_4016 | conserved hypothetical protein                            | NA | 0.956 | 5.86E-01 |
| MSMEG_4017 | BmyD protein                                              | NA | 1.474 | 2.53E-01 |
| MSMEG_4018 | nucleotidyltransferase domain protein                     | NA | 1.119 | 5.07E-01 |
| MSMEG_4019 | AMP-dependent synthetase and ligase                       | NA | 1.933 | 3.95E-01 |
| MSMEG_4020 | enoyl-CoA hydratase/isomerase family protein              | NA | 1.611 | 5.17E-01 |
| MSMEG_4021 | hypothetical protein                                      | NA | 0.996 | 9.87E-01 |
| MSMEG_4022 | TetR-family protein transcriptional regulator             | NA | 1.272 | 1.14E-02 |
| MSMEG_4023 | oxidoreductase                                            | NA | 1.235 | 1.11E-01 |
| MSMEG_4024 | transcriptional regulator, TetR family protein            | NA | 1.234 | 5.64E-03 |
| MSMEG_4025 | transcriptional regulator, LysR family protein            | NA | 1.467 | 2.79E-01 |
| MSMEG_4026 | hypothetical protein                                      | NA | 0.903 | 3.86E-01 |
| MSMEG_4027 | zinc-containing alcohol dehydrogenase superfamily protein | NA | 1.085 | 6.94E-01 |
| MSMEG_4028 | hypothetical protein                                      | NA | 1.278 | 7.91E-03 |
| MSMEG_4029 | conserved hypothetical protein                            | NA | 1.049 | 5.65E-01 |
| MSMEG_4030 | conserved hypothetical protein                            | NA | 0.839 | 1.63E-01 |
| MSMEG_4031 | hypothetical protein                                      | NA | 1.037 | 8.58E-01 |
| MSMEG_4032 | zinc-binding alcohol dehydrogenase                        | NA | 1.226 | 3.01E-01 |
| MSMEG_4033 | TetR-family protein transcriptional regulator             | NA | 1.028 | 8.44E-01 |
| MSMEG_4034 | NAD dependent epimerase/dehydratase family protein        | NA | 0.754 | 8.33E-02 |
| MSMEG_4035 | citrate synthase                                          | NA | 0.806 | 2.17E-01 |
| MSMEG_4036 | crotonobetaine/carnitine-CoA ligase                       | NA | 0.974 | 5.63E-01 |
| MSMEG_4037 | hypothetical protein                                      | NA | 0.951 | 4.58E-01 |
| MSMEG_4038 | vanillin dehydrogenase                                    | NA | 0.915 | 5.63E-01 |
| MSMEG_4039 | aryl-alcohol dehydrogenase                                | NA | 1.055 | 8.88E-01 |
| MSMEG_4040 | nitroreductase                                            | NA | 0.861 | 3.83E-01 |
| MSMEG_4041 | hydroxyquinol 1,2-dioxygenase                             | NA | 0.940 | 6.36E-01 |
| MSMEG_4042 | transcriptional regulator, GntR family protein            | NA | 0.794 | 3.59E-02 |
| MSMEG_4043 | amidohydrolase 2                                          | NA | 0.858 | 3.94E-03 |

|            |                                                                                         |    |       |          |
|------------|-----------------------------------------------------------------------------------------|----|-------|----------|
| MSMEG_4044 | GAF domain protein                                                                      | NA | 0.764 | 4.79E-02 |
| MSMEG_4045 | muconolactone delta-isomerase                                                           | NA | 1.055 | 1.39E-01 |
| MSMEG_4046 | L-carnitine dehydratase/bile acid-inducible protein F                                   | NA | 1.340 | 4.44E-01 |
| MSMEG_4047 | dihydropteroate synthase                                                                | NA | 0.991 | 9.49E-01 |
| MSMEG_4048 | cyclase                                                                                 | NA | 0.622 | 5.19E-02 |
| MSMEG_4049 | sugar transporter, permease protein                                                     | NA | 0.927 | 4.87E-01 |
| MSMEG_4050 | hypothetical protein                                                                    | NA | 1.931 | 1.82E-01 |
| MSMEG_4051 | hypothetical protein                                                                    | NA | 1.550 | 1.66E-01 |
| MSMEG_4052 | hypothetical protein                                                                    | NA | 1.083 | 5.34E-01 |
| MSMEG_4053 | transcriptional regulatory protein                                                      | NA | 1.379 | 4.46E-01 |
| MSMEG_4054 | hypothetical protein                                                                    | NA | 0.948 | 6.97E-01 |
| MSMEG_4055 | short-chain dehydrogenase/reductase SDR                                                 | NA | 1.013 | 6.39E-01 |
| MSMEG_4056 | conserved secreted protein                                                              | NA | 1.059 | 7.64E-01 |
| MSMEG_4057 | transcriptional regulator, GntR family protein                                          | NA | 0.887 | 4.59E-01 |
| MSMEG_4058 | major facilitator superfamily protein                                                   | NA | 1.031 | 5.99E-01 |
| MSMEG_4059 | haloacid dehalogenase, type II                                                          | NA | 0.728 | 2.15E-02 |
| MSMEG_4060 | aspartate aminotransferase; this gene contains a frame shift which is not the result of | NA | 0.726 | 1.72E-03 |
| MSMEG_4060 | aspartate aminotransferase; this gene contains a frame shift which is not the result of | NA | 0.899 | 3.17E-01 |
| MSMEG_4061 | translation initiation inhibitor                                                        | NA | 1.039 | 5.11E-01 |
| MSMEG_4062 | glutamyl-tRNA(Gln) amidotransferase subunit A                                           | NA | 1.061 | 7.73E-01 |
| MSMEG_4063 | amidohydrolase family protein                                                           | NA | 1.349 | 5.62E-02 |
| MSMEG_4064 | zinc-binding alcohol dehydrogenase                                                      | NA | 1.120 | 1.64E-01 |
| MSMEG_4065 | feruloyl-CoA synthetase                                                                 | NA | 2.887 | 4.56E-01 |
| MSMEG_4066 | conserved hypothetical protein                                                          | NA | 0.988 | 8.74E-01 |
| MSMEG_4067 | zinc-containing alcohol dehydrogenase superfamily protein                               | NA | 0.858 | 7.03E-02 |
| MSMEG_4068 | hypothetical protein                                                                    | NA | 1.034 | 4.12E-01 |
| MSMEG_4069 | hypothetical protein                                                                    | NA | 0.982 | 9.41E-01 |
| MSMEG_4070 | transcriptional regulator, TetR family protein, putative                                | NA | 1.076 | 2.40E-01 |
| MSMEG_4071 | conserved hypothetical protein; this region contains one or more premature stops and    | NA | 1.537 | 7.81E-02 |
| MSMEG_4072 | ISMsm5, transposase                                                                     | NA | 0.987 | 5.77E-01 |
| MSMEG_4073 | DNA-binding protein; this gene contains a frame shift which is not the result of sequen | NA | 1.081 | 2.08E-01 |

|            |                                                                                          |      |       |          |
|------------|------------------------------------------------------------------------------------------|------|-------|----------|
| MSMEG_4074 | peroxisomal trans-2-enoyl-CoA reductase                                                  | NA   | 1.273 | 2.88E-01 |
| MSMEG_4075 | CoA-binding protein                                                                      | NA   | 0.960 | 6.41E-01 |
| MSMEG_4076 | butyryl-CoA dehydrogenase                                                                | NA   | 1.092 | 7.79E-01 |
| MSMEG_4077 | enoyl-CoA hydratase                                                                      | NA   | 0.950 | 5.02E-01 |
| MSMEG_4078 | hypothetical metabolite transport protein YaaU                                           | NA   | 0.850 | 3.73E-01 |
| MSMEG_4079 | putative hydrolase                                                                       | NA   | 0.969 | 6.76E-01 |
| MSMEG_4080 | fmnh2-utilizing oxygenase; this gene contains a frame shift which is not the result of s | NA   | 1.210 | 3.68E-01 |
| MSMEG_4082 | monooxygenase                                                                            | NA   | 0.641 | 1.80E-03 |
| MSMEG_4083 | putative monooxygenase                                                                   | NA   | 0.704 | 2.39E-04 |
| MSMEG_4084 | putative acyl-CoA dehydrogenase                                                          | NA   | 0.808 | 3.66E-03 |
| MSMEG_4085 | nitrilotriacetate monooxygenase component A                                              | NA   | 0.836 | 1.27E-02 |
| MSMEG_4086 | nitrilotriacetate monooxygenase component A                                              | ssuD | 0.808 | 2.25E-02 |
| MSMEG_4087 | major facilitator superfamily protein                                                    | NA   | 0.890 | 4.73E-02 |
| MSMEG_4090 | putative lclR family protein transcriptional regulator                                   | NA   | 0.711 | 3.88E-03 |
| MSMEG_4091 | nitrilotriacetate monooxygenase component A                                              | ssuD | 0.818 | 7.20E-02 |
| MSMEG_4092 | alkanal monooxygenase                                                                    | NA   | 0.816 | 2.09E-01 |
| MSMEG_4093 | oxidoreductase, aldo/keto reductase family protein                                       | NA   | 0.940 | 4.66E-01 |
| MSMEG_4094 | acyl-CoA dehydrogenase                                                                   | NA   | 1.039 | 6.62E-01 |
| MSMEG_4095 | putative monooxygenase                                                                   | NA   | 0.950 | 6.60E-01 |
| MSMEG_4096 | nitrilotriacetate monooxygenase component A                                              | ssuD | 1.522 | 3.21E-01 |
| MSMEG_4097 | acyl-CoA dehydrogenase domain protein                                                    | NA   | 2.066 | 2.48E-01 |
| MSMEG_4098 | ABC transporter ATP-binding protein                                                      | NA   | 1.056 | 2.32E-01 |
| MSMEG_4099 | ABC transporter permease protein                                                         | NA   | 1.742 | 4.14E-01 |
| MSMEG_4100 | ABC transporter permease protein                                                         | NA   | 1.772 | 1.20E-01 |
| MSMEG_4101 | ABC-type transporter, substrate binding protein                                          | NA   | 1.040 | 5.70E-01 |
| MSMEG_4102 | conserved hypothetical protein                                                           | NA   | 0.938 | 7.35E-01 |
| MSMEG_4103 | alkanesulfonate monooxygenase                                                            | NA   | 1.113 | 6.04E-01 |
| MSMEG_4104 | transporter, major facilitator family protein                                            | NA   | 1.024 | 8.18E-01 |
| MSMEG_4105 | transposase subunit                                                                      | NA   | 0.899 | 2.55E-01 |
| MSMEG_4105 | transposase subunit                                                                      | NA   | 0.993 | 9.54E-01 |
| MSMEG_4106 | transposase                                                                              | NA   | 1.070 | 5.52E-01 |

|            |                                                                                          |      |       |          |
|------------|------------------------------------------------------------------------------------------|------|-------|----------|
| MSMEG_4106 | transposase                                                                              | NA   | 1.235 | 2.48E-02 |
| MSMEG_4107 | phosphoglycerate mutase, putative                                                        | NA   | 0.961 | 5.43E-01 |
| MSMEG_4108 | NAD(P) transhydrogenase, beta subunit                                                    | pntB | 0.906 | 3.37E-01 |
| MSMEG_4109 | NAD(P) transhydrogenase, alpha subunit                                                   | pntA | 0.887 | 2.18E-01 |
| MSMEG_4110 | 3-hydroxyacyl-CoA dehydrogenase                                                          | NA   | 0.715 | 1.29E-01 |
| MSMEG_4111 | alpha-methylacyl-CoA racemase                                                            | NA   | 0.758 | 4.90E-02 |
| MSMEG_4112 | cyclohexanecarboxylate-CoA ligase                                                        | NA   | 0.692 | 1.09E-02 |
| MSMEG_4113 | acyl-CoA dehydrogenase                                                                   | NA   | 0.743 | 2.38E-02 |
| MSMEG_4114 | naphthoate synthase                                                                      | menB | 0.859 | 1.03E-01 |
| MSMEG_4115 | 3-hydroxybutyryl-CoA dehydrogenase                                                       | NA   | 0.878 | 2.64E-01 |
| MSMEG_4116 | 3-hydroxybutyryl-CoA dehydrogenase                                                       | NA   | 0.832 | 1.21E-01 |
| MSMEG_4117 | 2-deoxy-D-gluconate 3-dehydrogenase                                                      | NA   | 0.838 | 4.18E-02 |
| MSMEG_4118 | acyl-CoA dehydrogenase                                                                   | NA   | 0.962 | 6.58E-01 |
| MSMEG_4119 | 3-hydroxybutyryl-CoA dehydratase                                                         | NA   | 0.933 | 5.23E-02 |
| MSMEG_4120 | CAIB/BAIF family protein                                                                 | NA   | 0.947 | 1.53E-01 |
| MSMEG_4121 | GntR-family protein transcriptional regulator                                            | NA   | 1.254 | 1.51E-02 |
| MSMEG_4122 | major facilitator family protein transporter                                             | NA   | 1.004 | 9.61E-01 |
| MSMEG_4123 | 3-hydroxyisobutyrate dehydrogenase                                                       | NA   | 1.293 | 1.87E-01 |
| MSMEG_4124 | conserved hypothetical protein                                                           | NA   | 1.068 | 5.70E-01 |
| MSMEG_4125 | oxidoreductase, short chain dehydrogenase/reductase family protein                       | NA   | 0.906 | 6.48E-02 |
| MSMEG_4126 | hydrolase, isochorismatase family protein                                                | NA   | 1.093 | 1.81E-01 |
| MSMEG_4127 | TnpC protein                                                                             | NA   | 0.907 | 1.87E-01 |
| MSMEG_4128 | conserved hypothetical protein                                                           | NA   | 0.900 | 1.66E-01 |
| MSMEG_4129 | hypothetical protein                                                                     | NA   | 1.074 | 2.16E-01 |
| MSMEG_4130 | polysaccharide deacetylase family protein                                                | NA   | 3.274 | 2.51E-01 |
| MSMEG_4131 | hypothetical protein                                                                     | NA   | 1.188 | 1.39E-01 |
| MSMEG_4133 | transposase                                                                              | NA   | 0.807 | 2.18E-04 |
| MSMEG_4134 | TnpC protein; this gene contains a frame shift which is not the result of sequencing err | NA   | 0.668 | 2.17E-02 |
| MSMEG_4134 | TnpC protein; this gene contains a frame shift which is not the result of sequencing err | NA   | 1.028 | 7.31E-01 |
| MSMEG_4135 | possible lysine decarboxylase superfamily protein                                        | NA   | 1.034 | 8.68E-01 |
| MSMEG_4136 | dTDP-glucose 4,6-dehydratase                                                             | NA   | 0.944 | 6.73E-01 |

|            |                                                                                          |    |       |          |
|------------|------------------------------------------------------------------------------------------|----|-------|----------|
| MSMEG_4137 | hypothetical protein                                                                     | NA | 1.238 | 3.17E-01 |
| MSMEG_4138 | aliphatic nitrilase                                                                      | NA | 2.926 | 3.79E-01 |
| MSMEG_4139 | major facilitator superfamily MFS_1; this gene contains a frame shift which is not the r | NA | 1.027 | 6.71E-01 |
| MSMEG_4140 | GntR-family protein transcriptional regulator                                            | NA | 1.234 | 5.46E-01 |
| MSMEG_4141 | conserved hypothetical protein                                                           | NA | 1.757 | 1.63E-02 |
| MSMEG_4142 | transcriptional repressor, TetR family protein, putative                                 | NA | 1.023 | 4.92E-01 |
| MSMEG_4143 | conserved hypothetical protein                                                           | NA | 0.803 | 7.14E-02 |
| MSMEG_4144 | transcriptional regulator, LysR family protein                                           | NA | 0.831 | 5.78E-02 |
| MSMEG_4145 | cupin 2 protein                                                                          | NA | 1.007 | 7.28E-01 |
| MSMEG_4146 | quinone oxidoreductase                                                                   | NA | 1.179 | 4.84E-01 |
| MSMEG_4147 | major facilitator superfamily protein MFS_1, putative                                    | NA | 1.401 | 1.06E-01 |
| MSMEG_4148 | lipase                                                                                   | NA | 0.751 | 2.69E-02 |
| MSMEG_4149 | acetaldehyde dehydrogenase                                                               | NA | 0.972 | 5.19E-01 |
| MSMEG_4150 | 4-hydroxy-2-oxovalerate aldolase                                                         | NA | 0.965 | 7.01E-01 |
| MSMEG_4151 | conserved domain protein                                                                 | NA | 1.132 | 5.42E-01 |
| MSMEG_4152 | phenoxybenzoate dioxygenase beta subunit                                                 | NA | 1.071 | 1.10E-01 |
| MSMEG_4153 | cytochrome P450                                                                          | NA | 1.213 | 2.94E-01 |
| MSMEG_4154 | transposase, Mutator family protein                                                      | NA | 1.205 | 3.62E-01 |
| MSMEG_4155 | transposase A                                                                            | NA | 0.973 | 6.72E-01 |
| MSMEG_4156 | putative transposase                                                                     | NA | 3.062 | 4.05E-01 |
| MSMEG_4157 | putative transposase                                                                     | NA | 1.025 | 7.28E-01 |
| MSMEG_4158 | putative transposase                                                                     | NA | 0.892 | 2.14E-03 |
| MSMEG_4160 | hypothetical protein                                                                     | NA | 1.275 | 2.35E-01 |
| MSMEG_4161 | hypothetical protein                                                                     | NA | 0.949 | 4.57E-01 |
| MSMEG_4162 | conserved hypothetical protein                                                           | NA | 0.995 | 9.82E-01 |
| MSMEG_4163 | 3-oxoacyl-[acyl-carrier-protein] reductase                                               | NA | 1.099 | 1.28E-02 |
| MSMEG_4164 | 3-hydroxybutyryl-CoA dehydratase                                                         | NA | 1.030 | 8.84E-01 |
| MSMEG_4165 | [NAD <sup>+</sup> ] benzaldehyde dehydrogenase                                           | NA | 1.158 | 7.37E-01 |
| MSMEG_4166 | acyl-CoA dehydrogenase                                                                   | NA | 0.684 | 6.79E-02 |
| MSMEG_4167 | alcohol dehydrogenase B                                                                  | NA | 0.737 | 2.09E-02 |
| MSMEG_4168 | propionate CoA-transferase                                                               | NA | 0.848 | 2.66E-01 |

|            |                                                                                         |      |       |          |
|------------|-----------------------------------------------------------------------------------------|------|-------|----------|
| MSMEG_4169 | 3-oxoacyl-[acyl-carrier-protein] reductase                                              | NA   | 1.116 | 4.61E-01 |
| MSMEG_4170 | ribose transport ATP-binding protein RbsA                                               | NA   | 1.077 | 5.15E-01 |
| MSMEG_4171 | ribose transport system permease protein RbsC                                           | NA   | 0.829 | 2.61E-01 |
| MSMEG_4172 | D-ribose-binding periplasmic protein RbsB                                               | NA   | 0.684 | 3.36E-02 |
| MSMEG_4173 | MaoC family protein                                                                     | NA   | 1.134 | 1.63E-01 |
| MSMEG_4174 | transcriptional regulator, IclR family protein                                          | NA   | 1.001 | 9.95E-01 |
| MSMEG_4175 | transcriptional regulator, ArsR family protein                                          | NA   | 1.288 | 3.19E-02 |
| MSMEG_4176 | conserved hypothetical protein                                                          | NA   | 1.237 | 2.12E-02 |
| MSMEG_4177 | mercuric reductase; this gene contains a frame shift which is not the result of sequenc | NA   | 0.910 | 3.64E-01 |
| MSMEG_4178 | flavodoxin/nitric oxide synthase                                                        | NA   | 1.404 | 7.51E-03 |
| MSMEG_4179 | probable conserved integral membrane protein                                            | NA   | 1.114 | 1.40E-01 |
| MSMEG_4180 | ATP phosphoribosyltransferase                                                           | hisG | 1.003 | 9.51E-01 |
| MSMEG_4181 | phosphoribosyl-ATP pyrophosphohydrolase                                                 | NA   | 1.131 | 2.49E-01 |
| MSMEG_4182 | arabinose-proton symporter                                                              | NA   | 1.236 | 1.26E-01 |
| MSMEG_4183 | phosphoglycolate phosphatase, chromosomal                                               | NA   | 1.379 | 4.20E-03 |
| MSMEG_4184 | dt dp-glucose-46-dehydratase                                                            | NA   | 1.059 | 6.29E-01 |
| MSMEG_4185 | methionine synthase                                                                     | metH | 0.829 | 1.55E-02 |
| MSMEG_4186 | conserved hypothetical protein                                                          | NA   | 1.034 | 5.12E-01 |
| MSMEG_4187 | conserved hypothetical protein                                                          | NA   | 0.730 | 4.72E-03 |
| MSMEG_4188 | short chain dehydrogenase                                                               | NA   | 0.908 | 2.41E-01 |
| MSMEG_4189 | cysteinyl-tRNA synthetase                                                               | cysS | 1.052 | 6.16E-01 |
| MSMEG_4190 | inositol monophosphatase family protein                                                 | NA   | 1.059 | 3.37E-01 |
| MSMEG_4191 | conserved hypothetical protein                                                          | NA   | 1.085 | 3.93E-02 |
| MSMEG_4192 | conserved hypothetical protein                                                          | NA   | 1.015 | 7.40E-01 |
| MSMEG_4193 | phosphoglycerate mutase family protein                                                  | NA   | 0.801 | 1.02E-02 |
| MSMEG_4194 | undecaprenol kinase, putative                                                           | NA   | 0.908 | 1.85E-02 |
| MSMEG_4195 | conserved hypothetical protein                                                          | NA   | 1.224 | 4.33E-01 |
| MSMEG_4196 | LppL protein                                                                            | NA   | 1.091 | 9.36E-02 |
| MSMEG_4197 | conserved hypothetical protein                                                          | NA   | 1.029 | 4.63E-01 |
| MSMEG_4198 | dihydroorotate oxidase                                                                  | pyrD | 0.935 | 2.38E-01 |
| MSMEG_4199 | conserved hypothetical protein                                                          | NA   | 0.851 | 8.35E-02 |

|            |                                                                                        |      |       |          |
|------------|----------------------------------------------------------------------------------------|------|-------|----------|
| MSMEG_4200 | peptidase M20                                                                          | NA   | 1.035 | 6.42E-01 |
| MSMEG_4202 | conserved hypothetical protein                                                         | NA   | 1.255 | 4.12E-01 |
| MSMEG_4203 | peptidase S8 and S53, subtilisin, kexin, sedolisin                                     | NA   | 0.885 | 2.33E-01 |
| MSMEG_4204 | catalase                                                                               | NA   | 1.072 | 2.53E-01 |
| MSMEG_4205 | putative transcriptional regulator                                                     | NA   | 1.408 | 1.68E-01 |
| MSMEG_4206 | Molybdopterin oxidoreductase; this gene contains a frame shift which is not the result | NA   | 0.947 | 6.28E-01 |
| MSMEG_4206 | Molybdopterin oxidoreductase; this gene contains a frame shift which is not the result | NA   | 1.062 | 5.39E-01 |
| MSMEG_4207 | universal stress protein family protein                                                | NA   | 0.839 | 4.55E-01 |
| MSMEG_4208 | integral membrane protein                                                              | NA   | 1.088 | 7.33E-01 |
| MSMEG_4209 | integral membrane protein                                                              | NA   | 1.808 | 4.08E-01 |
| MSMEG_4210 | secreted protein                                                                       | NA   | 1.014 | 9.23E-01 |
| MSMEG_4211 | two component system histidine kinase                                                  | NA   | 1.215 | 5.51E-01 |
| MSMEG_4212 | transcriptional regulatory protein CitT                                                | NA   | 1.136 | 1.64E-01 |
| MSMEG_4213 | cytochrome P450 hydroxylase                                                            | NA   | 1.487 | 3.02E-01 |
| MSMEG_4214 | glutamine amidotransferase                                                             | NA   | 1.470 | 9.03E-03 |
| MSMEG_4215 | phosphoribosyltransferase                                                              | NA   | 1.860 | 3.11E-03 |
| MSMEG_4216 | conserved hypothetical protein                                                         | NA   | 1.087 | 3.35E-01 |
| MSMEG_4217 | DivIVA protein                                                                         | NA   | 1.049 | 5.60E-01 |
| MSMEG_4218 | possible conserved transmembrane protein                                               | NA   | 1.037 | 5.96E-01 |
| MSMEG_4219 | conserved hypothetical protein                                                         | NA   | 0.930 | 6.33E-01 |
| MSMEG_4220 | conserved hypothetical protein                                                         | NA   | 0.980 | 5.50E-01 |
| MSMEG_4221 | conserved hypothetical protein                                                         | NA   | 1.135 | 2.59E-01 |
| MSMEG_4222 | cell division protein FtsZ                                                             | ftsZ | 1.047 | 4.04E-01 |
| MSMEG_4223 | hypothetical protein                                                                   | NA   | 0.999 | 9.91E-01 |
| MSMEG_4224 | hypothetical protein                                                                   | NA   | 1.018 | 7.49E-01 |
| MSMEG_4225 | putative Cell division protein FtsQ                                                    | NA   | 0.919 | 2.94E-01 |
| MSMEG_4226 | UDP-N-acetylmuramate--alanine ligase                                                   | murC | 1.036 | 3.33E-01 |
| MSMEG_4227 | undecaprenyldiphospho-muramoylpentapeptide beta-N-acetylglucosaminyltransferase        | murG | 1.140 | 2.15E-01 |
| MSMEG_4228 | cell division protein FtsW                                                             | ftsW | 1.067 | 8.61E-02 |
| MSMEG_4229 | UDP-N-acetylmuramoylalanine--D-glutamate ligase                                        | murD | 1.034 | 5.16E-01 |
| MSMEG_4230 | phospho-N-acetylmuramoyl-pentapeptide- transferase                                     | mraY | 1.158 | 2.06E-01 |

|            |                                                                    |      |       |          |
|------------|--------------------------------------------------------------------|------|-------|----------|
| MSMEG_4231 | UDP-N-acetylmuramoyl-tripeptide--D-alanyl-D- alanine ligase        | NA   | 0.924 | 2.12E-01 |
| MSMEG_4232 | UDP-N-acetylmuramoylalanyl-D-glutamate-2, 6-diaminopimelate ligase | NA   | 1.079 | 3.84E-01 |
| MSMEG_4233 | Penicillin binding protein transpeptidase domain protein           | NA   | 0.828 | 5.84E-02 |
| MSMEG_4234 | conserved hypothetical protein                                     | NA   | 0.806 | 4.03E-03 |
| MSMEG_4235 | S-adenosyl-methyltransferase MraW                                  | mraW | 0.828 | 1.26E-02 |
| MSMEG_4236 | MraZ protein                                                       | mraZ | 0.976 | 3.80E-01 |
| MSMEG_4237 | probable conserved transmembrane protein                           | NA   | 1.149 | 1.15E-01 |
| MSMEG_4238 | conserved hypothetical protein                                     | NA   | 1.195 | 3.51E-02 |
| MSMEG_4239 | LppM protein                                                       | NA   | 1.127 | 1.03E-01 |
| MSMEG_4240 | polyprenyl synthetase                                              | NA   | 0.896 | 9.99E-02 |
| MSMEG_4241 | possible conserved integral membrane protein                       | NA   | 0.960 | 6.26E-01 |
| MSMEG_4242 | transcriptional regulatory protein                                 | NA   | 1.294 | 3.51E-02 |
| MSMEG_4243 | serine/threonine-protein kinase PK-1                               | NA   | 1.348 | 1.06E-02 |
| MSMEG_4244 | 3-deoxy-7-phosphoheptulonate synthase                              | NA   | 0.954 | 3.64E-01 |
| MSMEG_4245 | conserved hypothetical protein                                     | NA   | 1.035 | 8.90E-02 |
| MSMEG_4246 | probable conserved integral membrane protein                       | NA   | 1.022 | 5.81E-01 |
| MSMEG_4247 | probable conserved integral membrane protein                       | NA   | 0.982 | 7.06E-01 |
| MSMEG_4248 | 1-acylglycerol-3-phosphate O-acyltransferase                       | NA   | 0.866 | 5.20E-02 |
| MSMEG_4249 | conserved hypothetical protein                                     | NA   | 0.967 | 6.62E-01 |
| MSMEG_4250 | putative membrane transport ATPase                                 | NA   | 1.084 | 4.19E-01 |
| MSMEG_4251 | cyclase/dehydrase                                                  | NA   | 0.873 | 8.45E-02 |
| MSMEG_4252 | conserved hypothetical protein                                     | NA   | 0.853 | 1.69E-02 |
| MSMEG_4253 | glycosyl transferase, group 1 family protein                       | NA   | 1.018 | 8.98E-01 |
| MSMEG_4254 | AMP-binding enzyme                                                 | NA   | 0.763 | 7.21E-03 |
| MSMEG_4255 | conserved hypothetical protein                                     | NA   | 1.245 | 2.25E-03 |
| MSMEG_4256 | NLP/P60 family protein                                             | NA   | 1.107 | 4.12E-01 |
| MSMEG_4257 | conserved hypothetical protein                                     | NA   | 0.832 | 1.92E-01 |
| MSMEG_4258 | anthranilate phosphoribosyltransferase                             | trpD | 1.139 | 4.51E-02 |
| MSMEG_4259 | DNA polymerase III, epsilon subunit                                | NA   | 1.143 | 5.54E-01 |
| MSMEG_4260 | cytochrome c oxidase subunit 3                                     | NA   | 0.850 | 3.61E-02 |
| MSMEG_4261 | ubiquinol-cytochrome c reductase cytochrome c subunit              | NA   | 0.973 | 6.41E-01 |



|            |                                                                                  |      |       |          |
|------------|----------------------------------------------------------------------------------|------|-------|----------|
| MSMEG_4262 | ubiquinol-cytochrome c reductase iron-sulfur subunit                             | NA   | 0.963 | 5.21E-01 |
| MSMEG_4263 | ubiquinol-cytochrome c reductase cytochrome b subunit                            | NA   | 0.902 | 3.75E-01 |
| MSMEG_4264 | conserved hypothetical protein                                                   | NA   | 0.997 | 9.54E-01 |
| MSMEG_4265 | MmpS3 protein                                                                    | NA   | 1.109 | 3.31E-02 |
| MSMEG_4266 | hypothetical protein                                                             | NA   | 1.163 | 2.14E-01 |
| MSMEG_4267 | probable cytochrome c oxidase polypeptide 4                                      | NA   | 0.997 | 9.39E-01 |
| MSMEG_4268 | cytochrome c oxidase subunit 2                                                   | NA   | 1.196 | 7.47E-03 |
| MSMEG_4269 | asparagine synthase (glutamine-hydrolyzing)                                      | asnB | 1.022 | 5.38E-01 |
| MSMEG_4270 | adenosine kinase                                                                 | NA   | 0.991 | 6.97E-01 |
| MSMEG_4271 | conserved hypothetical protein                                                   | NA   | 1.013 | 8.79E-01 |
| MSMEG_4272 | HesB/YadR/YfhF family protein                                                    | NA   | 1.035 | 6.39E-01 |
| MSMEG_4273 | integral membrane protein                                                        | NA   | 1.025 | 6.25E-01 |
| MSMEG_4274 | Cobinamide kinase                                                                | cobU | 1.353 | 1.90E-01 |
| MSMEG_4275 | nicotinate-nucleotide--dimethylbenzimidazole phosphoribosyltransferase           | NA   | 1.076 | 5.20E-01 |
| MSMEG_4276 | branched-chain amino acid aminotransferase                                       | ilvE | 1.175 | 1.34E-01 |
| MSMEG_4277 | cobalamin 5'-phosphate synthase                                                  | cobS | 0.962 | 8.36E-01 |
| MSMEG_4278 | glycine cleavage system T protein                                                | gcvT | 0.939 | 1.17E-01 |
| MSMEG_4279 | adenylate and Guanylate cyclase catalytic domain protein                         | NA   | 1.026 | 4.72E-01 |
| MSMEG_4280 | short chain dehydrogenase                                                        | NA   | 0.970 | 9.01E-01 |
| MSMEG_4281 | cytosol aminopeptidase                                                           | NA   | 0.982 | 8.75E-01 |
| MSMEG_4282 | conserved hypothetical protein                                                   | NA   | 1.005 | 9.10E-01 |
| MSMEG_4283 | 2-oxoglutarate dehydrogenase, E2 component, dihydrolipoamide succinyltransferase | sucB | 0.999 | 9.90E-01 |
| MSMEG_4284 | conserved hypothetical protein                                                   | NA   | 1.197 | 6.42E-02 |
| MSMEG_4285 | lipoyltransferase                                                                | lipB | 0.936 | 5.52E-01 |
| MSMEG_4286 | lipoic acid synthetase                                                           | lipA | 0.854 | 1.09E-02 |
| MSMEG_4287 | integral membrane protein                                                        | NA   | 0.949 | 3.90E-01 |
| MSMEG_4288 | integral membrane protein                                                        | NA   | 0.880 | 3.89E-02 |
| MSMEG_4289 | amidohydrolase                                                                   | NA   | 1.263 | 3.61E-01 |
| MSMEG_4290 | glutamine synthetase, type I                                                     | glnA | 1.055 | 2.20E-01 |
| MSMEG_4291 | D-tyrosyl-tRNA(Tyr) deacylase                                                    | dtd  | 1.388 | 1.62E-02 |
| MSMEG_4292 | integral membrane protein                                                        | NA   | 1.086 | 3.24E-01 |

|            |                                                                                          |      |       |          |
|------------|------------------------------------------------------------------------------------------|------|-------|----------|
| MSMEG_4293 | glutamate-ammonia-ligase adenylyltransferase                                             | NA   | 1.232 | 1.33E-02 |
| MSMEG_4294 | glutamine synthetase, type I                                                             | glnA | 1.132 | 2.12E-02 |
| MSMEG_4295 | hydrolase, alpha/beta fold family protein                                                | NA   | 0.969 | 5.97E-01 |
| MSMEG_4296 | protease                                                                                 | NA   | 0.996 | 9.40E-01 |
| MSMEG_4297 | acyltransferase, ws/dgat/mgat subfamily protein                                          | NA   | 0.944 | 4.93E-01 |
| MSMEG_4298 | 3-methyl-2-oxobutanoate hydroxymethyltransferase                                         | panB | 0.990 | 9.27E-01 |
| MSMEG_4299 | enoyl-CoA hydratase/isomerase                                                            | NA   | 1.028 | 7.99E-01 |
| MSMEG_4300 | transcription regulator AmtR                                                             | NA   | 1.730 | 2.56E-02 |
| MSMEG_4301 | acyl-CoA synthase                                                                        | NA   | 1.222 | 1.99E-01 |
| MSMEG_4302 | adenylate cyclase, putative                                                              | NA   | 1.216 | 8.15E-02 |
| MSMEG_4303 | methyltransferase                                                                        | NA   | 1.936 | 3.01E-02 |
| MSMEG_4304 | regulatory protein                                                                       | NA   | 1.044 | 6.15E-01 |
| MSMEG_4305 | phosphoglycerate mutase                                                                  | NA   | 0.939 | 3.37E-01 |
| MSMEG_4306 | conserved hypothetical protein                                                           | NA   | 0.928 | 8.59E-02 |
| MSMEG_4307 | conserved hypothetical protein                                                           | NA   | 1.012 | 8.96E-01 |
| MSMEG_4308 | 5'-nucleotidase                                                                          | NA   | 1.388 | 4.39E-02 |
| MSMEG_4309 | Low molecular weight protein-tyrosine-phosphatase                                        | NA   | 1.321 | 7.68E-02 |
| MSMEG_4310 | cobalamin biosynthesis protein CobD                                                      | cobD | 1.134 | 2.55E-01 |
| MSMEG_4311 | conserved hypothetical protein                                                           | NA   | 1.173 | 1.13E-01 |
| MSMEG_4312 | conserved hypothetical protein; this gene contains a frame shift which is not the result | NA   | 0.765 | 4.27E-02 |
| MSMEG_4313 | glyoxalase/bleomycin resistance protein/dioxygenase                                      | NA   | 0.840 | 1.68E-01 |
| MSMEG_4314 | hypothetical protein                                                                     | NA   | 1.010 | 8.04E-01 |
| MSMEG_4315 | RNA polymerase sigma factor, sigma-70 family protein                                     | NA   | 0.803 | 2.66E-01 |
| MSMEG_4316 | methylated-DNA--protein-cysteine methyltransferase                                       | NA   | 1.327 | 5.94E-01 |
| MSMEG_4317 | conserved hypothetical protein                                                           | NA   | 0.918 | 4.13E-01 |
| MSMEG_4318 | hypothetical protein                                                                     | NA   | 1.178 | 6.87E-01 |
| MSMEG_4320 | alkyl hydroperoxide reductase/ Thiol specific antioxidant/ Mal allergen                  | NA   | 1.246 | 7.99E-02 |
| MSMEG_4321 | conserved hypothetical protein                                                           | NA   | 0.880 | 2.08E-02 |
| MSMEG_4322 | conserved hypothetical protein                                                           | NA   | 1.053 | 2.03E-01 |
| MSMEG_4323 | pyruvate dehydrogenase E1 component                                                      | NA   | 0.904 | 1.11E-01 |
| MSMEG_4324 | conserved hypothetical protein                                                           | NA   | 1.114 | 4.82E-01 |

|            |                                                    |      |       |          |
|------------|----------------------------------------------------|------|-------|----------|
| MSMEG_4325 | malonyl CoA-acyl carrier protein transacylase      | NA   | 0.744 | 6.48E-03 |
| MSMEG_4326 | acyl carrier protein                               | acpP | 0.919 | 3.02E-01 |
| MSMEG_4327 | 3-oxoacyl-[acyl-carrier-protein] synthase 1        | NA   | 0.801 | 7.78E-02 |
| MSMEG_4328 | 3-oxoacyl-[acyl-carrier-protein] synthase 2        | NA   | 0.830 | 4.54E-02 |
| MSMEG_4329 | propionyl-CoA carboxylase beta chain               | NA   | 0.631 | 3.63E-03 |
| MSMEG_4330 | short chain dehydrogenase                          | NA   | 1.103 | 2.48E-01 |
| MSMEG_4331 | putative transcriptional regulator                 | NA   | 1.113 | 5.58E-01 |
| MSMEG_4332 | glycerol-3-phosphate dehydrogenase 1               | NA   | 0.930 | 6.30E-01 |
| MSMEG_4333 | transcriptional regulator, TetR family protein     | NA   | 1.295 | 3.21E-02 |
| MSMEG_4334 | flavoprotein                                       | NA   | 1.385 | 2.41E-01 |
| MSMEG_4335 | conserved hypothetical protein                     | NA   | 1.050 | 6.62E-01 |
| MSMEG_4336 | conserved hypothetical protein                     | NA   | 1.052 | 7.62E-01 |
| MSMEG_4337 | beta-lactamase                                     | NA   | 1.034 | 6.77E-01 |
| MSMEG_4338 | possible transcriptional regulatory protein        | NA   | 1.037 | 6.53E-01 |
| MSMEG_4339 | tetratricopeptide repeat family protein            | NA   | 1.011 | 7.58E-01 |
| MSMEG_4340 | NAD/mycothiol-dependent formaldehyde dehydrogenase | NA   | 0.830 | 6.20E-02 |
| MSMEG_4341 | hypothetical protein                               | NA   | 1.489 | 4.52E-01 |
| MSMEG_4342 | metallo-beta-lactamase family protein              | NA   | 0.839 | 6.69E-02 |
| MSMEG_4343 | hypothetical protein                               | NA   | 1.254 | 1.71E-01 |
| MSMEG_4344 | putative monooxygenase                             | NA   | 1.046 | 7.86E-01 |
| MSMEG_4345 | conserved hypothetical protein                     | NA   | 1.438 | 3.62E-01 |
| MSMEG_4346 | conserved hypothetical protein                     | NA   | 1.056 | 3.04E-01 |
| MSMEG_4347 | conserved hypothetical protein                     | NA   | 1.114 | 2.33E-02 |
| MSMEG_4348 | acetolactate synthase large subunit                | NA   | 0.773 | 1.42E-01 |
| MSMEG_4349 | conserved hypothetical proline rich protein        | NA   | 0.910 | 3.41E-01 |
| MSMEG_4350 | dihydrodipicolinate reductase                      | dapB | 1.201 | 4.51E-01 |
| MSMEG_4351 | hypothetical oxidoreductase Yjgl                   | NA   | 2.049 | 1.91E-03 |
| MSMEG_4352 | putative secreted protein                          | NA   | 0.933 | 3.51E-01 |
| MSMEG_4353 | conserved hypothetical protein                     | NA   | 0.884 | 3.90E-02 |
| MSMEG_4354 | dipeptide-binding protein of ABC transport system  | NA   | 0.681 | 5.76E-03 |
| MSMEG_4355 | peptide ABC transporter, permease protein          | NA   | 1.086 | 1.85E-01 |

|            |                                                          |      |       |          |
|------------|----------------------------------------------------------|------|-------|----------|
| MSMEG_4356 | inner membrane ABC transporter permease protein YddQ     | NA   | 0.860 | 1.74E-01 |
| MSMEG_4357 | ABC transporter, ATP-binding protein                     | NA   | 0.960 | 8.06E-01 |
| MSMEG_4358 | D-beta-hydroxybutyrate dehydrogenase                     | NA   | 1.103 | 7.34E-02 |
| MSMEG_4359 | hypothetical protein                                     | NA   | 2.026 | 3.25E-01 |
| MSMEG_4360 | conserved hypothetical protein                           | NA   | 1.010 | 9.44E-01 |
| MSMEG_4361 | conserved hypothetical protein                           | NA   | 1.009 | 8.82E-01 |
| MSMEG_4362 | universal stress protein family protein                  | NA   | 1.094 | 1.11E-01 |
| MSMEG_4363 | conserved hypothetical protein                           | NA   | 1.007 | 9.31E-01 |
| MSMEG_4364 | hypothetical protein                                     | NA   | 1.218 | 1.70E-01 |
| MSMEG_4365 | conserved hypothetical protein                           | NA   | 1.114 | 5.56E-02 |
| MSMEG_4366 | serine/threonine-protein kinase PknD                     | NA   | 1.483 | 2.28E-01 |
| MSMEG_4367 | formamidase                                              | NA   | 0.950 | 5.76E-01 |
| MSMEG_4368 | putative regulatory protein, FmdB family protein         | NA   | 0.738 | 3.46E-03 |
| MSMEG_4369 | hypothetical protein                                     | NA   | 1.032 | 7.55E-01 |
| MSMEG_4370 | regulatory protein                                       | NA   | 1.258 | 1.64E-01 |
| MSMEG_4371 | vanillate O-demethylase oxidoreductase                   | NA   | 1.005 | 8.89E-01 |
| MSMEG_4372 | capreomycin hydroxylase                                  | NA   | 1.259 | 2.94E-01 |
| MSMEG_4373 | polysaccharide deacetylase, putative                     | NA   | 2.452 | 3.61E-01 |
| MSMEG_4374 | agmatinase                                               | speB | 1.299 | 6.96E-02 |
| MSMEG_4375 | 3-oxoacyl-[acyl carrier protein] reductase               | NA   | 1.633 | 2.29E-01 |
| MSMEG_4376 | 3-oxoacyl-[acyl-carrier-protein] reductase               | NA   | 1.036 | 2.71E-01 |
| MSMEG_4377 | amino acid permease family protein, putative             | NA   | 1.225 | 1.12E-01 |
| MSMEG_4378 | two-component system response regulator                  | NA   | 1.144 | 5.72E-01 |
| MSMEG_4379 | isochorismatase hydrolase                                | NA   | 0.912 | 5.35E-02 |
| MSMEG_4380 | ABC transporter, permease/ATP-binding protein            | NA   | 1.631 | 3.84E-01 |
| MSMEG_4381 | amidase                                                  | NA   | 0.771 | 1.30E-01 |
| MSMEG_4382 | dehydrogenase/reductase SDR family protein member 10     | NA   | 0.976 | 9.23E-01 |
| MSMEG_4383 | MmpL5 protein                                            | NA   | 1.083 | 4.45E-01 |
| MSMEG_4384 | Penicillin binding protein transpeptidase domain protein | NA   | 1.302 | 1.61E-01 |
| MSMEG_4385 | ABC transporter oligopeptide binding protein             | NA   | 1.330 | 4.80E-01 |
| MSMEG_4386 | ABC transporter permease protein                         | NA   | 1.047 | 5.21E-01 |

|            |                                                        |      |       |          |
|------------|--------------------------------------------------------|------|-------|----------|
| MSMEG_4387 | ABC transporter permease protein                       | NA   | 1.004 | 9.70E-01 |
| MSMEG_4388 | ABC transporter ATP-binding protein                    | NA   | 0.872 | 2.49E-01 |
| MSMEG_4389 | monooxygenase, NtaA/SnaA/SoxA family protein           | NA   | 1.129 | 5.19E-01 |
| MSMEG_4390 | hypothetical protein                                   | NA   | 0.965 | 6.93E-01 |
| MSMEG_4391 | acyl-CoA dehydrogenase-family protein                  | NA   | 1.203 | 4.11E-01 |
| MSMEG_4392 | organophosphate acid anhydrase                         | NA   | 1.424 | 4.00E-02 |
| MSMEG_4393 | carboxyvinyl-carboxyphosphonate phosphorylmutase       | NA   | 1.116 | 5.17E-01 |
| MSMEG_4394 | LysR family protein transcriptional regulatory protein | NA   | 0.897 | 1.43E-01 |
| MSMEG_4395 | excalibur domain family protein                        | NA   | 1.073 | 5.13E-01 |
| MSMEG_4396 | isochorismatase hydrolase                              | NA   | 0.626 | 1.97E-03 |
| MSMEG_4397 | transcriptional regulator, MerR family protein         | NA   | 1.053 | 3.73E-01 |
| MSMEG_4398 | conserved hypothetical protein                         | NA   | 1.215 | 2.41E-01 |
| MSMEG_4399 | conserved hypothetical protein                         | NA   | 0.883 | 2.84E-02 |
| MSMEG_4400 | alcohol dehydrogenase, zinc-containing                 | NA   | 1.171 | 2.13E-01 |
| MSMEG_4401 | phosphonoacetaldehyde hydrolase                        | NA   | 1.181 | 2.84E-01 |
| MSMEG_4404 | hypothetical protein                                   | NA   | 1.002 | 9.81E-01 |
| MSMEG_4405 | putative ECF sigma factor RpoE1                        | NA   | 1.182 | 5.20E-01 |
| MSMEG_4406 | UsfY protein                                           | NA   | 1.055 | 7.28E-01 |
| MSMEG_4407 | conserved hypothetical protein                         | NA   | 0.910 | 6.64E-01 |
| MSMEG_4408 | integral membrane protein                              | NA   | 1.050 | 7.36E-01 |
| MSMEG_4409 | hypothetical protein                                   | NA   | 1.283 | 3.10E-01 |
| MSMEG_4410 | hypothetical protein                                   | NA   | 1.173 | 6.46E-01 |
| MSMEG_4411 | oxidoreductase FAD-binding region                      | NA   | 1.185 | 7.26E-02 |
| MSMEG_4412 | oxidoreductase, molybdopterin binding                  | NA   | 2.279 | 2.99E-01 |
| MSMEG_4413 | hypothetical protein                                   | NA   | 1.074 | 5.03E-01 |
| MSMEG_4414 | conserved hypothetical protein                         | NA   | 0.975 | 8.12E-01 |
| MSMEG_4415 | transaldolase                                          | tal  | 1.066 | 6.23E-01 |
| MSMEG_4416 | hypothetical protein                                   | NA   | 1.111 | 3.25E-01 |
| MSMEG_4417 | methionine-S-sulfoxide reductase                       | msrA | 1.001 | 9.96E-01 |
| MSMEG_4418 | methionine-R-sulfoxide reductase                       | msrB | 0.944 | 6.31E-01 |
| MSMEG_4419 | glucose-1-dehydrogenase                                | NA   | 1.058 | 7.10E-01 |

|            |                                                                                     |      |       |          |
|------------|-------------------------------------------------------------------------------------|------|-------|----------|
| MSMEG_4420 | cupin 2, conserved barrel                                                           | NA   | 1.148 | 3.04E-01 |
| MSMEG_4421 | conserved hypothetical protein                                                      | NA   | 1.218 | 3.04E-01 |
| MSMEG_4422 | oxidoreductase                                                                      | NA   | 1.062 | 7.91E-01 |
| MSMEG_4423 | oxidoreductase                                                                      | NA   | 1.107 | 7.91E-01 |
| MSMEG_4424 | endoribonuclease L-PSP                                                              | NA   | 1.655 | 2.18E-01 |
| MSMEG_4425 | putative oxidoreductase                                                             | NA   | 1.053 | 7.27E-01 |
| MSMEG_4426 | secreted protein                                                                    | NA   | 0.972 | 9.08E-01 |
| MSMEG_4427 | transmembrane efflux pump                                                           | NA   | 1.157 | 5.06E-01 |
| MSMEG_4428 | conserved hypothetical protein                                                      | NA   | 1.190 | 4.13E-01 |
| MSMEG_4429 | hypothetical protein                                                                | NA   | 0.971 | 4.81E-01 |
| MSMEG_4430 | transcriptional regulator                                                           | NA   | 0.919 | 2.74E-01 |
| MSMEG_4431 | putative regulatory protein                                                         | NA   | 1.093 | 7.11E-01 |
| MSMEG_4432 | hypothetical protein                                                                | NA   | 1.165 | 3.78E-01 |
| MSMEG_4433 | dehydrogenase                                                                       | NA   | 0.993 | 9.22E-01 |
| MSMEG_4434 | Cof protein                                                                         | NA   | 1.064 | 6.45E-01 |
| MSMEG_4435 | dimethylmenaquinone methyltransferase                                               | NA   | 1.511 | 1.56E-01 |
| MSMEG_4436 | transketolase                                                                       | NA   | 1.490 | 3.58E-01 |
| MSMEG_4437 | cytochrome c oxidase, subunit I                                                     | ctaD | 2.588 | 4.36E-01 |
| MSMEG_4438 | hypothetical protein                                                                | NA   | 0.948 | 8.27E-01 |
| MSMEG_4439 | acetyltransferase                                                                   | NA   | 1.202 | 3.16E-02 |
| MSMEG_4440 | glucose-1-dehydrogenase                                                             | NA   | 1.014 | 9.37E-01 |
| MSMEG_4441 | cupin domain protein                                                                | NA   | 1.042 | 5.73E-01 |
| MSMEG_4442 | zinc-binding oxidoreductase                                                         | NA   | 1.342 | 5.59E-01 |
| MSMEG_4443 | hypothetical protein                                                                | NA   | 1.014 | 8.71E-01 |
| MSMEG_4444 | hypothetical protein                                                                | NA   | 1.134 | 5.68E-01 |
| MSMEG_4445 | hypothetical protein                                                                | NA   | 1.252 | 2.41E-01 |
| MSMEG_4446 | dihydrolipoamide dehydrogenase; this gene contains a premature stop which is not th | lpdA | 1.011 | 8.68E-01 |
| MSMEG_4447 | conserved hypothetical protein                                                      | NA   | 0.948 | 7.38E-01 |
| MSMEG_4448 | transcriptional modulator of MazE                                                   | NA   | 0.953 | 4.88E-01 |
| MSMEG_4449 | putative transcriptional regulator                                                  | NA   | 1.001 | 9.83E-01 |
| MSMEG_4450 | alpha/beta hydrolase                                                                | NA   | 1.227 | 2.93E-01 |

|            |                                                     |      |       |          |
|------------|-----------------------------------------------------|------|-------|----------|
| MSMEG_4451 | probable monooxygenase                              | NA   | 0.856 | 3.49E-01 |
| MSMEG_4453 | conserved hypothetical protein                      | NA   | 1.239 | 1.15E-01 |
| MSMEG_4454 | L-threonine aldolase, low-specificity               | ItaE | 1.279 | 1.47E-01 |
| MSMEG_4455 | beta-lactamase                                      | NA   | 0.841 | 1.77E-01 |
| MSMEG_4456 | conserved hypothetical protein                      | NA   | 0.834 | 6.53E-03 |
| MSMEG_4457 | regulatory protein, AsnC/Lrp                        | NA   | 1.370 | 5.10E-01 |
| MSMEG_4458 | transmembrane transport protein                     | NA   | 1.252 | 2.71E-01 |
| MSMEG_4459 | agmatinase                                          | speB | 1.042 | 7.57E-01 |
| MSMEG_4460 | acetolactate synthase                               | NA   | 0.919 | 3.13E-01 |
| MSMEG_4460 | acetolactate synthase                               | NA   | 1.130 | 3.03E-01 |
| MSMEG_4461 | conserved hypothetical integral membrane protein    | NA   | 1.170 | 3.89E-01 |
| MSMEG_4462 | sodium:solute symporter                             | NA   | 1.441 | 1.73E-01 |
| MSMEG_4463 | CalR5 protein                                       | NA   | 1.146 | 6.72E-01 |
| MSMEG_4464 | modulator of DNA gyrase                             | NA   | 1.051 | 8.31E-01 |
| MSMEG_4465 | cutinase                                            | NA   | 2.061 | 1.18E-02 |
| MSMEG_4466 | ABC transporter, permease protein UspA              | NA   | 1.165 | 6.80E-01 |
| MSMEG_4467 | ABC transporter, permease protein UspE              | NA   | 0.975 | 6.45E-01 |
| MSMEG_4468 | Bacterial extracellular solute-binding protein UspC | NA   | 1.065 | 6.75E-01 |
| MSMEG_4469 | cobalt transport protein                            | NA   | 1.239 | 9.56E-02 |
| MSMEG_4470 | ABC transporter                                     | NA   | 1.244 | 5.01E-02 |
| MSMEG_4471 | MarR-family protein transcriptional regulator       | NA   | 1.012 | 7.50E-01 |
| MSMEG_4472 | multidrug-efflux transporter protein                | NA   | 1.096 | 1.97E-01 |
| MSMEG_4473 | Integral membrane protein                           | NA   | 1.151 | 8.71E-02 |
| MSMEG_4474 | acyl-CoA oxidase                                    | NA   | 0.992 | 8.75E-01 |
| MSMEG_4475 | LppP protein                                        | NA   | 1.008 | 8.72E-01 |
| MSMEG_4476 | hypothetical protein                                | NA   | 0.805 | 5.70E-02 |
| MSMEG_4477 | hydrolase, alpha/beta hydrolase fold family protein | NA   | 1.503 | 1.73E-02 |
| MSMEG_4479 | conserved hypothetical protein                      | NA   | 1.260 | 2.22E-02 |
| MSMEG_4480 | conserved hypothetical protein                      | NA   | 0.976 | 5.69E-01 |
| MSMEG_4481 | hypothetical protein                                | NA   | 1.405 | 1.26E-04 |
| MSMEG_4482 | DNA primase                                         | NA   | 0.984 | 8.32E-01 |

|            |                                                |      |       |          |
|------------|------------------------------------------------|------|-------|----------|
| MSMEG_4483 | deoxyguanosinetriphosphate triphosphohydrolase | NA   | 1.096 | 2.25E-01 |
| MSMEG_4484 | putative conserved transmembrane protein       | NA   | 1.660 | 4.88E-01 |
| MSMEG_4485 | glycyl-tRNA synthetase                         | glyS | 0.997 | 9.44E-01 |
| MSMEG_4486 | transcriptional regulator, ArsR family protein | NA   | 0.975 | 6.14E-01 |
| MSMEG_4487 | ferric uptake regulation protein               | NA   | 1.039 | 5.76E-01 |
| MSMEG_4488 | hydrolase, nudix family protein                | NA   | 1.007 | 9.48E-01 |
| MSMEG_4489 | conserved hypothetical protein                 | NA   | 1.043 | 3.66E-01 |
| MSMEG_4490 | undecaprenyl diphosphate synthase              | uppS | 0.947 | 5.77E-02 |
| MSMEG_4491 | DNA repair protein RecO                        | recO | 0.968 | 4.72E-01 |
| MSMEG_4492 | amidase                                        | NA   | 1.000 | 9.94E-01 |
| MSMEG_4493 | GTP-binding protein Era                        | era  | 1.360 | 4.76E-02 |
| MSMEG_4494 | conserved hypothetical protein                 | NA   | 1.102 | 3.89E-01 |
| MSMEG_4495 | CBS domain protein                             | NA   | 1.081 | 4.51E-01 |
| MSMEG_4496 | conserved hypothetical protein                 | NA   | 1.020 | 7.59E-01 |
| MSMEG_4497 | PhoH family protein                            | NA   | 1.026 | 5.15E-01 |
| MSMEG_4498 | hypothetical protein                           | NA   | 1.487 | 2.31E-01 |
| MSMEG_4499 | hypothetical protein                           | NA   | 2.582 | 8.64E-03 |
| MSMEG_4500 | hypothetical protein                           | NA   | 1.222 | 5.82E-01 |
| MSMEG_4501 | sodium:dicarboxylate symporter                 | NA   | 1.144 | 3.16E-01 |
| MSMEG_4502 | conserved hypothetical protein                 | NA   | 1.185 | 1.32E-01 |
| MSMEG_4503 | hypothetical protein                           | NA   | 1.310 | 4.71E-01 |
| MSMEG_4504 | chaperone protein DnaJ                         | dnaJ | 1.067 | 4.96E-01 |
| MSMEG_4505 | heat-inducible transcription repressor HrcA    | hrcA | 1.111 | 5.52E-02 |
| MSMEG_4506 | hypothetical protein                           | NA   | 1.085 | 6.37E-01 |
| MSMEG_4507 | conserved hypothetical protein                 | NA   | 1.025 | 7.48E-01 |
| MSMEG_4508 | conserved domain protein                       | NA   | 1.040 | 3.40E-01 |
| MSMEG_4509 | MbtG protein                                   | NA   | 1.354 | 2.83E-01 |
| MSMEG_4510 | peptide synthetase mbtf                        | NA   | 1.114 | 3.39E-01 |
| MSMEG_4511 | linear gramicidin synthetase subunit B         | NA   | 1.166 | 4.79E-01 |
| MSMEG_4512 | polyketide synthetase mbtd                     | NA   | 0.872 | 2.28E-01 |
| MSMEG_4513 | polyketide synthase                            | NA   | 1.131 | 6.93E-01 |



|            |                                                                      |      |       |          |
|------------|----------------------------------------------------------------------|------|-------|----------|
| MSMEG_4514 | Thioesterase domain protein                                          | NA   | 1.053 | 3.11E-01 |
| MSMEG_4515 | putative non-ribosomal peptide synthetase                            | NA   | 1.919 | 3.32E-01 |
| MSMEG_4516 | 2,3-dihydroxybenzoate-AMP ligase                                     | NA   | 1.215 | 2.45E-01 |
| MSMEG_4517 | TetR-type transcriptional regulator of sulfur metabolism             | NA   | 1.071 | 7.00E-01 |
| MSMEG_4518 | conserved hypothetical protein                                       | NA   | 0.978 | 9.37E-01 |
| MSMEG_4519 | NrtC protein                                                         | NA   | 1.029 | 8.88E-01 |
| MSMEG_4520 | sulfate/thiosulfate import ATP-binding protein CysA                  | NA   | 1.294 | 1.62E-01 |
| MSMEG_4521 | Tat (twin-arginine translocation) pathway signal sequence            | NA   | 0.951 | 1.01E-01 |
| MSMEG_4522 | ISMsm2, transposase                                                  | NA   | 0.957 | 2.50E-01 |
| MSMEG_4522 | ISMsm2, transposase                                                  | NA   | 1.018 | 6.00E-01 |
| MSMEG_4523 | binding-protein-dependent transport systems inner membrane component | NA   | 1.060 | 4.53E-01 |
| MSMEG_4524 | anthranilate synthase component I                                    | NA   | 1.410 | 5.35E-01 |
| MSMEG_4525 | putative oxygen-independent coproporphyrinogen III oxidase           | NA   | 1.379 | 2.79E-02 |
| MSMEG_4526 | hypothetical protein                                                 | NA   | 1.149 | 3.69E-01 |
| MSMEG_4527 | ferredoxin sulfite reductase                                         | NA   | 1.473 | 8.93E-02 |
| MSMEG_4528 | phosphoadenosine phosphosulfate reductase                            | NA   | 1.490 | 5.03E-02 |
| MSMEG_4529 | secreted protein                                                     | NA   | 1.482 | 5.84E-02 |
| MSMEG_4530 | sulfate ABC transporter, ATP-binding protein                         | cysA | 1.154 | 5.16E-01 |
| MSMEG_4531 | sulfate ABC transporter, permease protein CysW                       | cysW | 0.997 | 9.67E-01 |
| MSMEG_4532 | sulfate ABC transporter, permease protein CysT                       | cysT | 0.961 | 7.77E-01 |
| MSMEG_4533 | sulfate-binding protein                                              | NA   | 0.918 | 2.28E-01 |
| MSMEG_4534 | putative conserved membrane protein                                  | NA   | 1.059 | 4.15E-01 |
| MSMEG_4535 | glycoside hydrolase                                                  | NA   | 1.324 | 1.71E-02 |
| MSMEG_4536 | conserved hypothetical protein                                       | NA   | 1.278 | 5.99E-03 |
| MSMEG_4537 | major membrane protein I                                             | NA   | 0.796 | 3.34E-02 |
| MSMEG_4538 | cysteine desulphurase, SufS                                          | NA   | 1.037 | 7.80E-01 |
| MSMEG_4539 | alkanesulfonate monooxygenase                                        | NA   | 1.465 | 1.43E-01 |
| MSMEG_4540 | acetyltransferase, gnat family protein                               | NA   | 1.417 | 1.14E-02 |
| MSMEG_4541 | ABC transporter, ATP-binding protein                                 | NA   | 1.109 | 3.66E-01 |
| MSMEG_4542 | oligopeptide transport integral membrane protein                     | NA   | 0.956 | 7.47E-01 |
| MSMEG_4543 | ABC transporter system integral membrane protein                     | NA   | 1.234 | 3.67E-01 |

|            |                                                                                                               |      |       |          |
|------------|---------------------------------------------------------------------------------------------------------------|------|-------|----------|
| MSMEG_4544 | methyltransferase small domain superfamily protein                                                            | NA   | 1.300 | 6.76E-02 |
| MSMEG_4545 | bacterial extracellular solute-binding protein, family protein 5                                              | NA   | 0.949 | 7.26E-01 |
| MSMEG_4546 | oxidoreductase; this gene contains a frame shift which is not the result of sequencing                        | NA   | 1.610 | 5.19E-02 |
| MSMEG_4547 | acyl-CoA dehydrogenase family protein                                                                         | NA   | 1.185 | 4.64E-01 |
| MSMEG_4548 | acetyltransferase, gnat family protein                                                                        | NA   | 0.969 | 7.86E-01 |
| MSMEG_4549 | amino acid permease-associated region, putative                                                               | NA   | 0.958 | 7.35E-01 |
| MSMEG_4551 | monooxygenase                                                                                                 | NA   | 1.047 | 8.57E-01 |
| MSMEG_4552 | nitrilotriacetate monooxygenase component A                                                                   | ssuD | 1.694 | 2.12E-01 |
| MSMEG_4553 | GAF domain, putative                                                                                          | NA   | 0.942 | 2.00E-01 |
| MSMEG_4554 | probable serine/threonine-protein kinase PknH, putative                                                       | NA   | 1.686 | 6.64E-02 |
| MSMEG_4555 | LppR protein                                                                                                  | NA   | 1.171 | 2.57E-01 |
| MSMEG_4556 | GTP-binding protein LepA                                                                                      | lepA | 1.114 | 2.09E-02 |
| MSMEG_4557 | ABC transporter, ATP-binding protein                                                                          | NA   | 0.835 | 1.76E-01 |
| MSMEG_4558 | conserved hypothetical protein                                                                                | NA   | 1.123 | 2.53E-01 |
| MSMEG_4559 | ABC transporter, membrane spanning protein                                                                    | NA   | 0.906 | 5.52E-01 |
| MSMEG_4560 | periplasmic binding protein                                                                                   | NA   | 1.006 | 9.68E-01 |
| MSMEG_4561 | ABC Fe <sup>3+</sup> -siderophores transporter, periplasmic binding protein                                   | NA   | 0.984 | 9.15E-01 |
| MSMEG_4562 | conserved hypothetical protein; this gene contains a frame shift which is not the result of sequencing        | NA   | 1.284 | 1.62E-01 |
| MSMEG_4563 | puromycin N-acetyltransferase                                                                                 | NA   | 0.893 | 1.86E-02 |
| MSMEG_4564 | CBS domain protein                                                                                            | NA   | 1.014 | 8.23E-01 |
| MSMEG_4565 | oxidoreductase                                                                                                | NA   | 1.162 | 6.60E-01 |
| MSMEG_4566 | conserved 13e12 repeat family protein; this gene contains a frame shift which is not the result of sequencing | NA   | 0.769 | 1.08E-01 |
| MSMEG_4566 | conserved 13e12 repeat family protein; this gene contains a frame shift which is not the result of sequencing | NA   | 1.117 | 1.23E-01 |
| MSMEG_4567 | conserved hypothetical protein                                                                                | NA   | 1.049 | 3.14E-01 |
| MSMEG_4568 | ribonuclease Z                                                                                                | NA   | 1.189 | 5.92E-01 |
| MSMEG_4569 | conserved hypothetical protein                                                                                | NA   | 1.151 | 1.00E-01 |
| MSMEG_4570 | conserved hypothetical protein                                                                                | NA   | 1.091 | 5.46E-01 |
| MSMEG_4571 | ribosomal protein S20                                                                                         | rpsT | 1.011 | 9.21E-01 |
| MSMEG_4572 | DNA polymerase III, delta subunit                                                                             | NA   | 3.983 | 1.93E-01 |
| MSMEG_4573 | competence protein                                                                                            | NA   | 1.311 | 3.03E-01 |
| MSMEG_4574 | DNA-binding protein                                                                                           | NA   | 1.253 | 3.92E-01 |

|            |                                                                                          |      |       |          |
|------------|------------------------------------------------------------------------------------------|------|-------|----------|
| MSMEG_4575 | hypothetical protein                                                                     | NA   | 0.969 | 7.80E-01 |
| MSMEG_4576 | SpfH domain protein                                                                      | NA   | 0.991 | 9.11E-01 |
| MSMEG_4577 | DegV family protein                                                                      | NA   | 0.963 | 7.49E-01 |
| MSMEG_4578 | conserved hypothetical protein                                                           | NA   | 1.056 | 6.61E-01 |
| MSMEG_4579 | phosphoglycerate mutase family protein                                                   | NA   | 0.977 | 3.00E-01 |
| MSMEG_4580 | conserved domain protein                                                                 | NA   | 0.913 | 1.98E-03 |
| MSMEG_4581 | nicotinate (nicotinamide) nucleotide adenyltransferase                                   | nadD | 0.929 | 1.06E-01 |
| MSMEG_4582 | conserved hypothetical protein                                                           | NA   | 0.642 | 9.63E-02 |
| MSMEG_4582 | conserved hypothetical protein                                                           | NA   | 1.097 | 2.20E-01 |
| MSMEG_4583 | ATPase associated with various cellular activities                                       | NA   | 0.854 | 1.86E-02 |
| MSMEG_4584 | gamma-glutamyl phosphate reductase                                                       | proA | 0.939 | 5.81E-01 |
| MSMEG_4585 | ribokinase                                                                               | rbsK | 1.148 | 2.45E-01 |
| MSMEG_4586 | ABC nitrate/sulfonate/bicarbonate family protein transporter, periplasmic ligand binding | NA   | 0.781 | 9.22E-02 |
| MSMEG_4587 | putative aliphatic sulfonates transport ATP-binding protein SsuB                         | NA   | 1.090 | 5.41E-01 |
| MSMEG_4588 | ABC nitrate/sulfonate/bicarbonate family protein transporter, inner membrane subunit     | NA   | 0.894 | 4.95E-01 |
| MSMEG_4589 | rhodanese domain protein/cystathionine beta-lyase                                        | NA   | 0.893 | 5.50E-01 |
| MSMEG_4590 | nitrilotriacetate monooxygenase component A                                              | ssuD | 0.914 | 6.69E-01 |
| MSMEG_4591 | hypothetical protein                                                                     | NA   | 1.205 | 1.68E-01 |
| MSMEG_4592 | acyl-CoA dehydrogenase family protein                                                    | NA   | 1.241 | 1.43E-01 |
| MSMEG_4593 | acyl-CoA dehydrogenase                                                                   | NA   | 0.951 | 6.18E-01 |
| MSMEG_4594 | hypothetical protein                                                                     | NA   | 1.085 | 3.31E-02 |
| MSMEG_4595 | probable serine/threonine-protein kinase PknH, putative                                  | NA   | 0.784 | 2.60E-03 |
| MSMEG_4596 | hypothetical protein                                                                     | NA   | 0.678 | 2.01E-02 |
| MSMEG_4597 | putative conserved lipoprotein lppH                                                      | lppH | 0.977 | 6.72E-01 |
| MSMEG_4598 | putative conserved lipoprotein lppH                                                      | lppH | 0.935 | 3.79E-02 |
| MSMEG_4599 | hypothetical protein                                                                     | NA   | 0.980 | 7.90E-01 |
| MSMEG_4600 | hypothetical protein                                                                     | NA   | 0.863 | 1.10E-01 |
| MSMEG_4601 | transcriptional regulator, AraC family protein                                           | NA   | 1.100 | 4.57E-02 |
| MSMEG_4602 | hypothetical protein                                                                     | NA   | 0.732 | 2.24E-02 |
| MSMEG_4603 | integral membrane protein; this gene contains a frame shift which is not the result of a | NA   | 1.488 | 1.35E-01 |
| MSMEG_4604 | hypothetical protein                                                                     | NA   | 1.077 | 3.66E-01 |

|            |                                                                                                                     |      |       |          |
|------------|---------------------------------------------------------------------------------------------------------------------|------|-------|----------|
| MSMEG_4605 | ankyrin; this gene contains a premature stop which is not the result of sequencing error                            | NA   | 0.938 | 6.34E-01 |
| MSMEG_4605 | ankyrin; this gene contains a premature stop which is not the result of sequencing error                            | NA   | 0.964 | 8.01E-01 |
| MSMEG_4606 | hypothetical protein                                                                                                | NA   | 0.954 | 5.38E-01 |
| MSMEG_4606 | hypothetical protein                                                                                                | NA   | 1.536 | 3.14E-01 |
| MSMEG_4607 | hypothetical protein                                                                                                | NA   | 0.925 | 7.56E-01 |
| MSMEG_4609 | transcriptional regulator LysR family protein                                                                       | NA   | 1.383 | 4.08E-02 |
| MSMEG_4610 | IgiC, putative                                                                                                      | NA   | 1.227 | 2.55E-01 |
| MSMEG_4611 | carrier protein                                                                                                     | NA   | 1.076 | 3.27E-01 |
| MSMEG_4612 | conserved hypothetical protein; this gene contains a frame shift which is not the result of sequencing error        | NA   | 0.851 | 1.09E-01 |
| MSMEG_4612 | conserved hypothetical protein; this gene contains a frame shift which is not the result of sequencing error        | NA   | 0.993 | 9.51E-01 |
| MSMEG_4613 | hypothetical protein                                                                                                | NA   | 0.940 | 4.89E-01 |
| MSMEG_4614 | GAF family protein                                                                                                  | NA   | 1.002 | 9.83E-01 |
| MSMEG_4615 | replicative DNA helicase; this region contains one or more premature stops and/or frame shifts                      | NA   | 1.051 | 8.97E-02 |
| MSMEG_4615 | replicative DNA helicase; this region contains one or more premature stops and/or frame shifts                      | NA   | 1.209 | 2.81E-02 |
| MSMEG_4616 | acyl-CoA dehydrogenase family protein; this gene contains a frame shift which is not the result of sequencing error | NA   | 1.124 | 2.32E-01 |
| MSMEG_4617 | glutamine-dependent NAD <sup>+</sup> synthetase                                                                     | nadE | 1.254 | 1.30E-01 |
| MSMEG_4618 | isochorismatase family protein                                                                                      | NA   | 1.220 | 5.54E-01 |
| MSMEG_4619 | putative cytochrome P450 126                                                                                        | NA   | 1.049 | 5.95E-01 |
| MSMEG_4620 | NAD-dependent deacetylase 1                                                                                         | NA   | 1.008 | 9.07E-01 |
| MSMEG_4621 | glutamate 5-kinase                                                                                                  | proB | 1.549 | 3.54E-02 |
| MSMEG_4622 | transcriptional regulator, TetR family protein                                                                      | NA   | 0.993 | 9.65E-01 |
| MSMEG_4623 | GTP-binding protein Obg/CgtA                                                                                        | NA   | 1.471 | 7.86E-02 |
| MSMEG_4624 | ribosomal protein L27                                                                                               | rpmA | 1.133 | 7.67E-02 |
| MSMEG_4625 | ribosomal protein L21                                                                                               | rplU | 1.149 | 4.40E-01 |
| MSMEG_4626 | ribonuclease, Rne/Rng family protein                                                                                | NA   | 0.937 | 2.58E-01 |
| MSMEG_4627 | nucleoside diphosphate kinase                                                                                       | NA   | 0.904 | 1.87E-01 |
| MSMEG_4628 | conserved hypothetical protein                                                                                      | NA   | 1.138 | 1.18E-01 |
| MSMEG_4629 | FoIC bifunctional protein; this gene contains a frame shift which is not the result of sequencing error             | foIC | 1.062 | 1.50E-01 |
| MSMEG_4630 | valyl-tRNA synthetase                                                                                               | valS | 1.299 | 2.35E-02 |
| MSMEG_4631 | conserved hypothetical protein                                                                                      | NA   | 0.899 | 2.55E-01 |
| MSMEG_4632 | saccharopine dehydrogenase                                                                                          | NA   | 1.145 | 2.57E-02 |

|            |                                                            |     |       |          |
|------------|------------------------------------------------------------|-----|-------|----------|
| MSMEG_4633 | peptidase S9, prolyl oligopeptidase                        | NA  | 1.173 | 1.54E-01 |
| MSMEG_4634 | hypothetical protein                                       | NA  | 1.109 | 4.58E-01 |
| MSMEG_4635 | ammonium transporter family protein                        | NA  | 1.036 | 8.83E-01 |
| MSMEG_4636 | hypothetical protein                                       | NA  | 1.064 | 6.78E-01 |
| MSMEG_4637 | conserved hypothetical protein                             | NA  | 1.074 | 3.85E-01 |
| MSMEG_4638 | vanillate O-demethylase oxidoreductase                     | NA  | 1.520 | 3.92E-01 |
| MSMEG_4639 | conserved hypothetical protein                             | NA  | 1.119 | 7.19E-01 |
| MSMEG_4640 | secreted protein                                           | NA  | 1.347 | 1.51E-01 |
| MSMEG_4641 | salicylate hydroxylase                                     | NA  | 1.111 | 3.03E-01 |
| MSMEG_4642 | hypothetical protein                                       | NA  | 1.044 | 6.14E-01 |
| MSMEG_4643 | resuscitation-promoting factor                             | NA  | 2.468 | 5.53E-02 |
| MSMEG_4644 | molybdopterin-guanine dinucleotide biosynthesis protein A  | NA  | 1.167 | 2.04E-01 |
| MSMEG_4645 | alpha oxoglutarate ferredoxin oxidoreductase, beta subunit | orB | 1.077 | 4.03E-01 |
| MSMEG_4646 | pyruvate synthase                                          | NA  | 1.172 | 7.58E-03 |
| MSMEG_4647 | carbohydrate kinase, PfkB, putative                        | NA  | 1.236 | 8.95E-03 |
| MSMEG_4648 | DNA-binding protein                                        | NA  | 1.050 | 7.93E-01 |
| MSMEG_4649 | phytanoyl-CoA dioxygenase                                  | NA  | 1.109 | 7.24E-01 |
| MSMEG_4650 | hypothetical oxidoreductase YisS                           | NA  | 0.897 | 6.02E-01 |
| MSMEG_4651 | AP endonuclease, family protein 2                          | NA  | 0.862 | 1.65E-01 |
| MSMEG_4652 | D-oliose 4-ketoreductase                                   | NA  | 0.936 | 5.25E-04 |
| MSMEG_4653 | AP endonuclease, family protein 2 superfamily protein      | NA  | 1.045 | 5.37E-01 |
| MSMEG_4654 | aldo/keto reductase                                        | NA  | 1.025 | 8.16E-01 |
| MSMEG_4655 | transcriptional regulator, AraC family protein             | NA  | 1.190 | 1.89E-01 |
| MSMEG_4656 | sugar ABC transporter ATP-binding protein                  | NA  | 0.728 | 9.08E-03 |
| MSMEG_4657 | ABC transporter membrane protein                           | NA  | 0.706 | 1.60E-02 |
| MSMEG_4658 | sugar ABC transporter substrate-binding protein            | NA  | 0.672 | 4.33E-04 |
| MSMEG_4659 | GntR-family protein transcriptional regulator              | NA  | 1.027 | 6.78E-01 |
| MSMEG_4660 | hypothetical protein                                       | NA  | 0.874 | 3.38E-01 |
| MSMEG_4661 | sugar kinase, ribokinase family protein                    | NA  | 0.682 | 1.02E-02 |
| MSMEG_4662 | deoxyribose-phosphate aldolase superfamily protein         | NA  | 0.787 | 1.67E-01 |
| MSMEG_4663 | protein lolB                                               | NA  | 0.562 | 1.88E-03 |

|            |                                                             |      |       |          |
|------------|-------------------------------------------------------------|------|-------|----------|
| MSMEG_4664 | loID protein                                                | NA   | 0.655 | 4.17E-02 |
| MSMEG_4665 | loIE protein                                                | NA   | 0.767 | 4.81E-03 |
| MSMEG_4666 | myo-inositol 2-dehydrogenase                                | NA   | 0.947 | 8.33E-01 |
| MSMEG_4667 | transcriptional regulator, LysR family protein              | NA   | 0.995 | 9.34E-01 |
| MSMEG_4668 | oxidoreductase alpha (molybdopterin) subunit                | NA   | 1.043 | 5.54E-01 |
| MSMEG_4669 | formate dehydrogenase family protein accessory protein FdhD | fdhD | 1.019 | 9.23E-01 |
| MSMEG_4670 | N-glycosylation                                             | NA   | 0.610 | 6.76E-02 |
| MSMEG_4671 | ATP-dependent Clp protease, ATP-binding subunit ClpX        | clpX | 1.042 | 3.77E-01 |
| MSMEG_4672 | Clp protease                                                | clpP | 1.059 | 4.35E-01 |
| MSMEG_4673 | Clp protease                                                | clpP | 0.956 | 5.60E-02 |
| MSMEG_4674 | trigger factor                                              | tig  | 1.025 | 1.75E-01 |
| MSMEG_4677 | hypothetical protein                                        | NA   | 1.360 | 2.10E-01 |
| MSMEG_4678 | hypothetical protein                                        | NA   | 0.782 | 3.52E-03 |
| MSMEG_4679 | hypothetical protein                                        | NA   | 1.008 | 8.33E-01 |
| MSMEG_4680 | carboxylesterase, putative                                  | lipP | 1.153 | 2.93E-01 |
| MSMEG_4681 | conserved hypothetical protein                              | NA   | 1.266 | 6.15E-03 |
| MSMEG_4682 | Na <sup>+</sup> /H <sup>+</sup> antiporter                  | NA   | 1.066 | 4.02E-01 |
| MSMEG_4683 | putative formamidopyrimidine-DNA glycosylase                | NA   | 0.920 | 3.89E-01 |
| MSMEG_4684 | ribose 5-phosphate isomerase                                | NA   | 0.820 | 4.82E-03 |
| MSMEG_4685 | oxidoreductase                                              | NA   | 0.979 | 8.15E-01 |
| MSMEG_4686 | putative oxidoreductase YdbC                                | NA   | 1.098 | 2.94E-01 |
| MSMEG_4687 | cytosine deaminase                                          | NA   | 1.071 | 1.35E-01 |
| MSMEG_4688 | conserved hypothetical protein, putative                    | NA   | 1.101 | 2.81E-01 |
| MSMEG_4689 | conserved hypothetical protein                              | NA   | 0.845 | 8.30E-02 |
| MSMEG_4690 | aminopeptidase N                                            | pepN | 0.991 | 9.52E-01 |
| MSMEG_4691 | HNH nuclease                                                | NA   | 1.307 | 2.44E-02 |
| MSMEG_4692 | conserved hypothetical protein                              | NA   | 1.217 | 2.89E-01 |
| MSMEG_4693 | conserved hypothetical protein                              | NA   | 1.150 | 9.43E-02 |
| MSMEG_4694 | HNH endonuclease family protein                             | NA   | 1.382 | 6.36E-02 |
| MSMEG_4695 | protozoan/cyanobacterial globin family protein              | NA   | 1.070 | 1.52E-01 |
| MSMEG_4696 | alpha-amylase family protein                                | NA   | 0.736 | 6.03E-03 |

|            |                                                       |    |       |          |
|------------|-------------------------------------------------------|----|-------|----------|
| MSMEG_4697 | conserved hypothetical protein                        | NA | 1.190 | 1.73E-01 |
| MSMEG_4698 | conserved hypothetical protein                        | NA | 1.014 | 6.37E-01 |
| MSMEG_4699 | NAD-glutamate dehydrogenase                           | NA | 1.026 | 6.73E-01 |
| MSMEG_4700 | ABC-transporter protein, ATP binding component        | NA | 1.152 | 6.02E-02 |
| MSMEG_4701 | single-strand binding protein                         | NA | 1.700 | 1.11E-02 |
| MSMEG_4702 | ABC-type transporter, permease components             | NA | 1.414 | 5.07E-03 |
| MSMEG_4703 | glycerol-3-phosphate acyltransferase                  | NA | 0.745 | 1.30E-01 |
| MSMEG_4704 | acyltransferase family protein                        | NA | 1.017 | 8.46E-01 |
| MSMEG_4705 | acyltransferase, ws/dgat/mgat subfamily protein       | NA | 1.076 | 5.03E-01 |
| MSMEG_4707 | non-heme bromoperoxidase BPO-A2                       | NA | 1.678 | 2.98E-01 |
| MSMEG_4708 | putative methyltransferase                            | NA | 0.814 | 1.23E-01 |
| MSMEG_4709 | enoyl-CoA hydratase                                   | NA | 1.071 | 2.04E-01 |
| MSMEG_4710 | dihydrolipoamide acetyltransferase                    | NA | 0.933 | 4.71E-01 |
| MSMEG_4711 | pyruvate dehydrogenase E1 component subunit beta      | NA | 0.985 | 9.34E-01 |
| MSMEG_4712 | pyruvate dehydrogenase E1 component, alpha subunit    | NA | 0.824 | 2.99E-02 |
| MSMEG_4713 | HpcH/HpaI aldolase/citrate lyase family protein       | NA | 0.734 | 1.38E-02 |
| MSMEG_4714 | MoaC domain protein                                   | NA | 0.750 | 1.43E-02 |
| MSMEG_4715 | acyl-CoA dehydrogenase                                | NA | 0.764 | 2.48E-02 |
| MSMEG_4716 | acetyl-/propionyl-coenzyme A carboxylase alpha chain  | NA | 0.864 | 9.20E-02 |
| MSMEG_4717 | Carboxyl transferase domain protein                   | NA | 0.924 | 2.97E-01 |
| MSMEG_4718 | transcriptional regulator, TetR family protein        | NA | 1.103 | 1.56E-01 |
| MSMEG_4719 | peptidase S9, prolyl oligopeptidase                   | NA | 1.083 | 2.93E-01 |
| MSMEG_4720 | conserved hypothetical protein                        | NA | 1.130 | 4.07E-02 |
| MSMEG_4721 | permease of the major facilitator superfamily protein | NA | 1.179 | 1.69E-01 |
| MSMEG_4722 | short-chain dehydrogenase                             | NA | 1.216 | 5.57E-02 |
| MSMEG_4723 | conserved hypothetical protein                        | NA | 0.876 | 1.48E-01 |
| MSMEG_4724 | oligoribonuclease                                     | NA | 1.087 | 2.92E-01 |
| MSMEG_4726 | carbamoyl-phosphate synthase small chain              | NA | 1.078 | 6.99E-01 |
| MSMEG_4727 | mycocerosic acid synthase                             | NA | 1.561 | 1.78E-01 |
| MSMEG_4728 | condensation domain protein                           | NA | 0.856 | 2.37E-03 |
| MSMEG_4729 | conserved hypothetical protein                        | NA | 1.168 | 1.90E-01 |

|            |                                                                                      |      |       |          |
|------------|--------------------------------------------------------------------------------------|------|-------|----------|
| MSMEG_4730 | conserved hypothetical protein                                                       | NA   | 0.840 | 1.30E-01 |
| MSMEG_4730 | conserved hypothetical protein                                                       | NA   | 1.044 | 6.31E-01 |
| MSMEG_4731 | acyl-CoA synthase                                                                    | NA   | 1.120 | 3.79E-01 |
| MSMEG_4732 | glycosyl transferase, group 2 family protein, putative                               | NA   | 1.040 | 6.71E-01 |
| MSMEG_4733 | putative membrane protein                                                            | NA   | 1.057 | 4.77E-01 |
| MSMEG_4734 | hypothetical protein                                                                 | NA   | 1.212 | 2.07E-01 |
| MSMEG_4735 | conserved hypothetical protein                                                       | NA   | 1.258 | 5.92E-02 |
| MSMEG_4736 | conserved hypothetical protein                                                       | NA   | 1.415 | 5.52E-02 |
| MSMEG_4737 | conserved hypothetical protein                                                       | NA   | 1.127 | 2.17E-02 |
| MSMEG_4738 | hypothetical protein                                                                 | NA   | 1.652 | 8.44E-04 |
| MSMEG_4739 | conserved hypothetical protein                                                       | NA   | 1.195 | 1.64E-01 |
| MSMEG_4740 | Glycosyltransferase family protein 28                                                | NA   | 1.118 | 5.14E-02 |
| MSMEG_4741 | MmpL protein                                                                         | NA   | 1.194 | 5.92E-02 |
| MSMEG_4742 | clavaldehyde dehydrogenase                                                           | NA   | 0.800 | 6.71E-03 |
| MSMEG_4743 | conserved hypothetical protein                                                       | NA   | 1.009 | 9.45E-01 |
| MSMEG_4744 | conserved hypothetical protein                                                       | NA   | 0.951 | 6.78E-01 |
| MSMEG_4745 | ErfK/YbiS/YcfS/YnhG family protein                                                   | NA   | 1.146 | 6.32E-03 |
| MSMEG_4747 | hypothetical protein                                                                 | NA   | 1.175 | 6.45E-01 |
| MSMEG_4748 | hypothetical protein                                                                 | NA   | 1.045 | 8.64E-01 |
| MSMEG_4749 | hypothetical protein                                                                 | NA   | 2.301 | 6.61E-02 |
| MSMEG_4750 | ornithine carbamoyltransferase                                                       | NA   | 1.728 | 1.71E-02 |
| MSMEG_4751 | hypothetical protein                                                                 | NA   | 1.095 | 3.86E-01 |
| MSMEG_4752 | conserved hypothetical protein                                                       | NA   | 1.235 | 3.79E-01 |
| MSMEG_4753 | antioxidant, AhpC/TSA family protein                                                 | NA   | 0.822 | 9.82E-02 |
| MSMEG_4754 | K <sup>+</sup> -dependent Na <sup>+</sup> /Ca <sup>+</sup> exchanger related-protein | NA   | 1.289 | 1.31E-01 |
| MSMEG_4755 | peptidase M20                                                                        | NA   | 1.274 | 7.16E-02 |
| MSMEG_4756 | holo-(acyl-carrier-protein) synthase                                                 | acpS | 1.157 | 2.13E-01 |
| MSMEG_4757 | fatty acid synthase                                                                  | NA   | 1.093 | 5.96E-01 |
| MSMEG_4759 | hypothetical protein                                                                 | NA   | 0.913 | 4.33E-01 |
| MSMEG_4759 | hypothetical protein                                                                 | NA   | 1.029 | 8.38E-01 |
| MSMEG_4760 | conserved hypothetical protein; this region contains one or more premature stops anc | NA   | 3.092 | 3.89E-01 |



|            |                                                                                       |      |       |          |
|------------|---------------------------------------------------------------------------------------|------|-------|----------|
| MSMEG_4761 | ABC transporter ATP-binding protein                                                   | NA   | 1.064 | 2.54E-01 |
| MSMEG_4762 | ABC transporter binding protein                                                       | NA   | 1.027 | 8.83E-01 |
| MSMEG_4763 | ABC transporter permease protein                                                      | NA   | 1.032 | 8.54E-01 |
| MSMEG_4764 | ABC transporter permease protein                                                      | NA   | 0.906 | 5.30E-01 |
| MSMEG_4765 | transcriptional regulator, MerR family protein                                        | NA   | 1.409 | 4.42E-02 |
| MSMEG_4766 | low temperature requirement protein LtrA                                              | ltrA | 1.256 | 1.98E-01 |
| MSMEG_4767 | major facilitator superfamily protein permease                                        | NA   | 1.642 | 4.30E-04 |
| MSMEG_4768 | transcriptional regulator                                                             | NA   | 0.995 | 9.68E-01 |
| MSMEG_4769 | conserved hypothetical protein                                                        | NA   | 1.085 | 6.30E-01 |
| MSMEG_4770 | conserved hypothetical protein                                                        | NA   | 0.958 | 4.55E-02 |
| MSMEG_4771 | conserved hypothetical protein                                                        | NA   | 0.918 | 1.10E-02 |
| MSMEG_4772 | acyl-CoA synthase                                                                     | NA   | 1.017 | 8.81E-01 |
| MSMEG_4773 | amidohydrolase family protein                                                         | NA   | 0.817 | 1.55E-01 |
| MSMEG_4774 | AMP-dependent synthetase and ligase                                                   | NA   | 1.122 | 7.16E-01 |
| MSMEG_4775 | enoyl-CoA hydratase/isomerase family protein                                          | NA   | 1.356 | 2.58E-01 |
| MSMEG_4776 | glyoxalase/bleomycin resistance protein/dioxygenase                                   | NA   | 2.098 | 3.79E-01 |
| MSMEG_4777 | conserved hypothetical protein                                                        | NA   | 1.079 | 1.47E-01 |
| MSMEG_4778 | putative thiolase                                                                     | NA   | 1.634 | 5.27E-01 |
| MSMEG_4779 | probable regulatory protein                                                           | NA   | 1.010 | 8.81E-01 |
| MSMEG_4780 | cytochrome p450                                                                       | NA   | 1.131 | 6.04E-01 |
| MSMEG_4781 | conserved hypothetical protein                                                        | NA   | 0.800 | 3.07E-01 |
| MSMEG_4781 | conserved hypothetical protein                                                        | NA   | 1.034 | 8.08E-01 |
| MSMEG_4782 | conserved hypothetical protein                                                        | NA   | 0.968 | 8.16E-01 |
| MSMEG_4783 | conserved hypothetical protein                                                        | NA   | 0.931 | 6.09E-01 |
| MSMEG_4784 | conserved hypothetical protein                                                        | NA   | 0.940 | 4.77E-01 |
| MSMEG_4785 | mce-family protein mce1f                                                              | NA   | 0.939 | 4.11E-01 |
| MSMEG_4786 | virulence factor mce family protein                                                   | NA   | 1.053 | 6.94E-01 |
| MSMEG_4787 | virulence factor mce family protein                                                   | NA   | 1.056 | 5.89E-01 |
| MSMEG_4788 | virulence factor mce family protein; this region contains one or more premature stops | NA   | 1.110 | 7.58E-03 |
| MSMEG_4789 | hypothetical protein                                                                  | NA   | 1.382 | 4.83E-01 |
| MSMEG_4791 | IS1096, tnpR protein                                                                  | NA   | 0.915 | 2.59E-01 |

|            |                                                             |    |       |          |
|------------|-------------------------------------------------------------|----|-------|----------|
| MSMEG_4791 | IS1096, tnpR protein                                        | NA | 1.304 | 3.27E-01 |
| MSMEG_4792 | virulence factor mce family protein                         | NA | 1.396 | 3.58E-01 |
| MSMEG_4793 | virulence factor Mce family protein                         | NA | 1.135 | 1.29E-01 |
| MSMEG_4794 | virulence factor                                            | NA | 1.177 | 2.19E-01 |
| MSMEG_4795 | ABC-transporter integral membrane protein                   | NA | 0.932 | 4.82E-03 |
| MSMEG_4796 | conserved hypothetical protein                              | NA | 0.923 | 4.48E-01 |
| MSMEG_4797 | hypothetical protein                                        | NA | 1.106 | 1.95E-01 |
| MSMEG_4798 | L-carnitine dehydratase/bile acid-inducible protein F       | NA | 1.016 | 7.32E-01 |
| MSMEG_4799 | aldehyde dehydrogenase (NAD) family protein                 | NA | 1.027 | 7.65E-01 |
| MSMEG_4800 | 3-oxoacyl-(acyl-carrier-protein) reductase, putative        | NA | 0.946 | 5.81E-01 |
| MSMEG_4801 | carveol dehydrogenase                                       | NA | 0.975 | 9.28E-01 |
| MSMEG_4802 | conserved domain protein                                    | NA | 0.860 | 3.13E-01 |
| MSMEG_4803 | cytochrome P450 superfamily protein                         | NA | 1.307 | 3.08E-02 |
| MSMEG_4804 | conserved hypothetical protein                              | NA | 1.111 | 3.94E-01 |
| MSMEG_4805 | acyl-CoA dehydrogenase                                      | NA | 1.513 | 4.45E-01 |
| MSMEG_4806 | putative acyl-CoA dehydrogenase                             | NA | 0.968 | 7.45E-01 |
| MSMEG_4807 | amidohydrolase family protein                               | NA | 7.030 | 3.92E-01 |
| MSMEG_4808 | amidohydrolase family protein                               | NA | 1.063 | 5.29E-01 |
| MSMEG_4809 | Rieske [2Fe-2S] domain, putative                            | NA | 1.184 | 3.45E-01 |
| MSMEG_4810 | conserved hypothetical protein                              | NA | 1.049 | 7.17E-01 |
| MSMEG_4811 | conserved hypothetical protein                              | NA | 1.094 | 4.77E-01 |
| MSMEG_4812 | respiratory-chain NADH dehydrogenase domain, 51 kda subunit | NA | 0.929 | 6.77E-01 |
| MSMEG_4813 | conserved domain protein                                    | NA | 0.953 | 8.11E-01 |
| MSMEG_4814 | conserved hypothetical protein                              | NA | 7.318 | 3.56E-01 |
| MSMEG_4815 | conserved hypothetical protein                              | NA | 1.082 | 2.37E-01 |
| MSMEG_4816 | 6-phosphogluconate dehydrogenase, NAD-binding               | NA | 0.866 | 9.69E-02 |
| MSMEG_4817 | 6-phosphogluconate dehydrogenase, NAD-binding               | NA | 2.615 | 3.92E-01 |
| MSMEG_4818 | putative cytochrome P450 123                                | NA | 1.173 | 5.09E-01 |
| MSMEG_4819 | conserved domain protein                                    | NA | 1.125 | 2.11E-01 |
| MSMEG_4820 | conserved hypothetical protein                              | NA | 1.016 | 8.32E-01 |
| MSMEG_4821 | conserved hypothetical protein                              | NA | 1.160 | 5.29E-01 |

|            |                                                          |    |       |          |
|------------|----------------------------------------------------------|----|-------|----------|
| MSMEG_4822 | conserved domain protein                                 | NA | 1.071 | 8.29E-01 |
| MSMEG_4823 | cytochrome p450                                          | NA | 0.806 | 3.49E-01 |
| MSMEG_4824 | hypothetical protein                                     | NA | 1.034 | 7.42E-01 |
| MSMEG_4825 | transcriptional repressor, TetR family protein, putative | NA | 0.798 | 6.26E-02 |
| MSMEG_4826 | putative acyl-CoA dehydrogenase                          | NA | 0.888 | 5.24E-01 |
| MSMEG_4827 | aminoglycoside phosphotransferase                        | NA | 0.707 | 4.57E-02 |
| MSMEG_4828 | alcohol dehydrogenase, zinc-binding                      | NA | 0.992 | 9.16E-01 |
| MSMEG_4829 | cytochrome P450                                          | NA | 0.869 | 9.20E-03 |
| MSMEG_4830 | conserved hypothetical protein                           | NA | 0.836 | 3.44E-01 |
| MSMEG_4831 | transcriptional regulator, TetR family protein           | NA | 0.749 | 1.98E-01 |
| MSMEG_4832 | acyl-CoA dehydrogenase                                   | NA | 0.895 | 2.64E-02 |
| MSMEG_4833 | putative acyl-CoA dehydrogenase                          | NA | 0.943 | 6.79E-01 |
| MSMEG_4834 | L-carnitine dehydratase/bile acid-inducible protein F    | NA | 0.914 | 1.33E-01 |
| MSMEG_4835 | 3-oxoacyl-[acyl-carrier-protein] reductase               | NA | 1.026 | 9.19E-01 |
| MSMEG_4836 | FadE12_1                                                 | NA | 2.046 | 2.25E-01 |
| MSMEG_4837 | amidohydrolase 2                                         | NA | 1.784 | 3.84E-01 |
| MSMEG_4838 | hypothetical protein                                     | NA | 0.964 | 8.12E-01 |
| MSMEG_4839 | carboxymuconolactone decarboxylase                       | NA | 1.050 | 5.19E-01 |
| MSMEG_4840 | Rieske [2Fe-2S] domain protein                           | NA | 0.898 | 5.12E-01 |
| MSMEG_4841 | conserved hypothetical protein                           | NA | 1.117 | 3.07E-01 |
| MSMEG_4842 | amidohydrolase                                           | NA | 4.794 | 3.89E-01 |
| MSMEG_4843 | conserved hypothetical protein                           | NA | 1.012 | 9.29E-01 |
| MSMEG_4844 | acyl-CoA dehydrogenase                                   | NA | 0.840 | 1.65E-01 |
| MSMEG_4845 | putative acyl-CoA dehydrogenase                          | NA | 1.050 | 5.36E-01 |
| MSMEG_4846 | probable enoyl-CoA hydratase                             | NA | 0.987 | 5.38E-01 |
| MSMEG_4847 | transcriptional regulator, TetR family protein           | NA | 1.164 | 3.00E-02 |
| MSMEG_4848 | hypothetical protein                                     | NA | 1.395 | 4.79E-02 |
| MSMEG_4849 | carveol dehydrogenase                                    | NA | 1.299 | 1.29E-03 |
| MSMEG_4850 | short-chain dehydrogenase/reductase SDR                  | NA | 1.059 | 6.46E-01 |
| MSMEG_4851 | caib/baif family protein                                 | NA | 1.119 | 3.00E-01 |
| MSMEG_4852 | enoyl-CoA hydratase, putative                            | NA | 0.793 | 4.10E-01 |

|            |                                                                    |    |       |          |
|------------|--------------------------------------------------------------------|----|-------|----------|
| MSMEG_4853 | peptidase, M24 family protein                                      | NA | 0.706 | 1.53E-02 |
| MSMEG_4854 | peptidase, M24 family protein                                      | NA | 1.138 | 6.08E-01 |
| MSMEG_4855 | amidohydrolase family protein                                      | NA | 0.998 | 9.95E-01 |
| MSMEG_4856 | cytochrome P450                                                    | NA | 1.045 | 7.94E-01 |
| MSMEG_4857 | conserved domain protein                                           | NA | 0.897 | 7.28E-01 |
| MSMEG_4858 | transcriptional regulator, TetR family protein                     | NA | 0.975 | 8.22E-01 |
| MSMEG_4859 | oxidoreductase, short chain dehydrogenase/reductase family protein | NA | 1.039 | 3.84E-01 |
| MSMEG_4860 | hydrolase, alpha/beta fold family protein, putative                | NA | 0.999 | 9.95E-01 |
| MSMEG_4861 | cyclase                                                            | NA | 1.014 | 8.94E-01 |
| MSMEG_4862 | 3-alpha-hydroxysteroid dehydrogenase                               | NA | 1.281 | 3.14E-01 |
| MSMEG_4863 | conserved hypothetical protein                                     | NA | 0.944 | 7.41E-01 |
| MSMEG_4864 | 3-ketosteroid dehydrogenase                                        | NA | 3.027 | 3.64E-01 |
| MSMEG_4865 | metapyrocatechase 1                                                | NA | 0.960 | 7.14E-01 |
| MSMEG_4866 | 3-(3-hydroxy-phenyl)propionate hydroxylase                         | NA | 1.038 | 7.81E-01 |
| MSMEG_4867 | 2-hydroxy-6-keonona-2,4-dienedoic acid hydrolase                   | NA | 1.023 | 9.11E-01 |
| MSMEG_4868 | transcriptional regulator, lclR family protein, C- domain protein  | NA | 1.072 | 5.40E-01 |
| MSMEG_4869 | LAO/AO transport system ATPase                                     | NA | 0.953 | 6.75E-01 |
| MSMEG_4870 | FAD binding domain, putative                                       | NA | 0.939 | 6.23E-01 |
| MSMEG_4871 | 3-hydroxyacyl-CoA dehydrogenase type-2                             | NA | 1.016 | 7.46E-01 |
| MSMEG_4872 | short chain dehydrogenase                                          | NA | 0.852 | 3.78E-01 |
| MSMEG_4873 | enoyl-CoA hydratase/isomerase                                      | NA | 1.318 | 2.11E-01 |
| MSMEG_4874 | putative acyl-CoA dehydrogenase                                    | NA | 0.905 | 2.42E-01 |
| MSMEG_4875 | putative acyl-CoA dehydrogenase                                    | NA | 1.377 | 2.49E-01 |
| MSMEG_4876 | acyl-CoA synthase                                                  | NA | 0.976 | 8.91E-01 |
| MSMEG_4877 | CaiB/BaiF family protein                                           | NA | 1.411 | 1.63E-01 |
| MSMEG_4878 | 2Fe-2S iron-sulfur cluster binding domain protein                  | NA | 1.752 | 2.02E-01 |
| MSMEG_4879 | conserved hypothetical protein                                     | NA | 1.065 | 7.07E-01 |
| MSMEG_4880 | methylmalonyl-CoA mutase C-terminal domain protein                 | NA | 2.165 | 1.71E-01 |
| MSMEG_4881 | methylmalonyl-CoA mutase, N-terminus of large subunit              | NA | 1.034 | 7.62E-01 |
| MSMEG_4882 | short chain dehydrogenase                                          | NA | 2.105 | 4.09E-01 |
| MSMEG_4883 | AMP-dependent synthetase and ligase                                | NA | 1.099 | 1.41E-01 |

|            |                                                                                        |      |       |          |
|------------|----------------------------------------------------------------------------------------|------|-------|----------|
| MSMEG_4884 | conserved hypothetical protein                                                         | NA   | 1.028 | 7.45E-01 |
| MSMEG_4885 | conserved hypothetical protein                                                         | NA   | 1.039 | 4.40E-01 |
| MSMEG_4886 | major facilitator family protein transporter                                           | NA   | 0.964 | 6.77E-01 |
| MSMEG_4887 | cytochrome P450                                                                        | NA   | 0.882 | 2.02E-01 |
| MSMEG_4888 | periplasmic binding proteins and sugar binding domain of the LacI family protein, puta | NA   | 0.997 | 9.86E-01 |
| MSMEG_4889 | integral membrane transport protein                                                    | NA   | 1.381 | 4.91E-01 |
| MSMEG_4890 | alkylhydroperoxidase, AhpD family protein                                              | ahpD | 0.847 | 1.91E-01 |
| MSMEG_4891 | alkylhydroperoxide reductase                                                           | NA   | 1.000 | 9.93E-01 |
| MSMEG_4892 | conserved hypothetical protein                                                         | NA   | 1.170 | 5.63E-01 |
| MSMEG_4893 | Putative neutral zinc metallopeptidase                                                 | NA   | 1.136 | 2.86E-02 |
| MSMEG_4894 | conserved hypothetical protein                                                         | NA   | 0.925 | 2.78E-02 |
| MSMEG_4895 | hypothetical protein                                                                   | NA   | 1.988 | 3.83E-01 |
| MSMEG_4896 | non-ribosomal peptide synthetase                                                       | NA   | 1.057 | 2.48E-01 |
| MSMEG_4898 | conserved hypothetical protein                                                         | NA   | 1.170 | 1.46E-01 |
| MSMEG_4899 | non-canonical purine NTP pyrophosphatase, RdgB/HAM1 family protein                     | rdgB | 1.237 | 1.11E-01 |
| MSMEG_4900 | Pks14 protein                                                                          | NA   | 1.033 | 4.50E-01 |
| MSMEG_4901 | ribonuclease PH                                                                        | rph  | 1.387 | 4.04E-02 |
| MSMEG_4902 | metal-dependent hydrolase of the beta-lactamase superfamily protein III                | NA   | 1.189 | 9.59E-02 |
| MSMEG_4903 | glutamate racemase                                                                     | murl | 1.043 | 6.63E-01 |
| MSMEG_4904 | rhomboid family protein                                                                | NA   | 0.946 | 3.59E-01 |
| MSMEG_4905 | cysteine synthase B                                                                    | cysM | 0.990 | 8.40E-01 |
| MSMEG_4906 | ThiS family protein                                                                    | NA   | 0.847 | 2.33E-02 |
| MSMEG_4907 | Mov34/MPN/PAD-1 family protein                                                         | NA   | 0.926 | 1.99E-02 |
| MSMEG_4908 | endo-type 6-aminohexanoate oligomer hydrolase                                          | NA   | 0.857 | 2.46E-02 |
| MSMEG_4909 | conserved hypothetical protein                                                         | NA   | 0.932 | 3.94E-01 |
| MSMEG_4910 | ATP-dependent Clp protease adaptor protein ClpS                                        | NA   | 0.982 | 8.87E-01 |
| MSMEG_4911 | putative nicotinate phosphoribosyltransferase                                          | pncB | 0.841 | 9.29E-03 |
| MSMEG_4912 | putative helicase                                                                      | NA   | 1.147 | 5.06E-01 |
| MSMEG_4913 | LpqM protein                                                                           | NA   | 0.966 | 2.83E-01 |
| MSMEG_4914 | virginiamycin B hydrolase                                                              | NA   | 0.988 | 8.91E-01 |
| MSMEG_4915 | alpha-glucan phosphorylase family protein                                              | NA   | 0.949 | 4.05E-01 |

|            |                                                                                  |      |       |          |
|------------|----------------------------------------------------------------------------------|------|-------|----------|
| MSMEG_4916 | alpha-amylase family protein                                                     | NA   | 0.821 | 3.24E-01 |
| MSMEG_4917 | tetratricopeptide repeat domain protein                                          | NA   | 1.200 | 3.37E-02 |
| MSMEG_4918 | 1,4-alpha-glucan branching enzyme                                                | glgB | 0.827 | 1.22E-01 |
| MSMEG_4919 | conserved hypothetical protein                                                   | NA   | 1.180 | 1.25E-02 |
| MSMEG_4920 | acetyl-CoA acetyltransferase                                                     | NA   | 0.974 | 5.43E-01 |
| MSMEG_4921 | methylmalonyl-CoA epimerase                                                      | mce  | 0.883 | 9.15E-02 |
| MSMEG_4922 | conserved hypothetical protein                                                   | NA   | 1.035 | 4.69E-01 |
| MSMEG_4923 | conserved hypothetical protein                                                   | NA   | 1.019 | 8.33E-01 |
| MSMEG_4924 | adenylate cyclase, family protein 3                                              | NA   | 0.991 | 9.17E-01 |
| MSMEG_4925 | transcriptional regulator, Ada family protein/DNA-3-methyladenine glycosylase II | NA   | 1.193 | 4.01E-02 |
| MSMEG_4926 | IS1096, tnpA protein                                                             | NA   | 1.043 | 8.63E-01 |
| MSMEG_4926 | IS1096, tnpA protein                                                             | NA   | 1.263 | 4.75E-01 |
| MSMEG_4927 | IS1096, tnpR protein                                                             | NA   | 0.916 | 5.30E-02 |
| MSMEG_4928 | methylated-DNA--protein-cysteine methyltransferase                               | NA   | 1.021 | 8.70E-01 |
| MSMEG_4932 | UDP-N-acetylglucosamine 1-carboxyvinyltransferase                                | murA | 1.084 | 1.35E-01 |
| MSMEG_4933 | conserved hypothetical protein                                                   | NA   | 0.898 | 5.10E-02 |
| MSMEG_4934 | ATP:cob(I)alamin adenosyltransferase                                             | NA   | 0.962 | 2.84E-01 |
| MSMEG_4935 | ATP synthase F1, epsilon subunit                                                 | atpC | 0.858 | 2.30E-02 |
| MSMEG_4936 | ATP synthase F1, beta subunit                                                    | atpD | 0.875 | 2.15E-01 |
| MSMEG_4937 | ATP synthase F1, gamma subunit                                                   | atpG | 0.793 | 1.60E-02 |
| MSMEG_4938 | ATP synthase F1, alpha subunit                                                   | atpA | 0.756 | 6.08E-03 |
| MSMEG_4939 | ATP synthase delta chain                                                         | NA   | 0.751 | 1.31E-02 |
| MSMEG_4940 | bacteriophage lysis protein                                                      | NA   | 0.948 | 4.16E-02 |
| MSMEG_4941 | ATP synthase FO, C subunit                                                       | atpE | 0.865 | 2.19E-02 |
| MSMEG_4942 | ATP synthase FO, A subunit                                                       | atpB | 0.767 | 3.41E-04 |
| MSMEG_4943 | conserved hypothetical protein                                                   | NA   | 0.897 | 4.98E-03 |
| MSMEG_4944 | hypothetical protein                                                             | NA   | 0.901 | 1.49E-01 |
| MSMEG_4947 | glycosyl transferase                                                             | NA   | 1.014 | 8.35E-01 |
| MSMEG_4948 | Sua5/YciO/YrdC/Ywlc family protein                                               | NA   | 1.167 | 1.04E-02 |
| MSMEG_4949 | modification methylase, HemK family protein                                      | NA   | 0.968 | 7.62E-01 |
| MSMEG_4950 | peptide chain release factor 1                                                   | prfA | 0.923 | 1.97E-01 |

|            |                                                                   |       |       |          |
|------------|-------------------------------------------------------------------|-------|-------|----------|
| MSMEG_4951 | ribosomal protein L31                                             | rpmE  | 1.035 | 8.88E-01 |
| MSMEG_4952 | acyl-CoA synthase                                                 | NA    | 1.197 | 2.46E-01 |
| MSMEG_4953 | putative transcriptional regulator                                | NA    | 1.099 | 2.74E-01 |
| MSMEG_4954 | transcription termination factor Rho                              | rho   | 1.272 | 1.47E-03 |
| MSMEG_4955 | homoserine kinase                                                 | thrB  | 1.132 | 2.96E-01 |
| MSMEG_4956 | threonine synthase                                                | thrC  | 0.983 | 7.15E-01 |
| MSMEG_4957 | homoserine dehydrogenase                                          | NA    | 1.009 | 9.15E-01 |
| MSMEG_4958 | diaminopimelate decarboxylase                                     | lysA  | 1.197 | 2.44E-02 |
| MSMEG_4959 | arginyl-tRNA synthetase                                           | argS  | 1.137 | 2.43E-01 |
| MSMEG_4961 | hypothetical protein                                              | NA    | 3.030 | 7.90E-03 |
| MSMEG_4962 | RemO protein                                                      | NA    | 1.236 | 1.66E-01 |
| MSMEG_4963 | peptide synthetase ScpsB, putative                                | NA    | 1.032 | 8.16E-01 |
| MSMEG_4964 | transcriptional regulator, TetR family protein                    | NA    | 1.377 | 2.03E-01 |
| MSMEG_4965 | hypothetical protein                                              | NA    | 1.117 | 3.67E-01 |
| MSMEG_4966 | CalU12 protein                                                    | NA    | 1.061 | 3.30E-01 |
| MSMEG_4967 | conserved hypothetical protein                                    | NA    | 1.101 | 2.03E-01 |
| MSMEG_4968 | two-component system sensor kinase                                | NA    | 1.773 | 1.27E-02 |
| MSMEG_4969 | two-component system response regulator                           | NA    | 1.400 | 7.19E-02 |
| MSMEG_4970 | hypothetical protein                                              | NA    | 1.300 | 5.19E-02 |
| MSMEG_4971 | oxidoreductase                                                    | NA    | 1.223 | 1.99E-01 |
| MSMEG_4972 | acetyltransferase                                                 | NA    | 1.461 | 4.36E-02 |
| MSMEG_4973 | glyoxalase/bleomycin resistance protein/dioxygenase               | NA    | 0.973 | 5.16E-01 |
| MSMEG_4974 | rff2 family protein (putative transcriptional regulator)          | NA    | 1.112 | 1.13E-01 |
| MSMEG_4975 | flavin-nucleotide-binding protein                                 | NA    | 0.928 | 3.20E-01 |
| MSMEG_4976 | isochorismatase hydrolase                                         | NA    | 0.891 | 1.44E-01 |
| MSMEG_4977 | 3'(2'),5'-bisphosphate nucleotidase, putative                     | NA    | 0.929 | 3.56E-01 |
| MSMEG_4978 | sulfate adenylyltransferase, large subunit/adenylylsulfate kinase | cysNC | 0.412 | 7.54E-05 |
| MSMEG_4979 | sulfate adenylyltransferase, small subunit                        | cysD  | 0.493 | 7.88E-04 |
| MSMEG_4980 | major facilitator superfamily protein MFS_1                       | NA    | 1.556 | 3.32E-01 |
| MSMEG_4981 | phosphotransferase enzyme family protein, putative                | NA    | 0.935 | 5.70E-01 |
| MSMEG_4982 | conserved hypothetical protein                                    | NA    | 1.112 | 3.11E-01 |

|            |                                                                  |      |       |          |
|------------|------------------------------------------------------------------|------|-------|----------|
| MSMEG_4983 | transcriptional regulator, TetR family protein                   | NA   | 1.114 | 4.21E-01 |
| MSMEG_4984 | conserved hypothetical protein, putative                         | NA   | 1.440 | 2.49E-01 |
| MSMEG_4985 | carbonic anhydrase                                               | NA   | 0.808 | 2.17E-02 |
| MSMEG_4986 | glycosyl transferase, family protein 39                          | NA   | 0.985 | 8.78E-01 |
| MSMEG_4987 | glycosyl transferase                                             | NA   | 1.358 | 4.03E-01 |
| MSMEG_4988 | integral membrane protein                                        | NA   | 2.238 | 4.11E-01 |
| MSMEG_4989 | sensor histidine kinase                                          | NA   | 1.111 | 4.09E-01 |
| MSMEG_4990 | DNA-binding response regulator                                   | NA   | 1.081 | 7.09E-01 |
| MSMEG_4991 | hypothetical protein                                             | NA   | 0.809 | 8.20E-02 |
| MSMEG_4992 | hypothetical protein                                             | NA   | 0.976 | 8.97E-01 |
| MSMEG_4993 | hypothetical protein                                             | NA   | 1.057 | 7.82E-01 |
| MSMEG_4994 | flagella membrane glycoprotein 1B, putative                      | NA   | 1.214 | 6.06E-01 |
| MSMEG_4995 | oligopeptide transport system permease protein AppB              | NA   | 1.098 | 4.47E-01 |
| MSMEG_4996 | ABC transporter, permease protein OppC                           | oppC | 0.913 | 2.95E-01 |
| MSMEG_4997 | ABC transporter, ATP-binding protein OppD                        | oppD | 0.809 | 2.34E-01 |
| MSMEG_4998 | hydrolase, alpha/beta fold family protein                        | NA   | 1.250 | 1.55E-01 |
| MSMEG_4999 | bacterial extracellular solute-binding protein, family protein 5 | NA   | 0.990 | 8.39E-01 |
| MSMEG_5000 | transcriptional regulator, LysR family protein                   | NA   | 1.315 | 1.15E-01 |
| MSMEG_5001 | pesticide degrading monooxygenase                                | NA   | 1.012 | 7.14E-01 |
| MSMEG_5002 | conserved hypothetical protein                                   | NA   | 1.116 | 2.77E-01 |
| MSMEG_5003 | O-methyltransferase, family protein 3                            | NA   | 1.093 | 3.37E-01 |
| MSMEG_5004 | DNA repair exonuclease                                           | NA   | 0.980 | 8.49E-01 |
| MSMEG_5005 | LprC protein                                                     | NA   | 0.952 | 2.04E-01 |
| MSMEG_5006 | phosphohistidine phosphatase                                     | NA   | 0.972 | 5.71E-01 |
| MSMEG_5007 | LprB protein                                                     | NA   | 0.975 | 6.93E-01 |
| MSMEG_5008 | ABC transporter, ATP-binding protein                             | NA   | 1.019 | 8.77E-01 |
| MSMEG_5009 | ABC transporter                                                  | NA   | 1.455 | 4.00E-01 |
| MSMEG_5010 | conserved hypothetical protein                                   | NA   | 0.917 | 1.59E-01 |
| MSMEG_5011 | hypothetical protein                                             | NA   | 0.291 | 5.88E-04 |
| MSMEG_5012 | trans-sialidase, putative                                        | NA   | 0.997 | 9.80E-01 |
| MSMEG_5013 | conserved hypothetical protein                                   | NA   | 1.060 | 5.41E-01 |



|            |                                                                                          |    |       |          |
|------------|------------------------------------------------------------------------------------------|----|-------|----------|
| MSMEG_5014 | copper-translocating P-type ATPase                                                       | NA | 1.549 | 4.10E-01 |
| MSMEG_5015 | secreted protein                                                                         | NA | 0.954 | 4.68E-01 |
| MSMEG_5016 | conserved domain protein                                                                 | NA | 0.965 | 5.61E-01 |
| MSMEG_5017 | lipoprotein                                                                              | NA | 0.790 | 1.92E-02 |
| MSMEG_5018 | Adenylate and Guanylate cyclase catalytic domain protein                                 | NA | 1.064 | 7.59E-01 |
| MSMEG_5019 | regulatory protein                                                                       | NA | 0.782 | 1.95E-01 |
| MSMEG_5020 | acetoin(diacetyl) reductase                                                              | NA | 0.789 | 6.74E-02 |
| MSMEG_5021 | alcohol dehydrogenase, zinc-containing                                                   | NA | 1.147 | 5.59E-01 |
| MSMEG_5022 | flavin-containing monooxygenase FMO                                                      | NA | 0.907 | 9.13E-02 |
| MSMEG_5023 | chitooligosaccharide deacetylase                                                         | NA | 1.476 | 2.37E-01 |
| MSMEG_5024 | T/U mismatch-specific DNA glycosylase                                                    | NA | 1.010 | 5.05E-01 |
| MSMEG_5025 | putative transcriptional regulator                                                       | NA | 1.037 | 6.26E-01 |
| MSMEG_5026 | conserved hypothetical protein                                                           | NA | 0.928 | 7.13E-01 |
| MSMEG_5027 | glyoxalase family protein                                                                | NA | 0.959 | 7.02E-01 |
| MSMEG_5028 | HIT family protein                                                                       | NA | 0.868 | 1.24E-02 |
| MSMEG_5029 | alkanal monooxygenase alpha chain                                                        | NA | 1.196 | 1.89E-01 |
| MSMEG_5030 | conserved hypothetical protein TIGR00026                                                 | NA | 1.002 | 9.68E-01 |
| MSMEG_5031 | uracil-DNA glycosylase superfamily protein                                               | NA | 1.934 | 4.49E-01 |
| MSMEG_5032 | putative transcriptional regulator                                                       | NA | 1.139 | 8.01E-02 |
| MSMEG_5033 | Tap protein; this gene contains a frame shift which is not the result of sequencing erro | NA | 0.906 | 4.74E-01 |
| MSMEG_5033 | Tap protein; this gene contains a frame shift which is not the result of sequencing erro | NA | 1.192 | 2.12E-01 |
| MSMEG_5034 | hypothetical protein                                                                     | NA | 0.954 | 4.71E-01 |
| MSMEG_5035 | conserved hypothetical protein                                                           | NA | 0.900 | 3.81E-01 |
| MSMEG_5036 | rhomboid family protein                                                                  | NA | 1.065 | 4.71E-01 |
| MSMEG_5037 | oxidoreductase, FAD-binding                                                              | NA | 1.066 | 4.65E-01 |
| MSMEG_5038 | putative cytochrome P450 123                                                             | NA | 1.080 | 5.21E-01 |
| MSMEG_5039 | Siderophore-interacting protein                                                          | NA | 1.018 | 6.96E-01 |
| MSMEG_5040 | transcriptional regulator, TetR family protein                                           | NA | 1.245 | 3.21E-01 |
| MSMEG_5041 | probable acyltransferase                                                                 | NA | 1.158 | 2.60E-01 |
| MSMEG_5042 | ATP-dependent rna helicase, dead/deah box family protein                                 | NA | 1.050 | 1.26E-01 |
| MSMEG_5043 | LprE protein                                                                             | NA | 0.905 | 2.77E-02 |

|            |                                                                                      |      |       |          |
|------------|--------------------------------------------------------------------------------------|------|-------|----------|
| MSMEG_5044 | ATPase                                                                               | NA   | 0.895 | 3.71E-01 |
| MSMEG_5045 | D-2-hydroxyglutarate dehydrogenase                                                   | NA   | 0.981 | 9.27E-01 |
| MSMEG_5046 | drug transporter                                                                     | NA   | 1.406 | 3.14E-02 |
| MSMEG_5047 | drug resistance transporter Bcr/CflA subfamily protein                               | NA   | 1.801 | 1.11E-02 |
| MSMEG_5048 | conserved hypothetical protein                                                       | NA   | 1.099 | 2.45E-01 |
| MSMEG_5049 | 2-oxoglutarate dehydrogenase, E1 component                                           | sucA | 0.909 | 1.83E-01 |
| MSMEG_5050 | methionine aminopeptidase, type I                                                    | map  | 1.295 | 1.83E-01 |
| MSMEG_5051 | major facilitator superfamily protein                                                | NA   | 1.359 | 1.74E-02 |
| MSMEG_5052 | DNA-binding protein                                                                  | NA   | 1.154 | 2.28E-02 |
| MSMEG_5053 | short chain alcohol dehydrogenase                                                    | NA   | 1.077 | 1.01E-01 |
| MSMEG_5054 | ABC transporter, quaternary amine uptake transporter (QAT) family protein, substrate | NA   | 0.994 | 9.24E-01 |
| MSMEG_5055 | NAD-dependent malic enzyme                                                           | NA   | 0.989 | 8.50E-01 |
| MSMEG_5056 | magnesium and cobalt transport protein CorA                                          | corA | 1.119 | 1.21E-01 |
| MSMEG_5057 | conserved hypothetical protein                                                       | NA   | 0.735 | 1.46E-03 |
| MSMEG_5058 | ABC transporter, ATP-binding protein SugC                                            | NA   | 0.657 | 4.32E-04 |
| MSMEG_5059 | ABC transporter, permease protein SugB                                               | NA   | 0.685 | 8.71E-05 |
| MSMEG_5060 | ABC transporter, permease protein SugA                                               | NA   | 0.731 | 1.24E-04 |
| MSMEG_5061 | Bacterial extracellular solute-binding protein                                       | NA   | 0.766 | 2.96E-04 |
| MSMEG_5062 | conserved hypothetical protein                                                       | NA   | 0.900 | 1.62E-02 |
| MSMEG_5063 | integral membrane protein                                                            | NA   | 1.025 | 8.36E-01 |
| MSMEG_5064 | malyl-CoA lyase                                                                      | NA   | 0.939 | 2.23E-01 |
| MSMEG_5065 | Mg/Co/Ni transporter MgtE                                                            | NA   | 1.140 | 2.21E-01 |
| MSMEG_5066 | integral membrane protein                                                            | NA   | 1.080 | 5.07E-02 |
| MSMEG_5067 | secreted protein                                                                     | NA   | 0.837 | 6.93E-02 |
| MSMEG_5068 | Mrp protein                                                                          | NA   | 1.033 | 1.43E-01 |
| MSMEG_5069 | sec-independent translocase                                                          | NA   | 0.862 | 1.96E-03 |
| MSMEG_5070 | Trypsin                                                                              | NA   | 0.938 | 3.11E-01 |
| MSMEG_5071 | conserved hypothetical protein                                                       | NA   | 0.942 | 3.86E-01 |
| MSMEG_5072 | extracytoplasmic function alternative sigma factor                                   | NA   | 0.911 | 3.11E-01 |
| MSMEG_5073 | O-methyltransferase, family protein 3                                                | NA   | 1.042 | 4.30E-01 |
| MSMEG_5074 | probable transcriptional regulatory protein                                          | NA   | 0.951 | 5.97E-01 |

|            |                                                                                        |      |       |          |
|------------|----------------------------------------------------------------------------------------|------|-------|----------|
| MSMEG_5075 | ABC transporter ATP-binding protein                                                    | NA   | 0.704 | 2.41E-02 |
| MSMEG_5076 | ABC transporter membrane-spanning protein                                              | NA   | 0.803 | 7.52E-02 |
| MSMEG_5077 | probable conserved integral membrane protein                                           | NA   | 0.979 | 9.27E-01 |
| MSMEG_5078 | glucose-1-phosphate adenylyltransferase                                                | glgC | 1.094 | 6.28E-01 |
| MSMEG_5079 | conserved hypothetical protein                                                         | NA   | 1.029 | 7.04E-01 |
| MSMEG_5080 | glycogen synthase                                                                      | NA   | 1.063 | 5.96E-01 |
| MSMEG_5081 | conserved hypothetical protein                                                         | NA   | 0.927 | 5.82E-01 |
| MSMEG_5082 | DNA-3-methyladenine glycosylase I                                                      | tag  | 1.062 | 6.14E-02 |
| MSMEG_5083 | conserved hypothetical protein                                                         | NA   | 1.046 | 3.68E-02 |
| MSMEG_5084 | glycosyl transferase, group 2 family protein                                           | NA   | 1.087 | 3.87E-01 |
| MSMEG_5085 | dihydropteroate synthase                                                               | folP | 1.213 | 1.42E-01 |
| MSMEG_5086 | very-long-chain acyl-CoA synthetase                                                    | NA   | 1.128 | 2.51E-02 |
| MSMEG_5087 | conserved hypothetical protein                                                         | NA   | 1.456 | 2.65E-02 |
| MSMEG_5088 | tetratricopeptide repeat family protein                                                | NA   | 1.684 | 3.35E-01 |
| MSMEG_5089 | conserved hypothetical protein                                                         | NA   | 0.723 | 1.60E-02 |
| MSMEG_5090 | conserved hypothetical protein                                                         | NA   | 0.830 | 1.90E-02 |
| MSMEG_5091 | hypothetical protein                                                                   | NA   | 0.828 | 2.93E-03 |
| MSMEG_5092 | hypothetical protein                                                                   | NA   | 1.167 | 4.60E-01 |
| MSMEG_5095 | This gene is disrupted by an IS1096 element.; ISMsm1, transposase orfB, truncation; ic | NA   | 1.227 | 2.44E-01 |
| MSMEG_5097 | hypothetical protein                                                                   | NA   | 1.186 | 1.70E-01 |
| MSMEG_5098 | hypothetical protein                                                                   | NA   | 2.462 | 3.86E-01 |
| MSMEG_5099 | conserved hypothetical protein                                                         | NA   | 1.115 | 3.75E-01 |
| MSMEG_5100 | pyruvate ferredoxin/flavodoxin oxidoreductase family protein                           | NA   | 1.168 | 7.38E-02 |
| MSMEG_5100 | pyruvate ferredoxin/flavodoxin oxidoreductase family protein                           | NA   | 1.206 | 2.82E-02 |
| MSMEG_5101 | hypothetical protein                                                                   | NA   | 1.237 | 9.13E-02 |
| MSMEG_5102 | ABC transporter ATP-binding protein                                                    | NA   | 1.359 | 3.27E-02 |
| MSMEG_5103 | succinyl-diaminopimelate desuccinylase                                                 | dapE | 1.216 | 8.60E-02 |
| MSMEG_5104 | tetrahydropicolinate succinylase                                                       | NA   | 1.195 | 3.52E-02 |
| MSMEG_5105 | hypothetical protein                                                                   | NA   | 1.171 | 1.76E-01 |
| MSMEG_5106 | HNH endonuclease                                                                       | NA   | 1.019 | 9.00E-01 |
| MSMEG_5107 | secreted protein                                                                       | NA   | 1.096 | 1.28E-01 |

|            |                                                                                      |      |       |          |
|------------|--------------------------------------------------------------------------------------|------|-------|----------|
| MSMEG_5108 | conserved hypothetical protein                                                       | NA   | 1.139 | 4.93E-01 |
| MSMEG_5109 | conserved hypothetical protein                                                       | NA   | 1.031 | 8.16E-01 |
| MSMEG_5110 | sulfatase; this region contains one or more premature stops and/or frameshifts which | NA   | 0.874 | 5.65E-01 |
| MSMEG_5111 | conserved hypothetical protein                                                       | NA   | 1.003 | 8.71E-01 |
| MSMEG_5112 | hypothetical protein                                                                 | NA   | 1.144 | 8.92E-02 |
| MSMEG_5113 | conserved hypothetical protein; this region contains one or more premature stops and | NA   | 0.988 | 6.91E-01 |
| MSMEG_5114 | acyl-CoA synthase                                                                    | NA   | 1.079 | 5.16E-02 |
| MSMEG_5115 | hypothetical protein                                                                 | NA   | 0.743 | 2.27E-01 |
| MSMEG_5116 | conserved hypothetical protein                                                       | NA   | 1.637 | 4.58E-01 |
| MSMEG_5117 | proline dehydrogenase                                                                | NA   | 1.127 | 3.16E-01 |
| MSMEG_5118 | nudix hydrolase                                                                      | NA   | 1.023 | 3.72E-01 |
| MSMEG_5119 | 1-pyrroline-5-carboxylate dehydrogenase                                              | pruA | 1.105 | 5.21E-01 |
| MSMEG_5120 | conserved hypothetical protein                                                       | NA   | 0.946 | 4.13E-01 |
| MSMEG_5121 | aminotransferase, classes I and II                                                   | NA   | 1.080 | 1.51E-01 |
| MSMEG_5122 | ferredoxin                                                                           | NA   | 1.065 | 2.94E-01 |
| MSMEG_5123 | acyl-CoA dehydrogenase, C- domain protein; this gene contains a frame shift which is | NA   | 1.818 | 2.93E-01 |
| MSMEG_5124 | 2,4-dienoyl-coA reductase                                                            | NA   | 1.001 | 9.76E-01 |
| MSMEG_5125 | Ycel like family protein                                                             | NA   | 1.271 | 3.34E-01 |
| MSMEG_5126 | FO synthase                                                                          | NA   | 0.973 | 6.08E-01 |
| MSMEG_5127 | hypothetical protein                                                                 | NA   | 1.405 | 1.90E-02 |
| MSMEG_5128 | conserved hypothetical protein                                                       | NA   | 1.151 | 6.65E-01 |
| MSMEG_5129 | N-Acetyl-1-D-myo-Inositol-2-Amino-2-Deoxy-alpha- D-Glucopyranoside Deacetylase M     | NA   | 0.916 | 2.91E-01 |
| MSMEG_5130 | bacterial extracellular solute-binding protein, family protein 5                     | NA   | 1.190 | 1.02E-02 |
| MSMEG_5131 | hypothetical protein                                                                 | NA   | 0.997 | 9.52E-01 |
| MSMEG_5132 | GTP-binding protein TypA/BipA                                                        | typA | 1.384 | 2.31E-02 |
| MSMEG_5133 | hypothetical protein                                                                 | NA   | 1.155 | 4.09E-01 |
| MSMEG_5134 | hypothetical protein                                                                 | NA   | 1.001 | 9.97E-01 |
| MSMEG_5135 | hypothetical protein                                                                 | NA   | 0.969 | 7.12E-01 |
| MSMEG_5136 | helix-turn-helix motif                                                               | NA   | 1.089 | 7.70E-01 |
| MSMEG_5137 | respiratory nitrate reductase, gamma subunit                                         | narI | 1.065 | 5.48E-01 |
| MSMEG_5138 | nitrate reductase molybdenum cofactor assembly chaperone                             | narJ | 1.637 | 2.33E-01 |

|            |                                                                                            |      |       |          |
|------------|--------------------------------------------------------------------------------------------|------|-------|----------|
| MSMEG_5139 | nitrate reductase, beta subunit                                                            | narH | 1.484 | 3.90E-01 |
| MSMEG_5140 | nitrate reductase, alpha subunit                                                           | NA   | 1.182 | 4.40E-01 |
| MSMEG_5141 | nitrate/nitrite transporter protein                                                        | NA   | 1.277 | 3.39E-01 |
| MSMEG_5142 | beta-glucosidase A                                                                         | NA   | 1.120 | 3.98E-01 |
| MSMEG_5143 | HTH-type transcriptional regulator DegA                                                    | NA   | 1.191 | 3.61E-01 |
| MSMEG_5144 | xylosidase/arabinosidase                                                                   | NA   | 1.010 | 8.59E-01 |
| MSMEG_5145 | extracellular solute-binding protein, family protein 1                                     | NA   | 0.835 | 1.18E-02 |
| MSMEG_5146 | binding protein dependent transport protein                                                | NA   | 0.862 | 3.41E-01 |
| MSMEG_5147 | sugar ABC-transporter integral membrane protein                                            | NA   | 0.998 | 9.88E-01 |
| MSMEG_5148 | CTP pyrophosphohydrolase                                                                   | NA   | 0.883 | 1.63E-01 |
| MSMEG_5149 | conserved transmembrane protein                                                            | NA   | 0.912 | 3.42E-01 |
| MSMEG_5150 | putative pterin-4-alpha-carbinolamine dehydratase                                          | NA   | 0.887 | 1.85E-01 |
| MSMEG_5152 | hypothetical protein                                                                       | NA   | 0.706 | 1.63E-02 |
| MSMEG_5152 | hypothetical protein                                                                       | NA   | 0.802 | 7.18E-02 |
| MSMEG_5153 | conserved hypothetical protein                                                             | NA   | 0.866 | 1.48E-01 |
| MSMEG_5154 | conserved hypothetical protein                                                             | NA   | 0.830 | 5.30E-01 |
| MSMEG_5155 | nitroreductase                                                                             | NA   | 0.855 | 3.00E-01 |
| MSMEG_5156 | base excision DNA repair protein, HhH-GPD family protein                                   | NA   | 0.863 | 6.73E-02 |
| MSMEG_5157 | hypothetical protein                                                                       | NA   | 0.860 | 9.78E-02 |
| MSMEG_5158 | sensor histidine kinase                                                                    | NA   | 1.014 | 8.94E-01 |
| MSMEG_5159 | DNA-binding response regulator, putative                                                   | NA   | 1.088 | 1.91E-01 |
| MSMEG_5160 | putative integral membrane protein                                                         | NA   | 1.058 | 6.40E-01 |
| MSMEG_5161 | transmembrane transport protein                                                            | NA   | 1.103 | 3.68E-01 |
| MSMEG_5162 | cinnamoyl ester hydrolase                                                                  | NA   | 1.086 | 6.09E-01 |
| MSMEG_5163 | ABC proline/glycine betaine family protein transporter, periplasmic ligand binding protein | NA   | 0.997 | 9.63E-01 |
| MSMEG_5164 | zinc-binding alcohol dehydrogenase family protein                                          | NA   | 1.128 | 6.55E-01 |
| MSMEG_5165 | integral membrane protein                                                                  | NA   | 0.856 | 3.10E-01 |
| MSMEG_5166 | Na <sup>+</sup> /solute symporter                                                          | NA   | 1.354 | 3.67E-01 |
| MSMEG_5167 | major facilitator superfamily protein MFS_1                                                | NA   | 0.918 | 7.48E-01 |
| MSMEG_5168 | conserved hypothetical protein                                                             | NA   | 1.039 | 7.90E-01 |
| MSMEG_5169 | conserved hypothetical protein                                                             | NA   | 0.948 | 6.36E-01 |

|            |                                                  |    |       |          |
|------------|--------------------------------------------------|----|-------|----------|
| MSMEG_5170 | pyridoxamine 5'-phosphate oxidase family protein | NA | 0.869 | 8.67E-02 |
| MSMEG_5171 | conserved hypothetical protein                   | NA | 1.059 | 3.15E-01 |
| MSMEG_5172 | conserved hypothetical protein                   | NA | 1.132 | 1.51E-01 |
| MSMEG_5173 | O-methyltransferase, putative                    | NA | 1.023 | 6.76E-01 |
| MSMEG_5174 | regulatory protein GntR, HTH                     | NA | 1.028 | 8.41E-01 |
| MSMEG_5175 | NAD-dependent deacetylase                        | NA | 0.950 | 4.55E-01 |
| MSMEG_5176 | methyltransferase type 11                        | NA | 0.849 | 1.58E-01 |
| MSMEG_5177 | regulatory protein, TetR                         | NA | 0.895 | 4.14E-01 |
| MSMEG_5178 | integral membrane protein                        | NA | 0.792 | 2.97E-01 |
| MSMEG_5179 | DoxX subfamily protein, putative                 | NA | 2.065 | 6.97E-02 |
| MSMEG_5180 | conserved hypothetical protein                   | NA | 0.972 | 8.49E-01 |
| MSMEG_5182 | 2-Nitropropane dioxygenase                       | NA | 0.995 | 9.41E-01 |
| MSMEG_5183 | 3-Hydroxyacyl-CoA dehydrogenase                  | NA | 1.102 | 3.89E-01 |
| MSMEG_5184 | alpha-methylacyl-CoA racemase, putative          | NA | 1.119 | 4.88E-01 |
| MSMEG_5185 | enoyl-CoA hydratase PaaB                         | NA | 1.315 | 3.44E-02 |
| MSMEG_5186 | HicB family protein                              | NA | 1.525 | 3.51E-01 |
| MSMEG_5187 | tetracycline-resistance determinant TetV         | NA | 1.569 | 7.38E-02 |
| MSMEG_5188 | caax amino protease family protein               | NA | 1.272 | 8.00E-03 |
| MSMEG_5189 | oxidoreductase                                   | NA | 1.252 | 3.61E-01 |
| MSMEG_5190 | TetR-family protein transcriptional regulator    | NA | 2.607 | 3.54E-01 |
| MSMEG_5191 | siderophore binding protein                      | NA | 1.065 | 3.63E-01 |
| MSMEG_5192 | aldo/keto reductase                              | NA | 1.568 | 5.72E-02 |
| MSMEG_5193 | transcriptional regulator, AraC family protein   | NA | 1.322 | 1.52E-01 |
| MSMEG_5194 | integral membrane protein                        | NA | 1.102 | 2.47E-01 |
| MSMEG_5195 | hypothetical protein                             | NA | 1.176 | 5.04E-01 |
| MSMEG_5196 | fasciclin domain protein                         | NA | 0.767 | 8.91E-02 |
| MSMEG_5197 | long-chain specific acyl-CoA dehydrogenase       | NA | 0.938 | 2.42E-01 |
| MSMEG_5198 | carnitiny-CoA dehydratase                        | NA | 0.898 | 2.33E-01 |
| MSMEG_5199 | putative acyl-CoA dehydrogenase                  | NA | 0.952 | 3.70E-01 |
| MSMEG_5200 | hypothetical protein                             | NA | 1.309 | 6.03E-01 |
| MSMEG_5201 | regulatory protein GntR, HTH                     | NA | 1.215 | 2.34E-02 |

|            |                                                                    |      |       |          |
|------------|--------------------------------------------------------------------|------|-------|----------|
| MSMEG_5202 | conserved membrane protein                                         | NA   | 1.175 | 4.44E-01 |
| MSMEG_5203 | DoxX subfamily protein, putative                                   | NA   | 0.945 | 1.55E-01 |
| MSMEG_5204 | oxidoreductase, short chain dehydrogenase/reductase family protein | NA   | 2.009 | 1.22E-01 |
| MSMEG_5205 | conserved hypothetical protein                                     | NA   | 1.090 | 6.26E-01 |
| MSMEG_5206 | regulatory protein                                                 | NA   | 1.401 | 4.32E-02 |
| MSMEG_5207 | conserved hypothetical protein                                     | NA   | 1.046 | 7.11E-01 |
| MSMEG_5208 | conserved hypothetical protein                                     | NA   | 1.022 | 4.40E-01 |
| MSMEG_5209 | hydrolase, alpha/beta fold family protein                          | NA   | 0.809 | 3.59E-03 |
| MSMEG_5210 | hydrolase                                                          | NA   | 0.955 | 5.47E-01 |
| MSMEG_5211 | aminotransferase class-III                                         | NA   | 0.986 | 9.18E-01 |
| MSMEG_5212 | conserved hypothetical protein                                     | NA   | 1.083 | 6.45E-01 |
| MSMEG_5213 | conserved hypothetical protein                                     | NA   | 0.900 | 4.31E-01 |
| MSMEG_5214 | RNA polymerase sigma-70 factor                                     | NA   | 2.146 | 3.88E-01 |
| MSMEG_5215 | conserved hypothetical protein                                     | NA   | 0.969 | 7.13E-01 |
| MSMEG_5216 | glyoxalase family protein                                          | NA   | 0.914 | 6.65E-01 |
| MSMEG_5217 | hypothetical protein                                               | NA   | 0.961 | 3.32E-01 |
| MSMEG_5218 | conserved hypothetical protein                                     | NA   | 0.943 | 2.73E-01 |
| MSMEG_5219 | riboflavin biosynthesis protein RibD C- domain protein             | NA   | 0.949 | 4.76E-01 |
| MSMEG_5220 | esterase/lipase/thioesterase                                       | NA   | 1.086 | 5.63E-01 |
| MSMEG_5221 | GCN5-related N-acetyltransferase                                   | NA   | 0.956 | 2.83E-01 |
| MSMEG_5222 | GTP-binding protein YchF                                           | ychF | 0.954 | 5.33E-01 |
| MSMEG_5223 | conserved hypothetical protein                                     | NA   | 1.057 | 4.93E-02 |
| MSMEG_5224 | 4-hydroxy-3-methylbut-2-enyl diphosphate reductase                 | ispH | 1.087 | 2.41E-01 |
| MSMEG_5225 | conserved hypothetical protein                                     | NA   | 0.969 | 4.32E-01 |
| MSMEG_5226 | exodeoxyribonuclease VII, large subunit                            | xseA | 1.122 | 9.27E-02 |
| MSMEG_5227 | exodeoxyribonuclease VII, small subunit                            | xseB | 1.091 | 5.85E-01 |
| MSMEG_5228 | 3-beta hydroxysteroid dehydrogenase/isomerase family protein       | NA   | 0.877 | 5.31E-02 |
| MSMEG_5228 | 3-beta hydroxysteroid dehydrogenase/isomerase family protein       | NA   | 0.974 | 5.46E-01 |
| MSMEG_5229 | hypothetical protein                                               | NA   | 1.143 | 1.47E-01 |
| MSMEG_5230 | conserved hypothetical protein                                     | NA   | 1.228 | 7.80E-02 |
| MSMEG_5231 | hypothetical protein                                               | NA   | 1.113 | 3.89E-01 |

|            |                                                       |      |       |          |
|------------|-------------------------------------------------------|------|-------|----------|
| MSMEG_5232 | hypothetical protein                                  | NA   | 0.915 | 5.39E-01 |
| MSMEG_5233 | RmlD substrate binding domain superfamily protein     | NA   | 0.847 | 1.85E-01 |
| MSMEG_5234 | short-chain dehydrogenase/reductase SDR               | NA   | 0.812 | 9.31E-02 |
| MSMEG_5235 | short chain dehydrogenase family protein              | NA   | 0.917 | 6.09E-01 |
| MSMEG_5236 | dienelactone hydrolase family protein                 | NA   | 1.131 | 1.55E-01 |
| MSMEG_5237 | conserved hypothetical protein                        | NA   | 0.934 | 6.51E-01 |
| MSMEG_5238 | conserved hypothetical protein                        | NA   | 1.127 | 7.50E-03 |
| MSMEG_5239 | fructose-1,6-bisphosphatase, class II                 | glpX | 0.844 | 8.88E-02 |
| MSMEG_5240 | fumarate hydratase class II                           | NA   | 0.968 | 7.26E-01 |
| MSMEG_5241 | GAF family protein                                    | NA   | 1.062 | 3.76E-01 |
| MSMEG_5242 | acyltransferase, ws/dgat/mgat subfamily protein       | NA   | 1.406 | 1.78E-01 |
| MSMEG_5243 | helix-turn-helix motif                                | NA   | 1.677 | 1.12E-01 |
| MSMEG_5244 | two component transcriptional regulatory protein devr | NA   | 1.251 | 8.19E-02 |
| MSMEG_5245 | universal stress protein family protein               | NA   | 1.141 | 4.05E-01 |
| MSMEG_5246 | conserved hypothetical protein                        | NA   | 3.107 | 4.02E-01 |
| MSMEG_5247 | PhoH family protein                                   | NA   | 1.182 | 1.04E-01 |
| MSMEG_5248 | acyl-[ACP] desaturase                                 | NA   | 1.241 | 6.42E-03 |
| MSMEG_5249 | serine hydroxymethyltransferase                       | glyA | 1.068 | 1.92E-01 |
| MSMEG_5250 | CalR9 protein                                         | NA   | 1.042 | 2.99E-01 |
| MSMEG_5251 | hypothetical protein                                  | NA   | 1.010 | 7.98E-01 |
| MSMEG_5252 | pantothenate kinase                                   | coaA | 1.091 | 9.86E-02 |
| MSMEG_5253 | conserved hypothetical protein                        | NA   | 1.059 | 4.36E-01 |
| MSMEG_5254 | conserved hypothetical protein                        | NA   | 1.101 | 5.22E-01 |
| MSMEG_5255 | conserved hypothetical protein                        | NA   | 1.028 | 7.70E-01 |
| MSMEG_5256 | undecaprenyl diphosphate synthase                     | uppS | 1.028 | 7.22E-01 |
| MSMEG_5257 | channel protein, hemolysin III family protein         | NA   | 1.342 | 6.80E-03 |
| MSMEG_5258 | steroid delta-isomerase                               | NA   | 1.016 | 8.90E-01 |
| MSMEG_5259 | conserved hypothetical protein                        | NA   | 1.043 | 8.01E-01 |
| MSMEG_5260 | conserved hypothetical protein                        | NA   | 0.981 | 4.26E-01 |
| MSMEG_5261 | mycothiol conjugate amidase Mca                       | NA   | 0.950 | 2.71E-02 |
| MSMEG_5262 | conserved hypothetical protein                        | NA   | 1.073 | 6.50E-01 |



|            |                                                          |      |       |          |
|------------|----------------------------------------------------------|------|-------|----------|
| MSMEG_5263 | transcription elongation factor GreA                     | NA   | 1.280 | 1.23E-02 |
| MSMEG_5264 | conserved hypothetical protein                           | NA   | 1.212 | 8.99E-02 |
| MSMEG_5264 | conserved hypothetical protein                           | NA   | 1.537 | 5.69E-02 |
| MSMEG_5265 | putative cystathionine gamma-synthase                    | NA   | 1.143 | 7.75E-02 |
| MSMEG_5266 | RDD family protein                                       | NA   | 1.094 | 3.31E-02 |
| MSMEG_5267 | glutaryl-CoA dehydrogenase                               | NA   | 0.968 | 5.67E-01 |
| MSMEG_5268 | conserved hypothetical protein                           | NA   | 0.758 | 3.35E-03 |
| MSMEG_5269 | hypothetical protein                                     | NA   | 0.966 | 5.11E-01 |
| MSMEG_5270 | cystathionine beta-synthase                              | NA   | 1.268 | 5.29E-02 |
| MSMEG_5271 | esterase                                                 | NA   | 0.891 | 3.49E-01 |
| MSMEG_5272 | conserved exported protein                               | NA   | 1.120 | 2.28E-01 |
| MSMEG_5273 | beta-ketoadipyl CoA thiolase                             | NA   | 0.935 | 2.33E-01 |
| MSMEG_5274 | phosphoribosylglycinamide formyltransferase 2            | purT | 1.126 | 1.41E-02 |
| MSMEG_5275 | permease of the major facilitator superfamily protein    | NA   | 0.966 | 6.60E-01 |
| MSMEG_5276 | enoyl-CoA hydratase                                      | NA   | 0.880 | 3.09E-02 |
| MSMEG_5277 | probable enoyl-CoA hydratase                             | NA   | 1.100 | 2.38E-02 |
| MSMEG_5278 | conserved membrane-spanning protein                      | NA   | 1.109 | 5.08E-01 |
| MSMEG_5279 | conserved hypothetical protein                           | NA   | 1.290 | 1.18E-01 |
| MSMEG_5280 | cysteine dioxygenase type I superfamily protein          | NA   | 1.091 | 4.80E-01 |
| MSMEG_5281 | LpqV protein                                             | NA   | 1.027 | 4.04E-01 |
| MSMEG_5282 | transcriptional regulator                                | NA   | 2.771 | 3.61E-01 |
| MSMEG_5283 | hydrolase, CocE/NonD family protein                      | NA   | 1.498 | 2.07E-02 |
| MSMEG_5284 | patatin                                                  | NA   | 1.602 | 2.06E-03 |
| MSMEG_5285 | phospholipase, patatin family protein                    | NA   | 1.068 | 1.65E-01 |
| MSMEG_5286 | dihydrodipicolinate reductase, N-terminus domain protein | dapB | 0.790 | 6.15E-02 |
| MSMEG_5287 | dehydrogenase                                            | NA   | 1.087 | 6.51E-01 |
| MSMEG_5288 | putative serine/threonine protein kinase                 | NA   | 1.401 | 1.92E-01 |
| MSMEG_5289 | hypothetical protein                                     | NA   | 0.944 | 4.79E-01 |
| MSMEG_5290 | hypothetical protein                                     | NA   | 1.097 | 3.12E-01 |
| MSMEG_5291 | acyl-CoA synthase                                        | NA   | 1.169 | 3.17E-01 |
| MSMEG_5292 | hypothetical protein                                     | NA   | 1.291 | 4.67E-02 |

|            |                                                               |      |       |          |
|------------|---------------------------------------------------------------|------|-------|----------|
| MSMEG_5293 | hypothetical protein                                          | NA   | 1.310 | 5.33E-03 |
| MSMEG_5294 | hypothetical protein                                          | NA   | 1.377 | 3.59E-02 |
| MSMEG_5295 | peroxisomal-coenzyme A synthetase                             | NA   | 1.077 | 5.58E-01 |
| MSMEG_5296 | hypothetical protein                                          | NA   | 1.546 | 5.32E-01 |
| MSMEG_5297 | oxalyl-CoA decarboxylase                                      | NA   | 0.932 | 3.74E-01 |
| MSMEG_5298 | hypothetical protein                                          | NA   | 1.414 | 4.85E-02 |
| MSMEG_5299 | hypothetical protein                                          | NA   | 1.777 | 3.37E-01 |
| MSMEG_5300 | short-chain type dehydrogenase/reductase                      | NA   | 1.114 | 6.19E-02 |
| MSMEG_5301 | transcriptional regulator                                     | NA   | 1.545 | 1.37E-01 |
| MSMEG_5302 | aerobic C4-dicarboxylate transport protein                    | NA   | 0.578 | 2.61E-02 |
| MSMEG_5303 | sodium/proline symporter                                      | putP | 0.927 | 4.53E-01 |
| MSMEG_5304 | two-component sensor kinase                                   | NA   | 0.901 | 2.37E-01 |
| MSMEG_5305 | choline dehydrogenase                                         | NA   | 0.983 | 9.11E-01 |
| MSMEG_5306 | two-component system response regulator                       | NA   | 1.031 | 8.47E-01 |
| MSMEG_5307 | TetR-family protein transcriptional regulator                 | NA   | 1.038 | 8.91E-01 |
| MSMEG_5308 | conserved hypothetical protein                                | NA   | 1.164 | 3.51E-01 |
| MSMEG_5309 | conserved hypothetical protein                                | NA   | 1.637 | 1.25E-01 |
| MSMEG_5310 | SAM-dependent methyltransferase                               | NA   | 1.325 | 4.37E-01 |
| MSMEG_5311 | conserved hypothetical protein                                | NA   | 0.841 | 2.07E-01 |
| MSMEG_5312 | ABC-type multidrug transport system ATPase component          | NA   | 1.195 | 4.91E-02 |
| MSMEG_5313 | hypothetical protein                                          | NA   | 1.014 | 9.34E-01 |
| MSMEG_5314 | conserved hypothetical protein                                | NA   | 1.837 | 4.38E-01 |
| MSMEG_5315 | gp35 protein                                                  | NA   | 1.000 | 9.99E-01 |
| MSMEG_5316 | glutamine ABC transporter, ATP-binding protein                | NA   | 0.883 | 1.12E-01 |
| MSMEG_5317 | conserved hypothetical protein                                | NA   | 0.996 | 9.83E-01 |
| MSMEG_5318 | glutamine ABC transporter, permease/substrate-binding protein | NA   | 0.822 | 4.15E-02 |
| MSMEG_5319 | alkylhydroperoxidase AhpD core                                | NA   | 1.453 | 6.63E-02 |
| MSMEG_5320 | hypothetical protein                                          | NA   | 0.942 | 5.15E-01 |
| MSMEG_5321 | hypothetical protein                                          | NA   | 0.846 | 6.32E-02 |
| MSMEG_5322 | hypothetical protein                                          | NA   | 1.096 | 3.90E-01 |
| MSMEG_5323 | conserved hypothetical protein                                | NA   | 0.958 | 5.66E-01 |

|            |                                                                                         |    |       |          |
|------------|-----------------------------------------------------------------------------------------|----|-------|----------|
| MSMEG_5324 | conserved hypothetical protein                                                          | NA | 1.074 | 7.73E-01 |
| MSMEG_5325 | hypothetical protein                                                                    | NA | 1.041 | 6.94E-01 |
| MSMEG_5326 | hypothetical protein                                                                    | NA | 1.098 | 3.78E-01 |
| MSMEG_5327 | hypothetical protein                                                                    | NA | 0.955 | 7.81E-01 |
| MSMEG_5328 | conserved hypothetical protein                                                          | NA | 1.354 | 1.84E-01 |
| MSMEG_5329 | conserved hypothetical protein                                                          | NA | 1.530 | 1.29E-02 |
| MSMEG_5330 | SIS domain protein                                                                      | NA | 1.081 | 2.23E-01 |
| MSMEG_5331 | UDP-glucuronosyl and UDP-glucosyl transferase family; this gene contains a frame shif   | NA | 1.025 | 7.47E-01 |
| MSMEG_5331 | UDP-glucuronosyl and UDP-glucosyl transferase family; this gene contains a frame shif   | NA | 1.183 | 3.28E-02 |
| MSMEG_5332 | transcriptional regulator, TetR family protein                                          | NA | 1.193 | 4.50E-01 |
| MSMEG_5333 | hypothetical protein                                                                    | NA | 0.808 | 8.95E-03 |
| MSMEG_5334 | conserved hypothetical protein                                                          | NA | 1.163 | 3.06E-01 |
| MSMEG_5335 | formamidase                                                                             | NA | 1.269 | 2.95E-01 |
| MSMEG_5336 | amidate substrates transporter protein                                                  | NA | 0.980 | 8.10E-01 |
| MSMEG_5337 | putative regulatory protein, FmdB family; this gene contains a frame shift which is not | NA | 0.903 | 5.36E-01 |
| MSMEG_5338 | regulatory protein, MarR                                                                | NA | 1.021 | 5.35E-02 |
| MSMEG_5339 | nitrile hydratase regulator1                                                            | NA | 1.388 | 2.13E-01 |
| MSMEG_5340 | TetR-family protein transcriptional regulator                                           | NA | 1.289 | 1.04E-02 |
| MSMEG_5341 | dipeptidyl aminopeptidase/acylaminoacyl peptidase                                       | NA | 0.848 | 3.94E-01 |
| MSMEG_5342 | conserved hypothetical protein                                                          | NA | 0.923 | 5.63E-01 |
| MSMEG_5343 | conserved hypothetical protein                                                          | NA | 0.954 | 8.13E-01 |
| MSMEG_5344 | hypothetical protein                                                                    | NA | 1.012 | 9.55E-01 |
| MSMEG_5345 | glycosyl hydrolases family protein 16                                                   | NA | 0.980 | 8.78E-01 |
| MSMEG_5346 | TetR-family protein transcriptional regulator                                           | NA | 1.232 | 5.52E-01 |
| MSMEG_5347 | transporter, major facilitator family protein                                           | NA | 0.861 | 7.03E-01 |
| MSMEG_5348 | medium-chain fatty acid-CoA ligase                                                      | NA | 0.822 | 3.63E-01 |
| MSMEG_5349 | conserved hypothetical protein, putative                                                | NA | 0.932 | 5.08E-01 |
| MSMEG_5350 | PPE family protein, putative                                                            | NA | 1.065 | 1.52E-01 |
| MSMEG_5351 | hypothetical protein                                                                    | NA | 1.215 | 2.29E-01 |
| MSMEG_5352 | conserved hypothetical protein                                                          | NA | 0.888 | 3.67E-01 |
| MSMEG_5353 | putative methyltransferase                                                              | NA | 1.122 | 5.42E-01 |

|            |                                                                                             |      |       |          |
|------------|---------------------------------------------------------------------------------------------|------|-------|----------|
| MSMEG_5354 | O-methyltransferase, family protein 2                                                       | NA   | 1.241 | 3.58E-02 |
| MSMEG_5355 | hypothetical protein                                                                        | NA   | 0.944 | 3.70E-01 |
| MSMEG_5356 | hypothetical protein                                                                        | NA   | 1.409 | 4.64E-02 |
| MSMEG_5357 | conserved hypothetical protein                                                              | NA   | 0.952 | 4.29E-01 |
| MSMEG_5358 | acetamidase/Formamidase family protein                                                      | NA   | 0.950 | 6.50E-01 |
| MSMEG_5359 | cyanate hydratase                                                                           | cynS | 1.083 | 1.81E-01 |
| MSMEG_5360 | formate/nitrate transporter                                                                 | NA   | 1.088 | 7.22E-01 |
| MSMEG_5361 | hypothetical protein                                                                        | NA   | 1.007 | 9.76E-01 |
| MSMEG_5362 | hypothetical protein                                                                        | NA   | 1.141 | 2.25E-01 |
| MSMEG_5363 | hypothetical protein                                                                        | NA   | 1.274 | 1.64E-01 |
| MSMEG_5364 | amidohydrolase 2                                                                            | NA   | 1.113 | 5.74E-02 |
| MSMEG_5365 | RNA polymerase sigma-70 factor                                                              | NA   | 1.055 | 2.87E-01 |
| MSMEG_5366 | conserved hypothetical protein                                                              | NA   | 0.764 | 1.72E-01 |
| MSMEG_5367 | conserved hypothetical protein; this gene contains a frame shift which is not the result of | NA   | 0.990 | 3.25E-01 |
| MSMEG_5368 | ectoine/hydroxyectoine ABC transporter solute-binding protein                               | ehuB | 0.725 | 9.59E-03 |
| MSMEG_5369 | ectoine/hydroxyectoine ABC transporter, permease protein EhuC                               | ehuC | 0.699 | 1.01E-02 |
| MSMEG_5370 | ectoine/hydroxyectoine ABC transporter, permease protein EhuD                               | ehuD | 0.642 | 1.66E-04 |
| MSMEG_5371 | ectoine/hydroxyectoine ABC transporter, ATP-binding protein                                 | ehuA | 0.639 | 6.28E-04 |
| MSMEG_5372 | sensor protein KdpD                                                                         | NA   | 1.045 | 8.70E-01 |
| MSMEG_5373 | nitrilase 2                                                                                 | NA   | 1.281 | 3.57E-01 |
| MSMEG_5374 | glutamate--ammonia ligase                                                                   | NA   | 1.217 | 5.97E-01 |
| MSMEG_5375 | GntR-family protein transcriptional regulator                                               | NA   | 1.197 | 1.13E-01 |
| MSMEG_5376 | conserved hypothetical protein                                                              | NA   | 1.163 | 4.47E-01 |
| MSMEG_5377 | hypothetical protein                                                                        | NA   | 1.517 | 5.19E-01 |
| MSMEG_5381 | hypothetical protein                                                                        | NA   | 1.026 | 7.27E-01 |
| MSMEG_5382 | hypothetical protein; this gene contains a frame shift which is not the result of sequen    | NA   | 1.014 | 9.35E-01 |
| MSMEG_5383 | dehydrogenase/reductase SDR family protein member 4                                         | NA   | 1.574 | 8.78E-02 |
| MSMEG_5384 | hypothetical protein                                                                        | NA   | 1.659 | 2.89E-01 |
| MSMEG_5385 | metallo-beta-lactamase family protein                                                       | NA   | 2.325 | 1.12E-01 |
| MSMEG_5386 | rhodanese-like domain protein                                                               | NA   | 1.284 | 3.05E-01 |
| MSMEG_5387 | conserved hypothetical protein                                                              | NA   | 1.222 | 4.94E-01 |

|            |                                                                                           |      |       |          |
|------------|-------------------------------------------------------------------------------------------|------|-------|----------|
| MSMEG_5388 | conserved hypothetical protein                                                            | NA   | 0.910 | 4.76E-01 |
| MSMEG_5389 | LysA protein                                                                              | NA   | 1.270 | 2.65E-01 |
| MSMEG_5390 | conserved hypothetical protein                                                            | NA   | 0.989 | 9.11E-01 |
| MSMEG_5391 | hypothetical protein                                                                      | NA   | 0.982 | 8.56E-01 |
| MSMEG_5392 | K <sup>+</sup> -transporting ATPase, A subunit                                            | kdpA | 0.910 | 4.72E-01 |
| MSMEG_5393 | K <sup>+</sup> -transporting ATPase, B subunit                                            | kdpB | 1.193 | 2.54E-01 |
| MSMEG_5394 | potassium-transporting ATPase C chain                                                     | NA   | 1.126 | 1.97E-01 |
| MSMEG_5395 | sensor protein KdpD                                                                       | NA   | 0.899 | 1.36E-01 |
| MSMEG_5396 | KDP operon transcriptional regulatory protein KdpE                                        | NA   | 1.223 | 1.57E-02 |
| MSMEG_5397 | ATP-dependent DNA helicase RecQ                                                           | recQ | 1.195 | 1.98E-01 |
| MSMEG_5399 | ATP-dependent DNA helicase RecQ                                                           | NA   | 1.212 | 2.29E-01 |
| MSMEG_5400 | dehydrogenase                                                                             | NA   | 1.176 | 3.16E-01 |
| MSMEG_5401 | conserved hypothetical protein                                                            | NA   | 1.057 | 2.37E-01 |
| MSMEG_5402 | dehydrogenase DhgA                                                                        | NA   | 1.417 | 3.24E-01 |
| MSMEG_5403 | cadmium-translocating P-type ATPase                                                       | cadA | 0.916 | 2.21E-01 |
| MSMEG_5404 | propionate--CoA ligase                                                                    | NA   | 0.870 | 2.65E-01 |
| MSMEG_5405 | transcriptional regulator, ArsR family protein                                            | NA   | 1.252 | 2.93E-02 |
| MSMEG_5406 | hypothetical protein                                                                      | NA   | 1.311 | 6.34E-01 |
| MSMEG_5407 | integral membrane protein                                                                 | NA   | 1.065 | 4.43E-01 |
| MSMEG_5408 | prolipoprotein diacylglyceryl transferase                                                 | lgt  | 0.831 | 3.77E-02 |
| MSMEG_5409 | conserved hypothetical protein                                                            | NA   | 1.287 | 5.12E-01 |
| MSMEG_5410 | radical SAM domain protein                                                                | NA   | 1.084 | 2.49E-01 |
| MSMEG_5411 | conserved hypothetical protein                                                            | NA   | 1.075 | 6.52E-01 |
| MSMEG_5412 | immunogenic protein MPT63                                                                 | NA   | 0.893 | 1.70E-01 |
| MSMEG_5413 | exopolyphosphatase                                                                        | NA   | 1.171 | 1.41E-01 |
| MSMEG_5414 | septum formation initiator subfamily protein, putative                                    | NA   | 0.900 | 2.69E-01 |
| MSMEG_5415 | enolase                                                                                   | eno  | 0.867 | 2.75E-02 |
| MSMEG_5416 | LpqU protein                                                                              | NA   | 0.979 | 7.41E-01 |
| MSMEG_5417 | hypothetical protein                                                                      | NA   | 0.964 | 7.53E-01 |
| MSMEG_5418 | iron permease FTR1                                                                        | NA   | 0.943 | 5.44E-01 |
| MSMEG_5419 | lipoprotein; this gene contains a frame shift which is not the result of sequencing error | NA   | 0.764 | 5.35E-02 |

|            |                                                          |      |       |          |
|------------|----------------------------------------------------------|------|-------|----------|
| MSMEG_5420 | Tat-translocated enzyme                                  | NA   | 0.613 | 4.22E-03 |
| MSMEG_5421 | hypothetical protein                                     | NA   | 0.585 | 1.10E-02 |
| MSMEG_5422 | transcriptional regulator, MazG family protein           | NA   | 1.344 | 6.96E-03 |
| MSMEG_5423 | transcription-repair coupling factor                     | mfd  | 1.387 | 3.34E-04 |
| MSMEG_5424 | transcriptional regulator, TetR family protein           | NA   | 1.187 | 8.69E-02 |
| MSMEG_5426 | UDP-N-acetylglucosamine pyrophosphorylase                | glmU | 1.052 | 3.94E-01 |
| MSMEG_5427 | ribose-phosphate pyrophosphokinase                       | NA   | 1.104 | 2.99E-02 |
| MSMEG_5428 | arsenate reductase                                       | arsC | 1.088 | 1.53E-02 |
| MSMEG_5429 | LpqT protein                                             | NA   | 0.919 | 3.53E-02 |
| MSMEG_5429 | LpqT protein                                             | NA   | 0.993 | 7.56E-01 |
| MSMEG_5430 | retinol dehydrogenase 13                                 | NA   | 1.087 | 3.52E-02 |
| MSMEG_5431 | ribosomal protein L25, Ctc-form                          | NA   | 1.153 | 2.98E-02 |
| MSMEG_5432 | peptidyl-tRNA hydrolase                                  | pth  | 1.218 | 4.05E-02 |
| MSMEG_5433 | 4Fe-4S binding domain protein                            | NA   | 3.125 | 3.55E-01 |
| MSMEG_5434 | hypothetical protein                                     | NA   | 0.887 | 5.25E-01 |
| MSMEG_5435 | acyl-CoA synthase                                        | NA   | 0.954 | 7.22E-01 |
| MSMEG_5436 | 4-diphosphocytidyl-2C-methyl-D-erythritol kinase         | ispE | 1.139 | 3.19E-01 |
| MSMEG_5437 | probable serine/threonine-protein kinase PknB            | NA   | 0.781 | 2.57E-01 |
| MSMEG_5438 | dimethyladenosine transferase                            | ksgA | 1.145 | 4.92E-02 |
| MSMEG_5439 | resuscitation-promoting factor RpfB                      | NA   | 1.070 | 4.54E-01 |
| MSMEG_5440 | deoxyribonuclease                                        | NA   | 1.023 | 5.49E-01 |
| MSMEG_5441 | methionyl-tRNA synthetase                                | metG | 0.968 | 6.45E-01 |
| MSMEG_5442 | glutamate dehydrogenase                                  | NA   | 1.040 | 6.83E-01 |
| MSMEG_5443 | dehydrogenase                                            | NA   | 1.018 | 8.41E-01 |
| MSMEG_5444 | RNA polymerase sigma-70 factor, TIGR02957 family protein | NA   | 1.049 | 7.18E-01 |
| MSMEG_5445 | conserved hypothetical protein                           | NA   | 1.048 | 5.15E-01 |
| MSMEG_5446 | para-aminobenzoate synthase, component I                 | pabB | 1.213 | 4.10E-01 |
| MSMEG_5447 | dolichyl-phosphate-mannose-protein mannosyltransferase   | NA   | 1.235 | 3.90E-02 |
| MSMEG_5448 | arginine deiminase                                       | arcA | 1.001 | 9.87E-01 |
| MSMEG_5449 | conserved hypothetical protein                           | NA   | 1.281 | 4.95E-01 |
| MSMEG_5450 | redox-sensitive transcriptional activator SoxR           | soxR | 1.254 | 3.30E-02 |

|            |                                                    |      |       |          |
|------------|----------------------------------------------------|------|-------|----------|
| MSMEG_5451 | alkylated DNA repair protein                       | NA   | 1.311 | 5.13E-02 |
| MSMEG_5452 | conserved hypothetical protein                     | NA   | 1.016 | 8.83E-01 |
| MSMEG_5453 | conserved hypothetical protein                     | NA   | 1.196 | 5.75E-01 |
| MSMEG_5454 | choloylglycine hydrolase, putative                 | NA   | 1.054 | 6.47E-01 |
| MSMEG_5455 | pe family protein                                  | NA   | 1.062 | 1.95E-01 |
| MSMEG_5456 | MK35 lipoprotein                                   | NA   | 0.654 | 4.33E-02 |
| MSMEG_5457 | shikimate 5-dehydrogenase                          | NA   | 0.846 | 3.17E-01 |
| MSMEG_5458 | cyclic nucleotide-binding protein                  | NA   | 0.974 | 8.92E-01 |
| MSMEG_5459 | hypothetical protein                               | NA   | 1.071 | 6.66E-01 |
| MSMEG_5460 | conserved hypothetical protein                     | NA   | 1.213 | 2.41E-01 |
| MSMEG_5461 | hypothetical protein                               | NA   | 1.117 | 4.64E-01 |
| MSMEG_5462 | RarD protein                                       | rarD | 1.021 | 7.96E-01 |
| MSMEG_5463 | 6-phosphogluconate dehydrogenase, NAD-binding      | NA   | 1.048 | 3.72E-01 |
| MSMEG_5464 | integral membrane transport protein                | NA   | 1.422 | 3.40E-01 |
| MSMEG_5465 | transcriptional regulator, AraC family protein     | NA   | 1.013 | 9.09E-01 |
| MSMEG_5466 | oxidoreductase                                     | NA   | 1.051 | 4.80E-01 |
| MSMEG_5468 | conserved hypothetical protein                     | NA   | 0.854 | 7.29E-02 |
| MSMEG_5469 | acetyltransferase, GNAT family protein             | NA   | 1.091 | 2.89E-02 |
| MSMEG_5470 | molybdopterin biosynthesis protein MoeA 1          | NA   | 1.025 | 7.52E-01 |
| MSMEG_5471 | UTP-glucose-1-phosphate uridylyltransferase        | galU | 0.924 | 5.55E-02 |
| MSMEG_5472 | 5,10-methenyltetrahydrofolate synthetase           | NA   | 0.866 | 3.14E-01 |
| MSMEG_5473 | transporter                                        | NA   | 0.724 | 2.24E-01 |
| MSMEG_5474 | universal stress protein family protein            | NA   | 1.067 | 3.25E-01 |
| MSMEG_5475 | acetate operon repressor                           | NA   | 1.082 | 4.98E-01 |
| MSMEG_5476 | glyoxylate carboligase                             | gcl  | 1.051 | 4.28E-01 |
| MSMEG_5477 | 2-hydroxy-3-oxopropionate reductase                | NA   | 1.180 | 2.37E-01 |
| MSMEG_5478 | hydroxypyruvate isomerase, putative                | NA   | 0.995 | 9.58E-01 |
| MSMEG_5479 | type I antifreeze protein                          | NA   | 1.033 | 6.68E-01 |
| MSMEG_5480 | hypothetical protein                               | NA   | 1.123 | 1.14E-01 |
| MSMEG_5481 | conserved hypothetical protein                     | NA   | 1.637 | 3.83E-01 |
| MSMEG_5482 | large conductance mechanosensitive channel protein | mscL | 0.988 | 8.92E-01 |

|            |                                                                                          |      |       |          |
|------------|------------------------------------------------------------------------------------------|------|-------|----------|
| MSMEG_5483 | porin                                                                                    | NA   | 0.779 | 4.24E-03 |
| MSMEG_5484 | conserved hypothetical protein                                                           | NA   | 1.196 | 3.06E-01 |
| MSMEG_5485 | molybdopterin biosynthesis protein                                                       | NA   | 0.974 | 1.20E-01 |
| MSMEG_5486 | peptidase S1 and S6, chymotrypsin/Hap                                                    | NA   | 0.871 | 5.41E-03 |
| MSMEG_5487 | sensor histidine kinase                                                                  | NA   | 0.970 | 5.33E-01 |
| MSMEG_5488 | DNA-binding response regulator                                                           | NA   | 0.998 | 9.49E-01 |
| MSMEG_5489 | ribosomal protein L32                                                                    | rpmF | 1.622 | 3.87E-01 |
| MSMEG_5490 | conserved hypothetical protein                                                           | NA   | 0.875 | 4.10E-01 |
| MSMEG_5491 | putative acyl-CoA dehydrogenase                                                          | NA   | 0.773 | 5.88E-02 |
| MSMEG_5492 | acetyl-CoA carboxylase carboxyltransferase                                               | NA   | 0.693 | 4.81E-02 |
| MSMEG_5493 | acetyl-/propionyl-coenzyme A carboxylase alpha chain                                     | NA   | 0.829 | 3.42E-01 |
| MSMEG_5494 | acyl-CoA dehydrogenase fadE12                                                            | NA   | 1.107 | 7.88E-01 |
| MSMEG_5495 | enoyl-CoA hydratase                                                                      | NA   | 1.125 | 6.03E-01 |
| MSMEG_5496 | MscS Mechanosensitive ion channel                                                        | NA   | 0.830 | 2.86E-01 |
| MSMEG_5497 | conserved hypothetical protein                                                           | NA   | 1.563 | 4.52E-01 |
| MSMEG_5498 | conserved hypothetical protein                                                           | NA   | 1.058 | 3.92E-01 |
| MSMEG_5499 | conserved hypothetical protein                                                           | NA   | 1.711 | 3.98E-01 |
| MSMEG_5500 | hypothetical protein                                                                     | NA   | 0.892 | 3.14E-01 |
| MSMEG_5501 | hypothetical protein                                                                     | NA   | 0.937 | 6.00E-01 |
| MSMEG_5502 | hypothetical protein                                                                     | NA   | 0.687 | 4.22E-03 |
| MSMEG_5503 | hypothetical protein                                                                     | NA   | 1.159 | 5.32E-01 |
| MSMEG_5504 | conserved secreted protein                                                               | NA   | 1.149 | 6.90E-01 |
| MSMEG_5505 | conserved hypothetical protein                                                           | NA   | 1.142 | 5.64E-02 |
| MSMEG_5506 | hypothetical protein                                                                     | NA   | 1.848 | 1.39E-01 |
| MSMEG_5507 | hypothetical protein                                                                     | NA   | 2.336 | 1.10E-02 |
| MSMEG_5508 | alkaline phosphatase                                                                     | NA   | 0.960 | 7.52E-01 |
| MSMEG_5509 | conserved hypothetical protein                                                           | NA   | 0.912 | 4.65E-01 |
| MSMEG_5510 | conserved hypothetical protein; this gene contains a frame shift which is not the result | NA   | 0.838 | 3.88E-01 |
| MSMEG_5511 | von Willebrand factor, type A                                                            | NA   | 0.841 | 8.45E-02 |
| MSMEG_5512 | magnesium chelatase                                                                      | NA   | 0.935 | 4.10E-01 |
| MSMEG_5513 | serine/threonine-protein kinase PknE                                                     | NA   | 1.220 | 2.52E-02 |



|            |                                                                    |      |       |          |
|------------|--------------------------------------------------------------------|------|-------|----------|
| MSMEG_5514 | hypothetical protein                                               | NA   | 0.971 | 6.97E-01 |
| MSMEG_5515 | bifunctional purine biosynthesis protein PurH                      | purH | 0.859 | 1.06E-01 |
| MSMEG_5516 | phosphoribosylglycinamide formyltransferase                        | purN | 0.970 | 6.46E-01 |
| MSMEG_5517 | conserved hypothetical protein                                     | NA   | 1.236 | 2.20E-01 |
| MSMEG_5518 | antigen 34 kDa                                                     | NA   | 0.950 | 5.92E-01 |
| MSMEG_5519 | monooxygenase                                                      | NA   | 0.944 | 1.98E-01 |
| MSMEG_5520 | conserved hypothetical protein                                     | NA   | 0.900 | 3.58E-01 |
| MSMEG_5521 | acetyl-CoA acetyltransferase                                       | NA   | 1.283 | 1.39E-01 |
| MSMEG_5522 | transcriptional Regulator, TetR family protein                     | NA   | 0.943 | 4.47E-01 |
| MSMEG_5523 | peptidase                                                          | NA   | 2.286 | 4.77E-01 |
| MSMEG_5524 | succinyl-CoA synthetase, alpha subunit                             | sucD | 0.835 | 8.37E-03 |
| MSMEG_5525 | succinyl-CoA synthetase, beta subunit                              | sucC | 0.803 | 1.81E-02 |
| MSMEG_5526 | peptidoglycan-binding LysM                                         | NA   | 0.938 | 2.97E-01 |
| MSMEG_5527 | conserved hypothetical protein                                     | NA   | 1.124 | 6.06E-02 |
| MSMEG_5528 | hypothetical protein                                               | NA   | 1.385 | 5.01E-01 |
| MSMEG_5529 | hypothetical protein                                               | NA   | 1.182 | 5.66E-01 |
| MSMEG_5530 | putative aliphatic sulfonates transport permease protein SsuC      | NA   | 1.020 | 8.73E-01 |
| MSMEG_5531 | ABC transporter ATP-binding protein                                | NA   | 1.073 | 7.78E-01 |
| MSMEG_5532 | FAD dependent oxidoreductase                                       | NA   | 1.007 | 9.29E-01 |
| MSMEG_5533 | 4Fe-4S ferredoxin, iron-sulfur binding                             | NA   | 1.171 | 5.11E-01 |
| MSMEG_5534 | ATP-dependent DNA helicase PcrA                                    | pcrA | 1.112 | 9.84E-02 |
| MSMEG_5535 | hypothetical protein                                               | NA   | 1.096 | 6.36E-01 |
| MSMEG_5536 | chorismate mutase                                                  | NA   | 1.129 | 2.94E-01 |
| MSMEG_5537 | conserved integral membrane protein                                | NA   | 1.043 | 7.02E-01 |
| MSMEG_5538 | [NADP+] succinate-semialdehyde dehydrogenase                       | NA   | 0.972 | 4.40E-01 |
| MSMEG_5539 | hypothetical protein                                               | NA   | 1.179 | 2.37E-01 |
| MSMEG_5540 | conserved hypothetical protein                                     | NA   | 1.076 | 6.30E-01 |
| MSMEG_5541 | glucose-6-phosphate isomerase                                      | pgi  | 0.840 | 3.56E-02 |
| MSMEG_5542 | transcriptional regulator, HTH_3 family protein                    | NA   | 1.093 | 6.78E-01 |
| MSMEG_5543 | hypothetical protein                                               | NA   | 1.217 | 4.98E-01 |
| MSMEG_5544 | oxidoreductase, short chain dehydrogenase/reductase family protein | NA   | 1.003 | 9.53E-01 |

|            |                                                                                         |      |       |          |
|------------|-----------------------------------------------------------------------------------------|------|-------|----------|
| MSMEG_5545 | formamidopyrimidine-DNA glycosylase                                                     | NA   | 1.074 | 2.90E-01 |
| MSMEG_5546 | membrane spanning protein                                                               | NA   | 0.818 | 9.48E-03 |
| MSMEG_5547 | conserved hypothetical protein                                                          | NA   | 1.223 | 2.10E-01 |
| MSMEG_5548 | precorrin-6A synthase (deacetylating)                                                   | cobF | 0.959 | 4.31E-01 |
| MSMEG_5549 | conserved hypothetical protein                                                          | NA   | 0.848 | 1.68E-01 |
| MSMEG_5550 | protein-glutamate methylesterase; this gene contains a frame shift which is not the re  | NA   | 0.982 | 9.21E-01 |
| MSMEG_5550 | protein-glutamate methylesterase; this gene contains a frame shift which is not the re  | NA   | 3.267 | 3.38E-01 |
| MSMEG_5551 | stas domain protein                                                                     | NA   | 1.172 | 4.42E-01 |
| MSMEG_5552 | conserved hypothetical protein                                                          | NA   | 0.951 | 5.97E-01 |
| MSMEG_5553 | CheR methyltransferase, SAM binding domain protein                                      | cheR | 0.932 | 1.58E-04 |
| MSMEG_5554 | antar domain protein                                                                    | NA   | 0.995 | 8.07E-01 |
| MSMEG_5555 | conserved hypothetical protein; this gene contains a frame shift which is not the resul | NA   | 1.001 | 9.92E-01 |
| MSMEG_5556 | MFS permease                                                                            | NA   | 1.296 | 1.67E-02 |
| MSMEG_5557 | conserved hypothetical protein                                                          | NA   | 0.963 | 7.12E-01 |
| MSMEG_5558 | hypothetical protein                                                                    | NA   | 1.486 | 1.97E-03 |
| MSMEG_5559 | metabolite/sugar transport protein                                                      | NA   | 1.794 | 4.27E-01 |
| MSMEG_5560 | hypothetical protein                                                                    | NA   | 1.245 | 4.23E-01 |
| MSMEG_5561 | HPP family protein                                                                      | NA   | 1.482 | 2.35E-02 |
| MSMEG_5562 | RNase H                                                                                 | rnhA | 0.798 | 1.19E-02 |
| MSMEG_5563 | AraC-family protein transcriptional regulator                                           | NA   | 1.308 | 3.39E-03 |
| MSMEG_5564 | NAD(P)H dehydrogenase, quinone family protein                                           | NA   | 0.996 | 9.62E-01 |
| MSMEG_5565 | conserved hypothetical protein                                                          | NA   | 0.854 | 1.66E-01 |
| MSMEG_5566 | transcriptional regulator                                                               | NA   | 2.310 | 3.09E-01 |
| MSMEG_5567 | transcriptional regulator, TetR family protein                                          | NA   | 1.324 | 4.58E-03 |
| MSMEG_5568 | clavaldehyde dehydrogenase                                                              | NA   | 1.434 | 1.57E-02 |
| MSMEG_5569 | clavaldehyde dehydrogenase                                                              | NA   | 1.351 | 2.83E-02 |
| MSMEG_5570 | DNA ligase                                                                              | NA   | 4.280 | 3.65E-01 |
| MSMEG_5571 | ABC transporter ATP-binding protein                                                     | NA   | 0.554 | 3.06E-03 |
| MSMEG_5572 | sugar ABC transporter permease protein                                                  | NA   | 0.567 | 1.37E-02 |
| MSMEG_5573 | sugar ABC transporter permease protein                                                  | NA   | 0.502 | 2.01E-02 |
| MSMEG_5574 | substrate binding protein                                                               | NA   | 0.520 | 1.20E-03 |

|            |                                                  |    |       |          |
|------------|--------------------------------------------------|----|-------|----------|
| MSMEG_5575 | repressor                                        | NA | 0.595 | 2.30E-03 |
| MSMEG_5576 | D-mannonate oxidoreductase                       | NA | 0.805 | 5.91E-02 |
| MSMEG_5577 | fructokinase                                     | NA | 0.841 | 4.60E-01 |
| MSMEG_5578 | hypothetical protein                             | NA | 0.951 | 5.30E-01 |
| MSMEG_5579 | MarR-family protein transcriptional regulator    | NA | 0.973 | 5.61E-01 |
| MSMEG_5580 | Ku protein                                       | NA | 1.060 | 3.36E-01 |
| MSMEG_5581 | conserved hypothetical integral membrane protein | NA | 1.049 | 4.61E-01 |
| MSMEG_5582 | hypothetical protein                             | NA | 0.800 | 1.24E-01 |
| MSMEG_5583 | HNH endonuclease                                 | NA | 1.456 | 3.88E-01 |
| MSMEG_5584 | short chain dehydrogenase                        | NA | 0.825 | 1.51E-01 |
| MSMEG_5585 | hypothetical protein                             | NA | 0.943 | 5.73E-01 |
| MSMEG_5586 | conserved hypothetical protein                   | NA | 0.638 | 3.92E-02 |
| MSMEG_5587 | hypothetical protein                             | NA | 0.850 | 2.55E-02 |
| MSMEG_5588 | hypothetical protein                             | NA | 0.937 | 4.85E-01 |
| MSMEG_5589 | manganese transport protein MntH                 | NA | 1.183 | 1.42E-01 |
| MSMEG_5590 | carboxylate-amine ligase Nfa27300                | NA | 1.131 | 6.08E-01 |
| MSMEG_5591 | conserved hypothetical protein                   | NA | 0.955 | 4.11E-01 |
| MSMEG_5592 | conserved hypothetical protein                   | NA | 0.946 | 6.88E-01 |
| MSMEG_5593 | pyruvate dehydrogenase                           | NA | 0.909 | 3.14E-01 |
| MSMEG_5594 | ferredoxin-dependent glutamate synthase          | NA | 0.933 | 1.44E-01 |
| MSMEG_5595 | MarR-family protein transcriptional regulator    | NA | 1.085 | 3.73E-01 |
| MSMEG_5596 | oxidoreductase                                   | NA | 1.484 | 3.49E-01 |
| MSMEG_5597 | transcriptional regulator, TetR family protein   | NA | 1.441 | 1.56E-01 |
| MSMEG_5599 | hypothetical protein                             | NA | 2.482 | 3.40E-01 |
| MSMEG_5600 | conserved hypothetical protein                   | NA | 1.128 | 2.82E-01 |
| MSMEG_5601 | hypothetical protein                             | NA | 1.179 | 1.32E-02 |
| MSMEG_5602 | conserved hypothetical protein                   | NA | 1.118 | 7.09E-02 |
| MSMEG_5603 | transcriptional regulator, ArsR family protein   | NA | 1.306 | 5.14E-01 |
| MSMEG_5604 | integral membrane protein                        | NA | 0.982 | 9.29E-01 |
| MSMEG_5605 | cytochrome bd ubiquinol oxidase, subunit I       | NA | 1.495 | 4.11E-01 |
| MSMEG_5606 | cytochrome bd-I oxidase subunit II               | NA | 1.890 | 3.60E-01 |

|            |                                                                    |    |        |          |
|------------|--------------------------------------------------------------------|----|--------|----------|
| MSMEG_5607 | hypothetical protein                                               | NA | 1.211  | 3.85E-01 |
| MSMEG_5608 | acetyl-CoA acetyltransferase                                       | NA | 0.755  | 7.32E-03 |
| MSMEG_5609 | carotenoid oxygenase                                               | NA | 1.237  | 1.58E-01 |
| MSMEG_5610 | putative transcriptional regulator family protein                  | NA | 1.303  | 2.55E-01 |
| MSMEG_5611 | spore protein                                                      | NA | 1.529  | 2.45E-02 |
| MSMEG_5612 | amino-acid acetyltransferase                                       | NA | 1.485  | 1.80E-02 |
| MSMEG_5613 | probable conserved transmembrane protein                           | NA | 1.345  | 1.06E-02 |
| MSMEG_5614 | conserved hypothetical protein                                     | NA | 13.013 | 3.82E-01 |
| MSMEG_5615 | conserved hypothetical protein                                     | NA | 1.293  | 3.38E-02 |
| MSMEG_5616 | glyoxalase/bleomycin resistance protein/dioxygenase                | NA | 1.306  | 3.67E-01 |
| MSMEG_5617 | immunogenic protein MPT63                                          | NA | 1.203  | 5.44E-01 |
| MSMEG_5618 | acyl-CoA dehydrogenase                                             | NA | 1.171  | 3.69E-01 |
| MSMEG_5619 | acyl-CoA dehydrogenase domain protein                              | NA | 1.110  | 4.36E-01 |
| MSMEG_5620 | enoyl-CoA hydratase                                                | NA | 0.985  | 9.05E-01 |
| MSMEG_5621 | putative acyl-CoA dehydrogenase                                    | NA | 0.874  | 1.79E-01 |
| MSMEG_5622 | putative acyl-CoA dehydrogenase                                    | NA | 0.934  | 4.85E-01 |
| MSMEG_5623 | L-carnitine dehydratase/bile acid-inducible protein F              | NA | 1.066  | 5.57E-01 |
| MSMEG_5624 | oxidoreductase, short chain dehydrogenase/reductase family protein | NA | 0.949  | 6.97E-01 |
| MSMEG_5625 | cyclododecanone monooxygenase                                      | NA | 1.172  | 6.17E-01 |
| MSMEG_5626 | luciferase                                                         | NA | 1.058  | 2.08E-01 |
| MSMEG_5627 | Rieske [2Fe-2S] domain protein                                     | NA | 0.912  | 3.27E-01 |
| MSMEG_5628 | oxidoreductase, short chain dehydrogenase/reductase family protein | NA | 1.145  | 4.79E-01 |
| MSMEG_5629 | conserved hypothetical protein                                     | NA | 0.790  | 2.09E-02 |
| MSMEG_5630 | transcriptional regulator, GntR family protein                     | NA | 1.016  | 6.79E-01 |
| MSMEG_5631 | AMP-dependent synthetase and ligase                                | NA | 1.014  | 9.32E-01 |
| MSMEG_5632 | oxidoreductase, short chain dehydrogenase/reductase family protein | NA | 0.823  | 3.09E-01 |
| MSMEG_5633 | feruloyl-CoA synthetase                                            | NA | 0.940  | 6.19E-01 |
| MSMEG_5634 | conserved hypothetical protein                                     | NA | 0.826  | 5.67E-02 |
| MSMEG_5635 | conserved hypothetical protein                                     | NA | 0.933  | 6.11E-01 |
| MSMEG_5636 | P-type ATPase - metal cation transport                             | NA | 1.107  | 2.27E-01 |
| MSMEG_5637 | penicillin-binding protein 4                                       | NA | 1.108  | 6.56E-02 |

|            |                                                                                               |      |       |          |
|------------|-----------------------------------------------------------------------------------------------|------|-------|----------|
| MSMEG_5638 | metallo-beta-lactamase family protein                                                         | NA   | 0.876 | 2.18E-01 |
| MSMEG_5639 | enoyl-CoA hydratase                                                                           | NA   | 0.968 | 7.33E-01 |
| MSMEG_5640 | amylase, alpha-1,6-glucosidase                                                                | NA   | 1.225 | 1.92E-01 |
| MSMEG_5641 | glycosyl transferase, group 1 family protein                                                  | NA   | 0.868 | 2.70E-02 |
| MSMEG_5642 | acetyl-coenzyme a carboxylase carboxyl transferase                                            | NA   | 1.132 | 2.41E-01 |
| MSMEG_5643 | conserved hypothetical protein                                                                | NA   | 1.697 | 3.74E-01 |
| MSMEG_5644 | membrane protein                                                                              | NA   | 1.082 | 4.78E-01 |
| MSMEG_5645 | conserved hypothetical protein                                                                | NA   | 1.112 | 3.61E-01 |
| MSMEG_5646 | conserved hypothetical protein                                                                | NA   | 1.571 | 4.47E-02 |
| MSMEG_5647 | conserved hypothetical protein; this gene contains a frame shift which is not the result of a | NA   | 1.298 | 1.45E-01 |
| MSMEG_5648 | hypothetical protein                                                                          | NA   | 1.004 | 9.74E-01 |
| MSMEG_5649 | acyl-CoA synthase                                                                             | NA   | 0.736 | 9.25E-02 |
| MSMEG_5650 | AMP-dependent synthetase and ligase                                                           | NA   | 2.212 | 4.20E-01 |
| MSMEG_5651 | transcriptional regulator, LuxR family protein                                                | NA   | 0.662 | 1.62E-02 |
| MSMEG_5652 | alpha/beta hydrolase fold                                                                     | NA   | 1.329 | 4.56E-01 |
| MSMEG_5653 | cytosine/purine/uracil/thiamine/allantoin permease family protein                             | NA   | 1.404 | 3.34E-01 |
| MSMEG_5654 | transcriptional regulator, LysR family protein                                                | NA   | 1.099 | 1.68E-01 |
| MSMEG_5655 | hydrolase, carbon-nitrogen family protein                                                     | NA   | 1.443 | 2.21E-01 |
| MSMEG_5656 | histidinol dehydrogenase                                                                      | hisD | 0.956 | 3.02E-01 |
| MSMEG_5657 | transcriptional regulator, LysR family protein                                                | NA   | 1.159 | 6.86E-02 |
| MSMEG_5658 | epoxide hydrolase                                                                             | NA   | 1.013 | 7.85E-01 |
| MSMEG_5659 | ABC transporter, ATP-binding protein                                                          | NA   | 1.566 | 2.22E-02 |
| MSMEG_5660 | ABC transporter ATP-binding protein                                                           | NA   | 1.495 | 1.51E-02 |
| MSMEG_5661 | ABC transporter ATP-binding protein                                                           | NA   | 1.111 | 4.21E-01 |
| MSMEG_5662 | DNA-binding response regulator PrrA                                                           | prpA | 1.195 | 8.58E-02 |
| MSMEG_5663 | sensor-type histidine kinase PrrB                                                             | NA   | 1.084 | 5.89E-01 |
| MSMEG_5664 | binding protein                                                                               | NA   | 0.912 | 1.36E-01 |
| MSMEG_5665 | hypothetical protein                                                                          | NA   | 1.041 | 7.57E-01 |
| MSMEG_5666 | conserved hypothetical protein                                                                | NA   | 1.063 | 4.12E-01 |
| MSMEG_5667 | phytoene dehydrogenase                                                                        | NA   | 1.285 | 7.07E-02 |
| MSMEG_5668 | putative transcriptional regulator                                                            | NA   | 6.087 | 3.67E-01 |

|            |                                                     |      |       |          |
|------------|-----------------------------------------------------|------|-------|----------|
| MSMEG_5670 | efflux membrane protein                             | NA   | 1.660 | 7.90E-02 |
| MSMEG_5671 | YbaK/prolyl-tRNA synthetase associated region       | NA   | 1.781 | 7.08E-02 |
| MSMEG_5672 | citrate synthase I                                  | gltA | 1.198 | 1.49E-01 |
| MSMEG_5673 | transcriptional regulator                           | NA   | 1.215 | 4.13E-01 |
| MSMEG_5674 | membrane transport protein                          | NA   | 0.942 | 6.42E-01 |
| MSMEG_5675 | pyridoxamine 5'-phosphate oxidase                   | pdxH | 0.842 | 8.59E-02 |
| MSMEG_5676 | citrate synthase                                    | NA   | 1.021 | 4.32E-01 |
| MSMEG_5677 | conserved hypothetical protein                      | NA   | 1.057 | 5.67E-01 |
| MSMEG_5678 | glyoxalase/bleomycin resistance protein/dioxygenase | NA   | 0.832 | 3.89E-03 |
| MSMEG_5679 | putative DNA-binding protein                        | NA   | 0.926 | 5.26E-01 |
| MSMEG_5680 | glyoxalase family protein                           | NA   | 0.901 | 2.05E-01 |
| MSMEG_5681 | probable ferredoxin/ferredoxin--NADP reductase      | NA   | 0.821 | 6.29E-02 |
| MSMEG_5682 | conserved hypothetical protein                      | NA   | 0.741 | 1.83E-02 |
| MSMEG_5683 | methionine aminopeptidase, type I                   | map  | 0.896 | 4.75E-01 |
| MSMEG_5684 | phosphoserine aminotransferase, putative            | NA   | 1.097 | 1.77E-01 |
| MSMEG_5685 | DNA-binding protein                                 | NA   | 1.115 | 1.91E-01 |
| MSMEG_5686 | conserved hypothetical protein                      | NA   | 1.269 | 1.99E-02 |
| MSMEG_5687 | 23s ribosomal RNA methyltransferase                 | NA   | 1.315 | 5.00E-02 |
| MSMEG_5688 | regulatory protein, MarR                            | NA   | 1.833 | 2.05E-04 |
| MSMEG_5689 | conserved hypothetical protein                      | NA   | 1.190 | 5.98E-02 |
| MSMEG_5690 | conserved hypothetical protein                      | NA   | 1.105 | 1.70E-01 |
| MSMEG_5691 | conserved hypothetical protein                      | NA   | 1.109 | 3.23E-01 |
| MSMEG_5692 | conserved hypothetical protein                      | NA   | 1.167 | 2.56E-01 |
| MSMEG_5693 | transporter, major facilitator family protein       | NA   | 1.225 | 4.15E-02 |
| MSMEG_5694 | conserved hypothetical protein                      | NA   | 1.015 | 6.46E-01 |
| MSMEG_5695 | glutathione S-transferase                           | NA   | 1.496 | 2.49E-02 |
| MSMEG_5696 | 'Cold-shock' DNA-binding domain protein             | NA   | 1.211 | 4.03E-02 |
| MSMEG_5697 | integral membrane protein                           | NA   | 0.860 | 1.26E-02 |
| MSMEG_5698 | molybdenum cofactor biosynthesis protein A          | moaA | 0.905 | 7.06E-02 |
| MSMEG_5699 | ThiS family protein                                 | NA   | 0.977 | 7.68E-01 |
| MSMEG_5700 | secreted protein                                    | NA   | 0.834 | 1.49E-02 |

|            |                                                                        |      |       |          |
|------------|------------------------------------------------------------------------|------|-------|----------|
| MSMEG_5701 | molybdopterin converting factor, subunit 2                             | moaE | 1.090 | 4.26E-01 |
| MSMEG_5702 | molybdenum cofactor synthesis domain protein                           | NA   | 0.844 | 2.04E-02 |
| MSMEG_5703 | molybdenum cofactor biosynthesis protein C                             | moaC | 0.828 | 4.69E-03 |
| MSMEG_5704 | conserved hypothetical protein                                         | NA   | 0.706 | 2.70E-03 |
| MSMEG_5705 | conserved hypothetical protein                                         | NA   | 1.319 | 1.21E-01 |
| MSMEG_5706 | DNA or RNA helicase of superfamily protein II                          | NA   | 1.041 | 1.51E-01 |
| MSMEG_5707 | cupin domain protein                                                   | NA   | 1.105 | 6.86E-03 |
| MSMEG_5708 | hypothetical protein                                                   | NA   | 0.941 | 2.53E-01 |
| MSMEG_5709 | conserved hypothetical protein                                         | NA   | 0.928 | 2.76E-01 |
| MSMEG_5710 | hypothetical protein                                                   | NA   | 0.917 | 4.04E-01 |
| MSMEG_5711 | oxidoreductase, short chain dehydrogenase/reductase family protein     | NA   | 0.852 | 4.36E-01 |
| MSMEG_5712 | LysR-family protein transcriptional regulator                          | NA   | 1.039 | 6.97E-01 |
| MSMEG_5713 | major facilitator family protein transporter                           | NA   | 1.108 | 9.44E-02 |
| MSMEG_5714 | short-chain dehydrogenase/reductase SDR                                | NA   | 0.941 | 5.19E-01 |
| MSMEG_5715 | conserved hypothetical protein                                         | NA   | 0.939 | 4.37E-01 |
| MSMEG_5716 | hypothetical protein                                                   | NA   | 0.991 | 9.66E-01 |
| MSMEG_5717 | pyridoxamine 5'-phosphate oxidase family protein                       | NA   | 0.843 | 1.53E-02 |
| MSMEG_5718 | transcriptional regulator, TetR family protein                         | NA   | 1.047 | 5.94E-01 |
| MSMEG_5719 | oxidoreductase                                                         | NA   | 1.398 | 3.29E-01 |
| MSMEG_5720 | putative 3-hydroxyacyl-CoA dehydrogenase                               | NA   | 0.832 | 3.41E-02 |
| MSMEG_5721 | acetyl-CoA acetyltransferase                                           | NA   | 0.752 | 2.38E-03 |
| MSMEG_5722 | conserved hypothetical protein                                         | NA   | 1.544 | 3.20E-01 |
| MSMEG_5723 | endoribonuclease L-psp family protein                                  | NA   | 1.218 | 4.61E-02 |
| MSMEG_5724 | bacterial regulatory protein, MarR family protein                      | NA   | 1.013 | 8.99E-01 |
| MSMEG_5725 | PLP-dependent aminotransferases                                        | NA   | 1.141 | 1.61E-01 |
| MSMEG_5726 | conserved hypothetical protein                                         | NA   | 1.018 | 8.70E-01 |
| MSMEG_5727 | allantoicase                                                           | alc  | 0.993 | 9.40E-01 |
| MSMEG_5728 | polysaccharide deacetylase family protein                              | NA   | 1.096 | 3.31E-01 |
| MSMEG_5729 | hydantoin racemase                                                     | NA   | 1.114 | 8.27E-02 |
| MSMEG_5730 | permease for cytosine/purines, uracil, thiamine, allantoin transporter | NA   | 1.145 | 4.64E-01 |
| MSMEG_5731 | transcriptional regulator, GntR family protein                         | NA   | 2.162 | 2.03E-03 |

|            |                                               |      |       |          |
|------------|-----------------------------------------------|------|-------|----------|
| MSMEG_5732 | monooxygenase                                 | NA   | 2.148 | 1.61E-02 |
| MSMEG_5733 | universal stress protein family protein       | NA   | 1.225 | 1.80E-01 |
| MSMEG_5734 | alpha-methylacyl-CoA racemase                 | NA   | 1.075 | 4.97E-01 |
| MSMEG_5735 | indole-3-pyruvate decarboxylase               | NA   | 1.138 | 4.19E-01 |
| MSMEG_5736 | cyclase/dehydrase                             | NA   | 1.028 | 7.32E-01 |
| MSMEG_5737 | hypothetical protein                          | NA   | 1.057 | 7.98E-01 |
| MSMEG_5738 | conserved hypothetical protein                | NA   | 1.165 | 2.30E-01 |
| MSMEG_5739 | putative long-chain fatty-acid--CoA ligase    | NA   | 3.212 | 1.86E-01 |
| MSMEG_5740 | hypothetical protein                          | NA   | 1.174 | 8.11E-02 |
| MSMEG_5741 | conserved hypothetical protein                | NA   | 1.294 | 8.97E-02 |
| MSMEG_5742 | acyltransferase domain protein                | NA   | 1.084 | 7.05E-01 |
| MSMEG_5743 | patatin                                       | NA   | 1.186 | 9.62E-02 |
| MSMEG_5744 | gas vesicle protein K                         | gvpK | 1.346 | 2.89E-01 |
| MSMEG_5745 | gas vesicle synthesis protein                 | NA   | 0.989 | 9.01E-01 |
| MSMEG_5746 | gas vesicle protein                           | NA   | 0.931 | 2.63E-01 |
| MSMEG_5747 | hypothetical protein                          | NA   | 1.012 | 8.66E-01 |
| MSMEG_5748 | hypothetical protein                          | NA   | 0.955 | 2.44E-01 |
| MSMEG_5749 | hypothetical protein                          | NA   | 0.856 | 4.19E-02 |
| MSMEG_5750 | hypothetical protein                          | NA   | 1.063 | 3.32E-02 |
| MSMEG_5751 | putative adhesin/hemolysin                    | NA   | 1.023 | 7.33E-01 |
| MSMEG_5752 | conserved hypothetical protein                | NA   | 1.321 | 5.97E-01 |
| MSMEG_5753 | serine/threonine specific protein phosphatase | NA   | 1.730 | 5.80E-03 |
| MSMEG_5754 | gp41 protein                                  | NA   | 1.133 | 4.02E-01 |
| MSMEG_5759 | pe family protein                             | NA   | 1.038 | 7.82E-01 |
| MSMEG_5760 | GntR-family protein regulator                 | NA   | 2.393 | 3.88E-01 |
| MSMEG_5761 | cupin domain protein                          | NA   | 1.190 | 3.09E-01 |
| MSMEG_5762 | zinc-binding oxidoreductase                   | NA   | 1.369 | 3.41E-01 |
| MSMEG_5763 | conserved hypothetical protein                | NA   | 1.297 | 3.36E-01 |
| MSMEG_5764 | putative cyanamide hydratase                  | NA   | 0.974 | 5.07E-01 |
| MSMEG_5765 | globin                                        | NA   | 1.129 | 5.60E-01 |
| MSMEG_5766 | conserved hypothetical protein                | NA   | 0.933 | 3.44E-01 |



|            |                                                                                          |      |       |          |
|------------|------------------------------------------------------------------------------------------|------|-------|----------|
| MSMEG_5767 | conserved hypothetical protein                                                           | NA   | 1.095 | 1.32E-01 |
| MSMEG_5768 | conserved hypothetical protein                                                           | NA   | 1.041 | 5.13E-01 |
| MSMEG_5769 | hypothetical protein                                                                     | NA   | 1.317 | 2.28E-03 |
| MSMEG_5770 | hypothetical protein                                                                     | NA   | 1.226 | 4.52E-02 |
| MSMEG_5771 | hypothetical protein                                                                     | NA   | 1.198 | 1.16E-02 |
| MSMEG_5772 | cytospin-A, putative                                                                     | NA   | 1.513 | 2.05E-02 |
| MSMEG_5773 | fatty acid desaturase                                                                    | NA   | 1.281 | 1.11E-01 |
| MSMEG_5774 | tRNA-dihydrouridine synthase, putative                                                   | NA   | 1.195 | 1.21E-01 |
| MSMEG_5775 | LytR/CpsA/Psr family protein                                                             | NA   | 1.164 | 9.24E-03 |
| MSMEG_5776 | phosphate transport system regulatory protein PhoU                                       | phoU | 1.147 | 7.09E-02 |
| MSMEG_5777 | transcription regulator                                                                  | NA   | 1.275 | 1.12E-01 |
| MSMEG_5778 | alcohol dehydrogenase, zinc-binding                                                      | NA   | 1.513 | 7.39E-02 |
| MSMEG_5779 | phosphate ABC transporter, ATP-binding protein                                           | pstB | 1.329 | 2.87E-02 |
| MSMEG_5780 | phosphate ABC transporter, permease protein PstA                                         | pstA | 1.413 | 5.49E-02 |
| MSMEG_5781 | phosphate ABC transporter, permease protein PstC                                         | pstC | 1.714 | 1.11E-03 |
| MSMEG_5782 | phosphate ABC transporter, phosphate-binding protein PstS                                | pstS | 1.850 | 8.41E-04 |
| MSMEG_5783 | acetyltransferase, GNAT family; this gene contains a frame shift which is not the result | NA   | 0.995 | 9.08E-01 |
| MSMEG_5784 | transcriptional regulatory protein                                                       | NA   | 0.902 | 7.42E-04 |
| MSMEG_5785 | probable exported protein                                                                | NA   | 1.029 | 6.26E-01 |
| MSMEG_5786 | thioredoxin                                                                              | NA   | 1.195 | 3.71E-02 |
| MSMEG_5787 | hypothetical protein                                                                     | NA   | 2.469 | 3.39E-01 |
| MSMEG_5788 | integral membrane protein                                                                | NA   | 0.978 | 7.90E-01 |
| MSMEG_5789 | putative thiosulfate sulfurtransferase                                                   | NA   | 1.016 | 8.34E-01 |
| MSMEG_5790 | SseC protein                                                                             | NA   | 1.349 | 1.47E-01 |
| MSMEG_5791 | conserved hypothetical protein                                                           | NA   | 1.073 | 3.86E-01 |
| MSMEG_5792 | conserved hypothetical protein                                                           | NA   | 1.061 | 4.69E-01 |
| MSMEG_5793 | hypothetical protein                                                                     | NA   | 0.910 | 2.37E-01 |
| MSMEG_5794 | hypothetical protein                                                                     | NA   | 0.718 | 6.62E-02 |
| MSMEG_5795 | 4-amino-4-deoxychorismate lyase                                                          | NA   | 1.052 | 3.30E-01 |
| MSMEG_5796 | Glycine cleavage T-protein (aminomethyl transferase)                                     | NA   | 1.233 | 4.02E-02 |
| MSMEG_5797 | conserved hypothetical protein                                                           | NA   | 1.593 | 1.16E-01 |

|            |                                                                      |      |       |          |
|------------|----------------------------------------------------------------------|------|-------|----------|
| MSMEG_5798 | phosphoribosylformylglycinamide cyclo-ligase                         | purM | 1.004 | 8.96E-01 |
| MSMEG_5799 | nucleoside-diphosphate-sugar epimerase                               | NA   | 1.136 | 5.70E-01 |
| MSMEG_5800 | amidophosphoribosyltransferase                                       | purF | 0.999 | 9.78E-01 |
| MSMEG_5801 | hydroxylase                                                          | NA   | 0.942 | 5.57E-01 |
| MSMEG_5802 | oxidoreductase, short chain dehydrogenase/reductase family protein   | NA   | 1.134 | 2.62E-01 |
| MSMEG_5803 | hypothetical protein                                                 | NA   | 1.078 | 3.12E-01 |
| MSMEG_5804 | conserved hypothetical protein                                       | NA   | 0.954 | 5.38E-01 |
| MSMEG_5805 | hypothetical protein                                                 | NA   | 0.942 | 3.69E-01 |
| MSMEG_5806 | hypothetical protein                                                 | NA   | 1.015 | 9.29E-01 |
| MSMEG_5807 | D-methionine transport ATP-binding protein MetN                      | NA   | 1.372 | 1.55E-01 |
| MSMEG_5808 | binding-protein-dependent transport systems inner membrane component | NA   | 1.127 | 3.31E-01 |
| MSMEG_5809 | lipoprotein YaeC, putative                                           | NA   | 0.988 | 9.35E-01 |
| MSMEG_5810 | putative monooxygenase                                               | NA   | 1.033 | 7.90E-01 |
| MSMEG_5811 | transcriptional regulator, TetR family protein                       | NA   | 1.056 | 3.75E-01 |
| MSMEG_5812 | carveol dehydrogenase                                                | NA   | 1.250 | 2.66E-01 |
| MSMEG_5813 | carveol dehydrogenase                                                | NA   | 0.981 | 9.59E-01 |
| MSMEG_5814 | 4-carboxymuconolactone decarboxylase domain protein                  | pcaC | 0.713 | 1.32E-01 |
| MSMEG_5815 | betaine aldehyde dehydrogenase                                       | NA   | 2.110 | 4.29E-01 |
| MSMEG_5816 | conserved hypothetical protein                                       | NA   | 1.344 | 1.90E-02 |
| MSMEG_5817 | conserved hypothetical protein                                       | NA   | 1.081 | 3.17E-01 |
| MSMEG_5818 | virulence factor Mce family protein                                  | NA   | 1.366 | 2.56E-01 |
| MSMEG_5819 | pyridoxamine 5'-phosphate oxidase family protein                     | NA   | 0.953 | 4.88E-01 |
| MSMEG_5820 | hypothetical protein                                                 | NA   | 1.182 | 1.75E-01 |
| MSMEG_5821 | caax amino protease family protein                                   | NA   | 1.673 | 2.51E-01 |
| MSMEG_5822 | conserved hypothetical protein                                       | NA   | 0.851 | 2.00E-01 |
| MSMEG_5823 | conserved membrane-spanning protein                                  | NA   | 1.130 | 3.77E-01 |
| MSMEG_5824 | phosphoribosylformylglycinamide synthase II                          | purL | 1.027 | 5.32E-01 |
| MSMEG_5825 | Na <sup>+</sup> /H <sup>+</sup> antiporter                           | NA   | 1.284 | 1.93E-01 |
| MSMEG_5826 | pyruvate decarboxylase                                               | NA   | 0.897 | 3.61E-01 |
| MSMEG_5827 | glyoxalase family protein                                            | NA   | 1.035 | 6.28E-01 |
| MSMEG_5828 | aspartyl aminopeptidase                                              | NA   | 1.106 | 2.80E-01 |

|            |                                                                                               |      |       |          |
|------------|-----------------------------------------------------------------------------------------------|------|-------|----------|
| MSMEG_5829 | Dyp-type peroxidase                                                                           | NA   | 0.920 | 2.49E-02 |
| MSMEG_5830 | 29 kda antigen Cfp29                                                                          | NA   | 0.843 | 3.57E-02 |
| MSMEG_5831 | phosphoribosylformylglycinamide synthase I                                                    | purQ | 0.947 | 4.78E-01 |
| MSMEG_5832 | phosphoribosylformylglycinamide synthase, PurS protein                                        | purS | 1.009 | 8.43E-01 |
| MSMEG_5833 | conserved hypothetical protein; this gene contains a frame shift which is not the result of a | NA   | 1.503 | 5.84E-02 |
| MSMEG_5834 | metallo-beta-lactamase superfamily protein                                                    | NA   | 1.006 | 8.61E-01 |
| MSMEG_5835 | fumarate reductase/succinate dehydrogenase flavoprotein                                       | NA   | 1.039 | 7.40E-01 |
| MSMEG_5836 | conserved hypothetical protein                                                                | NA   | 1.312 | 1.13E-01 |
| MSMEG_5837 | glutathione peroxidase family protein                                                         | NA   | 0.890 | 6.49E-03 |
| MSMEG_5838 | TetR-family protein transcriptional regulator                                                 | NA   | 1.045 | 2.97E-01 |
| MSMEG_5839 | protease 2                                                                                    | NA   | 0.989 | 8.16E-01 |
| MSMEG_5840 | conserved hypothetical protein                                                                | NA   | 0.998 | 9.67E-01 |
| MSMEG_5841 | phosphoribosylaminoimidazole-succinocarboxamide synthase                                      | purC | 1.032 | 7.01E-01 |
| MSMEG_5842 | conserved hypothetical protein                                                                | NA   | 0.858 | 2.51E-01 |
| MSMEG_5843 | conserved hypothetical protein                                                                | NA   | 1.032 | 3.72E-01 |
| MSMEG_5844 | conserved hypothetical protein                                                                | NA   | 1.058 | 8.40E-01 |
| MSMEG_5845 | putative C4-dicarboxylate transporter                                                         | NA   | 1.050 | 7.11E-01 |
| MSMEG_5846 | NikQ protein                                                                                  | NA   | 1.232 | 2.01E-01 |
| MSMEG_5847 | adenylosuccinate lyase                                                                        | purB | 1.127 | 2.67E-01 |
| MSMEG_5848 | amino acid permease-associated region                                                         | NA   | 1.001 | 9.81E-01 |
| MSMEG_5849 | conserved hypothetical protein                                                                | NA   | 1.111 | 8.42E-02 |
| MSMEG_5850 | transcriptional regulator, TetR family protein                                                | NA   | 0.997 | 9.79E-01 |
| MSMEG_5851 | putative esterase superfamily protein                                                         | NA   | 1.444 | 3.55E-01 |
| MSMEG_5852 | phosphoribosylamine--glycine ligase                                                           | purD | 1.012 | 8.67E-01 |
| MSMEG_5853 | cytochrome P450                                                                               | NA   | 0.905 | 5.41E-01 |
| MSMEG_5854 | transcriptional regulator, TetR family protein                                                | NA   | 0.950 | 1.19E-01 |
| MSMEG_5855 | conserved hypothetical protein                                                                | NA   | 1.249 | 4.21E-01 |
| MSMEG_5856 | 4-carboxymuconolactone decarboxylase domain protein                                           | pcaC | 0.670 | 1.09E-03 |
| MSMEG_5857 | hypothetical oxidoreductase                                                                   | NA   | 0.794 | 9.12E-02 |
| MSMEG_5858 | 3-oxoacyl-[acyl-carrier-protein] reductase                                                    | NA   | 1.000 | 9.99E-01 |
| MSMEG_5859 | aldehyde dehydrogenase (NAD) family protein                                                   | NA   | 0.840 | 3.48E-01 |

|            |                                                              |      |       |          |
|------------|--------------------------------------------------------------|------|-------|----------|
| MSMEG_5860 | transcriptional regulator, TetR family protein               | NA   | 1.013 | 8.43E-01 |
| MSMEG_5861 | cytochrome P450 109                                          | NA   | 0.903 | 5.28E-01 |
| MSMEG_5862 | short chain dehydrogenase                                    | NA   | 0.926 | 4.01E-01 |
| MSMEG_5863 | cytochrome P450 51                                           | NA   | 0.849 | 4.62E-02 |
| MSMEG_5864 | cytochrome P450 51                                           | NA   | 0.804 | 6.17E-02 |
| MSMEG_5865 | conserved hypothetical protein                               | NA   | 1.008 | 9.27E-01 |
| MSMEG_5866 | alcohol dehydrogenase B                                      | NA   | 0.634 | 4.29E-02 |
| MSMEG_5867 | nuclear transport factor 2 (NTF2) domain superfamily protein | NA   | 0.937 | 3.32E-01 |
| MSMEG_5868 | hypothetical protein                                         | NA   | 1.134 | 2.68E-01 |
| MSMEG_5869 | putative short chain dehydrogenase                           | NA   | 0.896 | 5.95E-01 |
| MSMEG_5870 | sensor histidine kinase PhoR                                 | NA   | 1.160 | 4.84E-01 |
| MSMEG_5871 | HIT family protein                                           | NA   | 1.053 | 1.27E-01 |
| MSMEG_5872 | DNA-binding response regulator PhoP                          | phoP | 0.872 | 2.32E-01 |
| MSMEG_5873 | conserved hypothetical protein                               | NA   | 1.172 | 6.89E-02 |
| MSMEG_5875 | hypothetical protein                                         | NA   | 0.951 | 3.61E-01 |
| MSMEG_5876 | H-N-H endonuclease F-TflIV                                   | NA   | 1.168 | 1.16E-01 |
| MSMEG_5877 | conserved hypothetical protein                               | NA   | 0.953 | 6.43E-01 |
| MSMEG_5878 | serine esterase, cutinase family protein                     | NA   | 0.861 | 2.37E-01 |
| MSMEG_5879 | D-alanyl-D-alanine dipeptidase                               | NA   | 0.892 | 1.34E-01 |
| MSMEG_5880 | nicotine dehydrogenase                                       | NA   | 1.226 | 3.98E-01 |
| MSMEG_5881 | putative carbon monoxide dehydrogenase subunit G             | NA   | 0.788 | 1.57E-01 |
| MSMEG_5882 | carbon monoxide dehydrogenase medium chain                   | NA   | 0.970 | 7.50E-01 |
| MSMEG_5883 | [2Fe-2S] binding domain protein                              | NA   | 1.171 | 6.25E-01 |
| MSMEG_5884 | 3-hydroxyisobutyrate dehydrogenase family protein            | NA   | 1.987 | 3.55E-01 |
| MSMEG_5885 | short chain dehydrogenase                                    | NA   | 0.876 | 8.42E-03 |
| MSMEG_5886 | enoyl-CoA hydratase                                          | NA   | 0.889 | 2.48E-01 |
| MSMEG_5887 | intersectin-EH binding protein lbp1                          | NA   | 1.007 | 9.44E-01 |
| MSMEG_5888 | conserved hypothetical protein                               | NA   | 1.141 | 2.83E-01 |
| MSMEG_5889 | conserved hypothetical protein                               | NA   | 0.927 | 1.75E-03 |
| MSMEG_5890 | conserved hypothetical protein                               | NA   | 0.993 | 9.20E-01 |
| MSMEG_5892 | alpha,alpha-trehalose-phosphate synthase (UDP-forming)       | NA   | 1.141 | 2.70E-01 |

|            |                                                                    |    |       |          |
|------------|--------------------------------------------------------------------|----|-------|----------|
| MSMEG_5893 | conserved hypothetical protein                                     | NA | 0.818 | 1.52E-02 |
| MSMEG_5894 | conserved hypothetical protein                                     | NA | 0.734 | 2.52E-04 |
| MSMEG_5895 | virulence factor mce family protein                                | NA | 0.703 | 8.92E-04 |
| MSMEG_5896 | virulence factor Mce family protein                                | NA | 0.817 | 2.39E-03 |
| MSMEG_5897 | virulence factor mce family protein                                | NA | 0.751 | 6.80E-03 |
| MSMEG_5898 | virulence factor Mce family protein                                | NA | 0.927 | 1.96E-03 |
| MSMEG_5899 | virulence factor Mce family protein                                | NA | 0.875 | 7.08E-02 |
| MSMEG_5900 | virulence factor Mce family protein                                | NA | 0.800 | 2.36E-03 |
| MSMEG_5901 | TrnB2 protein                                                      | NA | 0.883 | 4.51E-02 |
| MSMEG_5902 | conserved hypothetical protein                                     | NA | 0.892 | 6.52E-02 |
| MSMEG_5903 | oxidoreductase, short chain dehydrogenase/reductase family protein | NA | 0.936 | 2.94E-01 |
| MSMEG_5904 | conserved domain protein                                           | NA | 0.827 | 1.58E-01 |
| MSMEG_5905 | hypothetical protein                                               | NA | 1.005 | 9.83E-01 |
| MSMEG_5906 | putative acyl-CoA dehydrogenase                                    | NA | 1.091 | 6.02E-01 |
| MSMEG_5907 | acyl-CoA dehydrogenase                                             | NA | 1.093 | 4.96E-01 |
| MSMEG_5908 | acyl-CoA synthase                                                  | NA | 1.199 | 3.57E-01 |
| MSMEG_5909 | oxidoreductase                                                     | NA | 0.771 | 2.30E-01 |
| MSMEG_5910 | quinone binding protein                                            | NA | 1.014 | 8.29E-01 |
| MSMEG_5911 | AraC family protein transcriptional regulator                      | NA | 1.087 | 4.87E-01 |
| MSMEG_5912 | succinic semialdehyde dehydrogenase                                | NA | 0.791 | 5.92E-02 |
| MSMEG_5913 | dioxygenase                                                        | NA | 1.276 | 3.86E-01 |
| MSMEG_5914 | acyl-CoA synthase                                                  | NA | 1.118 | 6.34E-01 |
| MSMEG_5915 | enoyl-CoA hydratase                                                | NA | 1.071 | 3.86E-01 |
| MSMEG_5916 | hypothetical protein                                               | NA | 1.014 | 9.24E-01 |
| MSMEG_5917 | conserved hypothetical protein                                     | NA | 0.812 | 2.26E-01 |
| MSMEG_5918 | P450 heme-thiolate protein                                         | NA | 1.487 | 3.64E-01 |
| MSMEG_5919 | conserved hypothetical protein                                     | NA | 1.295 | 4.09E-01 |
| MSMEG_5920 | FMN-dependent monooxygenase                                        | NA | 0.921 | 4.62E-02 |
| MSMEG_5921 | conserved hypothetical protein                                     | NA | 1.007 | 9.70E-01 |
| MSMEG_5922 | lipid-transfer protein                                             | NA | 0.954 | 8.08E-01 |
| MSMEG_5923 | acetyl-CoA acetyltransferase                                       | NA | 1.054 | 6.54E-01 |

|            |                                                           |      |       |          |
|------------|-----------------------------------------------------------|------|-------|----------|
| MSMEG_5924 | conserved hypothetical protein                            | NA   | 0.860 | 1.05E-01 |
| MSMEG_5925 | Rieske [2Fe-2S] domain protein                            | NA   | 0.930 | 3.51E-01 |
| MSMEG_5926 | putative secreted protein                                 | NA   | 1.398 | 1.30E-01 |
| MSMEG_5927 | conserved hypothetical protein                            | NA   | 1.141 | 2.87E-01 |
| MSMEG_5928 | conserved hypothetical protein                            | NA   | 1.530 | 4.74E-02 |
| MSMEG_5929 | conserved hypothetical protein                            | NA   | 1.206 | 6.75E-02 |
| MSMEG_5930 | conserved hypothetical protein                            | NA   | 0.906 | 2.18E-01 |
| MSMEG_5931 | short chain dehydrogenase                                 | NA   | 0.989 | 9.37E-01 |
| MSMEG_5932 | conserved hypothetical protein                            | NA   | 1.000 | 1.00E+00 |
| MSMEG_5933 | conserved hypothetical protein                            | NA   | 1.319 | 1.35E-02 |
| MSMEG_5934 | conserved hypothetical protein                            | NA   | 1.261 | 5.19E-01 |
| MSMEG_5935 | ATP-dependent DNA helicase                                | NA   | 1.165 | 3.36E-01 |
| MSMEG_5936 | conserved hypothetical protein                            | NA   | 1.035 | 4.38E-01 |
| MSMEG_5937 | 4-hydroxy-2-oxovalerate aldolase                          | NA   | 0.840 | 3.03E-02 |
| MSMEG_5938 | hypothetical protein                                      | NA   | 1.005 | 8.40E-01 |
| MSMEG_5939 | acetaldehyde dehydrogenase                                | NA   | 0.805 | 4.38E-03 |
| MSMEG_5940 | 2-keto-4-pentenoate hydratase                             | NA   | 0.890 | 9.01E-02 |
| MSMEG_5941 | 3-ketosteroid dehydrogenase                               | NA   | 1.132 | 4.69E-02 |
| MSMEG_5942 | AMP-dependent synthetase and ligase                       | NA   | 0.968 | 7.72E-01 |
| MSMEG_5943 | putative peroxisomal multifunctional enzyme type 2        | NA   | 1.036 | 5.82E-01 |
| MSMEG_5944 | glucose-methanol-choline oxidoreductase                   | NA   | 1.533 | 1.96E-01 |
| MSMEG_5945 | conserved hypothetical protein                            | NA   | 1.185 | 6.13E-01 |
| MSMEG_5946 | hypothetical protein                                      | NA   | 0.978 | 9.28E-01 |
| MSMEG_5947 | serine O-acetyltransferase                                | cysE | 0.914 | 2.32E-01 |
| MSMEG_5948 | glycosyl transferase                                      | NA   | 1.008 | 9.56E-01 |
| MSMEG_5949 | conserved hypothetical protein                            | NA   | 0.938 | 5.09E-01 |
| MSMEG_5950 | putative colanic acid biosynthesis acetyltransferase WcaF | NA   | 0.995 | 9.80E-01 |
| MSMEG_5951 | glycosyl transferase, group 1, putative                   | NA   | 1.045 | 6.09E-01 |
| MSMEG_5952 | conserved hypothetical protein, putative                  | NA   | 0.832 | 1.42E-01 |
| MSMEG_5953 | hypothetical protein                                      | NA   | 1.344 | 3.87E-01 |
| MSMEG_5954 | cell surface polysaccharide biosynthesis, putative        | NA   | 1.053 | 3.14E-01 |

|            |                                                                    |      |       |          |
|------------|--------------------------------------------------------------------|------|-------|----------|
| MSMEG_5955 | protein-tyrosine kinase, putative                                  | NA   | 1.033 | 7.48E-01 |
| MSMEG_5956 | NAD dependent epimerase/dehydratase family protein                 | NA   | 1.032 | 8.66E-01 |
| MSMEG_5957 | GDP-mannose 6-dehydrogenase AlgD                                   | algD | 1.018 | 5.49E-01 |
| MSMEG_5958 | hypothetical protein                                               | NA   | 1.000 | 9.97E-01 |
| MSMEG_5959 | conserved hypothetical protein                                     | NA   | 0.748 | 8.51E-02 |
| MSMEG_5960 | O-antigen polymerase, putative                                     | NA   | 1.078 | 5.55E-01 |
| MSMEG_5961 | glycosyl transferase, group 2 family protein, putative             | NA   | 0.959 | 7.89E-01 |
| MSMEG_5962 | glycosyl transferase, family protein 2                             | NA   | 0.935 | 5.39E-01 |
| MSMEG_5963 | glycosyl transferase, family protein 2                             | NA   | 0.904 | 3.40E-01 |
| MSMEG_5964 | glycosyl transferase, group 1, putative                            | NA   | 1.184 | 4.66E-01 |
| MSMEG_5965 | hypothetical protein                                               | NA   | 0.808 | 1.40E-01 |
| MSMEG_5966 | oxidoreductase, short chain dehydrogenase/reductase family protein | NA   | 0.890 | 7.27E-02 |
| MSMEG_5967 | glucose-methanol-choline oxidoreductase                            | NA   | 0.994 | 9.34E-01 |
| MSMEG_5968 | polysaccharide biosynthesis protein                                | NA   | 0.836 | 6.12E-02 |
| MSMEG_5969 | conserved hypothetical protein                                     | NA   | 1.106 | 2.93E-01 |
| MSMEG_5970 | probable glutamate-1-semialdehyde 2,1-aminomutase                  | NA   | 1.034 | 8.51E-01 |
| MSMEG_5971 | conserved hypothetical protein                                     | NA   | 2.817 | 3.59E-01 |
| MSMEG_5972 | hypothetical protein                                               | NA   | 1.019 | 8.27E-01 |
| MSMEG_5973 | hypothetical protein                                               | NA   | 0.934 | 5.77E-01 |
| MSMEG_5974 | hypothetical protein                                               | NA   | 1.759 | 3.52E-01 |
| MSMEG_5975 | methyltransferase type 12, putative                                | NA   | 0.773 | 1.41E-01 |
| MSMEG_5976 | epimerase/dehydratase                                              | NA   | 0.933 | 4.21E-01 |
| MSMEG_5977 | dTDP-4-dehydrorhamnose 3,5-epimerase                               | rfbC | 1.402 | 3.72E-01 |
| MSMEG_5978 | GlcNAc-PI de-N-acetylase family protein                            | NA   | 0.673 | 5.04E-03 |
| MSMEG_5979 | transferase                                                        | NA   | 0.717 | 7.19E-03 |
| MSMEG_5980 | methyltransferase                                                  | NA   | 1.032 | 7.58E-01 |
| MSMEG_5981 | glycosyl transferase, putative                                     | NA   | 1.304 | 4.44E-01 |
| MSMEG_5982 | UDP-glucose 6-dehydrogenase                                        | NA   | 1.200 | 7.41E-02 |
| MSMEG_5983 | glucose-1-phosphate thymidyltransferase                            | rfbA | 1.165 | 2.44E-01 |
| MSMEG_5984 | undecaprenyl-phosphate galactosephosphotransferase                 | NA   | 1.260 | 2.27E-01 |
| MSMEG_5985 | NAD dependent epimerase/dehydratase family protein                 | NA   | 0.900 | 4.80E-01 |

|            |                                                                                                |      |       |          |
|------------|------------------------------------------------------------------------------------------------|------|-------|----------|
| MSMEG_5986 | glucosamine--fructose-6-phosphate aminotransferase, isomerizing                                | glmS | 1.539 | 1.23E-01 |
| MSMEG_5987 | two-component regulator                                                                        | NA   | 1.007 | 8.90E-01 |
| MSMEG_5988 | hypothetical protein                                                                           | NA   | 0.989 | 6.14E-01 |
| MSMEG_5989 | hypothetical protein                                                                           | NA   | 1.087 | 1.01E-01 |
| MSMEG_5990 | lipid-transfer protein                                                                         | NA   | 2.880 | 3.73E-01 |
| MSMEG_5991 | MaoC like domain, putative                                                                     | NA   | 1.391 | 4.98E-01 |
| MSMEG_5992 | conserved hypothetical protein                                                                 | NA   | 1.942 | 3.94E-01 |
| MSMEG_5993 | putative acyl-CoA dehydrogenase                                                                | NA   | 0.825 | 3.14E-01 |
| MSMEG_5994 | putative acyl-CoA dehydrogenase                                                                | NA   | 0.909 | 4.57E-01 |
| MSMEG_5995 | P450 heme-thiolate protein                                                                     | NA   | 1.057 | 7.15E-01 |
| MSMEG_5996 | acetyl-CoA acetyltransferase                                                                   | NA   | 1.081 | 7.35E-02 |
| MSMEG_5997 | conserved hypothetical protein                                                                 | NA   | 1.216 | 4.88E-01 |
| MSMEG_5998 | conserved hypothetical protein                                                                 | NA   | 1.049 | 6.03E-01 |
| MSMEG_5999 | short chain dehydrogenase                                                                      | NA   | 0.934 | 4.75E-01 |
| MSMEG_6000 | short chain dehydrogenase                                                                      | NA   | 1.243 | 2.28E-01 |
| MSMEG_6001 | enoyl-CoA hydratase                                                                            | NA   | 0.895 | 1.93E-01 |
| MSMEG_6002 | coenzyme A transferase, subunit A                                                              | NA   | 1.032 | 7.45E-01 |
| MSMEG_6003 | coenzyme A transferase, subunit B                                                              | NA   | 0.995 | 9.59E-01 |
| MSMEG_6004 | oxidoreductase, 2-nitropropane dioxygenase family protein                                      | NA   | 0.962 | 7.25E-01 |
| MSMEG_6005 | conserved hypothetical protein                                                                 | NA   | 1.364 | 2.71E-01 |
| MSMEG_6006 | conserved hypothetical protein                                                                 | NA   | 1.127 | 3.20E-02 |
| MSMEG_6007 | cation diffusion facilitator family transporter; this gene contains a frame shift which is     | NA   | 0.871 | 3.82E-01 |
| MSMEG_6007 | cation diffusion facilitator family transporter; this gene contains a frame shift which is     | NA   | 1.308 | 1.96E-01 |
| MSMEG_6008 | acetyl-CoA acetyltransferase                                                                   | NA   | 0.960 | 3.19E-01 |
| MSMEG_6009 | transcriptional regulator, TetR family protein                                                 | NA   | 1.052 | 4.31E-01 |
| MSMEG_6010 | hypothetical protein                                                                           | NA   | 1.703 | 2.27E-01 |
| MSMEG_6011 | short chain dehydrogenase                                                                      | NA   | 1.328 | 5.12E-02 |
| MSMEG_6012 | putative acyl-CoA dehydrogenase                                                                | NA   | 1.220 | 1.29E-01 |
| MSMEG_6013 | probable fatty-acid-coa ligase fadD3 (fatty-acid-coa synthetase); this gene contains a fr fadD |      | 1.116 | 6.33E-01 |
| MSMEG_6013 | probable fatty-acid-coa ligase fadD3 (fatty-acid-coa synthetase); this gene contains a fr fadD |      | 1.368 | 1.76E-01 |
| MSMEG_6014 | putative acyl-CoA dehydrogenase                                                                | NA   | 1.066 | 7.49E-01 |



|            |                                                                                        |      |       |          |
|------------|----------------------------------------------------------------------------------------|------|-------|----------|
| MSMEG_6015 | putative acyl-CoA dehydrogenase                                                        | NA   | 0.946 | 6.25E-01 |
| MSMEG_6016 | putative acyl-CoA dehydrogenase                                                        | NA   | 0.915 | 3.89E-01 |
| MSMEG_6017 | aminotransferase, class I                                                              | NA   | 0.965 | 7.64E-01 |
| MSMEG_6018 | xylose transport system permease protein XylH                                          | NA   | 0.627 | 2.39E-02 |
| MSMEG_6019 | ABC-type sugar transport system ATPase component                                       | NA   | 1.202 | 7.50E-01 |
| MSMEG_6020 | D-xylose-binding periplasmic protein                                                   | NA   | 0.905 | 5.15E-01 |
| MSMEG_6021 | xylose isomerase                                                                       | xylA | 0.608 | 2.57E-02 |
| MSMEG_6022 | xylose repressor, ROK-family protein transcriptional regulator                         | NA   | 1.084 | 3.13E-01 |
| MSMEG_6023 | transposase                                                                            | NA   | 1.147 | 2.44E-01 |
| MSMEG_6024 | acetoacetyl-CoA synthase                                                               | NA   | 1.002 | 9.56E-01 |
| MSMEG_6025 | conserved hypothetical protein                                                         | NA   | 1.216 | 3.81E-01 |
| MSMEG_6026 | 3-hydroxybutyrate dehydrogenase                                                        | NA   | 0.715 | 1.64E-02 |
| MSMEG_6027 | major facilitator superfamily protein MFS_1                                            | NA   | 0.607 | 4.43E-02 |
| MSMEG_6028 | transcriptional regulator, LysR family protein                                         | NA   | 1.050 | 5.72E-01 |
| MSMEG_6029 | conserved hypothetical protein                                                         | NA   | 0.769 | 2.97E-02 |
| MSMEG_6030 | cytochrome p450                                                                        | NA   | 1.539 | 8.37E-03 |
| MSMEG_6031 | carveol dehydrogenase                                                                  | NA   | 1.628 | 1.26E-01 |
| MSMEG_6032 | transcriptional regulator, TetR family protein                                         | NA   | 1.070 | 1.95E-01 |
| MSMEG_6033 | hypothetical protein                                                                   | NA   | 0.954 | 4.97E-01 |
| MSMEG_6034 | hypothetical protein                                                                   | NA   | 0.985 | 7.64E-01 |
| MSMEG_6035 | nitrilotriacetate monooxygenase component B                                            | NA   | 0.956 | 8.19E-01 |
| MSMEG_6036 | biphenyl-2,3-diol 1,2-dioxygenase                                                      | NA   | 0.979 | 8.91E-01 |
| MSMEG_6037 | 2-hydroxy-6-keonona-2,4-dienedioic acid hydrolase                                      | NA   | 0.857 | 3.52E-02 |
| MSMEG_6038 | pigment production hydroxylase                                                         | NA   | 0.891 | 1.27E-01 |
| MSMEG_6039 | oxidoreductase, electron transfer component                                            | NA   | 1.214 | 1.06E-01 |
| MSMEG_6040 | conserved hypothetical protein                                                         | NA   | 1.039 | 5.86E-01 |
| MSMEG_6041 | putative acyl-CoA dehydrogenase                                                        | NA   | 1.180 | 2.97E-01 |
| MSMEG_6042 | transcriptional regulator, TetR family protein                                         | NA   | 1.383 | 4.09E-03 |
| MSMEG_6043 | trehalose-phosphatase                                                                  | otsB | 1.155 | 2.26E-01 |
| MSMEG_6044 | periplasmic binding proteins and sugar binding domain of the LacI family protein, puta | NA   | 1.196 | 2.13E-01 |
| MSMEG_6045 | ABC heavy metal transporter, inner membrane subunit                                    | NA   | 1.110 | 1.30E-01 |

|            |                                                                                          |      |       |          |
|------------|------------------------------------------------------------------------------------------|------|-------|----------|
| MSMEG_6046 | cation ABC transporter, ATP-binding protein, putative                                    | NA   | 1.134 | 5.06E-01 |
| MSMEG_6047 | cation ABC transporter, periplasmic cation-binding protein, putative                     | NA   | 1.101 | 1.16E-01 |
| MSMEG_6048 | cobalamin synthesis protein/P47K                                                         | NA   | 1.779 | 4.56E-01 |
| MSMEG_6049 | secreted protein                                                                         | NA   | 0.891 | 9.78E-02 |
| MSMEG_6050 | solute-binding lipoprotein                                                               | NA   | 1.138 | 1.14E-01 |
| MSMEG_6051 | ABC transporter protein, integral membrane subunit; this gene contains a frame shift \   | NA   | 0.980 | 6.71E-01 |
| MSMEG_6051 | ABC transporter protein, integral membrane subunit; this gene contains a frame shift \   | NA   | 1.347 | 5.02E-03 |
| MSMEG_6052 | ABC transport protein, ATP-binding subunit                                               | NA   | 1.199 | 3.05E-01 |
| MSMEG_6053 | cob(II)yrinic acid a,c-diamide reductase                                                 | bluB | 0.929 | 4.49E-01 |
| MSMEG_6054 | LamB/YcsF                                                                                | NA   | 0.950 | 2.01E-01 |
| MSMEG_6055 | hypothetical protein                                                                     | NA   | 0.992 | 9.70E-01 |
| MSMEG_6056 | transposase; this gene contains a frame shift which is not the result of sequencing errc | NA   | 0.993 | 8.79E-01 |
| MSMEG_6056 | transposase; this gene contains a frame shift which is not the result of sequencing errc | NA   | 1.139 | 1.07E-01 |
| MSMEG_6057 | MspD protein                                                                             | NA   | 0.689 | 2.96E-02 |
| MSMEG_6058 | cadmium transporting P-type ATPase                                                       | NA   | 0.937 | 1.80E-01 |
| MSMEG_6059 | conserved hypothetical protein                                                           | NA   | 1.087 | 3.94E-01 |
| MSMEG_6060 | permease                                                                                 | NA   | 1.065 | 3.75E-01 |
| MSMEG_6061 | conserved hypothetical protein                                                           | NA   | 0.992 | 8.64E-01 |
| MSMEG_6062 | Fe uptake system permease                                                                | NA   | 1.031 | 7.80E-01 |
| MSMEG_6063 | Fe uptake system integral membrane protein                                               | NA   | 1.198 | 1.55E-01 |
| MSMEG_6064 | lipoprotein                                                                              | NA   | 0.946 | 3.60E-01 |
| MSMEG_6065 | ribosomal protein S18                                                                    | rpsR | 1.149 | 1.15E-01 |
| MSMEG_6066 | 30S ribosomal protein S14                                                                | NA   | 1.674 | 3.21E-01 |
| MSMEG_6067 | ribosomal protein L33                                                                    | rpmG | 1.717 | 2.43E-01 |
| MSMEG_6068 | ribosomal protein L28                                                                    | rpmB | 1.244 | 1.40E-01 |
| MSMEG_6069 | CobW/P47K C- domain protein                                                              | NA   | 1.548 | 1.72E-01 |
| MSMEG_6070 | ribosomal protein L31                                                                    | rpmE | 1.238 | 2.89E-01 |
| MSMEG_6071 | metallo-beta-lactamase superfamily protein                                               | NA   | 1.029 | 6.25E-01 |
| MSMEG_6072 | Citrate transporter                                                                      | NA   | 0.941 | 7.05E-01 |
| MSMEG_6073 | RNA methyltransferase, TrmH family protein, group 3                                      | NA   | 1.153 | 8.81E-02 |
| MSMEG_6074 | cysteinyI-tRNA synthetase                                                                | cysS | 1.051 | 3.96E-01 |

|            |                                                                                          |      |       |          |
|------------|------------------------------------------------------------------------------------------|------|-------|----------|
| MSMEG_6075 | 2C-methyl-D-erythritol 2,4-cyclodiphosphate synthase                                     | ispF | 0.844 | 6.60E-03 |
| MSMEG_6076 | 2-C-methyl-D-erythritol 4-phosphate cytidyltransferase                                   | ispD | 0.798 | 1.99E-02 |
| MSMEG_6077 | transcriptional regulator, CarD family protein                                           | NA   | 0.923 | 2.97E-01 |
| MSMEG_6078 | LpqE protein                                                                             | NA   | 0.901 | 2.69E-02 |
| MSMEG_6079 | DNA repair protein RadA                                                                  | radA | 1.784 | 1.95E-01 |
| MSMEG_6080 | conserved hypothetical protein                                                           | NA   | 1.055 | 4.48E-01 |
| MSMEG_6081 | conserved hypothetical protein                                                           | NA   | 0.908 | 8.42E-02 |
| MSMEG_6082 | carbonic anhydrase                                                                       | NA   | 0.916 | 9.15E-02 |
| MSMEG_6083 | base excision DNA repair protein, HhH-GPD family protein                                 | NA   | 1.098 | 7.49E-01 |
| MSMEG_6084 | AraC-family transcriptional regulator; this gene contains a frame shift which is not the | NA   | 1.007 | 9.33E-01 |
| MSMEG_6085 | hydrolase, alpha/beta hydrolase fold family protein                                      | NA   | 1.052 | 7.52E-01 |
| MSMEG_6086 | antibiotic biosynthesis monooxygenase domain protein                                     | NA   | 0.950 | 1.70E-01 |
| MSMEG_6087 | beta-lactamase                                                                           | NA   | 0.918 | 2.75E-03 |
| MSMEG_6088 | phosphoglycerate mutase                                                                  | NA   | 1.242 | 1.88E-01 |
| MSMEG_6089 | conserved hypothetical protein                                                           | NA   | 1.054 | 6.56E-01 |
| MSMEG_6090 | conserved hypothetical protein                                                           | NA   | 0.909 | 1.39E-01 |
| MSMEG_6091 | negative regulator of genetic competence ClpC/mecB                                       | NA   | 1.060 | 2.64E-01 |
| MSMEG_6092 | Lsr2 protein                                                                             | NA   | 1.205 | 3.25E-01 |
| MSMEG_6093 | hypothetical protein                                                                     | NA   | 2.118 | 3.57E-01 |
| MSMEG_6094 | lysyl-tRNA synthetase                                                                    | lysS | 1.137 | 4.34E-02 |
| MSMEG_6095 | D-amino acid deaminase                                                                   | NA   | 1.527 | 3.70E-01 |
| MSMEG_6096 | Bvg accessory factor family protein                                                      | NA   | 1.016 | 7.96E-01 |
| MSMEG_6097 | pantoate--beta-alanine ligase                                                            | panC | 0.996 | 9.31E-01 |
| MSMEG_6098 | chalcone/stilbene synthase family protein                                                | NA   | 1.072 | 3.40E-01 |
| MSMEG_6099 | probable conserved transmembrane protein rich in alanine                                 | NA   | 0.872 | 2.70E-03 |
| MSMEG_6100 | conserved hypothetical protein                                                           | NA   | 0.926 | 5.62E-01 |
| MSMEG_6101 | 2-amino-4-hydroxy-6- hydroxymethyldihydropteridine pyrophosphokinase                     | folK | 0.939 | 3.84E-01 |
| MSMEG_6102 | dihydroneopterin aldolase                                                                | folB | 1.011 | 8.86E-01 |
| MSMEG_6103 | dihydropteroate synthase                                                                 | folP | 1.046 | 6.19E-01 |
| MSMEG_6104 | GTP cyclohydrolase I                                                                     | folE | 0.986 | 4.68E-01 |
| MSMEG_6105 | cell division protein                                                                    | NA   | 0.982 | 9.23E-01 |

|            |                                                                      |      |       |          |
|------------|----------------------------------------------------------------------|------|-------|----------|
| MSMEG_6106 | epoxide hydrolase                                                    | NA   | 0.657 | 5.49E-03 |
| MSMEG_6107 | limonene 1,2-monooxygenase                                           | NA   | 0.678 | 2.70E-03 |
| MSMEG_6108 | zinc-binding dehydrogenase                                           | NA   | 0.951 | 5.37E-01 |
| MSMEG_6109 | LpqG protein                                                         | NA   | 1.054 | 4.37E-01 |
| MSMEG_6110 | hypoxanthine phosphoribosyltransferase                               | hpt  | 1.137 | 2.18E-01 |
| MSMEG_6111 | tRNA(Ile)-lysidine synthetase                                        | tilS | 0.949 | 4.27E-01 |
| MSMEG_6112 | conserved hypothetical protein                                       | NA   | 1.003 | 9.41E-01 |
| MSMEG_6113 | D-alanyl-D-alanine carboxypeptidase/D-alanyl-D-alanine-endopeptidase | dacB | 1.007 | 8.92E-01 |
| MSMEG_6114 | inorganic pyrophosphatase                                            | ppa  | 0.802 | 1.32E-02 |
| MSMEG_6115 | phosphoglycerate dehydrogenase                                       | NA   | 1.309 | 4.30E-01 |
| MSMEG_6116 | conserved hypothetical protein                                       | NA   | 1.111 | 1.76E-01 |
| MSMEG_6117 | glucarate dehydratase                                                | NA   | 1.095 | 3.28E-01 |
| MSMEG_6118 | IclR-family protein transcriptional regulator                        | NA   | 0.859 | 1.02E-01 |
| MSMEG_6119 | conserved hypothetical protein                                       | NA   | 0.961 | 6.15E-01 |
| MSMEG_6120 | peptide transport system ATP-binding protein                         | NA   | 1.301 | 4.53E-01 |
| MSMEG_6121 | dipeptide transport ATP-binding protein DppD                         | NA   | 0.986 | 9.36E-01 |
| MSMEG_6122 | ABC transporter, membrane spanning protein                           | NA   | 1.157 | 2.15E-01 |
| MSMEG_6123 | ABC transporter, membrane spanning protein                           | NA   | 0.958 | 4.07E-01 |
| MSMEG_6124 | putative ABC transporter periplasmic oligopeptide-binding protein    | NA   | 1.061 | 5.77E-01 |
| MSMEG_6125 | transcriptional regulatory protein                                   | NA   | 1.166 | 1.04E-01 |
| MSMEG_6126 | D-isomer specific 2-hydroxyacid dehydrogenase                        | NA   | 1.244 | 1.11E-01 |
| MSMEG_6127 | anti-anti-sigma factor                                               | NA   | 0.940 | 4.02E-01 |
| MSMEG_6128 | two-component system response regulator                              | NA   | 0.853 | 1.91E-01 |
| MSMEG_6129 | conserved hypothetical protein                                       | NA   | 0.800 | 1.01E-02 |
| MSMEG_6130 | two-component sensor protein                                         | NA   | 0.811 | 8.04E-02 |
| MSMEG_6131 | magnesium or manganese-dependent protein phosphatase                 | NA   | 1.031 | 6.52E-01 |
| MSMEG_6132 | glucarate dehydratase                                                | NA   | 0.904 | 6.65E-01 |
| MSMEG_6133 | 5-dehydro-4-deoxyglucarate dehydratase                               | NA   | 1.157 | 7.72E-01 |
| MSMEG_6134 | NADP-dependent fatty aldehyde dehydrogenase                          | NA   | 1.038 | 8.19E-01 |
| MSMEG_6135 | hypothetical protein                                                 | NA   | 1.337 | 1.88E-01 |
| MSMEG_6136 | membrane protein, TerC family protein                                | NA   | 0.965 | 3.08E-01 |

|            |                                                          |      |       |          |
|------------|----------------------------------------------------------|------|-------|----------|
| MSMEG_6137 | non-ribosomal peptide synthetase                         | NA   | 1.037 | 7.88E-01 |
| MSMEG_6138 | metallopeptidase                                         | NA   | 0.869 | 9.59E-02 |
| MSMEG_6139 | putative HTH-type transcriptional regulator              | NA   | 1.068 | 5.25E-01 |
| MSMEG_6140 | membrane protein                                         | NA   | 1.295 | 4.88E-01 |
| MSMEG_6141 | N-acyl-D-glutamate amidohydrolase                        | NA   | 1.168 | 9.43E-02 |
| MSMEG_6142 | nucleoside-diphosphate-sugar epimerase                   | NA   | 1.110 | 1.87E-01 |
| MSMEG_6143 | conserved hypothetical protein                           | NA   | 1.275 | 5.88E-02 |
| MSMEG_6144 | pe family protein                                        | NA   | 1.039 | 6.01E-01 |
| MSMEG_6145 | hypothetical protein                                     | NA   | 0.938 | 6.18E-01 |
| MSMEG_6146 | ISMsm3, transposase                                      | NA   | 0.883 | 4.23E-01 |
| MSMEG_6146 | ISMsm3, transposase                                      | NA   | 1.389 | 1.93E-01 |
| MSMEG_6147 | conserved hypothetical protein                           | NA   | 1.782 | 4.02E-01 |
| MSMEG_6150 | 4-carboxymuconolactone decarboxylase                     | NA   | 0.943 | 3.13E-01 |
| MSMEG_6151 | alpha/beta hydrolase fold-1                              | NA   | 1.041 | 7.86E-01 |
| MSMEG_6153 | DNA polymerase III subunit delta                         | NA   | 1.011 | 9.29E-01 |
| MSMEG_6154 | adenylate cyclase, family protein 3                      | NA   | 1.119 | 1.81E-01 |
| MSMEG_6157 | DNA topoisomerase I                                      | topA | 0.956 | 4.66E-01 |
| MSMEG_6158 | conserved hypothetical protein                           | NA   | 0.966 | 3.74E-01 |
| MSMEG_6159 | conserved domain protein                                 | NA   | 0.840 | 3.86E-01 |
| MSMEG_6160 | ATP-dependent rna helicase, dead/deah box family protein | NA   | 1.131 | 2.98E-01 |
| MSMEG_6163 | conserved hypothetical protein                           | NA   | 1.115 | 2.57E-01 |
| MSMEG_6164 | conserved hypothetical protein                           | NA   | 0.893 | 1.46E-02 |
| MSMEG_6165 | conserved hypothetical protein                           | NA   | 1.479 | 6.31E-03 |
| MSMEG_6166 | hypothetical protein                                     | NA   | 1.043 | 5.78E-01 |
| MSMEG_6167 | bacterial type II secretion system protein F domain      | NA   | 0.998 | 9.89E-01 |
| MSMEG_6168 | bacterial type II secretion system protein F domain      | NA   | 0.831 | 6.47E-02 |
| MSMEG_6169 | type II/IV secretion system protein                      | NA   | 1.069 | 9.69E-02 |
| MSMEG_6170 | hypothetical protein                                     | NA   | 1.725 | 1.81E-01 |
| MSMEG_6171 | conserved hypothetical protein                           | NA   | 1.627 | 3.72E-01 |
| MSMEG_6172 | hypothetical protein                                     | NA   | 1.710 | 3.41E-01 |
| MSMEG_6173 | morphological differentiation-associated protein         | NA   | 1.195 | 7.67E-02 |

|            |                                                              |     |       |          |
|------------|--------------------------------------------------------------|-----|-------|----------|
| MSMEG_6174 | transcriptional regulator, lclR family protein               | NA  | 1.498 | 6.36E-02 |
| MSMEG_6175 | 2-keto-3-deoxy-galactonokinase                               | NA  | 1.230 | 3.87E-02 |
| MSMEG_6176 | 2-dehydro-3-deoxy-6-phosphogalactonate aldolase              | NA  | 1.118 | 6.57E-01 |
| MSMEG_6177 | galactonate dehydratase                                      | NA  | 0.909 | 3.84E-01 |
| MSMEG_6178 | D-galactonate transporter                                    | NA  | 1.060 | 7.13E-01 |
| MSMEG_6179 | acetyl-coenzyme A synthetase                                 | NA  | 0.619 | 7.46E-03 |
| MSMEG_6180 | secreted protein                                             | NA  | 1.129 | 4.24E-05 |
| MSMEG_6181 | conserved hypothetical protein                               | NA  | 1.063 | 5.17E-01 |
| MSMEG_6182 | conserved hypothetical protein                               | NA  | 0.846 | 1.55E-02 |
| MSMEG_6183 | serine protease                                              | NA  | 1.008 | 8.82E-01 |
| MSMEG_6184 | hydrolase, alpha/beta fold family protein                    | NA  | 1.075 | 1.49E-01 |
| MSMEG_6185 | NTP pyrophosphohydrolase                                     | NA  | 0.924 | 3.75E-01 |
| MSMEG_6186 | conserved hypothetical protein                               | NA  | 0.882 | 1.19E-01 |
| MSMEG_6187 | endonuclease III                                             | nth | 0.936 | 5.72E-02 |
| MSMEG_6188 | conserved hypothetical protein                               | NA  | 0.981 | 7.61E-01 |
| MSMEG_6189 | transcriptional regulator, Crp/Fnr family protein            | NA  | 0.988 | 8.23E-01 |
| MSMEG_6190 | metallo-beta-lactamase family protein                        | NA  | 1.358 | 4.12E-01 |
| MSMEG_6191 | translation initiation inhibitor                             | NA  | 0.992 | 9.12E-01 |
| MSMEG_6192 | conserved hypothetical protein                               | NA  | 0.982 | 6.33E-01 |
| MSMEG_6193 | anion-transporting ATPase                                    | NA  | 0.938 | 1.51E-01 |
| MSMEG_6194 | beta-lactamase related protein                               | NA  | 0.975 | 8.35E-01 |
| MSMEG_6195 | ion-transporting ATPase                                      | NA  | 0.958 | 4.21E-01 |
| MSMEG_6196 | gaba permease                                                | NA  | 1.002 | 9.87E-01 |
| MSMEG_6197 | diaminopimelate decarboxylase                                | NA  | 0.816 | 1.38E-02 |
| MSMEG_6198 | DNA-binding protein, putative                                | NA  | 1.151 | 5.38E-01 |
| MSMEG_6199 | Transcription factor WhiB                                    | NA  | 0.687 | 4.19E-02 |
| MSMEG_6200 | hypothetical protein                                         | NA  | 1.032 | 8.65E-01 |
| MSMEG_6201 | Transglycosylase                                             | NA  | 1.065 | 4.49E-01 |
| MSMEG_6202 | secreted protein                                             | NA  | 1.172 | 6.78E-02 |
| MSMEG_6203 | cysteine synthase/cystathionine beta-synthase family protein | NA  | 1.400 | 1.24E-03 |
| MSMEG_6205 | hypothetical protein                                         | NA  | 1.093 | 1.50E-01 |

|            |                                                                         |      |       |          |
|------------|-------------------------------------------------------------------------|------|-------|----------|
| MSMEG_6206 | serine/threonine protein kinase PksC                                    | NA   | 1.059 | 6.27E-01 |
| MSMEG_6207 | conserved hypothetical protein                                          | NA   | 1.255 | 1.83E-01 |
| MSMEG_6208 | palmitoyl-CoA hydrolase                                                 | NA   | 1.206 | 1.66E-01 |
| MSMEG_6209 | conserved hypothetical protein                                          | NA   | 0.860 | 8.12E-02 |
| MSMEG_6210 | conserved hypothetical protein                                          | NA   | 1.025 | 8.15E-01 |
| MSMEG_6211 | hypothetical protein                                                    | NA   | 1.129 | 7.28E-01 |
| MSMEG_6212 | hemerythrin HHE cation binding domain subfamily protein, putative       | NA   | 1.334 | 5.61E-01 |
| MSMEG_6213 | Manganese containing catalase                                           | NA   | 1.018 | 9.52E-01 |
| MSMEG_6214 | GatB/Yqey domain protein                                                | NA   | 0.883 | 8.33E-02 |
| MSMEG_6215 | conserved hypothetical protein                                          | NA   | 0.928 | 1.15E-01 |
| MSMEG_6216 | integral membrane protein                                               | NA   | 0.940 | 5.87E-01 |
| MSMEG_6217 | integral membrane protein                                               | NA   | 0.818 | 1.65E-02 |
| MSMEG_6218 | secreted protein                                                        | NA   | 0.846 | 2.76E-01 |
| MSMEG_6219 | ATPase family protein associated with various cellular activities (AAA) | NA   | 0.761 | 1.24E-02 |
| MSMEG_6220 | lipoprotein                                                             | NA   | 0.898 | 3.80E-01 |
| MSMEG_6221 | integral membrane protein                                               | NA   | 1.086 | 7.84E-03 |
| MSMEG_6222 | integral membrane protein                                               | NA   | 1.098 | 1.64E-01 |
| MSMEG_6223 | TetR family protein transcriptional repressor LfrR                      | NA   | 1.060 | 1.60E-01 |
| MSMEG_6224 | Retinal pigment epithelial membrane protein                             | NA   | 0.579 | 1.29E-02 |
| MSMEG_6225 | proton antiporter efflux pump                                           | NA   | 1.531 | 1.53E-02 |
| MSMEG_6226 | transcriptional regulator, PadR family protein domain protein           | NA   | 0.911 | 2.63E-01 |
| MSMEG_6227 | transcriptional regulator, PadR family protein                          | NA   | 0.909 | 1.51E-02 |
| MSMEG_6228 | hypothetical protein                                                    | NA   | 1.129 | 6.21E-01 |
| MSMEG_6229 | glycerol kinase                                                         | glpK | 0.888 | 7.92E-02 |
| MSMEG_6230 | probable acyltransferase                                                | NA   | 1.154 | 4.15E-01 |
| MSMEG_6231 | conserved hypothetical protein                                          | NA   | 1.465 | 3.05E-01 |
| MSMEG_6232 | catalase KatA                                                           | katA | 1.735 | 4.34E-01 |
| MSMEG_6233 | conserved hypothetical protein                                          | NA   | 2.066 | 3.99E-01 |
| MSMEG_6234 | CBS domain pair protein                                                 | NA   | 0.964 | 5.66E-01 |
| MSMEG_6235 | thiopurine S-methyltransferase (tpmt) superfamily protein               | NA   | 0.916 | 2.17E-01 |
| MSMEG_6236 | two-component system, regulatory protein                                | NA   | 0.698 | 1.18E-01 |

|            |                                                           |      |       |          |
|------------|-----------------------------------------------------------|------|-------|----------|
| MSMEG_6237 | conserved hypothetical protein                            | NA   | 0.796 | 1.74E-01 |
| MSMEG_6238 | putative two-component system sensor kinase               | NA   | 0.589 | 3.49E-02 |
| MSMEG_6239 | 1,3-propanediol dehydrogenase                             | NA   | 0.565 | 1.44E-02 |
| MSMEG_6240 | conserved hypothetical protein                            | NA   | 0.695 | 1.84E-01 |
| MSMEG_6241 | ATPase associated with various cellular activities, AAA-5 | NA   | 0.578 | 1.15E-01 |
| MSMEG_6242 | alcohol dehydrogenase, iron-containing                    | NA   | 0.496 | 3.94E-02 |
| MSMEG_6243 | response regulator receiver domain protein                | NA   | 0.788 | 4.33E-02 |
| MSMEG_6244 | TetR-family protein transcriptional regulator             | NA   | 1.306 | 8.64E-02 |
| MSMEG_6245 | chloramphenicol resistance protein                        | NA   | 1.311 | 2.32E-01 |
| MSMEG_6246 | pyridoxal-phosphate-dependent transferase                 | NA   | 1.144 | 3.15E-01 |
| MSMEG_6247 | conserved hypothetical protein                            | NA   | 1.173 | 1.03E-01 |
| MSMEG_6248 | conserved hypothetical protein                            | NA   | 1.437 | 4.34E-02 |
| MSMEG_6249 | conserved hypothetical protein                            | NA   | 1.367 | 1.41E-02 |
| MSMEG_6250 | glutamate--cysteine ligase                                | NA   | 1.197 | 2.18E-02 |
| MSMEG_6251 | conserved hypothetical protein                            | NA   | 1.138 | 6.64E-02 |
| MSMEG_6252 | conserved hypothetical protein                            | NA   | 1.154 | 7.58E-02 |
| MSMEG_6253 | fur family protein transcriptional regulator              | NA   | 1.215 | 1.22E-01 |
| MSMEG_6254 | hypothetical protein                                      | NA   | 6.409 | 2.74E-01 |
| MSMEG_6255 | conserved hypothetical protein                            | NA   | 2.230 | 1.37E-02 |
| MSMEG_6256 | aspartate-semialdehyde dehydrogenase                      | asd  | 1.386 | 5.50E-02 |
| MSMEG_6257 | aspartate kinase, monofunctional class                    | NA   | 1.544 | 1.52E-02 |
| MSMEG_6258 | nitroreductase family protein                             | NA   | 0.911 | 2.57E-01 |
| MSMEG_6259 | ammonium transporter                                      | amt  | 1.005 | 9.68E-01 |
| MSMEG_6260 | glutamine synthetase, type III                            | glnT | 3.351 | 4.36E-01 |
| MSMEG_6261 | glutamine amidotransferase, class II                      | NA   | 1.099 | 5.44E-01 |
| MSMEG_6262 | FwdC/FmdC family protein                                  | NA   | 0.801 | 3.25E-02 |
| MSMEG_6263 | glutamate synthase family protein                         | NA   | 1.247 | 3.67E-01 |
| MSMEG_6264 | putative oxidoreductase                                   | NA   | 0.803 | 1.46E-01 |
| MSMEG_6265 | transcriptional regulator                                 | NA   | 0.931 | 4.82E-01 |
| MSMEG_6266 | thiocyanate hydrolase beta subunit                        | NA   | 0.872 | 1.43E-01 |
| MSMEG_6267 | thiocyanate hydrolase gamma subunit                       | NA   | 0.760 | 3.16E-03 |



|            |                                                      |      |       |          |
|------------|------------------------------------------------------|------|-------|----------|
| MSMEG_6268 | putative ScnB protein                                | NA   | 0.843 | 2.81E-01 |
| MSMEG_6269 | magnesium transporter                                | mgtE | 0.926 | 3.38E-01 |
| MSMEG_6270 | hypothetical protein                                 | NA   | 1.897 | 2.26E-01 |
| MSMEG_6271 | 2-isopropylmalate synthase                           | leuA | 1.146 | 4.03E-02 |
| MSMEG_6272 | NAD-glutamate dehydrogenase                          | NA   | 1.375 | 2.25E-02 |
| MSMEG_6273 | integral membrane protein                            | NA   | 1.648 | 3.11E-03 |
| MSMEG_6274 | conserved hypothetical protein                       | NA   | 1.150 | 3.23E-01 |
| MSMEG_6275 | DNA polymerase III subunit epsilon                   | NA   | 0.916 | 2.86E-01 |
| MSMEG_6276 | mur ligase family protein                            | NA   | 1.292 | 3.24E-02 |
| MSMEG_6277 | cobyric acid synthase                                | NA   | 1.181 | 4.89E-02 |
| MSMEG_6278 | metallo-beta-lactamase superfamily protein, putative | NA   | 0.966 | 6.83E-01 |
| MSMEG_6279 | recombination protein RecR                           | recR | 0.893 | 2.37E-01 |
| MSMEG_6280 | conserved hypothetical protein                       | NA   | 0.906 | 4.99E-02 |
| MSMEG_6281 | N-acetylmuramoyl-L-alanine amidase                   | NA   | 1.071 | 5.46E-01 |
| MSMEG_6282 | KanY protein                                         | NA   | 0.960 | 6.99E-02 |
| MSMEG_6283 | FAD binding domain protein                           | NA   | 0.950 | 2.10E-01 |
| MSMEG_6284 | cyclopropane-fatty-acyl-phospholipid synthase        | NA   | 0.995 | 8.50E-01 |
| MSMEG_6285 | DNA polymerase III gamma/tau subunit                 | NA   | 1.201 | 2.70E-02 |
| MSMEG_6286 | aspartate transaminase                               | NA   | 1.183 | 1.68E-02 |
| MSMEG_6288 | conserved hypothetical protein                       | NA   | 0.961 | 5.05E-01 |
| MSMEG_6289 | Trypsin                                              | NA   | 1.167 | 2.36E-01 |
| MSMEG_6290 | putative DNA-binding protein                         | NA   | 1.064 | 2.87E-02 |
| MSMEG_6291 | D-amino-acid dehydrogenase                           | NA   | 0.780 | 9.93E-02 |
| MSMEG_6292 | transcription elongation factor GreA                 | NA   | 0.675 | 1.78E-02 |
| MSMEG_6293 | transcriptional regulatory protein                   | NA   | 0.834 | 1.04E-01 |
| MSMEG_6294 | caib/baif family protein                             | NA   | 0.879 | 6.67E-01 |
| MSMEG_6295 | shikimate transporter                                | NA   | 0.691 | 1.59E-02 |
| MSMEG_6296 | 5-exo-alcohol dehydrogenase                          | NA   | 0.712 | 5.85E-03 |
| MSMEG_6297 | aldehyde dehydrogenase                               | NA   | 1.192 | 2.16E-01 |
| MSMEG_6298 | malyl-CoA lyase                                      | NA   | 1.713 | 3.96E-01 |
| MSMEG_6299 | glyoxylate reductase                                 | NA   | 0.889 | 2.85E-01 |

|            |                                                                                   |      |       |          |
|------------|-----------------------------------------------------------------------------------|------|-------|----------|
| MSMEG_6300 | transcriptional regulator, GntR family protein                                    | NA   | 0.926 | 2.50E-01 |
| MSMEG_6301 | DNA polymerase LigD, polymerase domain                                            | ligD | 0.899 | 1.55E-01 |
| MSMEG_6302 | DNA ligase                                                                        | NA   | 0.905 | 2.53E-01 |
| MSMEG_6303 | para-nitrobenzyl esterase                                                         | NA   | 0.950 | 7.54E-01 |
| MSMEG_6304 | DNA ligase                                                                        | NA   | 1.236 | 5.38E-01 |
| MSMEG_6305 | conserved hypothetical protein                                                    | NA   | 1.013 | 9.67E-01 |
| MSMEG_6306 | glutamyl-tRNA synthetase                                                          | gltX | 0.992 | 9.53E-01 |
| MSMEG_6307 | glutamine-binding periplasmic protein/glutamine transport system permease protein | NA   | 0.808 | 4.51E-03 |
| MSMEG_6308 | hypothetical protein                                                              | NA   | 1.146 | 5.19E-02 |
| MSMEG_6309 | ABC transporter, ATP-binding protein                                              | NA   | 0.790 | 2.49E-02 |
| MSMEG_6310 | 4-hydroxybutyrate coenzyme A transferase                                          | NA   | 1.085 | 4.00E-01 |
| MSMEG_6311 | saccharopine dehydrogenase                                                        | lys1 | 1.207 | 2.14E-02 |
| MSMEG_6312 | cytochrome P450 107B1                                                             | NA   | 0.921 | 4.12E-01 |
| MSMEG_6313 | queuine tRNA-ribosyltransferase                                                   | tgt  | 1.107 | 3.04E-01 |
| MSMEG_6314 | haloalkane dehalogenase 1                                                         | NA   | 1.149 | 4.40E-01 |
| MSMEG_6315 | lipoprotein LpqH                                                                  | NA   | 1.154 | 8.87E-02 |
| MSMEG_6316 | lipoprotein LpqH                                                                  | NA   | 1.361 | 1.12E-02 |
| MSMEG_6317 | lipolytic enzyme, G-D-S-L                                                         | NA   | 0.834 | 3.30E-01 |
| MSMEG_6318 | putative diol dehydratase reactivation protein                                    | NA   | 1.415 | 1.51E-01 |
| MSMEG_6319 | penicillin-binding protein, transpeptidase                                        | NA   | 0.876 | 3.31E-01 |
| MSMEG_6320 | diol dehydrase gamma subunit                                                      | NA   | 1.238 | 1.93E-02 |
| MSMEG_6321 | glycerol dehydratase large subunit                                                | NA   | 1.230 | 4.99E-02 |
| MSMEG_6322 | bifunctional wax ester synthase/acyl-CoA diacylglycerol acyltransferase           | NA   | 1.039 | 8.79E-01 |
| MSMEG_6323 | hypothetical protein                                                              | NA   | 0.989 | 9.57E-01 |
| MSMEG_6324 | peroxidase                                                                        | NA   | 1.327 | 1.62E-01 |
| MSMEG_6325 | conserved hypothetical protein                                                    | NA   | 1.356 | 4.83E-01 |
| MSMEG_6327 | cytidine and deoxycytidylate deaminase family protein                             | NA   | 1.014 | 8.46E-01 |
| MSMEG_6328 | conserved hypothetical protein                                                    | NA   | 1.156 | 4.11E-01 |
| MSMEG_6329 | conserved hypothetical protein                                                    | NA   | 1.137 | 1.20E-01 |
| MSMEG_6330 | prephenate dehydrogenase                                                          | NA   | 1.286 | 1.40E-01 |
| MSMEG_6331 | ABC transporter, permease protein ProZ                                            | NA   | 2.422 | 3.89E-01 |

|            |                                                                                          |      |       |          |
|------------|------------------------------------------------------------------------------------------|------|-------|----------|
| MSMEG_6332 | amino acid ABC transporter, permease protein                                             | NA   | 1.039 | 7.24E-01 |
| MSMEG_6333 | amino acid ABC transporter, ATP-binding protein                                          | NA   | 1.161 | 2.46E-01 |
| MSMEG_6334 | ABC transporter, quaternary amine uptake transporter (QAT) family protein, substrate     | NA   | 1.466 | 9.86E-02 |
| MSMEG_6335 | hypothetical protein                                                                     | NA   | 1.199 | 1.35E-01 |
| MSMEG_6336 | conserved hypothetical protein                                                           | NA   | 0.803 | 4.72E-03 |
| MSMEG_6337 | Phosphotransferase enzyme family protein                                                 | NA   | 1.079 | 4.14E-01 |
| MSMEG_6338 | phosphoglycerate mutase family protein, putative                                         | NA   | 1.302 | 1.09E-01 |
| MSMEG_6339 | metallo-beta-lactamase family protein                                                    | NA   | 1.095 | 3.19E-01 |
| MSMEG_6340 | short-chain dehydrogenase/reductase SDR                                                  | NA   | 0.926 | 1.52E-01 |
| MSMEG_6341 | 6-phosphogluconate dehydrogenase, NAD-binding                                            | NA   | 0.827 | 3.10E-01 |
| MSMEG_6342 | oxidoreductase                                                                           | NA   | 0.718 | 3.90E-02 |
| MSMEG_6343 | conserved hypothetical protein                                                           | NA   | 0.899 | 6.41E-02 |
| MSMEG_6344 | transcriptional regulator                                                                | NA   | 1.205 | 2.35E-01 |
| MSMEG_6345 | conserved hypothetical protein                                                           | NA   | 1.116 | 3.80E-01 |
| MSMEG_6346 | hypothetical protein                                                                     | NA   | 1.181 | 6.78E-02 |
| MSMEG_6347 | hypothetical protein                                                                     | NA   | 1.114 | 1.84E-01 |
| MSMEG_6348 | hypothetical protein                                                                     | NA   | 0.987 | 9.22E-01 |
| MSMEG_6351 | histidinol-phosphate aminotransferase                                                    | hisC | 0.918 | 7.03E-02 |
| MSMEG_6352 | conserved hypothetical protein                                                           | NA   | 0.868 | 6.04E-04 |
| MSMEG_6353 | delta3,5-delta2,4-dienoyl-CoA isomerase                                                  | NA   | 0.978 | 7.60E-01 |
| MSMEG_6354 | serine esterase, cutinase family protein                                                 | NA   | 1.080 | 6.50E-01 |
| MSMEG_6355 | hypothetical protein                                                                     | NA   | 1.048 | 8.64E-01 |
| MSMEG_6356 | probable transcriptional regulator, AraC family protein, putative                        | NA   | 0.902 | 2.37E-01 |
| MSMEG_6357 | hypothetical protein                                                                     | NA   | 1.137 | 4.61E-01 |
| MSMEG_6358 | mesocentin                                                                               | NA   | 0.967 | 5.18E-01 |
| MSMEG_6359 | trypsin domain protein                                                                   | NA   | 1.006 | 9.54E-01 |
| MSMEG_6361 | transcriptional regulator, MarR family protein                                           | NA   | 1.317 | 1.66E-01 |
| MSMEG_6362 | quinone oxidoreductase                                                                   | NA   | 1.247 | 2.72E-03 |
| MSMEG_6363 | cysteine desulfurase family protein                                                      | NA   | 1.368 | 4.16E-02 |
| MSMEG_6364 | conserved hypothetical protein; this gene contains a frame shift which is not the result | NA   | 0.916 | 2.65E-01 |
| MSMEG_6365 | conserved hypothetical protein                                                           | NA   | 0.852 | 1.02E-02 |

|            |                                               |      |       |          |
|------------|-----------------------------------------------|------|-------|----------|
| MSMEG_6366 | O-antigen export system, ATP-binding protein  | NA   | 0.925 | 1.39E-01 |
| MSMEG_6367 | glycosyl transferase, group 2 family protein  | NA   | 0.952 | 4.97E-01 |
| MSMEG_6368 | DNA-binding protein                           | NA   | 1.087 | 4.88E-01 |
| MSMEG_6368 | DNA-binding protein                           | NA   | 1.522 | 1.69E-01 |
| MSMEG_6369 | O-antigen export system, permease protein     | NA   | 0.870 | 3.70E-02 |
| MSMEG_6370 | 4-carboxymuconolactone decarboxylase          | pcaC | 1.252 | 1.67E-01 |
| MSMEG_6371 | GntR-family protein regulator                 | NA   | 1.734 | 3.25E-01 |
| MSMEG_6372 | membrane protein                              | NA   | 1.139 | 5.26E-02 |
| MSMEG_6373 | conserved hypothetical protein                | NA   | 1.273 | 2.24E-01 |
| MSMEG_6374 | 2-dehydropantoate 2-reductase                 | panE | 1.289 | 2.02E-01 |
| MSMEG_6375 | transporter, major facilitator family protein | NA   | 1.336 | 2.64E-01 |
| MSMEG_6376 | transcriptional regulator LacI family protein | NA   | 1.344 | 2.93E-01 |
| MSMEG_6377 | hypothetical protein                          | NA   | 1.063 | 5.52E-01 |
| MSMEG_6378 | senescence marker protein-30                  | NA   | 0.950 | 6.45E-01 |
| MSMEG_6379 | transporter, major facilitator family protein | NA   | 0.964 | 7.05E-01 |
| MSMEG_6380 | hypothetical protein                          | NA   | 0.816 | 5.45E-02 |
| MSMEG_6381 | conserved hypothetical protein                | NA   | 0.831 | 3.00E-01 |
| MSMEG_6382 | oxidoreductase, FAD-binding                   | NA   | 0.872 | 1.33E-03 |
| MSMEG_6383 | transcription regulator FurA                  | NA   | 0.781 | 1.47E-01 |
| MSMEG_6384 | catalase/peroxidase HPI                       | katG | 0.623 | 9.87E-05 |
| MSMEG_6385 | hypothetical oxidoreductase in MprA 5'region  | NA   | 0.976 | 6.72E-01 |
| MSMEG_6386 | membrane protein                              | NA   | 0.883 | 6.97E-03 |
| MSMEG_6387 | probable arabinosyltransferase A              | NA   | 0.981 | 6.90E-01 |
| MSMEG_6388 | probable arabinosyltransferase B              | NA   | 1.024 | 7.87E-01 |
| MSMEG_6389 | probable arabinosyltransferase A              | NA   | 0.931 | 4.02E-01 |
| MSMEG_6390 | transporter, major facilitator family protein | NA   | 1.266 | 6.49E-03 |
| MSMEG_6391 | propionyl-CoA carboxylase beta chain          | NA   | 0.802 | 1.21E-02 |
| MSMEG_6392 | polyketide synthase                           | NA   | 0.803 | 2.17E-02 |
| MSMEG_6393 | acyl-CoA synthase                             | NA   | 1.018 | 7.09E-01 |
| MSMEG_6394 | conserved hypothetical protein                | NA   | 1.027 | 6.18E-01 |
| MSMEG_6395 | conserved hypothetical protein                | NA   | 1.172 | 1.15E-01 |

|            |                                                            |      |       |          |
|------------|------------------------------------------------------------|------|-------|----------|
| MSMEG_6396 | antigen 85-C                                               | NA   | 1.216 | 6.94E-02 |
| MSMEG_6397 | hypothetical protein                                       | NA   | 1.595 | 7.79E-02 |
| MSMEG_6398 | antigen 85-A                                               | NA   | 1.121 | 2.81E-01 |
| MSMEG_6399 | antigen 85-C                                               | NA   | 1.216 | 3.36E-02 |
| MSMEG_6400 | probable conserved transmembrane protein                   | NA   | 0.853 | 9.77E-03 |
| MSMEG_6401 | prenyltransferase, UbiA family protein                     | NA   | 0.927 | 2.33E-01 |
| MSMEG_6402 | PAP2 superfamily protein                                   | NA   | 0.951 | 8.16E-02 |
| MSMEG_6403 | bifunctional udp-galactofuranosyl transferase glft         | NA   | 0.915 | 7.49E-02 |
| MSMEG_6404 | UDP-galactopyranose mutase                                 | glf  | 0.677 | 2.63E-03 |
| MSMEG_6405 | Erp protein                                                | NA   | 0.819 | 4.08E-02 |
| MSMEG_6406 | N-acetylmuramoyl-L-alanine amidase                         | NA   | 0.889 | 2.17E-01 |
| MSMEG_6407 | Cof-like hydrolase                                         | NA   | 0.988 | 8.64E-01 |
| MSMEG_6408 | acyltransferase family protein                             | NA   | 1.004 | 9.43E-01 |
| MSMEG_6409 | acyltransferase family protein                             | NA   | 0.962 | 4.71E-01 |
| MSMEG_6410 | Rieske 2Fe-2S family protein                               | NA   | 1.040 | 3.43E-01 |
| MSMEG_6411 | conserved hypothetical protein                             | NA   | 1.271 | 3.45E-02 |
| MSMEG_6412 | conserved hypothetical protein                             | NA   | 0.992 | 8.70E-01 |
| MSMEG_6413 | seryl-tRNA synthetase                                      | serS | 1.189 | 1.07E-01 |
| MSMEG_6414 | conserved hypothetical protein                             | NA   | 1.107 | 1.13E-02 |
| MSMEG_6415 | conserved hypothetical protein                             | NA   | 1.331 | 2.67E-02 |
| MSMEG_6416 | phosphoglycerate mutase family protein                     | NA   | 0.934 | 5.52E-01 |
| MSMEG_6417 | conserved hypothetical protein                             | NA   | 1.126 | 8.63E-02 |
| MSMEG_6418 | prephenate dehydratase                                     | NA   | 0.925 | 2.08E-01 |
| MSMEG_6419 | conserved hypothetical protein                             | NA   | 1.729 | 1.40E-01 |
| MSMEG_6420 | abortive infection protein                                 | NA   | 1.030 | 7.67E-01 |
| MSMEG_6421 | transcriptional regulator                                  | NA   | 1.173 | 2.04E-01 |
| MSMEG_6422 | ferritin family protein                                    | NA   | 1.122 | 1.91E-02 |
| MSMEG_6423 | Glycerophosphoryl diester phosphodiesterase family protein | NA   | 0.988 | 7.77E-01 |
| MSMEG_6424 | probable conserved transmembrane protein                   | NA   | 0.901 | 2.17E-01 |
| MSMEG_6425 | rhodanese-like domain protein                              | NA   | 1.027 | 7.58E-01 |
| MSMEG_6426 | conserved hypothetical protein                             | NA   | 0.547 | 1.57E-03 |

|            |                                                       |      |       |          |
|------------|-------------------------------------------------------|------|-------|----------|
| MSMEG_6427 | [Mn] superoxide dismutase                             | NA   | 0.679 | 1.53E-03 |
| MSMEG_6428 | conserved hypothetical protein                        | NA   | 1.048 | 7.66E-01 |
| MSMEG_6429 | hypothetical protein                                  | NA   | 0.951 | 7.28E-01 |
| MSMEG_6430 | hypothetical protein                                  | NA   | 1.073 | 5.61E-01 |
| MSMEG_6431 | conserved hypothetical protein                        | NA   | 1.042 | 6.08E-01 |
| MSMEG_6432 | conserved hypothetical protein                        | NA   | 0.965 | 3.93E-01 |
| MSMEG_6433 | hypothetical protein                                  | NA   | 0.936 | 4.80E-01 |
| MSMEG_6434 | conserved hypothetical protein                        | NA   | 0.972 | 6.42E-01 |
| MSMEG_6435 | hypothetical protein                                  | NA   | 0.906 | 7.49E-02 |
| MSMEG_6436 | copper resistance protein CopC                        | NA   | 0.859 | 1.10E-01 |
| MSMEG_6437 | copper resistance protein D                           | NA   | 0.947 | 7.22E-01 |
| MSMEG_6438 | hypothetical protein                                  | NA   | 1.100 | 9.21E-02 |
| MSMEG_6439 | regulator of ribonuclease activity A                  | NA   | 1.061 | 2.37E-01 |
| MSMEG_6440 | monooxygenase, flavin-binding family protein          | NA   | 1.109 | 2.02E-01 |
| MSMEG_6441 | transcriptional regulator, TetR family protein        | NA   | 1.132 | 2.42E-02 |
| MSMEG_6442 | integral membrane protein                             | NA   | 0.999 | 9.92E-01 |
| MSMEG_6443 | DNA polymerase IV                                     | dinP | 1.073 | 4.96E-01 |
| MSMEG_6444 | YiaAB two helix domain protein                        | NA   | 1.030 | 8.51E-01 |
| MSMEG_6445 | PHP domain protein                                    | NA   | 1.368 | 3.28E-01 |
| MSMEG_6446 | hypothetical protein                                  | NA   | 0.998 | 9.83E-01 |
| MSMEG_6447 | hypothetical protein                                  | NA   | 0.926 | 3.94E-01 |
| MSMEG_6448 | hypothetical protein                                  | NA   | 1.894 | 1.28E-01 |
| MSMEG_6449 | conserved hypothetical protein                        | NA   | 0.944 | 5.61E-01 |
| MSMEG_6450 | hypothetical protein                                  | NA   | 0.942 | 2.98E-01 |
| MSMEG_6451 | transcriptional regulator, ArsR family protein        | NA   | 1.456 | 1.21E-01 |
| MSMEG_6452 | [NADP+] succinate-semialdehyde dehydrogenase          | NA   | 1.046 | 6.84E-01 |
| MSMEG_6453 | sulfate permease                                      | NA   | 1.550 | 2.79E-01 |
| MSMEG_6454 | conserved hypothetical protein                        | NA   | 1.458 | 5.46E-02 |
| MSMEG_6455 | conserved hypothetical protein                        | NA   | 1.155 | 3.17E-01 |
| MSMEG_6456 | conserved hypothetical protein                        | NA   | 1.117 | 4.32E-01 |
| MSMEG_6457 | oxidoreductase molybdopterin binding domain, putative | NA   | 1.027 | 8.75E-01 |

|            |                                                                    |      |       |          |
|------------|--------------------------------------------------------------------|------|-------|----------|
| MSMEG_6458 | glutamate synthase, small subunit                                  | NA   | 0.844 | 1.53E-02 |
| MSMEG_6459 | ferredoxin-dependent glutamate synthase 1                          | NA   | 0.778 | 2.01E-02 |
| MSMEG_6460 | hypothetical protein                                               | NA   | 1.106 | 5.29E-01 |
| MSMEG_6461 | hypothetical protein                                               | NA   | 3.147 | 4.03E-01 |
| MSMEG_6464 | conserved hypothetical protein                                     | NA   | 1.174 | 1.53E-01 |
| MSMEG_6465 | chloride channel                                                   | NA   | 1.074 | 5.74E-01 |
| MSMEG_6466 | aquaporin Z                                                        | NA   | 1.042 | 1.70E-01 |
| MSMEG_6467 | starvation-induced DNA protecting protein                          | NA   | 1.095 | 7.91E-01 |
| MSMEG_6468 | conserved hypothetical protein                                     | NA   | 1.337 | 3.86E-01 |
| MSMEG_6469 | conserved hypothetical protein                                     | NA   | 1.072 | 2.94E-01 |
| MSMEG_6470 | hypothetical protein                                               | NA   | 1.906 | 1.50E-01 |
| MSMEG_6471 | glycine/D-amino acid oxidase                                       | NA   | 1.047 | 4.40E-01 |
| MSMEG_6472 | hypothetical protein                                               | NA   | 1.729 | 8.87E-02 |
| MSMEG_6473 | tetracenomycin polyketide synthesis O-methyltransferase TcmP       | NA   | 0.958 | 7.95E-01 |
| MSMEG_6474 | nucleoside-diphosphate-sugar epimerase                             | NA   | 1.275 | 9.15E-02 |
| MSMEG_6475 | conserved hypothetical protein                                     | NA   | 0.872 | 3.98E-02 |
| MSMEG_6476 | conserved hypothetical protein                                     | NA   | 0.980 | 7.63E-01 |
| MSMEG_6477 | methionine-S-sulfoxide reductase                                   | msrA | 0.943 | 2.85E-01 |
| MSMEG_6478 | putative cytochrome P450 135B1                                     | NA   | 1.048 | 6.10E-01 |
| MSMEG_6479 | putative transcriptional regulator                                 | NA   | 1.071 | 6.54E-01 |
| MSMEG_6480 | putative transcriptional regulatory protein                        | NA   | 1.038 | 2.59E-01 |
| MSMEG_6481 | conserved hypothetical protein                                     | NA   | 1.139 | 1.06E-01 |
| MSMEG_6482 | secreted protein                                                   | NA   | 1.105 | 3.13E-01 |
| MSMEG_6483 | methyltransferase type 11                                          | NA   | 0.908 | 2.15E-01 |
| MSMEG_6484 | glycosyl transferase                                               | NA   | 1.013 | 6.94E-01 |
| MSMEG_6485 | ATP binding protein                                                | NA   | 1.035 | 8.30E-01 |
| MSMEG_6486 | oxidoreductase, FAD/FMN-binding                                    | NA   | 0.859 | 1.70E-01 |
| MSMEG_6487 | 2-hydroxy-3-carboxy-6-oxo-7-methylocta-2, 4-dienoate decarboxylase | NA   | 0.984 | 9.20E-01 |
| MSMEG_6488 | conserved hypothetical protein                                     | NA   | 0.811 | 4.54E-02 |
| MSMEG_6489 | 2,6-dihydropyridine hydroxylase                                    | NA   | 1.028 | 1.28E-01 |
| MSMEG_6490 | major facilitator superfamily protein                              | NA   | 1.250 | 4.84E-01 |

|            |                                                                                    |      |       |          |
|------------|------------------------------------------------------------------------------------|------|-------|----------|
| MSMEG_6491 | aldehyde dehydrogenase                                                             | NA   | 1.103 | 4.95E-01 |
| MSMEG_6492 | GAF domain protein, putative                                                       | NA   | 1.430 | 1.25E-01 |
| MSMEG_6493 | hypothetical protein                                                               | NA   | 3.467 | 2.53E-01 |
| MSMEG_6494 | ABC nitrate/sulfonate/bicarbonate family protein transporter, inner membrane subun | NA   | 1.070 | 1.88E-01 |
| MSMEG_6495 | ABC nitrate/sulfonate/bicarbonate family protein transporter, inner membrane subun | NA   | 0.913 | 2.46E-01 |
| MSMEG_6496 | nitrate/sulfonate/bicarbonate ABC transporter ATPase subunit                       | NA   | 0.863 | 1.79E-01 |
| MSMEG_6497 | hypothetical protein                                                               | NA   | 1.851 | 8.31E-02 |
| MSMEG_6498 | hypothetical protein                                                               | NA   | 1.850 | 4.88E-02 |
| MSMEG_6499 | conserved hypothetical protein                                                     | NA   | 1.006 | 9.16E-01 |
| MSMEG_6500 | conserved hypothetical protein                                                     | NA   | 1.154 | 4.33E-01 |
| MSMEG_6501 | hypothetical protein                                                               | NA   | 0.904 | 4.73E-01 |
| MSMEG_6502 | conserved hypothetical protein                                                     | NA   | 0.792 | 1.21E-02 |
| MSMEG_6503 | transcriptional regulator, TetR family protein                                     | NA   | 0.989 | 9.16E-01 |
| MSMEG_6504 | conserved hypothetical protein                                                     | NA   | 1.498 | 4.50E-01 |
| MSMEG_6505 | NfnB protein                                                                       | NA   | 1.785 | 2.42E-01 |
| MSMEG_6506 | nicotinamidase/pyrazinamidase                                                      | NA   | 1.090 | 1.15E-01 |
| MSMEG_6507 | glycogen debranching enzyme GlgX                                                   | glgX | 0.934 | 3.54E-01 |
| MSMEG_6508 | MarR-family protein transcriptional regulator                                      | NA   | 1.111 | 1.42E-01 |
| MSMEG_6509 | ABC-type drug export system, ATP-binding protein                                   | NA   | 2.519 | 3.64E-01 |
| MSMEG_6510 | ABC-type drug export system, membrane protein                                      | NA   | 1.248 | 3.80E-01 |
| MSMEG_6511 | acyl-CoA dehydrogenase domain protein                                              | NA   | 0.849 | 1.96E-01 |
| MSMEG_6512 | acyl-CoA dehydrogenase domain protein                                              | NA   | 0.860 | 1.44E-01 |
| MSMEG_6513 | membrane transport protein                                                         | NA   | 0.862 | 3.28E-02 |
| MSMEG_6514 | trehalose synthase-fused probable maltokinase                                      | NA   | 0.784 | 1.83E-02 |
| MSMEG_6515 | trehalose synthase                                                                 | treS | 0.769 | 8.25E-03 |
| MSMEG_6516 | hypothetical protein                                                               | NA   | 1.098 | 5.29E-01 |
| MSMEG_6517 | hypothetical protein                                                               | NA   | 1.057 | 6.96E-01 |
| MSMEG_6518 | conserved hypothetical protein                                                     | NA   | 0.874 | 9.54E-02 |
| MSMEG_6519 | pyridoxamine 5'-phosphate oxidase family protein                                   | NA   | 1.017 | 8.52E-01 |
| MSMEG_6520 | orotate phosphoribosyltransferase                                                  | NA   | 0.937 | 4.13E-01 |
| MSMEG_6521 | sulfate/thiosulfate import ATP-binding protein CysA 2                              | NA   | 0.895 | 2.06E-01 |



|            |                                                                                        |    |       |          |
|------------|----------------------------------------------------------------------------------------|----|-------|----------|
| MSMEG_6522 | ABC transporter, inner membrane subunit                                                | NA | 0.934 | 7.56E-01 |
| MSMEG_6523 | ABC transporter, membrane spanning protein                                             | NA | 0.810 | 2.10E-02 |
| MSMEG_6524 | ABC Polyamine/Opine/Phosphonate transporter, periplasmic ligand binding protein        | NA | 0.859 | 2.58E-02 |
| MSMEG_6525 | hypothetical protein                                                                   | NA | 1.160 | 3.24E-01 |
| MSMEG_6526 | pyridoxamine 5'-phosphate oxidase family protein                                       | NA | 1.185 | 5.53E-01 |
| MSMEG_6527 | transcriptional regulator, TetR family protein                                         | NA | 1.028 | 8.47E-01 |
| MSMEG_6528 | conserved hypothetical protein                                                         | NA | 0.826 | 2.67E-01 |
| MSMEG_6529 | conserved hypothetical protein                                                         | NA | 1.075 | 4.00E-01 |
| MSMEG_6530 | cytochrome c oxidase subunit III family protein                                        | NA | 0.773 | 8.56E-02 |
| MSMEG_6531 | conserved hypothetical protein                                                         | NA | 1.166 | 2.68E-01 |
| MSMEG_6532 | transcriptional regulatory protein                                                     | NA | 0.795 | 1.63E-01 |
| MSMEG_6533 | conserved hypothetical protein                                                         | NA | 1.854 | 2.26E-01 |
| MSMEG_6534 | hypothetical protein                                                                   | NA | 1.097 | 5.77E-01 |
| MSMEG_6535 | translation elongation factor EF-G                                                     | NA | 1.415 | 4.83E-01 |
| MSMEG_6536 | carboxymuconolactone decarboxylase                                                     | NA | 1.176 | 9.52E-02 |
| MSMEG_6537 | transcriptional regulator, TetR family protein                                         | NA | 1.548 | 2.90E-01 |
| MSMEG_6538 | 3-oxoacyl-(acyl-carrier-protein) reductase, putative                                   | NA | 1.165 | 2.16E-01 |
| MSMEG_6539 | conserved hypothetical protein                                                         | NA | 0.953 | 6.61E-01 |
| MSMEG_6540 | virulence factor Mce family protein                                                    | NA | 0.820 | 3.10E-02 |
| MSMEG_6541 | anti-sigma factor antagonist                                                           | NA | 0.964 | 6.09E-01 |
| MSMEG_6542 | B12 binding domain protein                                                             | NA | 0.797 | 7.96E-02 |
| MSMEG_6543 | GAF domain protein; this gene contains a frame shift which is not the result of sequen | NA | 0.837 | 9.39E-03 |
| MSMEG_6543 | GAF domain protein; this gene contains a frame shift which is not the result of sequen | NA | 0.877 | 1.40E-02 |
| MSMEG_6544 | transport-associated, putative                                                         | NA | 0.834 | 6.48E-02 |
| MSMEG_6545 | phosphoglycerate mutase family protein                                                 | NA | 1.154 | 5.06E-01 |
| MSMEG_6546 | transcriptional regulatory protein                                                     | NA | 0.847 | 1.14E-01 |
| MSMEG_6547 | amidohydrolase 2                                                                       | NA | 0.992 | 9.08E-01 |
| MSMEG_6548 | Rieske iron-sulfur protein                                                             | NA | 0.929 | 7.18E-01 |
| MSMEG_6549 | conserved hypothetical protein                                                         | NA | 0.699 | 7.63E-03 |
| MSMEG_6550 | hypothetical protein                                                                   | NA | 0.481 | 4.34E-03 |
| MSMEG_6550 | hypothetical protein                                                                   | NA | 0.620 | 2.58E-03 |

|            |                                                                    |    |       |          |
|------------|--------------------------------------------------------------------|----|-------|----------|
| MSMEG_6551 | hypothetical protein                                               | NA | 0.625 | 4.67E-02 |
| MSMEG_6552 | conserved hypothetical protein                                     | NA | 1.233 | 1.49E-01 |
| MSMEG_6553 | ABC transporter ATP-binding protein                                | NA | 0.886 | 5.96E-01 |
| MSMEG_6554 | hypothetical ABC transporter ATP-binding protein                   | NA | 1.023 | 6.66E-01 |
| MSMEG_6555 | transcriptional regulator, TetR family protein, putative           | NA | 0.858 | 2.05E-01 |
| MSMEG_6556 | putative transcriptional regulator                                 | NA | 0.733 | 8.81E-04 |
| MSMEG_6557 | dehydrogenase                                                      | NA | 1.160 | 6.08E-02 |
| MSMEG_6558 | putative enoyl-CoA hydratase                                       | NA | 0.763 | 9.19E-04 |
| MSMEG_6559 | hypothetical protein                                               | NA | 1.151 | 2.33E-01 |
| MSMEG_6560 | acyl dehydratase                                                   | NA | 0.995 | 9.24E-01 |
| MSMEG_6561 | nonspecific lipid-transfer protein                                 | NA | 1.060 | 5.81E-01 |
| MSMEG_6562 | putative acyl-CoA dehydrogenase                                    | NA | 1.262 | 9.91E-02 |
| MSMEG_6563 | dihydrokaempferol 4-reductase                                      | NA | 1.116 | 5.19E-02 |
| MSMEG_6564 | transcriptional regulator, TetR family protein                     | NA | 2.212 | 3.11E-01 |
| MSMEG_6565 | conserved hypothetical protein                                     | NA | 1.151 | 1.97E-01 |
| MSMEG_6566 | hypothetical protein                                               | NA | 1.488 | 4.35E-02 |
| MSMEG_6567 | iron-dependent peroxidase                                          | NA | 0.904 | 3.67E-01 |
| MSMEG_6568 | regulatory protein, LuxR, putative                                 | NA | 1.118 | 7.58E-01 |
| MSMEG_6569 | conserved hypothetical protein                                     | NA | 0.894 | 1.00E-01 |
| MSMEG_6570 | integral membrane protein                                          | NA | 0.962 | 6.29E-01 |
| MSMEG_6571 | conserved hypothetical protein                                     | NA | 0.925 | 4.13E-02 |
| MSMEG_6572 | methyltransferase                                                  | NA | 1.164 | 4.71E-01 |
| MSMEG_6573 | conserved hypothetical protein                                     | NA | 0.951 | 5.48E-01 |
| MSMEG_6574 | conserved hypothetical protein                                     | NA | 0.911 | 1.03E-01 |
| MSMEG_6575 | beta-lactamase                                                     | NA | 1.000 | 9.99E-01 |
| MSMEG_6576 | pyridoxamine 5'-phosphate oxidase family protein                   | NA | 0.985 | 9.50E-01 |
| MSMEG_6577 | methylmalonyl-CoA carboxyltransferase 12S subunit                  | NA | 1.018 | 7.98E-01 |
| MSMEG_6578 | hypothetical protein                                               | NA | 1.088 | 2.68E-02 |
| MSMEG_6579 | conserved hypothetical protein                                     | NA | 1.043 | 8.83E-01 |
| MSMEG_6580 | transcriptional regulator family protein                           | NA | 0.975 | 6.91E-01 |
| MSMEG_6581 | oxidoreductase, short chain dehydrogenase/reductase family protein | NA | 0.921 | 3.96E-01 |

|            |                                                                                           |      |       |          |
|------------|-------------------------------------------------------------------------------------------|------|-------|----------|
| MSMEG_6582 | pyridine nucleotide-disulphide oxidoreductase domain protein                              | NA   | 1.267 | 4.47E-01 |
| MSMEG_6583 | antigen 85-C                                                                              | NA   | 0.887 | 1.87E-01 |
| MSMEG_6584 | acyl-CoA dehydrogenase                                                                    | NA   | 0.895 | 6.77E-01 |
| MSMEG_6585 | acyl-CoA dehydrogenase                                                                    | NA   | 0.667 | 1.42E-02 |
| MSMEG_6586 | alpha/beta hydrolase, putative                                                            | NA   | 0.845 | 2.41E-01 |
| MSMEG_6587 | ATP-dependent helicase HrpA                                                               | hrpA | 1.388 | 6.98E-02 |
| MSMEG_6588 | fumarylacetoacetate                                                                       | NA   | 0.719 | 3.30E-02 |
| MSMEG_6590 | conserved hypothetical protein                                                            | NA   | 0.844 | 9.52E-02 |
| MSMEG_6591 | aminotransferase, class V family protein                                                  | NA   | 1.139 | 3.29E-01 |
| MSMEG_6592 | short-chain dehydrogenase/reductase SDR                                                   | NA   | 0.791 | 1.08E-01 |
| MSMEG_6593 | ATP-binding protein                                                                       | NA   | 0.966 | 8.27E-01 |
| MSMEG_6594 | amino acid ABC transporter, permease protein, 3-TM region, His/Glu/Gln/Arg/opine          | NA   | 1.112 | 3.88E-01 |
| MSMEG_6595 | secreted protein                                                                          | NA   | 0.988 | 8.45E-01 |
| MSMEG_6596 | conserved hypothetical protein                                                            | NA   | 0.984 | 7.23E-01 |
| MSMEG_6597 | hydrolase of the alpha/beta superfamily protein                                           | NA   | 1.132 | 1.55E-01 |
| MSMEG_6598 | 6,7-dimethyl-8-ribityllumazine synthase                                                   | NA   | 0.981 | 7.00E-01 |
| MSMEG_6599 | regulatory protein, LuxR; this gene contains a frame shift which is not the result of seq | NA   | 0.830 | 2.24E-01 |
| MSMEG_6599 | regulatory protein, LuxR; this gene contains a frame shift which is not the result of seq | NA   | 1.998 | 3.80E-01 |
| MSMEG_6600 | transposase                                                                               | NA   | 1.053 | 8.41E-01 |
| MSMEG_6601 | hypothetical protein                                                                      | NA   | 0.946 | 3.16E-01 |
| MSMEG_6602 | oxidoreductase                                                                            | NA   | 0.744 | 3.50E-02 |
| MSMEG_6603 | NADH:flavin oxidoreductase/nadh oxidase                                                   | NA   | 0.808 | 2.92E-01 |
| MSMEG_6604 | transcriptional regulator, TetR family protein                                            | NA   | 1.021 | 8.06E-01 |
| MSMEG_6605 | transcriptional regulatory protein                                                        | NA   | 1.031 | 8.56E-01 |
| MSMEG_6606 | hypothetical protein                                                                      | NA   | 0.998 | 9.91E-01 |
| MSMEG_6607 | hypothetical protein                                                                      | NA   | 1.231 | 3.51E-01 |
| MSMEG_6608 | hypothetical protein                                                                      | NA   | 1.663 | 2.10E-01 |
| MSMEG_6609 | hypothetical protein                                                                      | NA   | 1.739 | 5.54E-02 |
| MSMEG_6610 | protein of unknown function DUF58, putative                                               | NA   | 1.517 | 3.54E-01 |
| MSMEG_6611 | hypothetical protein                                                                      | NA   | 2.226 | 3.39E-01 |
| MSMEG_6612 | ATPase, MoxR family protein                                                               | moxR | 1.467 | 5.21E-01 |

|            |                                                                                          |      |       |          |
|------------|------------------------------------------------------------------------------------------|------|-------|----------|
| MSMEG_6613 | conserved hypothetical protein                                                           | NA   | 0.984 | 9.35E-01 |
| MSMEG_6614 | integral membrane protein                                                                | NA   | 0.947 | 6.61E-01 |
| MSMEG_6615 | hypothetical protein                                                                     | NA   | 1.016 | 9.69E-01 |
| MSMEG_6616 | S-(hydroxymethyl)glutathione dehydrogenase                                               | NA   | 1.179 | 6.31E-01 |
| MSMEG_6617 | nudix hydrolase                                                                          | NA   | 0.968 | 5.98E-01 |
| MSMEG_6618 | DEAD/DEAH box helicase; this gene contains a frame shift which is not the result of sei  | NA   | 1.252 | 5.25E-01 |
| MSMEG_6619 | conserved hypothetical protein; this gene contains a frame shift which is not the result | NA   | 1.089 | 2.34E-01 |
| MSMEG_6620 | conserved hypothetical protein                                                           | NA   | 1.170 | 1.08E-01 |
| MSMEG_6621 | bacterial luciferase family protein                                                      | NA   | 1.043 | 8.73E-01 |
| MSMEG_6622 | cytochrome P450 monooxygenase                                                            | NA   | 1.196 | 3.99E-01 |
| MSMEG_6623 | dehydrogenase                                                                            | NA   | 1.236 | 1.62E-01 |
| MSMEG_6624 | conserved hypothetical protein                                                           | NA   | 1.149 | 5.60E-01 |
| MSMEG_6625 | glyoxalase family protein                                                                | NA   | 1.027 | 8.63E-01 |
| MSMEG_6626 | short-chain dehydrogenase/reductase SDR                                                  | NA   | 1.034 | 8.10E-01 |
| MSMEG_6627 | nitroreductase family protein                                                            | NA   | 0.687 | 7.28E-03 |
| MSMEG_6628 | transcriptional regulator, TetR family protein                                           | NA   | 0.867 | 7.09E-02 |
| MSMEG_6629 | malonate decarboxylase, epsilon subunit                                                  | mdcH | 0.934 | 4.36E-01 |
| MSMEG_6630 | glyoxalase family protein                                                                | NA   | 0.883 | 1.79E-01 |
| MSMEG_6631 | phosphoribosyl-dephospho-CoA transferase MdcG                                            | mdcG | 0.937 | 7.90E-01 |
| MSMEG_6632 | beta subunit of malonate decarboxylase                                                   | NA   | 0.949 | 1.03E-01 |
| MSMEG_6633 | malonate decarboxylase acyl carrier protein                                              | mdcC | 1.028 | 8.11E-01 |
| MSMEG_6634 | triphosphoribosyl-dephospho-CoA synthase MdcB                                            | mdcB | 0.798 | 3.01E-02 |
| MSMEG_6635 | alpha subunit of malonate decarboxylase                                                  | NA   | 1.122 | 2.35E-01 |
| MSMEG_6636 | [Mn] superoxide dismutase                                                                | NA   | 0.926 | 5.14E-01 |
| MSMEG_6637 | hypothetical protein                                                                     | NA   | 1.226 | 1.86E-01 |
| MSMEG_6638 | 5-methyltetrahydropteroyltriglutamate-- homocysteine S-methyltransferase                 | metE | 0.976 | 7.22E-01 |
| MSMEG_6639 | transcriptional regulator, GntR family protein, putative                                 | NA   | 1.029 | 5.47E-01 |
| MSMEG_6640 | hypothetical protein                                                                     | NA   | 1.336 | 5.71E-01 |
| MSMEG_6641 | nitrilotriacetate monooxygenase component A                                              | NA   | 1.694 | 2.86E-02 |
| MSMEG_6642 | caib/baif family protein                                                                 | NA   | 1.179 | 5.09E-01 |
| MSMEG_6643 | DNA-binding protein                                                                      | NA   | 0.989 | 6.21E-01 |

|            |                                                                                          |      |       |          |
|------------|------------------------------------------------------------------------------------------|------|-------|----------|
| MSMEG_6644 | malyl-CoA lyase                                                                          | NA   | 1.067 | 5.68E-01 |
| MSMEG_6645 | 2-methylcitrate dehydratase 2                                                            | NA   | 0.913 | 5.76E-01 |
| MSMEG_6646 | methylisocitrate lyase                                                                   | prpB | 1.856 | 2.22E-01 |
| MSMEG_6647 | citrate synthase 2                                                                       | NA   | 2.366 | 2.54E-01 |
| MSMEG_6648 | pyruvate carboxylase                                                                     | pyc  | 1.024 | 8.95E-01 |
| MSMEG_6649 | conserved hypothetical protein                                                           | NA   | 0.882 | 5.52E-01 |
| MSMEG_6650 | hypothetical protein                                                                     | NA   | 1.046 | 4.58E-01 |
| MSMEG_6651 | hypothetical protein                                                                     | NA   | 1.083 | 5.36E-01 |
| MSMEG_6652 | hypothetical protein                                                                     | NA   | 1.025 | 9.16E-01 |
| MSMEG_6653 | hypothetical protein; this gene contains a frame shift which is not the result of sequen | NA   | 0.882 | 4.85E-01 |
| MSMEG_6653 | hypothetical protein; this gene contains a frame shift which is not the result of sequen | NA   | 1.067 | 4.94E-01 |
| MSMEG_6654 | TnpC protein                                                                             | NA   | 0.891 | 5.17E-01 |
| MSMEG_6655 | conserved hypothetical protein                                                           | NA   | 0.882 | 4.07E-01 |
| MSMEG_6656 | conserved hypothetical protein                                                           | NA   | 0.635 | 9.45E-03 |
| MSMEG_6657 | alpha subunit of malonate decarboxylase                                                  | NA   | 1.287 | 4.21E-01 |
| MSMEG_6658 | alpha/beta hydrolase fold                                                                | NA   | 0.939 | 6.69E-01 |
| MSMEG_6659 | hypothetical protein                                                                     | NA   | 0.891 | 4.66E-01 |
| MSMEG_6660 | permease, cytosine/purines, uracil, thiamine, allantoin family protein                   | NA   | 0.942 | 9.65E-02 |
| MSMEG_6661 | O-methyltransferase, putative                                                            | NA   | 0.870 | 3.19E-02 |
| MSMEG_6662 | short chain dehydrogenase                                                                | NA   | 0.875 | 4.08E-01 |
| MSMEG_6663 | C5-O-methyltransferase                                                                   | NA   | 1.006 | 9.74E-01 |
| MSMEG_6664 | methylenetetrahydrofolate reductase family protein, putative                             | NA   | 0.877 | 4.89E-01 |
| MSMEG_6665 | integral membrane protein                                                                | NA   | 1.161 | 4.88E-01 |
| MSMEG_6666 | conserved hypothetical protein                                                           | NA   | 0.966 | 6.74E-01 |
| MSMEG_6667 | conserved hypothetical protein                                                           | NA   | 0.815 | 2.69E-01 |
| MSMEG_6668 | ABC transporter, periplasmic substrate-binding protein, putative                         | NA   | 1.459 | 1.81E-01 |
| MSMEG_6669 | ABC transporter, permease protein                                                        | NA   | 1.368 | 3.88E-01 |
| MSMEG_6670 | ABC transporter, permease protein, putative                                              | NA   | 0.967 | 8.01E-01 |
| MSMEG_6671 | sulfate/thiosulfate import ATP-binding protein CysA                                      | NA   | 1.127 | 3.35E-01 |
| MSMEG_6672 | type I phosphodiesterase                                                                 | NA   | 1.196 | 6.48E-02 |
| MSMEG_6673 | 6-aminohexanoate-cyclic-dimer hydrolase                                                  | NA   | 1.693 | 3.59E-01 |

|            |                                                                    |      |       |          |
|------------|--------------------------------------------------------------------|------|-------|----------|
| MSMEG_6674 | transcriptional regulator, LysR family protein                     | NA   | 1.205 | 5.40E-02 |
| MSMEG_6675 | hypothetical protein                                               | NA   | 2.469 | 2.01E-01 |
| MSMEG_6676 | probable conserved transmembrane protein                           | NA   | 1.216 | 9.54E-02 |
| MSMEG_6677 | transcriptional regulator, LysR family protein                     | NA   | 1.367 | 1.51E-01 |
| MSMEG_6678 | conserved hypothetical protein                                     | NA   | 1.037 | 6.86E-01 |
| MSMEG_6679 | metallo-beta-lactamase family protein                              | NA   | 1.034 | 7.84E-01 |
| MSMEG_6680 | integral membrane protein                                          | NA   | 1.128 | 1.67E-01 |
| MSMEG_6681 | hypothetical protein                                               | NA   | 0.794 | 1.99E-02 |
| MSMEG_6682 | RNA polymerase sigma-70 factor, putative                           | NA   | 1.164 | 4.17E-01 |
| MSMEG_6683 | probable peroxiredoxin, putative                                   | NA   | 0.914 | 4.18E-01 |
| MSMEG_6684 | agarase                                                            | NA   | 1.527 | 2.70E-01 |
| MSMEG_6685 | 4-aminobutyrate transaminase                                       | gabT | 0.662 | 5.96E-03 |
| MSMEG_6686 | glutaryl-CoA dehydrogenase                                         | NA   | 0.708 | 4.89E-02 |
| MSMEG_6687 | aldehyde dehydrogenase, thermostable                               | NA   | 0.916 | 6.58E-01 |
| MSMEG_6688 | regulatory protein                                                 | NA   | 1.271 | 4.39E-01 |
| MSMEG_6689 | CAIB/BAIF family protein                                           | NA   | 0.880 | 3.65E-01 |
| MSMEG_6690 | glutamine amidotransferase class-I                                 | NA   | 1.270 | 4.90E-02 |
| MSMEG_6691 | glutamine amidotransferase                                         | NA   | 1.257 | 4.44E-01 |
| MSMEG_6692 | putative glutamine-binding periplasmic protein                     | NA   | 1.144 | 6.25E-01 |
| MSMEG_6693 | glutamine synthetase III                                           | NA   | 1.344 | 6.72E-01 |
| MSMEG_6694 | conserved domain protein                                           | NA   | 0.819 | 1.46E-02 |
| MSMEG_6695 | cytochrome P450                                                    | NA   | 1.047 | 7.94E-01 |
| MSMEG_6696 | hypothetical protein                                               | NA   | 1.226 | 2.41E-01 |
| MSMEG_6699 | conserved hypothetical protein                                     | NA   | 0.959 | 6.84E-01 |
| MSMEG_6700 | regulatory protein                                                 | NA   | 1.015 | 8.09E-01 |
| MSMEG_6701 | amino acid permease                                                | NA   | 1.119 | 4.57E-01 |
| MSMEG_6702 | [NADP+] succinate-semialdehyde dehydrogenase                       | NA   | 1.196 | 3.56E-01 |
| MSMEG_6703 | N5,N10- methylenetetrahydromethanopterin reductase-related protein | NA   | 1.223 | 3.30E-01 |
| MSMEG_6704 | shikimate 5-dehydrogenase                                          | NA   | 1.001 | 9.97E-01 |
| MSMEG_6705 | regulatory protein                                                 | NA   | 0.882 | 1.28E-01 |
| MSMEG_6706 | hypothetical protein                                               | NA   | 1.201 | 4.27E-01 |

|            |                                               |    |       |          |
|------------|-----------------------------------------------|----|-------|----------|
| MSMEG_6707 | hypothetical protein                          | NA | 2.910 | 4.15E-01 |
| MSMEG_6708 | epoxide hydrolase                             | NA | 1.005 | 9.86E-01 |
| MSMEG_6709 | cyclopentanol dehydrogenase                   | NA | 1.129 | 6.13E-01 |
| MSMEG_6710 | hydrolase, alpha/beta fold family protein     | NA | 0.816 | 3.10E-01 |
| MSMEG_6711 | 4-hydroxybenzoate transporter                 | NA | 1.207 | 5.15E-01 |
| MSMEG_6712 | maleylacetate reductase                       | NA | 0.962 | 5.32E-01 |
| MSMEG_6713 | hydroxyquinol 1,2-dioxygenase                 | NA | 1.253 | 1.88E-01 |
| MSMEG_6714 | conserved hypothetical protein                | NA | 0.959 | 7.51E-01 |
| MSMEG_6715 | AP endonuclease, family protein 2             | NA | 0.842 | 1.65E-01 |
| MSMEG_6716 | AP endonuclease, family protein 2             | NA | 1.139 | 6.50E-01 |
| MSMEG_6717 | oxidoreductase, Gfo/Idh/MocA family protein   | NA | 1.815 | 4.72E-01 |
| MSMEG_6718 | transporter, major facilitator family protein | NA | 1.117 | 5.59E-01 |
| MSMEG_6719 | epoxide hydrolase                             | NA | 0.975 | 8.79E-01 |
| MSMEG_6720 | epoxide hydrolase                             | NA | 0.686 | 1.30E-02 |
| MSMEG_6721 | hypothetical protein                          | NA | 1.008 | 9.69E-01 |
| MSMEG_6722 | conserved hypothetical protein                | NA | 0.881 | 1.66E-01 |
| MSMEG_6723 | conserved hypothetical protein                | NA | 1.187 | 1.35E-01 |
| MSMEG_6724 | ABC-type cobalt transport system              | NA | 1.000 | 9.96E-01 |
| MSMEG_6725 | ABC transporter, ATP-binding protein          | NA | 1.021 | 7.75E-01 |
| MSMEG_6726 | ABC transporter, permease protein             | NA | 1.127 | 1.92E-01 |
| MSMEG_6727 | amino acid permease-associated region         | NA | 1.192 | 6.99E-01 |
| MSMEG_6728 | conserved hypothetical protein                | NA | 1.152 | 5.92E-01 |
| MSMEG_6729 | DNA-binding protein                           | NA | 0.970 | 7.01E-01 |
| MSMEG_6730 | putative oxidoreductase YdbC                  | NA | 1.123 | 3.29E-01 |
| MSMEG_6731 | transcriptional regulatory protein            | NA | 0.902 | 2.26E-01 |
| MSMEG_6732 | integral membrane protein                     | NA | 1.104 | 4.36E-01 |
| MSMEG_6733 | hydrolase, carbon-nitrogen family protein     | NA | 1.090 | 4.54E-01 |
| MSMEG_6734 | dibenzothiophene desulfurization enzyme A     | NA | 0.994 | 8.59E-01 |
| MSMEG_6735 | amino acid permease, putative                 | NA | 1.294 | 3.42E-01 |
| MSMEG_6736 | LacI-family protein transcriptional regulator | NA | 0.949 | 7.74E-01 |
| MSMEG_6737 | putative membrane protein                     | NA | 1.014 | 5.21E-01 |

|            |                                                                     |      |       |          |
|------------|---------------------------------------------------------------------|------|-------|----------|
| MSMEG_6738 | probable transcriptional regulator YdhC                             | NA   | 1.090 | 4.73E-03 |
| MSMEG_6739 | hypothetical protein                                                | NA   | 0.962 | 6.58E-01 |
| MSMEG_6740 | 1-aminocyclopropane-1-carboxylate deaminase                         | NA   | 1.050 | 3.49E-01 |
| MSMEG_6741 | antar domain protein                                                | NA   | 1.171 | 2.15E-01 |
| MSMEG_6742 | conserved hypothetical protein                                      | NA   | 1.493 | 3.65E-01 |
| MSMEG_6743 | lactoylglutathione lyase                                            | NA   | 1.401 | 3.87E-01 |
| MSMEG_6744 | oxidoreductase FAD/NAD                                              | NA   | 1.088 | 6.58E-01 |
| MSMEG_6745 | transcriptional regulator, GntR family protein                      | NA   | 1.115 | 1.70E-01 |
| MSMEG_6746 | oxidoreductase, aldo/keto reductase family protein                  | NA   | 0.859 | 5.35E-02 |
| MSMEG_6747 | oxidoreductase                                                      | NA   | 1.585 | 1.58E-01 |
| MSMEG_6748 | ATPase component of ABC transporters with duplicated ATPase domains | NA   | 1.080 | 1.90E-01 |
| MSMEG_6749 | conserved hypothetical protein                                      | NA   | 1.020 | 7.70E-01 |
| MSMEG_6750 | hypothetical protein                                                | NA   | 1.062 | 2.06E-01 |
| MSMEG_6751 | hypothetical protein                                                | NA   | 1.423 | 4.10E-01 |
| MSMEG_6752 | endoglucanase A                                                     | NA   | 0.956 | 4.06E-01 |
| MSMEG_6753 | oxidoreductase, short chain dehydrogenase/reductase family protein  | NA   | 3.936 | 1.18E-01 |
| MSMEG_6754 | MaoC like domain protein                                            | NA   | 0.998 | 9.58E-01 |
| MSMEG_6755 | isoflavone reductase                                                | NA   | 1.767 | 1.34E-02 |
| MSMEG_6756 | glycerol kinase                                                     | glpK | 0.843 | 1.88E-02 |
| MSMEG_6757 | glycerol operon regulatory protein                                  | NA   | 0.682 | 5.86E-04 |
| MSMEG_6758 | transport integral membrane protein                                 | NA   | 0.585 | 2.11E-04 |
| MSMEG_6759 | glycerol kinase                                                     | glpK | 0.476 | 8.11E-04 |
| MSMEG_6760 | conserved hypothetical protein                                      | NA   | 0.998 | 9.59E-01 |
| MSMEG_6761 | glycerol-3-phosphate dehydrogenase 2                                | NA   | 0.475 | 7.42E-04 |
| MSMEG_6762 | transcriptional regulator                                           | NA   | 1.128 | 3.27E-01 |
| MSMEG_6763 | oxidoreductase                                                      | NA   | 0.946 | 6.56E-01 |
| MSMEG_6764 | transcriptional regulator, TetR family protein                      | NA   | 1.016 | 8.06E-01 |
| MSMEG_6765 | ABC-2 type transporter superfamily protein                          | NA   | 1.369 | 2.11E-01 |
| MSMEG_6766 | ABC transporter, ATP-binding protein, NodI family protein           | NA   | 0.962 | 7.85E-01 |
| MSMEG_6767 | mycocerosic acid synthase                                           | NA   | 0.993 | 9.63E-01 |
| MSMEG_6768 | halogenase                                                          | NA   | 1.271 | 5.28E-01 |



|            |                                                                                         |      |       |          |
|------------|-----------------------------------------------------------------------------------------|------|-------|----------|
| MSMEG_6769 | transporter, monovalent cation:proton antiporter-2 (CPA2) family protein                | NA   | 1.191 | 5.39E-02 |
| MSMEG_6770 | conserved hypothetical protein                                                          | NA   | 1.019 | 9.09E-01 |
| MSMEG_6771 | conserved hypothetical protein                                                          | NA   | 0.891 | 2.40E-02 |
| MSMEG_6772 | homoserine O-acetyltransferase                                                          | NA   | 1.154 | 5.06E-01 |
| MSMEG_6773 | CaiB/BaiF family protein                                                                | NA   | 1.061 | 3.45E-01 |
| MSMEG_6774 | enoyl-CoA hydratase                                                                     | NA   | 1.167 | 1.50E-01 |
| MSMEG_6775 | major facilitator superfamily protein transporter                                       | NA   | 1.400 | 1.25E-01 |
| MSMEG_6776 | transcriptional regulator, LysR family protein                                          | NA   | 1.040 | 4.63E-01 |
| MSMEG_6777 | probable enoyl-CoA hydratase                                                            | NA   | 1.072 | 8.16E-01 |
| MSMEG_6778 | hypothetical protein                                                                    | NA   | 1.240 | 2.53E-02 |
| MSMEG_6779 | conserved hypothetical protein, putative                                                | NA   | 0.923 | 3.99E-01 |
| MSMEG_6780 | phenazine biosynthesis protein PhzF                                                     | NA   | 0.989 | 9.29E-01 |
| MSMEG_6781 | hypothetical protein                                                                    | NA   | 1.187 | 2.92E-01 |
| MSMEG_6782 | hypothetical protein                                                                    | NA   | 1.114 | 4.28E-01 |
| MSMEG_6783 | integral membrane protein                                                               | NA   | 0.769 | 7.36E-04 |
| MSMEG_6784 | beta-lactamase                                                                          | NA   | 0.925 | 5.33E-02 |
| MSMEG_6785 | triosephosphate isomerase                                                               | tpiA | 1.197 | 4.04E-01 |
| MSMEG_6786 | conserved hypothetical protein                                                          | NA   | 0.703 | 8.17E-02 |
| MSMEG_6787 | ribose 5-phosphate isomerase                                                            | NA   | 0.966 | 7.22E-01 |
| MSMEG_6788 | dihydroxyacetone kinase                                                                 | NA   | 0.847 | 2.00E-01 |
| MSMEG_6789 | transcriptional regulator, GntR family protein                                          | NA   | 1.062 | 1.54E-01 |
| MSMEG_6790 | AP endonuclease, family protein 2                                                       | NA   | 0.747 | 2.19E-01 |
| MSMEG_6791 | 3-hydroxybutyryl-CoA dehydrogenase                                                      | NA   | 0.760 | 2.75E-02 |
| MSMEG_6792 | inner membrane permease YgbN                                                            | NA   | 0.966 | 6.86E-01 |
| MSMEG_6793 | hypothetical protein                                                                    | NA   | 0.891 | 2.66E-01 |
| MSMEG_6794 | DNA-binding protein                                                                     | NA   | 1.333 | 4.14E-01 |
| MSMEG_6795 | enoyl-CoA hydratase/isomerase family protein                                            | NA   | 0.944 | 7.78E-01 |
| MSMEG_6796 | hypothetical protein                                                                    | NA   | 0.974 | 7.95E-01 |
| MSMEG_6797 | carboxymuconolactone decarboxylase                                                      | NA   | 1.077 | 3.20E-01 |
| MSMEG_6798 | ribose operon repressor                                                                 | rbsR | 1.003 | 9.63E-01 |
| MSMEG_6799 | aldo/keto reductase; this gene contains a frame shift which is not the result of sequen | NA   | 1.065 | 3.78E-01 |

|            |                                                                                            |      |       |          |
|------------|--------------------------------------------------------------------------------------------|------|-------|----------|
| MSMEG_6800 | phosphoribulokinase/uridine kinase                                                         | NA   | 0.927 | 4.68E-03 |
| MSMEG_6801 | kinase, pfkB family protein                                                                | NA   | 0.941 | 6.66E-01 |
| MSMEG_6802 | ABC transporter ATP-binding protein                                                        | NA   | 1.178 | 7.28E-01 |
| MSMEG_6803 | ribose transport system permease protein RbsC                                              | NA   | 0.710 | 4.11E-02 |
| MSMEG_6804 | sugar ABC transporter substrate-binding protein                                            | NA   | 0.688 | 5.03E-03 |
| MSMEG_6805 | beta-lactamase                                                                             | NA   | 1.189 | 2.09E-01 |
| MSMEG_6806 | excinuclease ABC, A subunit                                                                | uvrA | 1.423 | 2.39E-01 |
| MSMEG_6807 | transcriptional regulator, TetR family protein                                             | NA   | 1.464 | 1.93E-01 |
| MSMEG_6808 | hypothetical protein                                                                       | NA   | 1.006 | 9.69E-01 |
| MSMEG_6809 | CbbQ protein                                                                               | cbbQ | 1.600 | 3.79E-01 |
| MSMEG_6810 | nitric oxide reductase activase protein; this gene contains a frame shift which is not th  | NA   | 1.066 | 8.19E-01 |
| MSMEG_6811 | conserved hypothetical protein                                                             | NA   | 1.291 | 1.30E-02 |
| MSMEG_6812 | major facilitator superfamily; this gene contains a frame shift which is not the result of | NA   | 1.263 | 5.01E-02 |
| MSMEG_6813 | amidohydrolase 2                                                                           | NA   | 1.083 | 4.17E-01 |
| MSMEG_6814 | helix-turn-helix, Fis-type                                                                 | NA   | 1.619 | 3.45E-01 |
| MSMEG_6815 | secreted protein                                                                           | NA   | 1.078 | 3.71E-01 |
| MSMEG_6816 | molybdopterin oxidoreductase                                                               | NA   | 1.288 | 2.76E-01 |
| MSMEG_6817 | RNA polymerase sigma factor, sigma-70 family protein                                       | NA   | 7.587 | 4.02E-01 |
| MSMEG_6818 | dehydrogenase                                                                              | NA   | 1.035 | 8.35E-01 |
| MSMEG_6819 | conserved domain protein; this gene contains a frame shift which is not the result of s    | NA   | 1.401 | 4.52E-01 |
| MSMEG_6819 | conserved domain protein; this gene contains a frame shift which is not the result of s    | NA   | 2.453 | 2.42E-01 |
| MSMEG_6820 | acid phosphatase SurE                                                                      | surE | 1.096 | 5.95E-01 |
| MSMEG_6821 | NLP/P60 family protein                                                                     | NA   | 0.962 | 7.55E-01 |
| MSMEG_6822 | beta-lactamase                                                                             | NA   | 0.883 | 9.63E-02 |
| MSMEG_6823 | short-chain dehydrogenase/reductase SDR                                                    | NA   | 0.924 | 3.89E-02 |
| MSMEG_6824 | MarR-family protein regulatory protein                                                     | NA   | 1.071 | 3.70E-01 |
| MSMEG_6825 | caax amino protease family protein, putative                                               | NA   | 1.947 | 1.54E-01 |
| MSMEG_6826 | L-lactate permease                                                                         | NA   | 1.144 | 7.43E-01 |
| MSMEG_6827 | hypothetical protein                                                                       | NA   | 1.835 | 4.28E-01 |
| MSMEG_6828 | transcriptional regulator                                                                  | NA   | 1.695 | 2.55E-01 |
| MSMEG_6829 | transcriptional regulatory protein                                                         | NA   | 1.224 | 8.74E-02 |

|            |                                                     |    |       |          |
|------------|-----------------------------------------------------|----|-------|----------|
| MSMEG_6830 | conserved hypothetical protein                      | NA | 1.215 | 8.72E-02 |
| MSMEG_6831 | hydrolase, alpha/beta hydrolase fold family protein | NA | 1.544 | 2.32E-01 |
| MSMEG_6832 | conserved hypothetical protein                      | NA | 0.990 | 8.89E-01 |
| MSMEG_6833 | alcohol dehydrogenase                               | NA | 5.442 | 3.91E-01 |
| MSMEG_6834 | alcohol dehydrogenase                               | NA | 1.092 | 5.42E-01 |
| MSMEG_6835 | Fatty acid desaturase                               | NA | 0.983 | 8.43E-01 |
| MSMEG_6836 | putative oxidoreductase                             | NA | 1.137 | 6.36E-01 |
| MSMEG_6837 | haloalkane dehalogenase                             | NA | 1.112 | 4.39E-01 |
| MSMEG_6838 | putative esterase                                   | NA | 0.935 | 5.25E-01 |
| MSMEG_6839 | transcriptional regulator, AraC family protein      | NA | 1.088 | 3.52E-01 |
| MSMEG_6840 | LysR-family protein transcriptional regulator       | NA | 1.556 | 3.31E-01 |
| MSMEG_6841 | hypothetical protein                                | NA | 1.253 | 4.92E-01 |
| MSMEG_6842 | 2,2-dialkylglycine decarboxylase                    | NA | 1.312 | 1.07E-01 |
| MSMEG_6843 | NAD-dependent epimerase/dehydratase                 | NA | 0.868 | 3.13E-01 |
| MSMEG_6844 | trap-t family protein transporter, dctp             | NA | 1.093 | 3.62E-01 |
| MSMEG_6845 | trap dicarboxylate transporter, dctm subunit        | NA | 0.897 | 3.41E-01 |
| MSMEG_6846 | putative C4 decarboxylate transport protein         | NA | 1.198 | 3.34E-01 |
| MSMEG_6847 | conserved hypothetical protein                      | NA | 1.638 | 1.40E-01 |
| MSMEG_6848 | putative oxidoreductase                             | NA | 3.825 | 2.31E-01 |
| MSMEG_6849 | LysR-family protein transcriptional regulator       | NA | 1.243 | 1.14E-01 |
| MSMEG_6850 | alpha/beta hydrolase                                | NA | 1.791 | 4.23E-01 |
| MSMEG_6851 | phosphatidylethanolamine-binding protein            | NA | 0.929 | 6.52E-01 |
| MSMEG_6852 | putative carboxylesterase/lipase                    | NA | 1.048 | 8.07E-01 |
| MSMEG_6853 | 3-isopropylmalate dehydratase small subunit         | NA | 1.317 | 8.03E-02 |
| MSMEG_6854 | 3-isopropylmalate dehydratase large subunit         | NA | 0.954 | 3.92E-01 |
| MSMEG_6855 | carboxyvinyl-carboxyphosphonate phosphorylmutase    | NA | 0.987 | 9.12E-01 |
| MSMEG_6856 | MmgE/PrpD family protein                            | NA | 1.080 | 5.82E-01 |
| MSMEG_6857 | putative transcription regulator                    | NA | 0.946 | 5.81E-01 |
| MSMEG_6858 | epoxide hydrolase 1                                 | NA | 1.391 | 1.93E-01 |
| MSMEG_6859 | oxidoreductase                                      | NA | 2.870 | 4.88E-02 |
| MSMEG_6860 | conserved hypothetical protein                      | NA | 0.998 | 9.72E-01 |

|            |                                                                                        |    |       |          |
|------------|----------------------------------------------------------------------------------------|----|-------|----------|
| MSMEG_6861 | cupin domain protein                                                                   | NA | 1.205 | 3.38E-01 |
| MSMEG_6862 | putative transcription regulator                                                       | NA | 1.134 | 4.38E-01 |
| MSMEG_6863 | class II aldolase/adducin domain protein                                               | NA | 0.934 | 2.33E-01 |
| MSMEG_6864 | putative transcription regulator                                                       | NA | 1.200 | 1.06E-01 |
| MSMEG_6865 | ABC transporter solute binding lipoprotein                                             | NA | 1.314 | 1.75E-01 |
| MSMEG_6866 | dipeptide transport system permease protein DppB                                       | NA | 7.136 | 3.86E-01 |
| MSMEG_6867 | oligopeptide ABC transporter integral membrane protein                                 | NA | 1.398 | 1.81E-01 |
| MSMEG_6868 | oligopeptide ABC transporter ATP-binding protein; this gene contains a frame shift wh  | NA | 0.777 | 1.51E-01 |
| MSMEG_6868 | oligopeptide ABC transporter ATP-binding protein; this gene contains a frame shift wh  | NA | 2.544 | 4.01E-01 |
| MSMEG_6869 | regulatory protein                                                                     | NA | 1.021 | 7.41E-01 |
| MSMEG_6870 | creatinine amidohydrolase                                                              | NA | 1.149 | 4.92E-01 |
| MSMEG_6871 | isomerase                                                                              | NA | 0.970 | 8.08E-01 |
| MSMEG_6872 | beta-lactamase                                                                         | NA | 0.843 | 5.12E-01 |
| MSMEG_6873 | enoyl-CoA hydratase/isomerase; this gene contains a frame shift which is not the resul | NA | 0.944 | 7.07E-01 |
| MSMEG_6873 | enoyl-CoA hydratase/isomerase; this gene contains a frame shift which is not the resul | NA | 1.227 | 2.86E-01 |
| MSMEG_6874 | aldehyde dehydrogenase                                                                 | NA | 0.830 | 3.15E-01 |
| MSMEG_6875 | endoribonuclease L-PSP family protein                                                  | NA | 0.752 | 4.89E-02 |
| MSMEG_6876 | branched chain amino acid transport ATP-binding protein                                | NA | 1.033 | 8.32E-01 |
| MSMEG_6877 | branched-chain amino acid transport system ATP-binding protein                         | NA | 0.919 | 6.02E-01 |
| MSMEG_6878 | inner-membrane translocator                                                            | NA | 1.078 | 7.16E-01 |
| MSMEG_6879 | integral membrane protein of the ABC-type Nat permease for neutral amino acids Nat     | NA | 0.735 | 8.62E-02 |
| MSMEG_6880 | hydrophobic amino acid ABC transporter, putative                                       | NA | 0.924 | 3.94E-01 |
| MSMEG_6881 | transcriptional regulator, GntR family protein                                         | NA | 1.034 | 7.75E-01 |
| MSMEG_6882 | LysR-family protein transcriptional regulator                                          | NA | 1.252 | 2.50E-01 |
| MSMEG_6883 | hypothetical protein; this region contains one or more premature stops and/or frames   | NA | 0.921 | 4.02E-01 |
| MSMEG_6884 | NADP oxidoreductase, coenzyme f420-dependent:6-phosphogluconate dehydrogenas           | NA | 2.371 | 3.19E-01 |
| MSMEG_6885 | Mmcl protein                                                                           | NA | 0.927 | 3.38E-01 |
| MSMEG_6886 | transcriptional regulator                                                              | NA | 1.129 | 2.36E-01 |
| MSMEG_6887 | amidohydrolase family protein                                                          | NA | 1.078 | 7.96E-01 |
| MSMEG_6888 | transposase subunit                                                                    | NA | 2.005 | 3.35E-01 |
| MSMEG_6889 | transposase                                                                            | NA | 1.092 | 4.10E-01 |

|            |                                                                                         |      |       |          |
|------------|-----------------------------------------------------------------------------------------|------|-------|----------|
| MSMEG_6890 | antibiotic biosynthesis monooxygenase domain protein                                    | NA   | 0.873 | 2.95E-01 |
| MSMEG_6891 | ribonuclease H; this region contains one or more premature stops and/or frameshifts     | NA   | 0.972 | 7.80E-01 |
| MSMEG_6892 | replicative DNA helicase                                                                | NA   | 0.913 | 7.46E-02 |
| MSMEG_6893 | hypothetical protein                                                                    | NA   | 0.956 | 7.40E-01 |
| MSMEG_6894 | ribosomal protein L9                                                                    | rplI | 1.232 | 5.16E-02 |
| MSMEG_6895 | ribosomal protein S18                                                                   | rpsR | 0.863 | 1.21E-01 |
| MSMEG_6896 | single-stranded DNA-binding protein                                                     | NA   | 0.877 | 5.81E-02 |
| MSMEG_6897 | ribosomal protein S6                                                                    | rpsF | 1.026 | 9.09E-01 |
| MSMEG_6898 | hypothetical protein                                                                    | NA   | 1.028 | 6.29E-01 |
| MSMEG_6899 | conserved hypothetical protein                                                          | NA   | 0.859 | 6.85E-03 |
| MSMEG_6900 | penicillin-binding protein 1                                                            | NA   | 0.943 | 2.45E-01 |
| MSMEG_6901 | conserved hypothetical protein                                                          | NA   | 0.974 | 8.11E-01 |
| MSMEG_6902 | putative membrane protein                                                               | NA   | 1.004 | 9.46E-01 |
| MSMEG_6903 | transcriptional regulator, PadR family protein                                          | NA   | 0.839 | 3.02E-02 |
| MSMEG_6904 | myo-inositol-1-phosphate synthase                                                       | NA   | 0.769 | 1.45E-02 |
| MSMEG_6906 | putative hydrolase                                                                      | NA   | 0.906 | 1.74E-02 |
| MSMEG_6907 | Mmcl protein                                                                            | NA   | 0.867 | 3.74E-02 |
| MSMEG_6908 | putative HTH-type transcriptional regulator                                             | NA   | 1.082 | 1.70E-01 |
| MSMEG_6909 | amino acid ABC transporter, permease protein, 3-TM region, His/Glu/Gln/Arg/opine family | NA   | 0.923 | 4.28E-01 |
| MSMEG_6911 | ABC transporter, ATP-binding protein GluA                                               | NA   | 1.032 | 7.96E-01 |
| MSMEG_6913 | putative transcriptional regulatory protein                                             | NA   | 0.987 | 8.70E-01 |
| MSMEG_6914 | conserved hypothetical protein                                                          | NA   | 1.295 | 5.87E-02 |
| MSMEG_6916 | short chain dehydrogenase                                                               | NA   | 1.099 | 5.78E-02 |
| MSMEG_6917 | leucyl-tRNA synthetase                                                                  | leuS | 1.323 | 3.74E-02 |
| MSMEG_6919 | proline-rich 28 kDa antigen                                                             | NA   | 1.056 | 9.74E-02 |
| MSMEG_6920 | hypothetical protein                                                                    | NA   | 1.082 | 2.51E-01 |
| MSMEG_6921 | conserved hypothetical protein                                                          | NA   | 0.996 | 9.70E-01 |
| MSMEG_6922 | transporter, major facilitator family protein                                           | NA   | 1.796 | 2.81E-02 |
| MSMEG_6923 | conserved hypothetical protein                                                          | NA   | 1.080 | 3.05E-01 |
| MSMEG_6925 | conserved hypothetical protein                                                          | NA   | 1.540 | 2.56E-01 |
| MSMEG_6926 | tRNA adenylyltransferase                                                                | NA   | 1.097 | 6.37E-02 |

|            |                                                |      |       |          |
|------------|------------------------------------------------|------|-------|----------|
| MSMEG_6927 | MutT/nudix family protein                      | NA   | 0.988 | 6.07E-01 |
| MSMEG_6928 | conserved hypothetical protein                 | NA   | 1.303 | 1.32E-02 |
| MSMEG_6929 | integral membrane protein MviN, putative       | NA   | 1.193 | 3.36E-01 |
| MSMEG_6930 | hypothetical protein                           | NA   | 1.740 | 3.86E-01 |
| MSMEG_6931 | RNA polymerase sigma-70 factor                 | NA   | 1.322 | 8.87E-02 |
| MSMEG_6932 | conserved hypothetical protein                 | NA   | 0.921 | 1.08E-01 |
| MSMEG_6933 | thioredoxin-disulfide reductase                | trxB | 0.981 | 8.08E-01 |
| MSMEG_6934 | thioredoxin                                    | trx  | 1.019 | 6.42E-01 |
| MSMEG_6935 | N-acetylmuramoyl-L-alanine amidase             | NA   | 1.281 | 4.04E-03 |
| MSMEG_6936 | conserved hypothetical protein                 | NA   | 1.102 | 3.15E-01 |
| MSMEG_6938 | ParB-like partition proteins                   | NA   | 0.872 | 1.58E-01 |
| MSMEG_6939 | Soj family protein                             | NA   | 0.960 | 4.38E-01 |
| MSMEG_6940 | methyltransferase GidB                         | gidB | 1.048 | 4.75E-01 |
| MSMEG_6941 | R3H domain-containing protein                  | NA   | 1.110 | 4.20E-01 |
| MSMEG_6942 | membrane protein OxaA                          | NA   | 1.148 | 9.48E-03 |
| MSMEG_6944 | conserved hypothetical protein, putative       | NA   | 1.009 | 7.36E-01 |
| MSMEG_6945 | ribonuclease P protein component               | rnpA | 0.966 | 7.98E-02 |
| MSMEG_6946 | ribosomal protein L34                          | rpmH | 1.079 | 6.94E-01 |
| MSMEG_6947 | chromosomal replication initiator protein DnaA | dnaA | 0.957 | 1.43E-01 |

**Results are based on four biological repeats (adjusted P values are shown), which included two dye swaps.**
